# Supplementary material
Source: HighWire-hosted journal article supplement (https://gut.bmj.com/content/68/5/854)
Supplement: inline-supplementary-material-2 [file inline-supplementary-material-2.pdf]

## LEGEND OF SUPPLEMENTARY TABLES

Supplementary Table 1: GWAS candidate SNPs associated with diverticular disease (with CADD score, Regulome score and eQTL sigmoid colon annotation)

Supplementary Table 2: Genes implicated by positional, eQTL, or chromatin interaction mapping of SNPs associated with diverticular disease by FUMA

Supplementary Table 3: Identification of curated lead candidate gene(s) (CCG) at the identified genomic risk locations for diverticular disease

Supplementary Table 4: Results of GWAS analysis in diverticular disease present study in comparison to Maguire et al. (2018).

Supplementary Table 5: GWAS lead variants and replication results

Supplementary Table 6: Replicating loci ordered by discovery p-value

Supplementary Table 7: Characteristics of patients used for RT-PCR of curated candidate transcripts in colon tissue

Supplementary Table 8: Primer sequences used for real time (RT) PCR of colon tissue

Supplementary Table 9: Results of differential expression analysis in controls

Supplementary Table 10: Results of phenotype-specific expression analysis in anatomical layers of the colon

Supplementary Table 11: Gene set enrichment analysis (GSEA) for GO: Biological Process Ontology using the 48 curated candidate genes for diverticular disease

Supplementary Table 12: Gene set enrichment analysis (GSEA) for CP: Canonical pathways Ontology using the 48 curated candidate genes for diverticular disease

Supplementary Table 13: VEGAS2PathwayAnalysis

Supplementary Table 14: VEGAS2 pathway analysis of gene-based test statistics using summary data from the UK Biobank GWAS analysis for diverticular disease.

Supplementary Table 15: GWAS analysis of regulatory and functional information enrichment with LD correction (GARFIELD)

Supplementary Table 16: Overview of the study populations included in risk differentiation of diverticulitis versus diverticulosis

Supplementary Table 17: Results of comparison of diverticulitis versus diverticulosis risk

Supplementary Table 18: Genetic overlap with Mendelian diseases (OMIM- Online Mendelian Inheritance in Man)

Supplementary Table 19: Genetic overlap with Mendelian diseases (OMIM- Online Mendelian Inheritance in Man) - 500 kilo-base (kb) window

Supplementary Table 20: eQTL analysis

Supplementary Table 21: Potential functional implications of candidate SNPs associated with diverticular disease (by CADD score >12.37 in descending order)

***Supplementary Table 1: GWAS candidate SNPs associated with diverticular disease (with CADD score, Regulome score and eQTL sigmoid colon annotation)***

This table shows diverticular disease candidate SNPs (SNPs which are in LD of any independent lead SNPs) mapped to genomic risk loci with a GWAS p-value  $<1.0 \times 10^{-5}$ , MAF  $>0.01$ . The table is sorted ascending by genomic risk loci and in descending order by Combined Annotation-Dependent Depletion (CADD) score as a potential indicator of functional implications. Correspondingly all exonic nonsynonymous SNPs and variant that affect gene expression of candidate genes in sigmoid colon tissue (FDR  $<0.05$ \_eQTL, GTEx\_V7) as a potential indicator of functional implications are shown. The following table headers are used: uniqID: Unique ID of SNPs consisting of chr:position:allele1:allele2 where alleles are alphabetically ordered; rsID : rsID based on dbSNP build 146; chr : chromosome; pos : position on hg19; effect\_allele : Effect/risk allele ; non\_effect\_allele : Non-effect/non-risk ; MAF : Minor allele frequency computed based on 1000G; gwasP : P-value provided in the input GWAS summary statistics file; r2 : The maximum r2 of the SNP with one of the independent significant SNPs; IndSigSNP: rsID of the independent significant SNP which has the maximum r2 with the SNP; Genomic locus : Index of the genomic risk loci matching with "Genomic risk loci" Supplementary Table 5; nearestGene: The nearest Gene of the SNP based on ANNOVAR annotations; ANNOVAR annotates "consequence" function by prioritizing the most deleterious annotation for SNPs which are locating a genomic region where multiple genes are overlapped. Genes are encoded in symbol, if it is available otherwise Ensembl ID. Genes include all transcripts from Ensembl gene build 85 including non-protein coding genes and RNAs. eQTL Gene 1 and 2: Genes affected in expression in sigmoid colon tissue (FDR  $<0.05$ \_eQTL, GTEx\_V7) by candidate SNPs; P\_eQTL: nominal p value for cis-eQTL variant. FDR\_eQTL: false discovery rate corrected p value for cis-eQTL variant; CADD: CADD score which is computed based on 63 annotations. The higher the score, the more deleterious the SNP is. 12.37 is the suggested threshold by Kircher et al (2014). RDB : RegulomeDB score which is a categorical score (from 1a to 7). 1a is the highest score for SNPs with the most biological evidence to be a regulatory element. minChrState : The minimum 15-core chromatin state across 127 tissue/cell type.

***References used in Supplementary Table 1:***

Kircher M, Witten DM, Jain P, O'Roak BJ, Cooper GM, Shendure J. A general framework for estimating the relative pathogenicity of human genetic variants. *Nat Genet.* 2014 Mar;46(3):310-5.

| DiscoveryLocus | top_lead_SNP_uniqID | #candidate SNPs | chr       | pos     | non_effect_allele | effect_allele | MAF      | gnasP      | r2                 | IndelSNP                  | nearestGene (Ensembl) | AnnoType   | Consequence               | ConDetail    | GeneName 2                | AnnoType | Consequence | ConDetail                 | signifmod_colon_eqtMafPit | eQTL Gene 1 | p_eQTL | FDR<0.05_eQTL | eQTL Gene 2 | p_eQTL | FDR<0.05_eQTL | DiscoveryLocus | CADD  | RDB   | minChRate | CADD top (without pseudogenes) |  |  |
|----------------|---------------------|-----------------|-----------|---------|-------------------|---------------|----------|------------|--------------------|---------------------------|-----------------------|------------|---------------------------|--------------|---------------------------|----------|-------------|---------------------------|---------------------------|-------------|--------|---------------|-------------|--------|---------------|----------------|-------|-------|-----------|--------------------------------|--|--|
| 1              | r51913166           | 2               | 144131821 | G       | A                 | 0.2306        | 5.9e-09  | 0.897371   | r51615162          | ARHGAP15                  | Transcript            | INTRONIC   | intron                    | RP1-143622.1 | Transcript                | INTRONIC | intronic    | intron                    | 0                         |             |        |               |             |        |               |                |       |       |           |                                |  |  |
| 1              | r50864317           | 2               | 144074015 | C       | A                 | 0.3111        | 2.4e-26  | 0.937379   | r51167960          | ARHGAP15                  | Transcript            | INTRONIC   | intron,feature_truncation | RP1-143622.1 | Transcript                | INTRONIC | intronic    | intron,feature_truncation | 0                         |             |        |               |             |        |               |                | top   | 2.24  | 7         | 5                              |  |  |
| 1              | r5070973            | 2               | 144281919 | T       | A                 | 0.1809        | 9.8e-54  | 0.972062   | r6734367           | ARHGAP15                  | Transcript            | INTRONIC   | intron                    | RP1-143622.1 | Transcript                | INTRONIC | intronic    | intron                    | 0                         |             |        |               |             |        |               |                | 2.06  | 5     | 4         |                                |  |  |
| 1              | 214428109_TA_T      | 2               | 144281091 | T       | TA                | 0.1819        | 4.4e-53  | 0.979139   | r6734367           | ARHGAP15                  | Transcript            | INTRONIC   | intron,feature_truncation | RP1-143622.1 | Transcript                | INTRONIC | intronic    | intron,feature_truncation | 0                         |             |        |               |             |        |               |                | 19.79 | NA    | 4         |                                |  |  |
| 1              | r51148501           | 2               | 144180991 | G       | C                 | 0.2306        | 3.2e-09  | 0.897371   | r51615162          | ARHGAP15                  | Transcript            | INTRONIC   | intron                    | RP1-143622.1 | Transcript                | INTRONIC | intronic    | intron                    | 0                         |             |        |               |             |        |               |                | 2.06  | 29    | 1         |                                |  |  |
| 1              | r50292184           | A               | 0.2376    | 1.4e-09 | 0.942787          | r51615162     | ARHGAP15 | Transcript | INTRONIC           | intron                    | RP1-143622.1          | Transcript | INTRONIC                  | intronic     | intron                    | 0        |             |                           |                           |             |        |               |             |        |               |                | 18.55 | 4     | 4         |                                |  |  |
| 1              | r50179961           | 2               | 144342061 | T       | C                 | 0.1799        | 5.1e-54  | 0.910892   | r6734367           | ARHGAP15                  | Transcript            | INTRONIC   | intron                    | RP1-143622.1 | Transcript                | INTRONIC | intronic    | intron                    | 0                         |             |        |               |             |        |               |                | 18.46 | 5     | 1         |                                |  |  |
| 1              | r51211204           | 2               | 144178400 | C       | T                 | 0.1797        | 3.4e-09  | 0.910892   | r51211204          | ARHGAP15                  | Transcript            | INTRONIC   | intron                    | RP1-143622.1 | Transcript                | INTRONIC | intronic    | intron                    | 0                         |             |        |               |             |        |               |                | 18.24 | 1     |           |                                |  |  |
| 1              | 2144437590_TAAAAAA  | 2               | 144437590 | T       | TAAAAAAA          | 0.1839        | 4.6e-12  | 1          | 2144437590_TAAAAAA | ARHGAP15                  | Transcript            | INTRONIC   | intron,feature_truncation | RP1-143622.1 | Transcript                | INTRONIC | intronic    | intron,feature_truncation | 0                         |             |        |               |             |        |               |                |       | 17.58 | NA        | 5                              |  |  |
| 1              | r4662118            | 2               | 144280806 | G       | A                 | 0.22485       | 5.6e-09  | 1          | r4662118           | ARHGAP15                  | Transcript            | INTRONIC   | intron                    | RP1-143622.1 | Transcript                | INTRONIC | intronic    | intron                    | 0                         |             |        |               |             |        |               |                | 16.75 | 5     | 1         |                                |  |  |
| 1              | 2144131721_TTAGA_T  | 2               | 144137071 | T       | TTAG              | 0.2375        | 1.1e-09  | 1          | r51615162          | ARHGAP15                  | Transcript            | INTRONIC   | intron,feature_truncation | RP1-143622.1 | Transcript                | INTRONIC | intronic    | intron,feature_truncation | 0                         |             |        |               |             |        |               |                | 16.64 | 1     |           |                                |  |  |
| 1              | r50704060           | 2               | 144317029 | T       | A                 | 0.2416        | 2.3e-09  | 0.952657   | r51615162          | ARHGAP15                  | Transcript            | INTRONIC   | intron                    | RP1-143622.1 | Transcript                | INTRONIC | intronic    | intron                    | 0                         |             |        |               |             |        |               |                | 16.43 | 4     | 4         |                                |  |  |
| 1              | r51312193           | 2               | 144343620 | C       | T                 | 0.1405        | 1.0e-12  | 0.9608     | r51402906          | ARHGAP15                  | Transcript            | INTRONIC   | intron                    | RP1-143622.1 | Transcript                | INTRONIC | intronic    | intron                    | 0                         |             |        |               |             |        |               |                | 16.29 | 5     | 1         |                                |  |  |
| 1              | r5050013            | 2               | 144180869 | C       | T                 | 0.4433        | 1.4e-17  | 0.615162   | r50516719          | ARHGAP15                  | Transcript            | INTRONIC   | intron                    | RP1-143622.1 | Transcript                | INTRONIC | intronic    | intron                    | 0                         |             |        |               |             |        |               |                | 16.27 | 1     |           |                                |  |  |
| 1              | r44146423           | C               | 0.2247    | 1.3e-46 | 0.616181          | r6734367      | ARHGAP15 | Transcript | INTRONIC           | intron                    | RP1-143622.1          | Transcript | INTRONIC                  | intronic     | intron                    | 0        |             |                           |                           |             |        |               |             |        |               |                | 16.13 | 6     | 4         |                                |  |  |
| 1              | r44321606           | 2               | 144332854 | C       | T                 | 0.4085        | 7.4e-13  | 0.988232   | r14029006          | ARHGAP15                  | Transcript            | INTRONIC   | intron                    | RP1-143622.1 | Transcript                | INTRONIC | intronic    | intron                    | 0                         |             |        |               |             |        |               |                | 15.66 | 5     | 4         |                                |  |  |
| 1              | r51340859           | 2               | 144463275 | A       | G                 | 0.24374       | 6.4e-09  | 0.710917   | r13883236          | ARHGAP15                  | Transcript            | INTRONIC   | intron                    | RP1-143622.1 | Transcript                | INTRONIC | intronic    | intron                    | 0                         |             |        |               |             |        |               |                | 15.33 | 4     |           |                                |  |  |
| 1              | r4611538            | 2               | 144198216 | G       | A                 | 0.1561        | 6.9e-08  | 0.814491   | r6723640           | ARHGAP15                  | Transcript            | INTRONIC   | intron                    | RP1-143622.1 | Transcript                | INTRONIC | intronic    | intron                    | 0                         |             |        |               |             |        |               |                | 15.13 | 6     | 4         |                                |  |  |
| 1              | r44233568           | 2               | 144233180 | A       | G                 | 0.2227        | 8.0e-07  | 0.670343   | r6734367           | ARHGAP15                  | Transcript            | INTRONIC   | intron                    | RP1-143622.1 | Transcript                | INTRONIC | intronic    | intron                    | 0                         |             |        |               |             |        |               |                | 14.84 | 6     | 4         |                                |  |  |
| 1              | r512394189          | 2               | 144232064 | T       | C                 | 0.2306        | 5.5e-09  | 0.897371   | r51615162          | ARHGAP15                  | Transcript            | INTRONIC   | intron                    | RP1-143622.1 | Transcript                | INTRONIC | intronic    | intron                    | 0                         |             |        |               |             |        |               |                | 14.67 | 7     | 4         |                                |  |  |
| 1              | r511898289          | 2               | 144347805 | T       | C                 | 0.2316        | 4.5e-09  | 0.891938   | r51615162          | ARHGAP15                  | Transcript            | INTRONIC   | intron                    | RP1-143622.1 | Transcript                | INTRONIC | intronic    | intron                    | 0                         |             |        |               |             |        |               |                | 14.48 | 7     | 4         |                                |  |  |
| 1              | r50929186           | 2               | 144310402 | A       | G                 | 0.2416        | 2.0e-09  | 0.952657   | r51615162          | ARHGAP15                  | Transcript            | INTRONIC   | intron                    | RP1-143622.1 | Transcript                | INTRONIC | intronic    | intron                    | 0                         |             |        |               |             |        |               |                | 14.19 | 6     | 2         |                                |  |  |
| 1              | r44662120           | 2               | 144384755 | C       | T                 | 0.159         | 6.8e-06  | 0.808238   | r6723640           | ARHGAP15                  | Transcript            | INTRONIC   | intron                    | RP1-143622.1 | Transcript                | INTRONIC | intronic    | intron                    | 0                         |             |        |               |             |        |               |                | 13.82 | 29    | 5         |                                |  |  |
| 1              | r510167657          | 2               | 144333705 | G       | C                 | 0.2306        | 5.0e-09  | 0.897371   | r51615162          | ARHGAP15                  | Transcript            | INTRONIC   | intron                    | RP1-143622.1 | Transcript                | INTRONIC | intronic    | intron                    | 0                         |             |        |               |             |        |               |                | 13.54 | 6     | 5         |                                |  |  |
| 1              | r44146022           | 2               | 144378627 | A       | G                 | 0.1465        | 3.3e-22  | 1          | r446022            | ARHGAP15                  | Transcript            | INTRONIC   | intron                    | RP1-143622.1 | Transcript                | INTRONIC | intronic    | intron                    | 0                         |             |        |               |             |        |               |                | 13.23 | 7     | 4         |                                |  |  |
| 1              | r51083495           | 2               | 144323550 | A       | G                 | 0.2347        | 1.3e-46  | 0.616181   | r6734367           | ARHGAP15                  | Transcript            | INTRONIC   | intron                    | RP1-143622.1 | Transcript                | INTRONIC | intronic    | intron                    | 0                         |             |        |               |             |        |               |                | 12.62 | 5     | 4         |                                |  |  |
| 1              | r512989517          | 2               | 144498931 | G       | C                 | 0.3718        | 3.3e-22  | 0.818256   | r51298858          | ARHGAP15                  | Transcript            | INTRONIC   | intron                    | RP1-143622.1 | Transcript                | INTRONIC | intronic    | intron                    | 0                         |             |        |               |             |        |               |                | 12.34 | 7     | 2         |                                |  |  |
| 1              | r50249597           | 2               | 144483781 | T       | A                 | 0.3469        | 5.5e-08  | 0.738872   | r10592197          | ARHGAP15                  | Transcript            | INTRONIC   | intron                    | RP1-143622.1 | Transcript                | INTRONIC | intronic    | intron                    | 0                         |             |        |               |             |        |               |                | 12.33 | 5     | 4         |                                |  |  |
| 1              | r42731563           | C               | 0.2107    | 2.1e-09 | 0.970445          | r51167960     | ARHGAP15 | Transcript | INTRONIC           | intron                    | RP1-143622.1          | Transcript | INTRONIC                  | intronic     | intron                    | 0        |             |                           |                           |             |        |               |             |        |               |                | 12.19 | 1     |           |                                |  |  |
| 1              | r64217309           | C               | 0.07753   | 2.3e-19 | 1                 | r64217309     | ARHGAP15 | Transcript | INTRONIC           | intron                    | RP1-143622.1          | Transcript | INTRONIC                  | intronic     | intron                    | 0        |             |                           |                           |             |        |               |             |        |               |                |       | 11.74 | 5         | 4                              |  |  |
| 1              | r51018734           | 2               | 144330021 | A       | T                 | 0.2316        | 5.6e-09  | 0.891938   | r51615162          | ARHGAP15                  | Transcript            | INTRONIC   | intron                    | RP1-143622.1 | Transcript                | INTRONIC | intronic    | intron                    | 0                         |             |        |               |             |        |               |                | 11.22 | 5     | 4         |                                |  |  |
| 1              | r50706216           | 2               | 144219957 | T       | C                 | 0.2306        | 4.4e-09  | 0.897371   | r51615162          | ARHGAP15                  | Transcript            | INTRONIC   | intron                    | RP1-143622.1 | Transcript                | INTRONIC | intronic    | intron                    | 0                         |             |        |               |             |        |               |                | 11.16 | 4     |           |                                |  |  |
| 1              | r51001406           | 2               | 144352437 | C       | A                 | 0.2316        | 8.4e-09  | 0.891938   | r51615162          | ARHGAP15                  | Transcript            | INTRONIC   | intron                    | RP1-143622.1 | Transcript                | INTRONIC | intronic    | intron                    | 0                         |             |        |               |             |        |               |                | 11.08 | 5     | 4         |                                |  |  |
| 1              | r50206067           | 2               | 144477751 | A       | G                 | 0.4702        | 1.4e-15  | 1          | r50206067          | ARHGAP15                  | Transcript            | INTRONIC   | intron                    | RP1-143622.1 | Transcript                | INTRONIC | intronic    | intron                    | 0                         |             |        |               |             |        |               |                | 11.01 | 5     | 4         |                                |  |  |
| 1              | r51341759           | 2               | 144316090 | A       | G                 | 0.4215        | 1.1e-12  | 0.90154    | r51402906          | ARHGAP15                  | Transcript            | INTRONIC   | intron                    | RP1-143622.1 | Transcript                | INTRONIC | intronic    | intron                    | 0                         |             |        |               |             |        |               |                | 10.44 | 7     | 4         |                                |  |  |
| 1              | r50223683           | 2               | 144479235 | T       | C                 | 0.4146        | 8.9e-09  | 0.952657   | r51615162          | ARHGAP15                  | Transcript            | INTRONIC   | intron                    | RP1-143622.1 | Transcript                | INTRONIC | intronic    | intron                    | 0                         |             |        |               |             |        |               |                | 9.98  | 5     | 4         |                                |  |  |
| 1              | r5075423            | 2               | 144187417 | G       | A                 | 0.1797        | 6.5e-08  | 0.973042   | r12612084          | ARHGAP15                  | Transcript            | INTRONIC   | intron                    | RP1-143622.1 | Transcript                | INTRONIC | intronic    | intron                    | 0                         |             |        |               |             |        |               |                | 9.88  | 3     | 5         |                                |  |  |
| 1              | r50291823           | 2               | 144282635 | T       | C                 | 0.2376        | 1.1e-09  | 0.942787   | r51615162          | ARHGAP15                  | Transcript            | INTRONIC   | intron                    | RP1-143622.1 | Transcript                | INTRONIC | intronic    | intron                    | 0                         |             |        |               |             |        |               |                | 9.80  | 8     | 4         |                                |  |  |
| 1              | 2144483991_CA_C     | 2               | 144483991 | C       | CA                | 0.3509        | 8.9e-08  | 0.773433   | r10592197          | ARHGAP15                  | Transcript            | INTRONIC   | intron,feature_truncation | RP1-143622.1 | Transcript                | INTRONIC | intronic    | intron,feature_truncation | 0                         |             |        |               |             |        |               |                | 9.54  | NA    | 1         |                                |  |  |
| 1              | 2144281782_AT_A     | 2               | 144281782 | A       | AT                | 0.1819        | 2.4e-51  | 0.979139   | r6734367           | ARHGAP15                  | Transcript            | INTRONIC   | intron,feature_truncation | RP1-143622.1 | Transcript                | INTRONIC | intronic    | intron,feature_truncation | 0                         |             |        |               |             |        |               |                | 9.51  | NA    | 1         |                                |  |  |
| 1              | r50593812           | 2               | 144423663 | A       | T                 | 0.1562        | 9.0e-11  | 0.781334   | r205945381         | ARHGAP15                  | Transcript            | INTRONIC   | intron                    | RP1-143622.1 | Transcript                | INTRONIC | intronic    | intron                    | 0                         |             |        |               |             |        |               |                | 9.304 | 4     |           |                                |  |  |
| 1              | 2144349006_ACT_A    | 2               | 144349006 | A       | ACT               | 0.1789        | 6.3e-54  | 0.942787   | r6734367           | ARHGAP15                  | Transcript            | INTRONIC   | intron,feature_truncation | RP1-143622.1 | Transcript                | INTRONIC | intronic    | intron,feature_truncation | 0                         |             |        |               |             |        |               |                | 9.15  | NA    | 1         |                                |  |  |
| 1              | r57412890           | C               | 0.2883    | 4.4e-09 | 0.7958            | r527110833    | ARHGAP15 | Transcript | INTRONIC           | intron,feature_truncation | RP1-143622.1          | Transcript | INTRONIC                  | intronic     | intron,feature_truncation | 0        |             |                           |                           |             |        |               |             |        |               |                | 8.92  | NA    | 5         |                                |  |  |
| 1              | r51092197           | 2               | 144491308 | A       | G                 | 0.3966        | 2.4e-09  | 1          | r51092197          | ARHGAP15                  | Transcript            | INTRONIC   | intron                    | RP1-143622.1 | Transcript                | INTRONIC | intronic    | intron                    | 0                         |             |        |               |             |        |               |                |       | 8.74  | 7         | 4                              |  |  |
| 1              | r51300571           | 2               | 144490931 | T       | C                 | 0.1708        | 4.4e-22  | 0.822517   | r12608658          | ARHGAP15                  | Transcript            | INTRONIC   | intron                    | RP1-143622.1 | Transcript                | INTRONIC | intronic    | intron                    | 0                         |             |        |               |             |        |               |                | 8.74  | 7     | 4         |                                |  |  |
| 1              | r511477811          | A               | 0.2883    | 4.2e-09 | 0.7958            | r527110833    | ARHGAP15 | Transcript | INTRONIC           | intron                    | RP1-143622.1          | Transcript | INTRONIC                  | intronic     | intron                    | 0        |             |                           |                           |             |        |               |             |        |               |                | 7.88  | 7     | 4         |                                |  |  |
| 1              | r4561605            | 2               | 144272150 | G       | C                 | 0.4493        | 1.1e-07  | 0.943893   | r13032344          | ARHGAP15                  | Transcript            | INTRONIC   | intron                    | RP1-143622.1 | Transcript                | INTRONIC | intronic    | intron                    | 0                         |             |        |               |             |        |               |                | 7.89  | 4     | 4         |                                |  |  |
| 1              | r51342656           | 2               | 144318058 | A       | G                 | 0.4085        | 6.8e-11  | 0.988271   | r14029006          | ARHGAP15                  | Transcript            | INTRONIC   | intron                    | RP1-143622.1 | Transcript                | INTRONIC | intronic    | intron                    | 0                         |             |        |               |             |        |               |                | 7.65  | 1     |           |                                |  |  |
| 1              | 2142826162          | G               | 0.2376    | 1.8e-09 | 0.942787          | r51615162     | ARHGAP15 | Transcript | INTRONIC           | intron                    | RP1-143622.1          | Transcript | INTRONIC                  | intronic     | intron                    | 0        |             |                           |                           |             |        |               |             |        |               |                | 7.26  | 6     | 4         |                                |  |  |
| 1              | r50929188           | 2               | 144352081 | A       | G                 | 0.2247        | 1.1e-46  | 0.616181   | r6734367           | ARHGAP15                  | Transcript            | INTRONIC   | intron                    | RP1-143622.1 | Transcript                | INTRONIC | intronic    | intron                    | 0                         |             |        |               |             |        |               |                |       |       |           |                                |  |  |

[illegible]

|   |                    |   |           |                |     |        |         |           |                    |          |            |          |        |                 |            |          |            |   |  |   |       |    |   |
|---|--------------------|---|-----------|----------------|-----|--------|---------|-----------|--------------------|----------|------------|----------|--------|-----------------|------------|----------|------------|---|--|---|-------|----|---|
| 1 | r55769935          | 2 | 14429912  | A              | G   | 0.2386 | 1.4e-09 | 0.95829   | r56151632          | ARHGAP15 | Transcript | INTRONIC | intron | RP11-414621.242 | Transcript | INTRONIC | intron_cnc | 0 |  | 1 | 0.880 | 7  | 4 |
| 1 | r4278793           | 2 | 14429242  | C              | T   | 0.1789 | 1.1e-54 |           | r6734367           | ARHGAP15 | Transcript | INTRONIC | intron | RP11-414621.243 | Transcript | INTRONIC | intron_cnc | 0 |  | 1 | 0.878 | 7  | 5 |
| 1 | r520231726         | 1 | 14421708  | T              | C   | 0.1322 | 2e-21   | 0.1728234 | r5202345381        | ARHGAP15 | Transcript | INTRONIC | intron | RP11-414621.244 | Transcript | INTRONIC | intron_cnc | 0 |  | 1 | 0.864 | 7  | 4 |
| 1 | r51071589          | 1 | 14429240  | C              | A   | 0.1809 | 7.4e-54 | 0.986011  | r6734367           | ARHGAP15 | Transcript | INTRONIC | intron | RP11-414621.245 | Transcript | INTRONIC | intron_cnc | 0 |  | 1 | 0.844 | 5  | 4 |
| 1 | r6727288           | 2 | 14427138  | C              | T   | 0.4423 | 4.1e-08 | 0.991473  | r55508804          | ARHGAP15 | Transcript | INTRONIC | intron | RP11-414621.246 | Transcript | INTRONIC | intron_cnc | 0 |  | 1 | 0.834 | 4  | 4 |
| 1 | 2.144404928 TA, T  | 1 | 144404928 | TA, T          | G   | 0.9776 | 1e-24   | 1         | 2.144404928 TA, T  | ARHGAP15 | Transcript | INTRONIC | intron | RP11-414621.247 | Transcript | INTRONIC | intron_cnc | 0 |  | 1 | 0.841 | NA | 4 |
| 1 | r4662124           | 1 | 14462124  | T              | G   | 0.2247 | 3.9e-08 | 1         | r4662124           | ARHGAP15 | Transcript | INTRONIC | intron | RP11-414621.248 | Transcript | INTRONIC | intron_cnc | 0 |  | 1 | 0.799 | 7  | 4 |
| 1 | 2.144300304 AAT, A | 2 | 144300304 | AAT            | AAT | 0.4414 | 3.1e-11 | 1         | 2.144300304 AAT, A | ARHGAP15 | Transcript | INTRONIC | intron | RP11-414621.249 | Transcript | INTRONIC | intron_cnc | 0 |  | 1 | 0.727 | NA | 5 |
| 1 | r11157900          | 1 | 14417900  | T              | G   | 0.1301 | 1.2e-20 | 1         | r11157900          | ARHGAP15 | Transcript | INTRONIC | intron | RP11-414621.250 | Transcript | INTRONIC | intron_cnc | 0 |  | 1 | 0.705 | 7  | 4 |
| 1 | r11290195          | 1 | 14439585  | A              | G   | 0.2674 | 6.1e-09 | 0.99949   | r527110833         | ARHGAP15 | Transcript | INTRONIC | intron | RP11-414621.251 | Transcript | INTRONIC | intron_cnc | 0 |  | 1 | 0.692 | 6  | 5 |
| 1 | r11889721          | 2 | 144327950 | C              | T   | 0.2316 | 6.0e-09 | 0.91838   | r56151632          | ARHGAP15 | Transcript | INTRONIC | intron | RP11-414621.252 | Transcript | INTRONIC | intron_cnc | 0 |  | 1 | 0.682 | 7  | 4 |
| 1 | r51077079          | 1 | 14441987  | T              | G   | 0.2763 | 4.4e-08 | 0.939919  | r527110833         | ARHGAP15 | Transcript | INTRONIC | intron | RP11-414621.253 | Transcript | INTRONIC | intron_cnc | 0 |  | 1 | 0.674 | 6  | 5 |
| 1 | r512211187         | 1 | 14448120  | ATGTTG         | A   | 0.804  | 1.1e-12 | 1         | r512211187         | ARHGAP15 | Transcript | INTRONIC | intron | RP11-414621.254 | Transcript | INTRONIC | intron_cnc | 0 |  | 1 | 0.647 | NA | 4 |
| 1 | r6217067           | 2 | 14426149  | A              | G   | 0.1779 | 2.8e-54 | 0.99298   | r6734367           | ARHGAP15 | Transcript | INTRONIC | intron | RP11-414621.255 | Transcript | INTRONIC | intron_cnc | 0 |  | 1 | 0.643 | 6  | 5 |
| 1 | r62005177          | 2 | 144421627 | A              | G   | 0.2763 | 5.5e-08 | 0.939919  | r527110833         | ARHGAP15 | Transcript | INTRONIC | intron | RP11-414621.256 | Transcript | INTRONIC | intron_cnc | 0 |  | 1 | 0.571 | 7  | 5 |
| 1 | r520231796         | 1 | 144441913 | GGT            | G   | 0.2763 | 5.5e-08 | 0.939919  | r527110833         | ARHGAP15 | Transcript | INTRONIC | intron | RP11-414621.257 | Transcript | INTRONIC | intron_cnc | 0 |  | 1 | 0.561 | NA | 4 |
| 1 | r54010241          | 2 | 14428095  | TTA            | T   | 0.1352 | 9.4e-06 | 0.77917   | r6273640           | ARHGAP15 | Transcript | INTRONIC | intron | RP11-414621.258 | Transcript | INTRONIC | intron_cnc | 0 |  | 1 | 0.541 | NA | 5 |
| 1 | r54006062          | 2 | 14429934  | A              | G   | 0.4881 | 3.2e-21 | 0.905454  | 2.144305254 CT, C  | ARHGAP15 | Transcript | INTRONIC | intron | RP11-414621.259 | Transcript | INTRONIC | intron_cnc | 0 |  | 1 | 0.541 | 7  | 5 |
| 1 | r1122115115        | 2 | 14443226  | C              | T   | 0.2773 | 8.2e-08 | 0.855139  | r527110833         | ARHGAP15 | Transcript | INTRONIC | intron | RP11-414621.260 | Transcript | INTRONIC | intron_cnc | 0 |  | 1 | 0.527 | 6  | 5 |
| 1 | r510770378         | 2 | 14438078  | T              | C   | 0.2237 | 8.5e-47 | 0.65592   | r6734367           | ARHGAP15 | Transcript | INTRONIC | intron | RP11-414621.261 | Transcript | INTRONIC | intron_cnc | 0 |  | 1 | 0.509 | 5  | 5 |
| 1 | r51019845          | 2 | 14446087  | C              | G   | 0.3539 | 2.7e-20 | 0.734837  | r6734367           | ARHGAP15 | Transcript | INTRONIC | intron | RP11-414621.262 | Transcript | INTRONIC | intron_cnc | 0 |  | 1 | 0.509 | 5  | 4 |
| 1 | r57062381          | 1 | 14445243  | AAT            | A   | 0.3549 | 4.1e-20 | 0.739357  | r6734367           | ARHGAP15 | Transcript | INTRONIC | intron | RP11-414621.263 | Transcript | INTRONIC | intron_cnc | 0 |  | 1 | 0.475 | NA | 4 |
| 1 | r556741473         | 2 | 144490479 | GT             | G   | 0.3509 | 6.1e-11 | 1         | r556741473         | ARHGAP15 | Transcript | INTRONIC | intron | RP11-414621.264 | Transcript | INTRONIC | intron_cnc | 0 |  | 1 | 0.472 | NA | 5 |
| 1 | r67355850          | 2 | 144345616 | A              | G   | 0.2806 | 3.4e-09 | 0.897371  | r56151632          | ARHGAP15 | Transcript | INTRONIC | intron | RP11-414621.265 | Transcript | INTRONIC | intron_cnc | 0 |  | 1 | 0.468 | 7  | 4 |
| 1 | r54491526          | 1 | 14427756  | C              | G   | 0.4794 | 5.4e-08 | 0.959728  | r55508804          | ARHGAP15 | Transcript | INTRONIC | intron | RP11-414621.266 | Transcript | INTRONIC | intron_cnc | 0 |  | 1 | 0.465 | 7  | 4 |
| 1 | r5368217420        | 2 | 144349201 | TC             | T   | 0.1767 | 7.5e-32 | 1         | r5368217420        | ARHGAP15 | Transcript | INTRONIC | intron | RP11-414621.267 | Transcript | INTRONIC | intron_cnc | 0 |  | 1 | 0.442 | NA | 4 |
| 1 | r11839012          | 2 | 144274527 | T              | G   | 0.4903 | 1.4e-22 | 0.986169  | 2.144305254 CT, C  | ARHGAP15 | Transcript | INTRONIC | intron | RP11-414621.268 | Transcript | INTRONIC | intron_cnc | 0 |  | 1 | 0.436 | 6  | 4 |
| 1 | r17364524          | 1 | 14427756  | C              | A   | 0.1728 | 1.6e-23 | 1         | r17364524          | ARHGAP15 | Transcript | INTRONIC | intron | RP11-414621.269 | Transcript | INTRONIC | intron_cnc | 0 |  | 1 | 0.426 | 5  | 5 |
| 1 | r10298176          | 2 | 144186113 | T              | G   | 0.1551 | 9.3e-06 | 0.821345  | r6273640           | ARHGAP15 | Transcript | INTRONIC | intron | RP11-414621.270 | Transcript | INTRONIC | intron_cnc | 0 |  | 1 | 0.425 | 7  | 5 |
| 1 | r42477108          | 2 | 14439018  | C              | A   | 0.4245 | 2.6e-14 | 0.880546  | r6430036           | ARHGAP15 | Transcript | INTRONIC | intron | RP11-414621.271 | Transcript | INTRONIC | intron_cnc | 0 |  | 1 | 0.418 | 6  | 5 |
| 1 | r11504125          | 2 | 144344913 | T              | G   | 0.2306 | 3.6e-09 | 0.897371  | r56151632          | ARHGAP15 | Transcript | INTRONIC | intron | RP11-414621.272 | Transcript | INTRONIC | intron_cnc | 0 |  | 1 | 0.395 | 6  | 4 |
| 1 | r170031864         | 2 | 14419555  | C              | A   | 0.1581 | 6.1e-06 | 0.815     | r6734367           | ARHGAP15 | Transcript | INTRONIC | intron | RP11-414621.273 | Transcript | INTRONIC | intron_cnc | 0 |  | 1 | 0.354 | 6  | 5 |
| 1 | r11892876          | 2 | 144326184 | G              | A   | 0.4533 | 1.8e-12 | 0.81341   | r14409006          | ARHGAP15 | Transcript | INTRONIC | intron | RP11-414621.274 | Transcript | INTRONIC | intron_cnc | 0 |  | 1 | 0.353 | 7  | 4 |
| 1 | r12691488          | 2 | 144412819 | T              | G   | 0.3072 | 1.9e-28 | 0.95751   | r114379000         | ARHGAP15 | Transcript | INTRONIC | intron | RP11-414621.275 | Transcript | INTRONIC | intron_cnc | 0 |  | 1 | 0.353 | 5  | 4 |
| 1 | r57294814          | 1 | 14441489  | C              | G   | 0.2761 | 4.5e-08 | 0.818515  | r527110833         | ARHGAP15 | Transcript | INTRONIC | intron | RP11-414621.276 | Transcript | INTRONIC | intron_cnc | 0 |  | 1 | 0.299 | 5  | 5 |
| 1 | r6717024           | 2 | 14430870  | G              | C   | 0.1789 | 4.6e-55 | 1         | r6734367           | ARHGAP15 | Transcript | INTRONIC | intron | RP11-414621.277 | Transcript | INTRONIC | intron_cnc | 0 |  | 1 | 0.299 | 5  | 5 |
| 1 | r11769792          | 2 | 14443071  | G              | A   | 0.3678 | 4.0e-22 | 0.707754  | r6734367           | ARHGAP15 | Transcript | INTRONIC | intron | RP11-414621.278 | Transcript | INTRONIC | intron_cnc | 0 |  | 1 | 0.272 | 6  | 4 |
| 1 | r56516814          | 1 | 14429061  | GT             | G   | 0.4215 | 4.0e-14 | 0.793602  | r4430036           | ARHGAP15 | Transcript | INTRONIC | intron | RP11-414621.279 | Transcript | INTRONIC | intron_cnc | 0 |  | 1 | 0.265 | 0  | 5 |
| 1 | r57615295          | 2 | 144425178 | T              | G   | 0.1789 | 6.3e-12 | 1         | r200345381         | ARHGAP15 | Transcript | INTRONIC | intron | RP11-414621.280 | Transcript | INTRONIC | intron_cnc | 0 |  | 1 | 0.260 | 6  | 5 |
| 1 | r6459485           | 2 | 144347994 | T              | G   | 0.1789 | 3.0e-54 | 0.817042  | r6734367           | ARHGAP15 | Transcript | INTRONIC | intron | RP11-414621.281 | Transcript | INTRONIC | intron_cnc | 0 |  | 1 | 0.229 | 7  | 4 |
| 1 | r57404480          | 2 | 14434847  | AAT            | A   | 0.0765 | 1.2e-23 | 0.91111   | r63157684          | ARHGAP15 | Transcript | INTRONIC | intron | RP11-414621.282 | Transcript | INTRONIC | intron_cnc | 0 |  | 1 | 0.198 | NA | 4 |
| 1 | r111878424         | 2 | 144461577 | G              | GA  | 0.1371 | 2.6e-09 | 1         | r111878424         | ARHGAP15 | Transcript | INTRONIC | intron | RP11-414621.283 | Transcript | INTRONIC | intron_cnc | 0 |  | 1 | 0.185 | NA | 4 |
| 1 | r59950149          | 2 | 144296927 | GT             | G   | 0.4811 | 2.5e-21 | 0.902024  | 2.144305254 CT, C  | ARHGAP15 | Transcript | INTRONIC | intron | RP11-414621.284 | Transcript | INTRONIC | intron_cnc | 0 |  | 1 | 0.183 | NA | 5 |
| 1 | r5706665           | 2 | 14429411  | C              | G   | 0.4206 | 1.9e-09 | 0.958055  | r56151632          | ARHGAP15 | Transcript | INTRONIC | intron | RP11-414621.285 | Transcript | INTRONIC | intron_cnc | 0 |  | 1 | 0.177 | 6  | 5 |
| 1 | r5774442620        | 2 | 144300226 | A              | ATT | 0.0497 | 9.8e-16 | 1         | r774442620         | ARHGAP15 | Transcript | INTRONIC | intron | RP11-414621.286 | Transcript | INTRONIC | intron_cnc | 0 |  | 1 | 0.176 | NA | 5 |
| 1 | r4374318           | 2 | 144389671 | C              | G   | 0.1789 | 7.5e-11 | 1         | r6734367           | ARHGAP15 | Transcript | INTRONIC | intron | RP11-414621.287 | Transcript | INTRONIC | intron_cnc | 0 |  | 1 | 0.165 | 6  | 5 |
| 1 | r565651196         | 2 | 144441839 | GGCACACTCTGTAG | G   | 0.1789 | 1.6e-23 | 1         | r774442620         | ARHGAP15 | Transcript | INTRONIC | intron | RP11-414621.288 | Transcript | INTRONIC | intron_cnc | 0 |  | 1 | 0.156 | 7  | 4 |
| 1 | r5140478           | 2 | 144349478 | T              | G   | 0.1789 | 2.3e-54 | 0.917042  | r6734367           | ARHGAP15 | Transcript | INTRONIC | intron | RP11-414621.289 | Transcript | INTRONIC | intron_cnc | 0 |  | 1 | 0.137 | 6  | 4 |
| 1 | r5131326           | 2 | 144170273 | G              | A   | 0.81   | 3.4e-20 | 0.818782  | r527110833         | ARHGAP15 | Transcript | INTRONIC | intron | RP11-414621.290 | Transcript | INTRONIC | intron_cnc | 0 |  | 1 | 0.135 | 6  | 4 |
| 1 | r11894956          | 2 | 144381312 | A              | T   | 0.1789 | 2.2e-51 | 0.917042  | r6734367           | ARHGAP15 | Transcript | INTRONIC | intron | RP11-414621.291 | Transcript | INTRONIC | intron_cnc | 0 |  | 1 | 0.132 | 7  | 4 |
| 1 | r118341174         | 1 | 144421360 | A              | T   | 0.0946 | 1.9e-21 | 1         | r118341174         | ARHGAP15 | Transcript | INTRONIC | intron | RP11-414621.292 | Transcript | INTRONIC | intron_cnc | 0 |  | 1 | 0.114 | 6  | 5 |
| 1 | r5834868           | 2 | 144493827 | AT             | A   | 0.3489 | 3.1e-08 | 0.793312  | r110928197         | ARHGAP15 | Transcript | INTRONIC | intron | RP11-414621.293 | Transcript | INTRONIC | intron_cnc | 0 |  | 1 | 0.113 | NA | 4 |
| 1 | r10187118          | 2 | 14439126  | C              | G   | 0.2316 | 4.0e-09 | 0.918538  | r56151632          | ARHGAP15 | Transcript | INTRONIC | intron | RP11-414621.294 | Transcript | INTRONIC | intron_cnc | 0 |  | 1 | 0.082 | 5  | 2 |
| 1 | r55688084          | 2 | 144271545 | T              | A   | 0.4408 | 3.4e-07 | 1         | r55688084          | ARHGAP15 | Transcript | INTRONIC | intron | RP11-414621.295 | Transcript | INTRONIC | intron_cnc | 0 |  | 1 | 0.084 | 7  | 4 |
| 1 | r5749183           | 2 | 14422081  | T              | C   | 0.1571 | 3.1e-08 | 0.807716  | r6273640           | ARHGAP15 | Transcript | INTRONIC | intron | RP11-414621.296 | Transcript | INTRONIC | intron_cnc | 0 |  | 1 | 0.060 | 7  | 5 |
| 1 | r54010551          | 2 | 144310137 | G              | T   | 0.1217 | 3.3e-08 | 0.845054  | r6734367           | ARHGAP15 | Transcript | INTRONIC | intron | RP11-414621.297 | Transcript | INTRONIC | intron_cnc | 0 |  | 1 | 0.046 | 5  | 2 |
| 1 | r5706254           | 2 | 14436816  | G              | A   | 0.1521 | 6.8e-08 | 0.846002  | r6273640           | ARHGAP15 | Transcript | INTRONIC | intron | RP11-414621.298 | Transcript | INTRONIC | intron_cnc | 0 |  | 1 | 0.044 | 7  | 4 |
| 1 | 2.144341098 TG, T  | 2 | 144341098 | TG             | TG  | 0.2306 | 2.8e-09 | 0.897371  | r56151632          | ARHGAP15 | Transcript | INTRONIC | intron | RP11-414621.299 | Transcript | INTRONIC | intron_cnc | 0 |  | 1 | 0.028 | NA | 5 |

|   |                    |    |              |                   |         |            |           |            |            |            |                           |                           |                 |                 |            |            |             |             |             |             |             |             |             |       |       |    |   |
|---|--------------------|----|--------------|-------------------|---------|------------|-----------|------------|------------|------------|---------------------------|---------------------------|-----------------|-----------------|------------|------------|-------------|-------------|-------------|-------------|-------------|-------------|-------------|-------|-------|----|---|
| 3 | r781764957         | 10 | 25821815 C   | CAGCAGTCTTC0.4235 | 7.6e-19 | 0.898421   | r77077800 | GPRI58     | Transcript | INTRONIC   | intron,feature_truncation | RP11-436023.361           | Transcript      | INTRONIC        | intron,unc | 1          | GPRI58      | 3.95048e-06 | 1.51050e-05 | GPRI58      | 3.95048e-06 | 1.51050e-05 | 3           | 8.004 | NA    | 5  |   |
| 3 | 10-23816032_CAT_C  | 10 | 25816032 C   | CAT               | 0.4394  | 1.3e-22    | 0.972685  | r77077800  | GPRI58     | Transcript | INTRONIC                  | intron,feature_truncation | RP11-436023.364 | Transcript      | INTRONIC   | intron,unc | 1           | GPRI58      | 3.62414e-08 | 1.51050e-05 | GPRI58      | 3.62414e-08 | 1.51050e-05 | 3     | 7.997 | NA | 5 |
| 3 | r14203126          | 10 | 25757981 T   | C                 | 0.4642  | 1.3e-08    | 0.843173  | r8248489   | GPRI58     | Transcript | INTRONIC                  | intron                    | RP11-436023.365 | Transcript      | INTRONIC   | intron,unc | 1           | GPRI58      | 6.25301e-07 | 1.51050e-05 | GPRI58      | 6.25301e-07 | 1.51050e-05 | 3     | 7.772 | NA | 5 |
| 3 | r5761925 C         | A  | 0.16         | 1.2e-10           | 1       | r577171310 | GPRI58    | Transcript | INTRONIC   | intron     | RP11-436023.366           | Transcript                | INTRONIC        | intron,unc      | 0          | GPRI58     | 2.52228e-07 | 1.51050e-05 | GPRI58      | 2.52228e-07 | 1.51050e-05 | 3           | 7.999       | 7     | 5     |    |   |
| 3 | r4749043           | 10 | 25822360 G   | A                 | 0.3459  | 8.8e-11    | 0.792767  | r4749042   | GPRI58     | Transcript | INTRONIC                  | intron                    | RP11-436023.367 | Transcript      | INTRONIC   | intron,unc | 0           | GPRI58      | 2.52228e-07 | 1.51050e-05 | GPRI58      | 2.52228e-07 | 1.51050e-05 | 3     | 7.557 | 7  | 5 |
| 3 | r1414041           | 10 | 25851921 T   | C                 | 0.4076  | 8.7e-10    | 0.550347  | r7903204   | GPRI58     | Transcript | INTRONIC                  | intron                    | RP11-436023.368 | Transcript      | INTRONIC   | intron,unc | 0           | GPRI58      | 1.83554e-07 | 1.51050e-05 | GPRI58      | 1.83554e-07 | 1.51050e-05 | 3     | 7.446 | NA | 5 |
| 3 | 10-25820555_GTAT_G | 10 | 25820555 C   | GTAT              | 0.4274  | 6.7e-19    | 0.528023  | r77077800  | GPRI58     | Transcript | INTRONIC                  | intron,feature_truncation | RP11-436023.369 | Transcript      | INTRONIC   | intron,unc | 1           | GPRI58      | 1.83554e-07 | 1.51050e-05 | GPRI58      | 1.83554e-07 | 1.51050e-05 | 3     | 7.411 | NA | 5 |
| 3 | r57329745          | 10 | 2579885 CT   | C                 | 0.136   | 6.0e-11    | 1         | r577171310 | GPRI58     | Transcript | INTRONIC                  | intron,feature_truncation | RP11-436023.370 | Transcript      | INTRONIC   | intron,unc | 0           | GPRI58      | 7.234       | NA          | 5           |             |             |       |       |    |   |
| 3 | r75504166          | 10 | 25850451 G   | C                 | 0.137   | 1.3e-06    | 0.72239   | r7903204   | GPRI58     | Transcript | INTRONIC                  | intron,feature_truncation | RP11-436023.371 | Transcript      | INTRONIC   | intron,unc | 0           | GPRI58      | 1.34231e-09 | 1.51050e-05 | GPRI58      | 1.34231e-09 | 1.51050e-05 | 3     | 7.087 | NA | 5 |
| 3 | r4749051           | 10 | 25869789 CT  | CTTAAATA          | T       | 0.4473     | 2.4e-10   | 0.528023   | r4749042   | GPRI58     | Transcript                | INTRONIC                  | intron          | RP11-436023.372 | Transcript | INTRONIC   | intron,unc  | 0           | GPRI58      | 7.234       | NA          | 5           |             |       |       |    |   |
| 3 | 10-25698174_CTTG_C | 10 | 25698174 C   | CTTGG             | 0.1352  | 3.6e-06    | 0.751895  | r12764415  | GPRI58     | Transcript | INTRONIC                  | intron,feature_truncation | RP11-436023.373 | Transcript      | INTRONIC   | intron,unc | 0           | GPRI58      | 7.232       | NA          | 7           |             |             |       |       |    |   |
| 3 | r75919158          | 10 | 25840529 A   | C                 | 0.1867  | 4.0e-12    | 0.811438  | r7903204   | GPRI58     | Transcript | INTRONIC                  | intron                    | RP11-436023.374 | Transcript      | INTRONIC   | intron,unc | 0           | GPRI58      | 7.232       | NA          | 7           |             |             |       |       |    |   |
| 3 | r15014057          | 10 | 25830127 G   | A                 | 0.4056  | 4.3e-06    | 0.740488  | r1029179   | GPRI58     | Transcript | INTRONIC                  | intron                    | RP11-436023.375 | Transcript      | INTRONIC   | intron,unc | 0           | GPRI58      | 7.232       | NA          | 7           |             |             |       |       |    |   |
| 3 | r11818706          | 10 | 25883475 T   | C                 | 0.1799  | 3.7e-06    | 0.759262  | r4749042   | GPRI58     | Transcript | INTRONIC                  | intron                    | RP11-436023.376 | Transcript      | INTRONIC   | intron,unc | 0           | GPRI58      | 7.134       | NA          | 6           |             |             |       |       |    |   |
| 3 | r11303614          | 10 | 25753801 A   | C                 | 0.1763  | 3.6e-07    | 0.861567  | r8248489   | GPRI58     | Transcript | INTRONIC                  | intron                    | RP11-436023.377 | Transcript      | INTRONIC   | intron,unc | 0           | GPRI58      | 1.34231e-09 | 1.51050e-05 | GPRI58      | 1.34231e-09 | 1.51050e-05 | 3     | 6.952 | 6  | 9 |
| 3 | r11014646          | 10 | 25716511 G   | T                 | 0.1352  | 4.8e-06    | 0.751895  | r12764415  | GPRI58     | Transcript | INTRONIC                  | intron                    | RP11-436023.378 | Transcript      | INTRONIC   | intron,unc | 0           | GPRI58      | 5.08301e-09 | 1.51050e-05 | GPRI58      | 5.08301e-09 | 1.51050e-05 | 3     | 6.828 | NA | 5 |
| 3 | r15837174          | 10 | 25840529 A   | C                 | 0.137   | 2.1e-06    | 0.72239   | r7903204   | GPRI58     | Transcript | INTRONIC                  | intron,feature_truncation | RP11-436023.379 | Transcript      | INTRONIC   | intron,unc | 0           | GPRI58      | 6.725       | NA          | 7           |             |             |       |       |    |   |
| 3 | r11014610          | 10 | 25855809 A   | T                 | 0.4245  | 1.3e-11    | 0.964418  | r7903204   | GPRI58     | Transcript | INTRONIC                  | intron                    | RP11-436023.381 | Transcript      | INTRONIC   | intron,unc | 0           | GPRI58      | 6.721       | NA          | 5           |             |             |       |       |    |   |
| 3 | r11373212          | 10 | 25788138 CA  | C                 | 0.3748  | 4.1e-12    | 0.939739  | r4749042   | GPRI58     | Transcript | INTRONIC                  | intron,feature_truncation | RP11-436023.382 | Transcript      | INTRONIC   | intron,unc | 1           | GPRI58      | 4.4196e-07  | 1.51050e-05 | GPRI58      | 4.4196e-07  | 1.51050e-05 | 3     | 6.697 | NA | 5 |
| 3 | r1524588           | 10 | 25752008 A   | G                 | 0.407   | 9.1e-09    | 0.564711  | r8248489   | GPRI58     | Transcript | INTRONIC                  | intron                    | RP11-436023.383 | Transcript      | INTRONIC   | intron,unc | 0           | GPRI58      | 2.15921e-07 | 1.51050e-05 | GPRI58      | 2.15921e-07 | 1.51050e-05 | 3     | 6.627 | NA | 5 |
| 3 | r150828830         | 10 | 25863763 A   | G                 | 0.4284  | 6.5e-09    | 0.592026  | r34874972  | GPRI58     | Transcript | INTRONIC                  | intron                    | RP11-436023.384 | Transcript      | INTRONIC   | intron,unc | 0           | GPRI58      | 6.620       | NA          | 5           |             |             |       |       |    |   |
| 3 | r388833253         | 10 | 25863075 C   | CAAAA             | 0.3151  | 1.7e-08    | 1         | r38833253  | GPRI58     | Transcript | INTRONIC                  | intron,feature_truncation | RP11-436023.385 | Transcript      | INTRONIC   | intron,unc | 0           | GPRI58      | 6.608       | NA          | 5           |             |             |       |       |    |   |
| 3 | r11014621          | 10 | 25855432 G   | A                 | 0.338   | 2.2e-06    | 0.755515  | r7903204   | GPRI58     | Transcript | INTRONIC                  | intron                    | RP11-436023.386 | Transcript      | INTRONIC   | intron,unc | 0           | GPRI58      | 6.412       | NA          | 7           |             |             |       |       |    |   |
| 3 | r11014654          | 10 | 25732995 G   | T                 | 0.165   | 1.0e-08    | 0.524635  | r12764415  | GPRI58     | Transcript | INTRONIC                  | intron                    | RP11-436023.387 | Transcript      | INTRONIC   | intron,unc | 0           | GPRI58      | 6.239       | NA          | 4           |             |             |       |       |    |   |
| 3 | r15773837          | 10 | 25766964 A   | G                 | 0.499   | 8.0e-09    | 0.594813  | r8248489   | GPRI58     | Transcript | INTRONIC                  | intron                    | RP11-436023.388 | Transcript      | INTRONIC   | intron,unc | 1           | GPRI58      | 9.56353e-08 | 1.51050e-05 | GPRI58      | 9.56353e-08 | 1.51050e-05 | 3     | 5.867 | 7  | 5 |
| 3 | r15703526          | 10 | 25764346 A   | T                 | 0.16    | 1.7e-10    | 1         | r577171310 | GPRI58     | Transcript | INTRONIC                  | intron                    | RP11-436023.389 | Transcript      | INTRONIC   | intron,unc | 0           | GPRI58      | 5.808       | NA          | 7           |             |             |       |       |    |   |
| 3 | r150741092         | 10 | 25814527 T   | G                 | 0.3608  | 2.3e-13    | 0.898982  | r4749042   | GPRI58     | Transcript | INTRONIC                  | intron                    | RP11-436023.390 | Transcript      | INTRONIC   | intron,unc | 1           | GPRI58      | 1.05109e-08 | 1.51050e-05 | GPRI58      | 1.05109e-08 | 1.51050e-05 | 3     | 5.716 | 7  | 5 |
| 3 | r4749040           | 10 | 25787775 G   | G                 | 0.4364  | 1.4e-18    | 0.845856  | r77077800  | GPRI58     | Transcript | INTRONIC                  | intron                    | RP11-436023.391 | Transcript      | INTRONIC   | intron,unc | 1           | GPRI58      | 1.14208e-06 | 1.51050e-05 | GPRI58      | 1.14208e-06 | 1.51050e-05 | 3     | 5.607 | 5  | 5 |
| 3 | r150600135         | 10 | 25848080 A   | C                 | 0.4239  | 3.2e-06    | 0.718818  | r12764415  | GPRI58     | Transcript | INTRONIC                  | intron                    | RP11-436023.392 | Transcript      | INTRONIC   | intron,unc | 0           | GPRI58      | 5.460       | NA          | 5           |             |             |       |       |    |   |
| 3 | r150828808         | 10 | 25732083 A   | A                 | 0.161   | 3.3e-08    | 0.511558  | r12764415  | GPRI58     | Transcript | INTRONIC                  | intron                    | RP11-436023.393 | Transcript      | INTRONIC   | intron,unc | 0           | GPRI58      | 5.457       | NA          | 7           |             |             |       |       |    |   |
| 3 | r11014652          | 10 | 25732966 G   | A                 | 0.1412  | 4.0e-08    | 0.824647  | r12764415  | GPRI58     | Transcript | INTRONIC                  | intron                    | RP11-436023.394 | Transcript      | INTRONIC   | intron,unc | 0           | GPRI58      | 5.453       | NA          | 5           |             |             |       |       |    |   |
| 3 | r48030706          | 10 | 25767790 G   | C                 | 0.408   | 3.7e-09    | 0.838951  | r8248489   | GPRI58     | Transcript | INTRONIC                  | intron                    | RP11-436023.395 | Transcript      | INTRONIC   | intron,unc | 0           | GPRI58      | 5.450       | NA          | 6           |             |             |       |       |    |   |
| 3 | r15605578          | 10 | 25851267 A   | T                 | 0.128   | 3.8e-08    | 0.820258  | r7903204   | GPRI58     | Transcript | INTRONIC                  | intron                    | RP11-436023.396 | Transcript      | INTRONIC   | intron,unc | 0           | GPRI58      | 5.450       | NA          | 6           |             |             |       |       |    |   |
| 3 | 10-25791541_CA_C   | 10 | 25791541 C   | CA                | 0.3718  | 7.4e-12    | 0.936418  | r4749042   | GPRI58     | Transcript | INTRONIC                  | intron,feature_truncation | RP11-436023.397 | Transcript      | INTRONIC   | intron,unc | 1           | GPRI58      | 3.23567e-09 | 1.51050e-05 | GPRI58      | 3.23567e-09 | 1.51050e-05 | 3     | 5.399 | NA | 5 |
| 3 | r17474938          | 10 | 25814587 G   | G                 | 0.4801  | 2.8e-20    | 0.840593  | r7902592   | GPRI58     | Transcript | INTRONIC                  | intron                    | RP11-436023.398 | Transcript      | INTRONIC   | intron,unc | 1           | GPRI58      | 8.74988e-07 | 1.51050e-05 | GPRI58      | 8.74988e-07 | 1.51050e-05 | 3     | 5.216 | 7  | 5 |
| 3 | r57764895          | 10 | 25764006 T   | C                 | 0.1342  | 8.2e-08    | 0.813303  | r577171310 | GPRI58     | Transcript | INTRONIC                  | intron                    | RP11-436023.399 | Transcript      | INTRONIC   | intron,unc | 1           | GPRI58      | 2.38073e-06 | 1.51050e-05 | GPRI58      | 2.38073e-06 | 1.51050e-05 | 3     | 5.066 | NA | 5 |
| 3 | r138443630         | 10 | 25775741 CTT | C                 | 0.5     | 1.6e-08    | 0.518256  | r8248489   | GPRI58     | Transcript | INTRONIC                  | intron,feature_truncation | RP11-436023.400 | Transcript      | INTRONIC   | intron,unc | 0           | GPRI58      | 5.066       | NA          | 5           |             |             |       |       |    |   |
| 3 | r201594206         | 10 | 25779908 G   | T                 | 0.1581  | 3.2e-11    | 1         | r20154206  | GPRI58     | Transcript | INTRONIC                  | intron                    | RP11-436023.401 | Transcript      | INTRONIC   | intron,unc | 0           | GPRI58      | 5.062       | NA          | 5           |             |             |       |       |    |   |
| 3 | r11014554          | 10 | 25724393     | A                 | 0.1352  | 6.7e-06    | 0.751895  | r12764415  | GPRI58     | Transcript | INTRONIC                  | intron                    | RP11-436023.402 | Transcript      | INTRONIC   | intron,unc | 0           | GPRI58      | 4.967       | NA          | 5           |             |             |       |       |    |   |
| 3 | r9299793           | 10 | 25875717 G   | A                 | 0.4722  | 2.6e-12    | 0.823293  | r34874972  | GPRI58     | Transcript | INTRONIC                  | intron                    | RP11-436023.403 | Transcript      | INTRONIC   | intron,unc | 0           | GPRI58      | 4.960       | NA          | 8           |             |             |       |       |    |   |
| 3 | r67296777          | 10 | 25714319 G   | C                 | 0.1352  | 5.6e-06    | 0.740308  | r12764415  | GPRI58     | Transcript | INTRONIC                  | intron                    | RP11-436023.404 | Transcript      | INTRONIC   | intron,unc | 0           | GPRI58      | 4.787       | NA          | 7           |             |             |       |       |    |   |
| 3 | r67296777          | 10 | 25729679 T   | C                 | 0.1342  | 7.2e-09    | 0.833303  | r577171310 | GPRI58     | Transcript | INTRONIC                  | intron                    | RP11-436023.405 | Transcript      | INTRONIC   | intron,unc | 0           | GPRI58      | 4.760       | NA          | 7           |             |             |       |       |    |   |
| 3 | r8074889           | 10 | 25786852 G   | C                 | 0.4503  | 5.7e-19    | 0.806503  | r77077800  | GPRI58     | Transcript | INTRONIC                  | intron                    | RP11-436023.406 | Transcript      | INTRONIC   | intron,unc | 0           | GPRI58      | 4.718       | NA          | 5           |             |             |       |       |    |   |
| 3 | r11014565          | 10 | 25715319 A   | G                 | 0.2018  | 2.3e-06    | 0.786777  | r12764415  | GPRI58     | Transcript | INTRONIC                  | intron                    | RP11-436023.407 | Transcript      | INTRONIC   | intron,unc | 0           | GPRI58      | 4.687       | NA          | 1           |             |             |       |       |    |   |
| 3 | r7903136           | 10 | 25847978     | A                 | 0.4006  | 7.8e-11    | 0.534773  | r7903204   | GPRI58     | Transcript | INTRONIC                  | intron                    | RP11-436023.408 | Transcript      | INTRONIC   | intron,unc | 0           | GPRI58      | 4.683       | NA          | 7           |             |             |       |       |    |   |
| 3 | r7100629           | 10 | 25834924 A   | T                 | 0.4205  | 3.4e-12    | 0.948192  | r7903204   | GPRI58     | Transcript | INTRONIC                  | intron                    | RP11-436023.409 | Transcript      | INTRONIC   | intron,unc | 0           | GPRI58      | 4.672       | NA          | 5           |             |             |       |       |    |   |
| 3 | r4749018           | 10 | 25769799 G   | A                 | 0.4513  | 1.3e-18    | 0.810639  | r77077800  | GPRI58     | Transcript | INTRONIC                  | intron                    | RP11-436023.410 | Transcript      | INTRONIC   | intron,unc | 0           | GPRI58      | 7.0251e-07  | 1.51050e-05 | GPRI58      | 7.0251e-07  | 1.51050e-05 | 3     | 4.662 | 7  | 5 |
| 3 | r15105086          | 10 | 25764521 A   | T                 | 0.16    | 1.4e-10    | 1         | r577171310 | GPRI58     | Transcript | INTRONIC                  | intron                    | RP11-436023.411 | Transcript      | INTRONIC   | intron,unc | 0           | GPRI58      | 4.662       | NA          | 5           |             |             |       |       |    |   |
| 3 | r110082439         | 10 | 25832211 G   | A                 | 0.3976  | 1.4e-11    | 0.861839  | r7903204   | GPRI58     | Transcript | INTRONIC                  | intron                    | RP11-436023.412 | Transcript      | INTRONIC   | intron,unc | 0           | GPRI58      | 4.550       | NA          | 5           |             |             |       |       |    |   |
| 3 | r12780734          | 10 | 25847609 G   | A                 | 0.189   | 2.3e-06    | 0.788655  | r7903204   | GPRI58     | Transcript | INTRONIC                  | intron                    | RP11-436023.413 | Transcript      | INTRONIC   | intron,unc | 0           | GPRI58      | 4.550       | NA          | 5           |             |             |       |       |    |   |
| 3 | r7903204           | 10 | 25847680 A   | C                 | 0.1175  | 8.1e-11    | 1         | r7903204   | GPRI58     | Transcript | INTRONIC                  | intron                    | RP11-436023.414 | Transcript      | INTRONIC   | intron,unc | 0           | GPRI58      | 4.476       | NA          | 5           |             |             |       |       |    |   |
| 3 | r4747524           | 10 | 25788015 C   | A                 | 0.4364  | 1.4e-18    | 0.845856  | r77077800  | GPRI58     | Transcript | INTRON                    |                           |                 |                 |            |            |             |             |             |             |             |             |             |       |       |    |   |

|   |                |    |             |    |        |          |          |                |        |            |          |        |               |            |          |          |   |        |             |            |        |             |            |   |       |    |   |
|---|----------------|----|-------------|----|--------|----------|----------|----------------|--------|------------|----------|--------|---------------|------------|----------|----------|---|--------|-------------|------------|--------|-------------|------------|---|-------|----|---|
| 3 | r1528865       | 10 | 25782764 C  | T  | 0.4732 | 1.5e-08  | 0.75677  | r824859        | GPRI58 | Transcript | INTRONIC | intron | RP11-43621488 | Transcript | INTRONIC | intronic | 1 | GPRI58 | 5.47339e-08 | 1.5105e-05 | GPRI58 | 5.47339e-08 | 1.5105e-05 | 3 | 2.587 | NA | 1 |
| 3 | r15101447      | 10 | 25717594 T  | C  | 0.1352 | 6.4e-06  | 0.751895 | r12764415      | GPRI58 | Transcript | INTRONIC | intron | RP11-43621488 | Transcript | INTRONIC | intronic | 0 | GPRI58 | 3.9004e-06  | 1.5105e-05 | GPRI58 | 3.9004e-06  | 1.5105e-05 | 3 | 2.560 | 6  | 9 |
| 3 | r5784736       | 10 | 25821793 G  | A  | 0.4235 | 6.8e-10  | 0.88642  | r7077800       | GPRI58 | Transcript | INTRONIC | intron | RP11-43621488 | Transcript | INTRONIC | intronic | 0 | GPRI58 | 3.9004e-06  | 1.5105e-05 | GPRI58 | 3.9004e-06  | 1.5105e-05 | 3 | 2.550 | 6  | 9 |
| 3 | r6482488       | 10 | 25796182 C  | T  | 0.4821 | 1.1e-16  | 0.94204  | r5708292       | GPRI58 | Transcript | INTRONIC | intron | RP11-43621488 | Transcript | INTRONIC | intronic | 1 | GPRI58 | 1.73728e-05 | 1.5105e-05 | GPRI58 | 1.73728e-05 | 1.5105e-05 | 3 | 2.545 | 7  | 5 |
| 3 | r57005382      | 10 | 25786532 A  | G  | 0.4742 | 1.1e-08  | 0.75677  | r824859        | GPRI58 | Transcript | INTRONIC | intron | RP11-43621488 | Transcript | INTRONIC | intronic | 1 | GPRI58 | 2.2660e-08  | 1.5105e-05 | GPRI58 | 2.2660e-08  | 1.5105e-05 | 3 | 2.538 | NA | 5 |
| 3 | r151015483     | 10 | 25713841 C  | T  | 0.1352 | 3.3e-06  | 0.751895 | r12764415      | GPRI58 | Transcript | INTRONIC | intron | RP11-43621488 | Transcript | INTRONIC | intronic | 0 | GPRI58 | 3.9004e-06  | 1.5105e-05 | GPRI58 | 3.9004e-06  | 1.5105e-05 | 3 | 2.524 | NA | 5 |
| 3 | r15028450      | 10 | 25832059 A  | T  | 0.3708 | 3.1e-10  | 0.72964  | r7903204       | GPRI58 | Transcript | INTRONIC | intron | RP11-43621488 | Transcript | INTRONIC | intronic | 0 | GPRI58 | 1.67232e-06 | 1.5105e-05 | GPRI58 | 1.67232e-06 | 1.5105e-05 | 3 | 2.518 | 6  | 5 |
| 3 | r980380        | 10 | 25827393 A  | G  | 0.1311 | 1.3e-06  | 0.851269 | r7903204       | GPRI58 | Transcript | INTRONIC | intron | RP11-43621488 | Transcript | INTRONIC | intronic | 0 | GPRI58 | 1.67232e-06 | 1.5105e-05 | GPRI58 | 1.67232e-06 | 1.5105e-05 | 3 | 2.440 | NA | 5 |
| 3 | r1276816       | 10 | 25761511 T  | T  | 0.1342 | 7.1e-09  | 0.813053 | r57717130      | GPRI58 | Transcript | INTRONIC | intron | RP11-43621488 | Transcript | INTRONIC | intronic | 0 | GPRI58 | 1.67232e-06 | 1.5105e-05 | GPRI58 | 1.67232e-06 | 1.5105e-05 | 3 | 2.430 | 6  | 7 |
| 3 | r151014659     | 10 | 25731702 T  | C  | 0.361  | 3.5e-08  | 0.911668 | r12764415      | GPRI58 | Transcript | INTRONIC | intron | RP11-43621488 | Transcript | INTRONIC | intronic | 0 | GPRI58 | 3.9004e-06  | 1.5105e-05 | GPRI58 | 3.9004e-06  | 1.5105e-05 | 3 | 2.386 | 7  | 5 |
| 3 | r12770990      | 10 | 25734142 C  | T  | 0.36   | 1.6e-09  | 0.935356 | r12764415      | GPRI58 | Transcript | INTRONIC | intron | RP11-43621488 | Transcript | INTRONIC | intronic | 0 | GPRI58 | 3.9004e-06  | 1.5105e-05 | GPRI58 | 3.9004e-06  | 1.5105e-05 | 3 | 2.306 | 6  | 9 |
| 3 | r6484290       | 10 | 25821294 T  | C  | 0.4235 | 4.3e-10  | 0.88642  | r7077800       | GPRI58 | Transcript | INTRONIC | intron | RP11-43621488 | Transcript | INTRONIC | intronic | 0 | GPRI58 | 3.9004e-06  | 1.5105e-05 | GPRI58 | 3.9004e-06  | 1.5105e-05 | 3 | 2.275 | 6  | 9 |
| 3 | r64545439      | 10 | 25743127 C  | C  | 0.1322 | 1.9e-09  | 0.771189 | r57717130      | GPRI58 | Transcript | INTRONIC | intron | RP11-43621488 | Transcript | INTRONIC | intronic | 0 | GPRI58 | 3.9004e-06  | 1.5105e-05 | GPRI58 | 3.9004e-06  | 1.5105e-05 | 3 | 2.283 | 7  | 5 |
| 3 | r10282807      | 10 | 25731823 T  | C  | 0.361  | 3.5e-08  | 0.911668 | r12764415      | GPRI58 | Transcript | INTRONIC | intron | RP11-43621488 | Transcript | INTRONIC | intronic | 0 | GPRI58 | 3.9004e-06  | 1.5105e-05 | GPRI58 | 3.9004e-06  | 1.5105e-05 | 3 | 2.267 | 7  | 9 |
| 3 | r1512355       | 10 | 25781407 A  | T  | 0.4742 | 2.1e-08  | 0.75677  | r824859        | GPRI58 | Transcript | INTRONIC | intron | RP11-43621488 | Transcript | INTRONIC | intronic | 0 | GPRI58 | 3.9004e-06  | 1.5105e-05 | GPRI58 | 3.9004e-06  | 1.5105e-05 | 3 | 2.183 | NA | 5 |
| 3 | r7888963       | 10 | 25884742 G  | A  | 0.1789 | 4.9e-06  | 0.751996 | r12268257      | GPRI58 | Transcript | INTRONIC | intron | RP11-43621488 | Transcript | INTRONIC | intronic | 0 | GPRI58 | 3.9004e-06  | 1.5105e-05 | GPRI58 | 3.9004e-06  | 1.5105e-05 | 3 | 2.167 | 6  | 5 |
| 3 | r12018916      | 10 | 25831999 T  | C  | 0.4205 | 3.6e-12  | 0.948182 | r7903204       | GPRI58 | Transcript | INTRONIC | intron | RP11-43621488 | Transcript | INTRONIC | intronic | 0 | GPRI58 | 3.9004e-06  | 1.5105e-05 | GPRI58 | 3.9004e-06  | 1.5105e-05 | 3 | 2.162 | 7  | 5 |
| 3 | r15121552      | 10 | 25735153 C  | T  | 0.1403 | 8.8e-09  | 0.845532 | r57717130      | GPRI58 | Transcript | INTRONIC | intron | RP11-43621488 | Transcript | INTRONIC | intronic | 0 | GPRI58 | 3.9004e-06  | 1.5105e-05 | GPRI58 | 3.9004e-06  | 1.5105e-05 | 3 | 2.149 | 7  | 5 |
| 3 | 10-25911676_GT | 10 | 25911676 G  | GT | 0.2356 | 1.6e-09  | 1        | 10-25911676_GT | GPRI58 | Transcript | INTRONIC | intron | RP11-43621488 | Transcript | INTRONIC | intronic | 0 | GPRI58 | 3.9004e-06  | 1.5105e-05 | GPRI58 | 3.9004e-06  | 1.5105e-05 | 3 | 2.085 | NA | 9 |
| 3 | r83488146      | 10 | 25746371 CT | C  | 0.1372 | 3.9e-09  | 0.748853 | r57717130      | GPRI58 | Transcript | INTRONIC | intron | RP11-43621488 | Transcript | INTRONIC | intronic | 1 | GPRI58 | 3.8564e-08  | 1.5105e-05 | GPRI58 | 3.8564e-08  | 1.5105e-05 | 3 | 2.082 | NA | 5 |
| 3 | r57048226      | 10 | 25772005 A  | G  | 0.1581 | 5.6e-10  | 0.86871  | r57721210      | GPRI58 | Transcript | INTRONIC | intron | RP11-43621488 | Transcript | INTRONIC | intronic | 0 | GPRI58 | 3.9004e-06  | 1.5105e-05 | GPRI58 | 3.9004e-06  | 1.5105e-05 | 3 | 2.052 | 5  | 5 |
| 3 | r5097800       | 10 | 25786532 G  | A  | 0.4801 | 2.1e-13  | 0.936684 | r7077800       | GPRI58 | Transcript | INTRONIC | intron | RP11-43621488 | Transcript | INTRONIC | intronic | 1 | GPRI58 | 2.52567e-06 | 1.5105e-05 | GPRI58 | 2.52567e-06 | 1.5105e-05 | 3 | 2.037 | 5  | 5 |
| 3 | r12259686      | 10 | 25699841 C  | T  | 0.1352 | 3.9e-06  | 0.751895 | r12764415      | GPRI58 | Transcript | INTRONIC | intron | RP11-43621488 | Transcript | INTRONIC | intronic | 0 | GPRI58 | 3.9004e-06  | 1.5105e-05 | GPRI58 | 3.9004e-06  | 1.5105e-05 | 3 | 2.013 | 6  | 4 |
| 3 | r25055658      | 10 | 25903965 C  | A  | 0.1799 | 3.7e-06  | 0.759262 | r12268257      | GPRI58 | Transcript | INTRONIC | intron | RP11-43621488 | Transcript | INTRONIC | intronic | 0 | GPRI58 | 3.9004e-06  | 1.5105e-05 | GPRI58 | 3.9004e-06  | 1.5105e-05 | 3 | 1.969 | NA | 9 |
| 3 | r5005591       | 10 | 25776176 G  | A  | 0.492  | 1.3e-08  | 0.950244 | r824859        | GPRI58 | Transcript | INTRONIC | intron | RP11-43621488 | Transcript | INTRONIC | intronic | 1 | GPRI58 | 2.1241e-07  | 1.5105e-05 | GPRI58 | 2.1241e-07  | 1.5105e-05 | 3 | 1.968 | NA | 5 |
| 3 | r50764543      | 10 | 25699291 C  | T  | 0.1352 | 4.9e-06  | 0.751895 | r12764415      | GPRI58 | Transcript | INTRONIC | intron | RP11-43621488 | Transcript | INTRONIC | intronic | 0 | GPRI58 | 3.9004e-06  | 1.5105e-05 | GPRI58 | 3.9004e-06  | 1.5105e-05 | 3 | 1.965 | 5  | 7 |
| 3 | r150283816     | 10 | 25821273 G  | A  | 0.4463 | 9.1e-12  | 1        | r7077800       | GPRI58 | Transcript | INTRONIC | intron | RP11-43621488 | Transcript | INTRONIC | intronic | 0 | GPRI58 | 1.1388e-07  | 1.5105e-05 | GPRI58 | 1.1388e-07  | 1.5105e-05 | 3 | 1.917 | 29 | 5 |
| 3 | r64747531      | 10 | 25865513 A  | G  | 0.338  | 4.3e-06  | 0.704343 | r7903204       | GPRI58 | Transcript | INTRONIC | intron | RP11-43621488 | Transcript | INTRONIC | intronic | 0 | GPRI58 | 1.1388e-07  | 1.5105e-05 | GPRI58 | 1.1388e-07  | 1.5105e-05 | 3 | 1.917 | 7  | 5 |
| 3 | r25987363      | 10 | 25773608 A  | G  | 0.5    | 1.6e-08  | 0.938256 | r824859        | GPRI58 | Transcript | INTRONIC | intron | RP11-43621488 | Transcript | INTRONIC | intronic | 1 | GPRI58 | 1.47901e-07 | 1.5105e-05 | GPRI58 | 1.47901e-07 | 1.5105e-05 | 3 | 1.903 | 6  | 5 |
| 3 | r7089916       | 10 | 258219642   | CT | 0.4235 | 1.9e-09  | 0.86871  | r7077800       | GPRI58 | Transcript | INTRONIC | intron | RP11-43621488 | Transcript | INTRONIC | intronic | 1 | GPRI58 | 7.0997e-06  | 1.5105e-05 | GPRI58 | 7.0997e-06  | 1.5105e-05 | 3 | 1.897 | 6  | 9 |
| 3 | r15031889      | 10 | 25821234 TG | T  | 0.4463 | 1.2e-21  | 1        | r7077800       | GPRI58 | Transcript | INTRONIC | intron | RP11-43621488 | Transcript | INTRONIC | intronic | 1 | GPRI58 | 1.7746e-07  | 1.5105e-05 | GPRI58 | 1.7746e-07  | 1.5105e-05 | 3 | 1.855 | NA | 5 |
| 3 | r15135158      | 10 | 25838771 T  | C  | 0.136  | 9.5e-07  | 0.759261 | r7903204       | GPRI58 | Transcript | INTRONIC | intron | RP11-43621488 | Transcript | INTRONIC | intronic | 0 | GPRI58 | 1.47901e-07 | 1.5105e-05 | GPRI58 | 1.47901e-07 | 1.5105e-05 | 3 | 1.848 | NA | 5 |
| 3 | r15130123      | 10 | 25773094 G  | T  | 0.1    | 1.27e-08 | 0.748853 | r824859        | GPRI58 | Transcript | INTRONIC | intron | RP11-43621488 | Transcript | INTRONIC | intronic | 0 | GPRI58 | 3.9004e-06  | 1.5105e-05 | GPRI58 | 3.9004e-06  | 1.5105e-05 | 3 | 1.842 | NA | 5 |
| 3 | r5708916       | 10 | 25815785 GA | G  | 0.4245 | 1.9e-10  | 0.86843  | r7903204       | GPRI58 | Transcript | INTRONIC | intron | RP11-43621488 | Transcript | INTRONIC | intronic | 0 | GPRI58 | 3.9004e-06  | 1.5105e-05 | GPRI58 | 3.9004e-06  | 1.5105e-05 | 3 | 1.842 | NA | 5 |
| 3 | r12334847      | 10 | 25699776 C  | T  | 0.1352 | 3.1e-06  | 0.751895 | r12764415      | GPRI58 | Transcript | INTRONIC | intron | RP11-43621488 | Transcript | INTRONIC | intronic | 0 | GPRI58 | 3.9004e-06  | 1.5105e-05 | GPRI58 | 3.9004e-06  | 1.5105e-05 | 3 | 1.813 | 6  | 4 |
| 3 | r7808793       | 10 | 25917499 G  | A  | 0.1859 | 1.3e-06  | 0.731673 | r12268257      | GPRI58 | Transcript | INTRONIC | intron | RP11-43621488 | Transcript | INTRONIC | intronic | 0 | GPRI58 | 3.9004e-06  | 1.5105e-05 | GPRI58 | 3.9004e-06  | 1.5105e-05 | 3 | 1.810 | 7  | 5 |
| 3 | r15040348      | 10 | 2574587 A   | C  | 0.4897 | 6.1e-09  | 0.86871  | r824859        | GPRI58 | Transcript | INTRONIC | intron | RP11-43621488 | Transcript | INTRONIC | intronic | 0 | GPRI58 | 3.9004e-06  | 1.5105e-05 | GPRI58 | 3.9004e-06  | 1.5105e-05 | 3 | 1.808 | NA | 9 |
| 3 | r7804979       | 10 | 25760600 A  | G  | 0.16   | 1.7e-10  | 1        | r57717130      | GPRI58 | Transcript | INTRONIC | intron | RP11-43621488 | Transcript | INTRONIC | intronic | 0 | GPRI58 | 3.9004e-06  | 1.5105e-05 | GPRI58 | 3.9004e-06  | 1.5105e-05 | 3 | 1.798 | 6  | 5 |
| 3 | r15101495      | 10 | 25810281 A  | G  | 0.3777 | 1.7e-15  | 0.829634 | r824859        | GPRI58 | Transcript | INTRONIC | intron | RP11-43621488 | Transcript | INTRONIC | intronic | 0 | GPRI58 | 2.41204e-09 | 1.5105e-05 | GPRI58 | 2.41204e-09 | 1.5105e-05 | 3 | 1.794 | 7  | 5 |
| 3 | r57279639      | 10 | 25861392 G  | A  | 0.4294 | 5.5e-09  | 0.936624 | r824859        | GPRI58 | Transcript | INTRONIC | intron | RP11-43621488 | Transcript | INTRONIC | intronic | 0 | GPRI58 | 2.41204e-09 | 1.5105e-05 | GPRI58 | 2.41204e-09 | 1.5105e-05 | 3 | 1.794 | 7  | 5 |
| 3 | r696296        | 10 | 25821826 G  | A  | 0.4463 | 1.8e-21  | 1        | r7077800       | GPRI58 | Transcript | INTRONIC | intron | RP11-43621488 | Transcript | INTRONIC | intronic | 1 | GPRI58 | 6.14784e-08 | 1.5105e-05 | GPRI58 | 6.14784e-08 | 1.5105e-05 | 3 | 1.768 | NA | 5 |
| 3 | r7913189       | 10 | 2584491 G   | C  | 0.4225 | 1.1e-11  | 0.956265 | r7903204       | GPRI58 | Transcript | INTRONIC | intron | RP11-43621488 | Transcript | INTRONIC | intronic | 0 | GPRI58 | 3.9004e-06  | 1.5105e-05 | GPRI58 | 3.9004e-06  | 1.5105e-05 | 3 | 1.748 | 7  | 5 |
| 3 | r15140931      | 10 | 25874085 A  | T  | 0.498  | 5.4e-09  | 0.936919 | r824859        | GPRI58 | Transcript | INTRONIC | intron | RP11-43621488 | Transcript | INTRONIC | intronic | 0 | GPRI58 | 1.34261e-07 | 1.5105e-05 | GPRI58 | 1.34261e-07 | 1.5105e-05 | 3 | 1.748 | 7  | 5 |
| 3 | r10282818      | 10 | 25836095 T  | C  | 0.4215 | 3.4e-12  | 0.95632  | r7903204       | GPRI58 | Transcript | INTRONIC | intron | RP11-43621488 | Transcript | INTRONIC | intronic | 0 | GPRI58 | 3.9004e-06  | 1.5105e-05 | GPRI58 | 3.9004e-06  | 1.5105e-05 | 3 | 1.725 | 6  | 1 |
| 3 | r1581117       | 10 | 25834481 C  | T  | 0.4205 | 3.2e-12  |          |                |        |            |          |        |               |            |          |          |   |        |             |            |        |             |            |   |       |    |   |

[illegible]



|   |                   |   |              |         |         |         |          |                             |              |                   |            |            |                 |            |          |          |   |  |  |    |   |            |             |          |            |             |          |  |
|---|-------------------|---|--------------|---------|---------|---------|----------|-----------------------------|--------------|-------------------|------------|------------|-----------------|------------|----------|----------|---|--|--|----|---|------------|-------------|----------|------------|-------------|----------|--|
| 5 | rs7498797         | 2 | 56189500 T   | C       | 0.1708  | 2.7e-06 | 0.758918 | 2.56191019_TA_T             | RP11-48113.1 | Transcript        | INTRONIC   | intronic   | RP11-436021.726 | Transcript | INTRONIC | intronic | 0 |  |  |    | 5 | 6.319      | 7           | 5        |            |             |          |  |
| 5 | rs1897478         | 2 | 56201771 T   | C       | 0.3956  | 2.6e-06 | 0.839388 | 2.56191019_TA_T             | AC011306.2   | Transcript        | INTRONIC   | intronic   | RP11-436021.727 | Transcript | INTRONIC | intronic | 0 |  |  |    | 5 | 6.165      | 7           | 5        |            |             |          |  |
| 5 | rs7504347         | 2 | 56187437 G   | T       | 0.3499  | 2.5e-06 | 0.84082  | 2.56191019_TA_T             | RP11-48113.1 | Transcript        | INTRONIC   | intronic   | RP11-436021.728 | Transcript | INTRONIC | intronic | 0 |  |  |    | 5 | 5.972      | 7           | 5        |            |             |          |  |
| 5 | 2.56027013_CAAACA | 2 | 56027013 C   | CAAAACA | 0.3588  | 3.7e-06 | 0.762261 | rs1125608                   |              | Intergenic        | INTERGENIC | intergenic | RP11-436021.730 | Transcript | INTRONIC | intronic | 0 |  |  |    | 5 | 5.763      | NA          | 14       |            |             |          |  |
| 5 | rs1394045         | 2 | 56034835 G   | A       | 0.2078  | 2.6e-06 | 0.818389 | rs5985551                   |              | Intergenic        | INTERGENIC | intergenic | RP11-436021.730 | Transcript | INTRONIC | intronic | 0 |  |  |    | 1 | 5.110      | 7           | 5        |            |             |          |  |
| 5 | rs6215788         | 2 | 56035186 A   | C       | 0.2127  | 3.7e-06 | 0.805491 | rs5985551                   |              | Intergenic        | INTERGENIC | intergenic | RP11-436021.731 | Transcript | INTRONIC | intronic | 0 |  |  |    | 1 | 5.100      | 7           | 5        |            |             |          |  |
| 5 | rs233964          | 2 | 56134947 C   | T       | 0.1083  | 3.7e-06 | 0.720693 | 2.56116193_TTGATCTCTGEEFMP1 |              | Transcript        | INTRONIC   | intron     | RP11-436021.732 | Transcript | INTRONIC | intronic | 0 |  |  |    | 5 | 4.926      | 7           | 4        |            |             |          |  |
| 5 | rs1897112         | 2 | 56115448 C   | A       | 0.2127  | 2.7e-06 | 0.779177 | rs5985551                   | EFEMP1       | Transcript        | INTRONIC   | intron     | RP11-436021.733 | Transcript | INTRONIC | intronic | 0 |  |  |    | 5 | 4.746      | 3a          | 5        |            |             |          |  |
| 5 | rs6082446         | 2 | 56021771 T   | C       | 0.2087  | 2.0e-06 | 0.792713 | rs5985551                   |              | Intergenic        | INTERGENIC | intergenic | RP11-436021.734 | Transcript | INTRONIC | intronic | 0 |  |  |    | 1 | 5.100      | 7           | 5        |            |             |          |  |
| 5 | rs2009282         | 2 | 56012214 C   | T       | 0.2107  | 5.2e-07 | 0.821888 | rs5985551                   |              | Intergenic        | INTERGENIC | intergenic | RP11-436021.735 | Transcript | INTRONIC | intronic | 0 |  |  |    | 1 | 4.504      | 7           | 5        |            |             |          |  |
| 5 | rs3972118         | 2 | 56131202 G   | A       | 0.3499  | 3.6e-06 | 0.695824 | 2.56191019_TA_T             | AC011306.2   | Transcript        | INTRONIC   | intronic   | RP11-436021.736 | Transcript | INTRONIC | intronic | 0 |  |  |    | 5 | 4.465      | 6           | 5        |            |             |          |  |
| 5 | 2.56042850_TTGAAA | 2 | 56042850 T   | TTGAAA  | 0.2028  | 2.5e-07 | 0.812969 | rs5985551                   |              | Intergenic        | INTERGENIC | intergenic | RP11-436021.737 | Transcript | INTRONIC | intronic | 0 |  |  |    | 5 | 4.448      | 6           | 5        |            |             |          |  |
| 5 | rs1727865         | 2 | 56095994 G   | C       | 0.1759  | 1.4e-15 | 0.843053 | rs1802575                   | EFEMP1       | Transcript        | INTRONIC   | intron     | RP11-436021.738 | Transcript | INTRONIC | intronic | 0 |  |  |    | 5 | 4.422      | 6           | 4        |            |             |          |  |
| 5 | rs1734934         | 2 | 56044936 G   | A       | 0.07256 | 8.4e-11 | 1        | rs1739379                   |              | Intergenic        | INTERGENIC | intergenic | RP11-436021.739 | Transcript | INTRONIC | intronic | 0 |  |  |    | 5 | 4.382      | 5           | 5        |            |             |          |  |
| 5 | rs70321374        | 2 | 56003816 G   | C       | 0.1243  | 1.7e-17 | 0.835609 | rs1802575                   |              | Intergenic        | INTERGENIC | intergenic | RP11-436021.740 | Transcript | INTRONIC | intronic | 0 |  |  |    | 5 | 4.136      | 7           | 5        |            |             |          |  |
| 5 | rs732132          | 2 | 56011881 T   | C       | 0.2773  | 5.2e-08 | 0.801224 | rs5985551                   |              | Intergenic        | INTERGENIC | intergenic | RP11-436021.741 | Transcript | INTRONIC | intronic | 0 |  |  |    | 5 | 4.271      | 6           | 5        |            |             |          |  |
| 5 | rs6745113         | 2 | 56034076 C   | T       | 0.3817  | 5.6e-06 | 0.905287 | rs1125608                   |              | Intergenic        | INTERGENIC | intergenic | RP11-436021.742 | Transcript | INTRONIC | intronic | 0 |  |  |    | 5 | 4.264      | 7           | 5        |            |             |          |  |
| 5 | rs14472359        | 2 | 56051245 T   | C       | 0.1292  | 6.2e-10 | 1        | rs7079392                   |              | Intergenic        | INTERGENIC | intergenic | RP11-436021.743 | Transcript | INTRONIC | intronic | 0 |  |  |    | 5 | 4.221      | 7           | 5        |            |             |          |  |
| 5 | rs4671260         | 2 | 56026374 C   | T       | 0.3579  | 2.8e-06 | 0.766554 | rs1125608                   |              | Intergenic        | INTERGENIC | intergenic | RP11-436021.744 | Transcript | INTRONIC | intronic | 0 |  |  |    | 5 | 4.168      | 6           | 14       |            |             |          |  |
| 5 | rs12472832        | 2 | 56200573 G   | C       | 0.3956  | 1.7e-06 | 0.839388 | 2.56191019_TA_T             | AC011306.2   | Transcript        | INTRONIC   | intronic   | RP11-436021.745 | Transcript | INTRONIC | intronic | 0 |  |  |    | 5 | 4.124      | 7           | 5        |            |             |          |  |
| 5 | rs1432561         | 2 | 56138045 T   | G       | 0.3499  | 2.5e-06 | 0.79072  | 2.56191019_TA_T             | RP11-48113.1 | Transcript        | INTRONIC   | intronic   | RP11-436021.746 | Transcript | INTRONIC | intronic | 0 |  |  |    | 5 | 4.064      | NA          | 5        |            |             |          |  |
| 5 | rs113192127       | 2 | 55998449_CCA | C       | 0.2296  | 5.5e-09 | 1        | rs113192127                 |              | Intergenic        | INTERGENIC | intergenic | RP11-436021.747 | Transcript | INTRONIC | intronic | 0 |  |  |    | 5 | 4.031      | NA          | 5        |            |             |          |  |
| 5 | rs4347871         | 2 | 56055825 G   | C       | 0.2038  | 8.6e-07 | 0.839882 | rs5985551                   |              | Intergenic        | INTERGENIC | intergenic | RP11-436021.748 | Transcript | INTRONIC | intronic | 0 |  |  |    | 1 | 4.018      | 7           | 5        |            |             |          |  |
| 5 | rs6125349         | 2 | 56009405 T   | A       | 0.2127  | 1.6e-06 | 0.799291 | rs5985551                   |              | Intergenic        | INTERGENIC | intergenic | RP11-436021.749 | Transcript | INTRONIC | intronic | 0 |  |  |    | 5 | 3.942      | NA          | 5        |            |             |          |  |
| 5 | rs734540          | 2 | 56191794 G   | A       | 0.3936  | 9.5e-07 | 0.854927 | 2.56191019_TA_T             | AC011306.2   | Transcript        | INTRONIC   | intronic   | RP11-436021.750 | Transcript | INTRONIC | intronic | 0 |  |  |    | 5 | 3.695      | 5           | 5        |            |             |          |  |
| 5 | rs6712017         | 2 | 56028444 C   | T       | 0.3539  | 2.9e-06 | 0.79088  | rs1125608                   |              | Intergenic        | INTERGENIC | intergenic | RP11-436021.751 | Transcript | INTRONIC | intronic | 0 |  |  |    | 5 | 3.650      | 5           | 7        |            |             |          |  |
| 5 | rs1432560         | 2 | 56195816 T   | G       | 0.3489  | 2.6e-06 | 0.837082 | 2.56191019_TA_T             | RP11-48113.1 | Transcript        | INTRONIC   | intronic   | RP11-436021.752 | Transcript | INTRONIC | intronic | 0 |  |  |    | 5 | 3.642      | NA          | 5        |            |             |          |  |
| 5 | rs2052033         | 2 | 56028107 G   | C       | 0.3588  | 2.7e-06 | 0.770217 | rs1125608                   |              | Intergenic        | INTERGENIC | intergenic | RP11-436021.753 | Transcript | INTRONIC | intronic | 0 |  |  |    | 5 | 3.527      | 3a          | 2        |            |             |          |  |
| 5 | rs3452760         | 2 | 56189053 G   | A       | 0.1708  | 1.2e-06 | 0.758918 | 2.56191019_TA_T             | RP11-48113.1 | Transcript        | INTRONIC   | intronic   | RP11-436021.754 | Transcript | INTRONIC | intronic | 0 |  |  |    | 5 | 3.525      | 6           | 5        |            |             |          |  |
| 5 | rs6733889         | 2 | 56189052 G   | A       | 0.1767  | 1.2e-06 | 0.758918 | 2.56191019_TA_T             | AC011306.2   | Transcript        | INTRONIC   | intronic   | RP11-436021.755 | Transcript | INTRONIC | intronic | 0 |  |  |    | 5 | 3.491      | 5           | 5        |            |             |          |  |
| 5 | rs6757057         | 2 | 56185138 A   | G       | 0.1560  | 4.0e-06 | 0.793695 | rs1125608                   |              | Intergenic        | INTERGENIC | intergenic | RP11-436021.756 | Transcript | INTRONIC | intronic | 0 |  |  |    | 5 | 3.363      | 5           | 5        |            |             |          |  |
| 5 | rs7573721         | 2 | 56130598 C   | T       | 0.1598  | 4.3e-06 | 0.773895 | rs1125608                   |              | Intergenic        | INTERGENIC | intergenic | RP11-436021.757 | Transcript | INTRONIC | intronic | 0 |  |  |    | 5 | 2.929      | 6           | 14       |            |             |          |  |
| 5 | rs1620305         | 2 | 56203065 A   | G       | 0.1946  | 1.6e-06 | 0.818462 | 2.56191019_TA_T             | AC011306.2   | Transcript        | INTRONIC   | intronic   | RP11-436021.758 | Transcript | INTRONIC | intronic | 0 |  |  |    | 5 | 2.833      | 6           | 5        |            |             |          |  |
| 5 | rs1466485         | 2 | 56184741 A   | G       | 0.1608  | 2.5e-06 | 0.793635 | 2.56191019_TA_T             | RP11-48113.1 | Transcript        | INTRONIC   | intronic   | RP11-436021.759 | Transcript | INTRONIC | intronic | 0 |  |  |    | 5 | 2.825      | NA          | 5        |            |             |          |  |
| 5 | rs112481479       | 2 | 56010910 T   | C       | 0.2038  | 6.7e-07 | 0.839882 | rs5985551                   |              | RegulatoryFeature | REGULATORY | regulatory | RP11-436021.760 | Transcript | INTRONIC | intronic | 0 |  |  |    | 1 | 2.4491e-05 | 0.001485    | RP527A   | 2.4491e-05 | 0.001485    |          |  |
| 5 | rs5802712         | 2 | 56021127 T   | C       | 0.2107  | 2.2e-06 | 0.792103 | rs5985551                   |              | Intergenic        | INTERGENIC | intergenic | RP11-436021.761 | Transcript | INTRONIC | intronic | 1 |  |  |    | 1 | RP527A     | 1.7356e-05  | 0.001485 | RP527A     | 1.7356e-05  | 0.001485 |  |
| 5 | rs4991004         | 2 | 55994482 G   | C       | 0.1091  | 2.0e-13 | 0.910513 | rs1339578                   |              | Intergenic        | INTERGENIC | intergenic | RP11-436021.762 | Transcript | INTRONIC | intronic | 0 |  |  |    | 5 | 2.785      | 4           | 2        |            |             |          |  |
| 5 | rs7885789         | 2 | 56135099 A   | G       | 0.08151 | 2.5e-10 | 0.916129 | 2.56116193_TTGATCTCTGEEFMP1 |              | Transcript        | INTRONIC   | intron     | RP11-436021.763 | Transcript | INTRONIC | intronic | 0 |  |  |    | 5 | 2.749      | 7           | 5        |            |             |          |  |
| 5 | rs17047234        | 2 | 56015083 A   | C       | 0.2286  | 2.1e-08 | 0.752588 | rs5985551                   |              | Intergenic        | INTERGENIC | intergenic | RP11-436021.764 | Transcript | INTRONIC | intronic | 1 |  |  |    | 1 | RP527A     | 3.6799e-05  | 0.001485 | RP527A     | 3.6799e-05  | 0.001485 |  |
| 5 | rs1318992         | 2 | 56021390 G   | C       | 0.2426  | 2.6e-06 | 0.778181 | rs1125608                   |              | Intergenic        | INTERGENIC | intergenic | RP11-436021.765 | Transcript | INTRONIC | intronic | 0 |  |  |    | 5 | 2.437      | 6           | 5        |            |             |          |  |
| 5 | rs17360379        | 2 | 5592212 T    | C       | 0.07256 | 8.2e-11 | 1        | rs17360379                  |              | Intergenic        | INTERGENIC | intergenic | RP11-436021.766 | Transcript | INTRONIC | intronic | 0 |  |  |    | 5 | 2.396      | 7           | 5        |            |             |          |  |
| 5 | rs1027129         | 2 | 56081813 C   | T       | 0.0564  | 1.1e-10 | 1        | rs10187129                  |              | Intergenic        | INTERGENIC | intergenic | RP11-436021.767 | Transcript | INTRONIC | intronic | 0 |  |  |    | 5 | 2.391      | 7           | 5        |            |             |          |  |
| 5 | rs18164155        | 2 | 5608108 T    | C       | 0.1274  | 6.2e-10 | 1        | rs1802575                   |              | RegulatoryFeature | REGULATORY | regulatory | RP11-436021.768 | Transcript | INTRONIC | intronic | 0 |  |  |    | 5 | 2.365      | 3a          | 2        |            |             |          |  |
| 5 | rs20407878        | 2 | 56071109 T   | C       | 0.1233  | 1.3e-17 | 0.943901 | rs1802575                   |              | Intergenic        | INTERGENIC | intergenic | RP11-436021.769 | Transcript | INTRONIC | intronic | 0 |  |  |    | 5 | 2.335      | 6           | 2        |            |             |          |  |
| 5 | rs1346790         | 2 | 56091871 T   | C       | 0.1787  | 1.6e-06 | 0.841331 | rs1125608                   | EFEMP1       | Intergenic        | DOWNSTREAM | downstream | RP11-436021.770 | Transcript | INTRONIC | intronic | 0 |  |  |    | 5 | 2.315      | NA          | 4        |            |             |          |  |
| 5 | rs2868894         | 2 | 56151369 A   | C       | 0.1916  | 3.2e-06 | 0.854927 | 2.56191019_TA_T             | AC011306.2   | Transcript        | INTRONIC   | intronic   | RP11-436021.771 | Transcript | INTRONIC | intronic | 0 |  |  |    | 5 | 2.191      | 5           | 5        |            |             |          |  |
| 5 | rs1682853         | 2 | 5618553 G    | T       | 0.3489  | 3.3e-06 | 0.87082  | 2.56191019_TA_T             | RP11-48113.1 | Transcript        | INTRONIC   | intronic   | RP11-436021.772 | Transcript | INTRONIC | intronic | 0 |  |  |    | 5 | 2.188      | 4           | 5        |            |             |          |  |
| 5 | rs7074932         | 2 | 56081728 A   | G       | 0.1292  | 6.2e-09 | 1        | rs7074932                   |              | Intergenic        | INTERGENIC | intergenic | RP11-436021.773 | Transcript | INTRONIC | intronic | 0 |  |  |    | 5 | 2.113      | 5           | 2        |            |             |          |  |
| 5 | rs6172916         | 2 | 56189501 G   | A       | 0.1708  | 1.2e-06 | 0.758918 | 2.56191019_TA_T             | RP11-48113.1 | Transcript        | INTRONIC   | intronic   | RP11-436021.774 | Transcript | INTRONIC | intronic | 0 |  |  |    | 5 | 2.110      | 5           | 5        |            |             |          |  |
| 5 | rs11891573        | 2 | 56007034 C   | T       | 0.2058  | 3.6e-06 | 0.728776 | rs5985551                   |              | RegulatoryFeature | REGULATORY | regulatory | RP11-436021.775 | Transcript | INTRONIC | intronic | 0 |  |  |    | 5 | 2.101      | 4           | 1        |            |             |          |  |
| 5 | rs7506567         | 2 | 56012652 T   | C       | 0.2078  | 2.7e-06 | 0.818389 | rs5985551                   |              | Intergenic        | INTERGENIC | intergenic | RP11-436021.776 | Transcript | INTRONIC | intronic | 1 |  |  |    | 1 | RP527A     | 1.06267e-05 | 0.001485 | RP527A     | 1.06267e-05 | 0.001485 |  |
| 5 | rs1750458         | 2 | 56021098 T   | C       | 0.3579  | 1.0e-06 | 0.774521 | rs1125608                   |              | Intergenic        | INTERGENIC | intergenic | RP11-436021.777 | Transcript | INTRONIC | intronic | 0 |  |  |    | 5 | 2.086      | 7           | 2        |            |             |          |  |
| 5 | rs1339578         | 2 | 56007636 T   | C       | 0.1193  | 7.0e-10 | 1        | rs1339578                   |              | Intergenic        | INTERGENIC | intergenic | RP11-436021.778 | Transcript | INTRONIC | intronic | 0 |  |  |    | 5 | 1.980      | 7           | 2        |            |             |          |  |
| 5 | rs6724869         | 2 | 56034573 T   | A       | 0.2078  | 2.6e-06 | 0.818389 | rs5985551                   |              | Intergenic        | INTERGENIC | intergenic | RP11-436021.779 | Transcript | INTRONIC | intronic | 1 |  |  |    | 1 | RP527A     | 1.06267e-05 | 0.001485 | RP527A     | 1.06267e-05 | 0.001485 |  |
| 5 | rs12490652        | 2 | 56010473 C   | T       | 0.2127  | 3.4e-07 | 0.811617 | rs5985551                   |              | Intergenic        | INTERGENIC | intergenic | RP11-436021.780 | Transcript | INTRONIC | intronic | 0 |  |  |    | 5 | 1.954      | 7           | 5        |            |             |          |  |
| 5 | rs10180277        | 2 | 56181112 T   | G       | 0.3808  | 1.0e-06 | 0.847432 | 2.56191019_TA_T             | AC011306.2   | Transcript        | INTRONIC   | intronic   | RP11-436021.781 | Transcript | INTRONIC | intronic | 0 |  |  | </ |   |            |             |          |            |             |          |  |

|   |               |                    |    |                 |      |        |         |            |                  |               |            |          |          |                |            |          |          |   |   |       |    |    |     |
|---|---------------|--------------------|----|-----------------|------|--------|---------|------------|------------------|---------------|------------|----------|----------|----------------|------------|----------|----------|---|---|-------|----|----|-----|
| 6 | 11-2774893A.C | rs12288512         | 11 | 27747671 A      | G    | 0.1799 | 1.1e-16 | 1          | rs1730930        | RP11-587021.4 | Transcript | INTRONIC | intronic | RP11-43623.847 | Transcript | INTRONIC | intronic | 0 | 6 | 19.83 | 5  | 13 | top |
| 6 |               | rs1730930          | 11 | 27748493 A      | C    | 0.1799 | 6.8e-17 | 1          | rs1730930        | RP11-587021.4 | Transcript | INTRONIC | intronic | RP11-43623.848 | Transcript | INTRONIC | intronic | 0 | 6 | 18.82 | 5  | 13 |     |
| 6 |               | rs1277363          | 11 | 27748503 C      | T    | 0.1799 | 1.2e-16 | 1          | rs1730930        | RP11-587021.4 | Transcript | INTRONIC | intronic | RP11-43623.849 | Transcript | INTRONIC | intronic | 0 | 6 | 17.94 | 4  | 5  | top |
| 6 |               | rs1031019          | 11 | 2772810 A       | G    | 0.2823 | 1.1e-16 | 0.999895   | rnc62369         | BNF           | Transcript | INTRONIC | intron   | RP11-43623.850 | Transcript | INTRONIC | intronic | 0 | 6 | 16.17 | 4  | 5  |     |
| 6 |               | rs1269837          | 11 | 27593570 G      | A    | 0.2058 | 6.1e-08 | 0.913788   | r35288664        | BNF-AS        | Transcript | INTRONIC | intronic | RP11-43623.851 | Transcript | INTRONIC | intronic | 0 | 6 | 15.87 | 6  | 5  |     |
| 6 |               | rs16513711         | 11 | 2762334 A       | G    | 0.2298 | 8.7e-15 | 0.75402352 | r35288664        | BNF-AS        | Transcript | INTRONIC | intron   | RP11-587021.4  | Transcript | INTRONIC | intronic | 0 | 6 | 15.30 | 6  | 5  |     |
| 6 |               | rs1515480          | 11 | 2767912 T       | C    | 0.2952 | 1.3e-12 | 0.8602183  | rnc62369         | BNF-AS        | Transcript | INTRONIC | intronic | RP11-43623.853 | Transcript | INTRONIC | intronic | 0 | 6 | 14.71 | 4  | 4  |     |
| 6 |               | rs1013402          | 11 | 27712381 G      | A    | 0.2903 | 9.3e-15 | 0.954515   | rnc62369         | BNF-AS        | Transcript | INTRONIC | intron   | RP11-43623.854 | Transcript | INTRONIC | intronic | 0 | 6 | 14.17 | NA | 5  |     |
| 6 |               | rs1571704A         | 11 | 2767780A A/C    | C    | 0.2336 | 4.4e-07 | 0.8388     | r35288664        | BNF-AS        | Transcript | INTRONIC | intronic | RP11-43623.855 | Transcript | INTRONIC | intronic | 0 | 6 | 13.88 | 7  | 5  |     |
| 6 |               | rs1727239          | 11 | 27547379 C      | A    | 0.2038 | 2.7e-07 | 0.904044   | r35288664        | BNF-AS        | Transcript | INTRONIC | intronic | RP11-43623.856 | Transcript | INTRONIC | intronic | 0 | 6 | 11.63 | 5  | 5  |     |
| 6 |               | rs1100102          | 11 | 27681596 G      | C    | 0.2336 | 2.4e-14 | 0.738887   | r1730930         | BNF           | Transcript | INTRONIC | intron   | RP11-43623.857 | Transcript | INTRONIC | intronic | 0 | 6 | 11.41 | 7  | 4  |     |
| 6 |               | rs1688800          | 11 | 2772227 T       | G    | 0.2286 | 7.6e-15 | 0.748074   | r1730930         | BNF           | Transcript | INTRONIC | intronic | RP11-43623.858 | Transcript | INTRONIC | intronic | 0 | 6 | 10.73 | 20 | 1  |     |
| 6 |               | rs15288664         | 11 | 27595442 TA     | A    | 0.2207 | 1.1e-03 | 0.73       | r35288664        | BNF-AS        | Transcript | INTRONIC | intronic | RP11-43623.859 | Transcript | INTRONIC | intronic | 0 | 6 | 10.31 | NA | 5  |     |
| 6 |               | rs944119           | 11 | 2772228 T       | G    | 0.2873 | 5.2e-15 | 0.95139    | rnc62369         | BNF-AS        | Transcript | INTRONIC | intron   | RP11-43623.860 | Transcript | INTRONIC | intronic | 0 | 6 | 9.509 | 4  | 1  |     |
| 6 |               | rs29619            | 11 | 2766702 G       | T    | 0.2853 | 4.0e-14 | 0.906267   | rnc62369         | BNF-AS        | Transcript | INTRONIC | intronic | RP11-43623.861 | Transcript | INTRONIC | intronic | 0 | 6 | 8.645 | NA | 5  |     |
| 6 |               | rs11503157         | 11 | 27704201 A      | G    | 0.2298 | 9.5e-15 | 0.73812367 | r1730930         | BNF           | Transcript | INTRONIC | intron   | RP11-43623.862 | Transcript | INTRONIC | intronic | 0 | 6 | 8.032 | 7  | 5  |     |
| 6 |               | 11-27579379 TA_T   | 11 | 27579379 TA     | TA   | 0.2058 | 7.1e-08 | 0.913788   | r35288664        | BNF-AS        | Transcript | INTRONIC | intronic | RP11-43623.863 | Transcript | INTRONIC | intronic | 0 | 6 | 7.745 | NA | 5  |     |
| 6 |               | rs1517468          | 11 | 2768286 T       | A    | 0.3032 | 1.7e-13 | 0.90496    | rnc62369         | BNF-AS        | Transcript | INTRONIC | intronic | RP11-43623.864 | Transcript | INTRONIC | intronic | 0 | 6 | 7.089 | 7  | 5  |     |
| 6 |               | rs10707647         | 11 | 2764782 A       | G    | 0.2038 | 1.5e-07 | 0.90208    | r35288664        | BNF-AS        | Transcript | INTRONIC | intronic | RP11-43623.865 | Transcript | INTRONIC | intronic | 0 | 6 | 6.479 | 5  | 5  |     |
| 6 |               | rs2353487          | 11 | 27603970 T      | C    | 0.3072 | 1.2e-13 | 0.90496    | rnc62369         | BNF           | Transcript | INTRONIC | intron   | RP11-43623.866 | Transcript | INTRONIC | intronic | 0 | 6 | 6.355 | 7  | 5  |     |
| 6 |               | rs10835211         | 11 | 27701365 A      | G    | 0.2276 | 9.1e-15 | 0.742163   | r1730930         | BNF           | Transcript | INTRONIC | intron   | RP11-43623.867 | Transcript | INTRONIC | intronic | 0 | 6 | 6.312 | 4  | 5  |     |
| 6 |               | rs11000057         | 11 | 27620932 T      | C    | 0.2058 | 7.7e-08 | 0.912798   | r35288664        | BNF-AS        | Transcript | INTRONIC | intronic | RP11-43623.868 | Transcript | INTRONIC | intronic | 0 | 6 | 6.206 | 4  | 5  |     |
| 6 |               | rs12419402         | 11 | 27623309 A      | G    | 0.2058 | 5.2e-08 | 0.903422   | r35288664        | BNF-AS        | Transcript | INTRONIC | intronic | RP11-43623.869 | Transcript | INTRONIC | intronic | 0 | 6 | 6.248 | 6  | 5  |     |
| 6 |               | rs11000088         | 11 | 27646247 A      | G    | 0.2286 | 3.5e-13 | 0.729018   | 11-27670231_CT_C | BNF-AS        | Transcript | INTRONIC | intronic | RP11-43623.870 | Transcript | INTRONIC | intronic | 0 | 6 | 5.972 | 5  | 4  |     |
| 6 |               | rs922454           | 11 | 2764219 G       | A    | 0.2058 | 6.0e-08 | 0.913788   | r35288664        | BNF-AS        | Transcript | INTRONIC | intronic | RP11-43623.871 | Transcript | INTRONIC | intronic | 0 | 6 | 5.688 | 7  | 5  |     |
| 6 |               | 11-27670231_CT_C   | 11 | 27670231 CT_C   | CT   | 0.2813 | 4.2e-13 | 1          | 11-27670231_CT_C | BNF-AS        | Transcript | INTRONIC | intronic | RP11-43623.872 | Transcript | INTRONIC | intronic | 0 | 6 | 4.974 | NA | 5  |     |
| 6 |               | 11-27670234_CT_C   | 11 | 27670234 CT_C   | CT   | 0.2734 | 1.8e-07 | 0.935699   | r35288664        | BNF-AS        | Transcript | INTRONIC | intronic | RP11-43623.873 | Transcript | INTRONIC | intronic | 0 | 6 | 4.791 | NA | 5  |     |
| 6 |               | 11-27716133_CT_C   | 11 | 27716133 CT_C   | CT   | 0.2614 | 8.2e-10 | 1          | 11-27716133_CT_C | BNF-AS        | Transcript | INTRONIC | intronic | RP11-43623.874 | Transcript | INTRONIC | intronic | 0 | 6 | 4.544 | NA | 5  |     |
| 6 |               | rs6484386          | 11 | 27516703 C      | T    | 0.2397 | 4.0e-06 | 0.873044   | r35288664        | BNF-AS        | Transcript | INTRONIC | intronic | RP11-43623.875 | Transcript | INTRONIC | intronic | 0 | 6 | 4.057 | 6  | 2  |     |
| 6 |               | rs1038959          | 11 | 27549310 G      | T    | 0.2286 | 9.4e-07 | 0.929209   | r35288664        | BNF-AS        | Transcript | INTRONIC | intron   | RP11-43623.876 | Transcript | INTRONIC | intronic | 0 | 6 | 3.972 | 7  | 5  |     |
| 6 |               | rs1131924          | 11 | 27516709 T      | C    | 0.2157 | 1.7e-07 | 0.830863   | r35288664        | BNF-AS        | Transcript | INTRONIC | intronic | RP11-43623.877 | Transcript | INTRONIC | intronic | 0 | 6 | 3.699 | NA | 5  |     |
| 6 |               | rs10707646         | 11 | 27507944 C      | G    | 0.2387 | 2.7e-08 | 0.898613   | r35288664        | BNF-AS        | Transcript | INTRONIC | intronic | RP11-43623.878 | Transcript | INTRONIC | intronic | 0 | 6 | 3.484 | 5  | 5  |     |
| 6 |               | rs1100079          | 11 | 2762728 G       | C    | 0.2197 | 1.2e-08 | 0.984392   | r35288664        | BNF-AS        | Transcript | INTRONIC | intron   | RP11-43623.879 | Transcript | INTRONIC | intronic | 0 | 6 | 3.359 | 7  | 5  |     |
| 6 |               | rs448408           | 11 | 27521802 G      | T    | 0.2038 | 2.9e-07 | 0.904044   | r35288664        | BNF-AS        | Transcript | INTRONIC | intronic | RP11-43623.880 | Transcript | INTRONIC | intronic | 0 | 6 | 3.356 | 6  | 4  |     |
| 6 |               | 11-27681544_CTGT_T | 11 | 27681544 CTGT_T | CTGT | 0.3042 | 4.6e-13 | 0.901133   | rnc62369         | BNF           | Transcript | INTRONIC | intronic | RP11-43623.881 | Transcript | INTRONIC | intronic | 0 | 6 | 3.289 | 4  | 5  |     |
| 6 |               | rs10707658         | 11 | 2767252 G       | C    | 0.2853 | 4.5e-14 | 0.906267   | rnc62369         | BNF-AS        | Transcript | INTRONIC | intronic | RP11-43623.882 | Transcript | INTRONIC | intronic | 0 | 6 | 3.172 | 5  | 5  |     |
| 6 |               | rs17989874         | 11 | 27667236 A      | G    | 0.2346 | 2.9e-13 | 0.712727   | 11-27670231_CT_C | BNF-AS        | Transcript | INTRONIC | intronic | RP11-43623.883 | Transcript | INTRONIC | intronic | 0 | 6 | 3.127 | 5  | 1  |     |
| 6 |               | rs12571588         | 11 | 27604518 C      | T    | 0.2157 | 2.4e-08 | 0.929423   | r35288664        | BNF-AS        | Transcript | INTRONIC | intronic | RP11-43623.884 | Transcript | INTRONIC | intronic | 0 | 6 | 2.981 | 7  | 5  |     |
| 6 |               | rs11003121         | 11 | 27716207 T      | C    | 0.2942 | 4.4e-15 | 0.948391   | rnc62369         | BNF           | Transcript | INTRONIC | intron   | RP11-43623.885 | Transcript | INTRONIC | intronic | 0 | 6 | 2.698 | 6  | 5  |     |
| 6 |               | rs4684311          | 11 | 2751374 A       | G    | 0.2038 | 3.5e-07 | 0.904044   | r35288664        | BNF-AS        | Transcript | INTRONIC | intronic | RP11-43623.886 | Transcript | INTRONIC | intronic | 0 | 6 | 2.679 | 4  | 5  |     |
| 6 |               | rs10714393         | 11 | 27570090 G      | C    | 0.2276 | 4.5e-07 | 0.904239   | r35288664        | BNF-AS        | Transcript | INTRONIC | intronic | RP11-43623.887 | Transcript | INTRONIC | intronic | 0 | 6 | 2.654 | 8  | 5  |     |
| 6 |               | rs7125904          | 11 | 27543003 G      | T    | 0.2038 | 2.7e-07 | 0.904044   | r35288664        | BNF-AS        | Transcript | INTRONIC | intron   | RP11-43623.888 | Transcript | INTRONIC | intronic | 0 | 6 | 2.383 | 6  | 5  |     |
| 6 |               | rs10815201         | 11 | 27618265 G      | A    | 0.2197 | 1.5e-08 | 0.994811   | r35288664        | BNF-AS        | Transcript | INTRONIC | intronic | RP11-43623.889 | Transcript | INTRONIC | intronic | 0 | 6 | 2.329 | 5  | 4  |     |
| 6 |               | rs1717507          | 11 | 27714884 C      | T    | 0.3002 | 2.5e-13 | 0.916006   | rnc62369         | BNF-AS        | Transcript | INTRONIC | intron   | RP11-43623.890 | Transcript | INTRONIC | intronic | 0 | 6 | 2.246 | 6  | 3  |     |
| 6 |               | rs4681311          | 11 | 27583193 A      | G    | 0.2058 | 4.6e-08 | 0.913788   | r35288664        | BNF-AS        | Transcript | INTRONIC | intronic | RP11-43623.891 | Transcript | INTRONIC | intronic | 0 | 6 | 2.182 | 7  | 5  |     |
| 6 |               | rs12786130         | 11 | 27505954 T      | C    | 0.2167 | 5.4e-07 | 0.780802   | r35288664        | BNF-AS        | Transcript | INTRONIC | intronic | RP11-43623.892 | Transcript | INTRONIC | intronic | 0 | 6 | 2.173 | 7  | 5  |     |
| 6 |               | rs11001010         | 11 | 27606506 C      | T    | 0.2486 | 1.7e-14 | 0.737467   | r1730930         | BNF           | Transcript | INTRONIC | intronic | RP11-43623.893 | Transcript | INTRONIC | intronic | 0 | 6 | 2.172 | 5  | 5  |     |
| 6 |               | rs12361380         | 11 | 27615609 A      | G    | 0.2058 | 7.8e-08 | 0.913788   | r35288664        | BNF-AS        | Transcript | INTRONIC | intronic | RP11-43623.894 | Transcript | INTRONIC | intronic | 0 | 6 | 2.095 | 6  | 5  |     |
| 6 |               | rs73430670         | 11 | 27615630 G      | A    | 0.2296 | 2.0e-07 | 0.944813   | r35288664        | BNF-AS        | Transcript | INTRONIC | intronic | RP11-43623.895 | Transcript | INTRONIC | intronic | 0 | 6 | 1.998 | 5  | 5  |     |
| 6 |               | rs10875197         | 11 | 27607541 T      | C    | 0.2058 | 9.0e-08 | 0.913788   | r35288664        | BNF-AS        | Transcript | INTRONIC | intronic | RP11-43623.896 | Transcript | INTRONIC | intronic | 0 | 6 | 1.970 | 6  | 5  |     |
| 6 |               | rs1071410          | 11 | 2751188 C       | T    | 0.2028 | 2.3e-07 | 0.899123   | r35288664        | BNF-AS        | Transcript | INTRONIC | intronic | RP11-43623.897 | Transcript | INTRONIC | intronic | 0 | 6 | 1.925 | 6  | 5  |     |
| 6 |               | rs12842656         | 11 | 27601805 C      | T    | 0.3091 | 3.9e-14 | 0.881357   | rnc62369         | BNF           | Transcript | INTRONIC | intron   | RP11-43623.898 | Transcript | INTRONIC | intronic | 0 | 6 | 1.873 | 6  | 5  |     |
| 6 |               | rs11001017         | 11 | 27604835 G      | A    | 0.2346 | 2.4e-14 | 0.737467   | r1730930         | BNF           | Transcript | INTRONIC | intronic | RP11-43623.899 | Transcript | INTRONIC | intronic | 0 | 6 | 1.828 | 20 | 2  |     |
| 6 |               | rs4922187          | 11 | 27607902 T      | C    | 0.2177 | 6.7e-07 | 0.802017   | r35288664        | BNF-AS        | Transcript | INTRONIC | intronic | RP11-43623.900 | Transcript | INTRONIC | intronic | 0 | 6 | 1.802 | 6  | 5  |     |
| 6 |               | rs73430668         | 11 | 27613419 T      | C    | 0.2058 | 8.7e-08 | 0.913788   | r35288664        | BNF-AS        | Transcript | INTRONIC | intronic | RP11-43623.901 | Transcript | INTRONIC | intronic | 0 | 6 | 1.650 | 7  | 5  |     |
| 6 |               | rs4684314          | 11 | 27505109 A      | A    | 0.2038 | 2.6e-07 | 0.904044   | r35288664        | BNF-AS        | Transcript | INTRONIC | intronic | RP11-43623.902 | Transcript | INTRONIC | intronic | 0 | 6 | 1.586 | 6  | 5  |     |
| 6 |               | rs1038600          | 11 | 27549310 G      | T    | 0.2038 | 2.6e-07 | 0.904044   | r35288664        | BNF-AS        | Transcript | INTRONIC | intronic | RP11-43623.903 | Transcript | INTRONIC | intronic | 0 | 6 | 1.585 | 6  | 5  |     |
| 6 |               | rs10851190         | 11 | 27546447 T      | C    | 0.2286 | 9.5e-07 | 0.929209   | r35288664        | BNF-AS        | Transcript | INTRONIC | intronic | RP11-43623.904 | Transcript | INTRONIC | intronic | 0 | 6 | 1.562 | 6  | 5  |     |
| 6 |               | rs1352479          | 11 | 27593899 T      | A    | 0.2346 | 2.2e-07 | 0.912377   | r35288664        | BNF-AS        | Transcript | INTRONIC |          |                |            |          |          |   |   |       |    |    |     |

|   |                  |    |          |     |             |        |         |          |           |                   |            |            |                 |                  |            |          |          |   |          |             |             |          |             |             |   |       |    |    |  |
|---|------------------|----|----------|-----|-------------|--------|---------|----------|-----------|-------------------|------------|------------|-----------------|------------------|------------|----------|----------|---|----------|-------------|-------------|----------|-------------|-------------|---|-------|----|----|--|
| 7 | rsl00026         | 19 | 7877437  | A   | G           | 0.4195 | 9.6e-08 | r033829  | r36035956 | SPINT2            | Transcript | INTRONIC   | intron          | RP11-436202.968  | Transcript | INTRONIC | intronic | 1 | PPP1814A | 7.08536e-13 | 4.70966e-32 | PPP1814A | 7.08536e-13 | 4.70966e-32 | 7 | 1.471 | 6  | 4  |  |
| 7 | r7938509         | 19 | 7875586  | A   | G           | 0.159  | 1.9e-06 | r074827  | r2752345  | SPINT2            | Transcript | INTRONIC   | intron          | RP11-436202.968  | Transcript | INTRONIC | intronic | 1 | PPP1814A | 6.71177e-07 | 4.70966e-32 | PPP1814A | 6.71177e-07 | 4.70966e-32 | 7 | 1.423 | 5  | 5  |  |
| 7 | r7231445         | 19 | 7875144  | T   | G           | 0.205  | 3.4e-08 | r074827  | r2752345  | SPINT2            | Transcript | INTRONIC   | intron          | RP11-436202.970  | Transcript | INTRONIC | intronic | 1 | PPP1814A | 1.68318e-07 | 4.70966e-32 | PPP1814A | 1.68318e-07 | 4.70966e-32 | 7 | 1.146 | 11 | 10 |  |
| 7 | r5978203         | 19 | 7875120  | A   | C           | 0.2097 | 7.1e-08 | r039463  | r2752345  | SPINT2            | Transcript | INTRONIC   | intron          | RP11-436202.971  | Transcript | INTRONIC | intronic | 1 | PPP1814A | 1.68191e-07 | 4.70966e-32 | PPP1814A | 1.68191e-07 | 4.70966e-32 | 7 | 1.119 | 5  | 1  |  |
| 7 | r5999125         | 19 | 7875143  | A   | G           | 0.4871 | 1.4e-06 | r040029  | r2752820  | SPINT2            | Intergenic | UPSTREAM   | upstream        | RP11-436202.972  | Transcript | INTRONIC | intronic | 1 | PPP1814A | 7.45001e-13 | 4.70966e-32 | PPP1814A | 7.45001e-13 | 4.70966e-32 | 7 | 1.049 | 6  | 5  |  |
| 7 | r5781820         | 19 | 7872676  | A   | A           | 0.4173 | 2.1e-08 | r074827  | r2752820  | SPINT2            | Intergenic | INTRONIC   | intron          | RP11-436202.973  | Transcript | INTRONIC | intronic | 1 | PPP1814A | 6.87226e-06 | 4.70966e-32 | PPP1814A | 6.87226e-06 | 4.70966e-32 | 7 | 0.475 | 4  | 2  |  |
| 7 | r11668070        | 19 | 7816993  | A   | G           | 0.4911 | 5.9e-16 | r070572  | r4802297  | SPINT2            | Transcript | INTRONIC   | intron          | RP11-436202.974  | Transcript | INTRONIC | intronic | 1 | PPP1814A | 2.08633e-36 | 4.70966e-32 | PPP1814A | 2.08633e-36 | 4.70966e-32 | 7 | 0.830 | 6  | 5  |  |
| 7 | r8102476         | 19 | 7875613  | T   | C           | 0.5553 | 1.5e-13 | r0804307 | r4802297  | SPINT2            | Transcript | INTRONIC   | intron          | RP11-436202.975  | Transcript | INTRONIC | intronic | 1 | PPP1814A | 6.71245e-27 | 4.70966e-32 | PPP1814A | 6.71245e-27 | 4.70966e-32 | 7 | 0.781 | 5  | 2  |  |
| 7 | r5099240         | 19 | 7874371  | T   | C           | 0.16   | 1.8e-06 | r047914  | r2752345  | SPINT2            | Transcript | INTRONIC   | intron          | RP11-436202.976  | Transcript | INTRONIC | intronic | 1 | PPP1814A | 6.71177e-07 | 4.70966e-32 | PPP1814A | 6.71177e-07 | 4.70966e-32 | 7 | 0.475 | 4  | 2  |  |
| 7 | r11088450        | 19 | 7874239  | C   | T           | 0.4871 | 9.2e-16 | r0562482 | r4802297  | SPINT2            | Intergenic | UPSTREAM   | upstream        | RP11-436202.977  | Transcript | INTRONIC | intronic | 1 | PPP1814A | 1.18848e-26 | 4.70966e-32 | PPP1814A | 1.18848e-26 | 4.70966e-32 | 7 | 0.706 | 5  | 1  |  |
| 7 | r289100          | 19 | 7876710  | C   | T           | 0.4175 | 1.1e-07 | r034295  | r36035956 | SPINT2            | Transcript | INTRONIC   | intron          | RP11-436202.978  | Transcript | INTRONIC | intronic | 1 | PPP1814A | 7.17338e-13 | 4.70966e-32 | PPP1814A | 7.17338e-13 | 4.70966e-32 | 7 | 0.674 | 7  | 4  |  |
| 7 | r11667258        | 19 | 7875104  | T   | A           | 0.185  | 3.9e-13 | r058174  | r4802297  | SPINT2            | Transcript | INTRONIC   | intron          | RP11-436202.979  | Transcript | INTRONIC | intronic | 1 | PPP1814A | 6.71177e-07 | 4.70966e-32 | PPP1814A | 6.71177e-07 | 4.70966e-32 | 7 | 0.475 | 4  | 2  |  |
| 7 | r10562797        | 19 | 7874749  | ATT | A           | 0.4722 | 1.7e-14 | r0182963 | r4802297  | SPINT2            | Transcript | INTRONIC   | intron          | RP11-436202.980  | Transcript | INTRONIC | intronic | 0 |          |             |             |          |             |             |   |       |    |    |  |
| 7 | r1261109         | 19 | 7877281  | C   | T           | 0.4175 | 1.9e-07 | r034295  | r36035956 | SPINT2            | Transcript | INTRONIC   | intron          | RP11-436202.981  | Transcript | INTRONIC | intronic | 1 | PPP1814A | 7.08536e-13 | 4.70966e-32 | PPP1814A | 7.08536e-13 | 4.70966e-32 | 7 | 0.537 | 4  | 4  |  |
| 7 | r1261109         | 19 | 7877281  | C   | T           | 0.4175 | 1.9e-07 | r034295  | r36035956 | SPINT2            | Transcript | INTRONIC   | intron          | RP11-436202.982  | Transcript | INTRONIC | intronic | 1 | PPP1814A | 7.08536e-13 | 4.70966e-32 | PPP1814A | 7.08536e-13 | 4.70966e-32 | 7 | 0.537 | 4  | 4  |  |
| 7 | r34565749        | 19 | 7877726  | T   | T           | 0.4195 | 1.4e-07 | r033829  | r36035956 | SPINT2            | Transcript | INTRONIC   | intron          | RP11-436202.983  | Transcript | INTRONIC | intronic | 1 | PPP1814A | 7.08536e-13 | 4.70966e-32 | PPP1814A | 7.08536e-13 | 4.70966e-32 | 7 | 0.415 | 6  | 4  |  |
| 7 | r8101462         | 19 | 7877371  | C   | T           | 0.4195 | 9.5e-08 | r033829  | r36035956 | SPINT2            | Transcript | INTRONIC   | intron          | RP11-436202.984  | Transcript | INTRONIC | intronic | 1 | PPP1814A | 7.08536e-13 | 4.70966e-32 | PPP1814A | 7.08536e-13 | 4.70966e-32 | 7 | 0.533 | 7  | 4  |  |
| 7 | r21435250        | 19 | 7877259  | A   | C           | 0.16   | 1.8e-06 | r0480432 | r2752345  | SPINT2            | Transcript | INTRONIC   | intron          | RP11-436202.985  | Transcript | INTRONIC | intronic | 1 | PPP1814A | 6.71177e-07 | 4.70966e-32 | PPP1814A | 6.71177e-07 | 4.70966e-32 | 7 | 0.475 | 4  | 2  |  |
| 7 | r12613084        | 19 | 7874672  | C   | A           | 0.497  | 1.2e-09 | r045505  | r4802297  | SPINT2            | Transcript | INTRONIC   | intron          | RP11-436202.986  | Transcript | INTRONIC | intronic | 1 | PPP1814A | 8.06846e-30 | 4.70966e-32 | PPP1814A | 8.06846e-30 | 4.70966e-32 | 7 | 0.304 | 26 | 1  |  |
| 7 | r4803999         | 19 | 7879765  | G   | A           | 0.34   | 8.9e-06 | r050002  | r36035956 | CTB_10215.4       | Transcript | INTRONIC   | intron          | RP11-436202.987  | Transcript | INTRONIC | intronic | 1 | PPP1814A | 1.08228e-06 | 4.70966e-32 | C10eF3   | 1.29823e-05 | 5.55572e-09 | 7 | 0.263 | 5  | 2  |  |
| 7 | r24023956        | 19 | 7879094  | C   | T           | 0.4944 | 6.1e-09 | r01      | r36035956 | SPINT2            | Transcript | INTRONIC   | intron          | RP11-436202.988  | Transcript | INTRONIC | intronic | 1 | PPP1814A | 2.05986e-15 | 4.70966e-32 | PPP1814A | 2.05986e-15 | 4.70966e-32 | 7 | 0.204 | 4  | 1  |  |
| 7 | r4584930         | 19 | 7875309  | A   | G           | 0.159  | 1.8e-06 | r074827  | r2752345  | SPINT2            | Transcript | INTRONIC   | intron          | RP11-436202.989  | Transcript | INTRONIC | intronic | 1 | PPP1814A | 6.71177e-07 | 4.70966e-32 | PPP1814A | 6.71177e-07 | 4.70966e-32 | 7 | 0.107 | 6  | 1  |  |
| 7 | r4802297         | 19 | 7878310  | C   | G           | 0.486  | 2.0e-16 | r1       | r4802297  | SPINT2            | Transcript | INTRONIC   | intron          | RP11-436202.990  | Transcript | INTRONIC | intronic | 1 | PPP1814A | 2.16735e-37 | 4.70966e-32 | PPP1814A | 2.16735e-37 | 4.70966e-32 | 7 | 0.049 | 3a | 5  |  |
| 7 | r276887          | 19 | 7879385  | C   | T           | 0.4523 | 5.1e-09 | r068046  | r36035956 | SPINT2            | Transcript | INTRONIC   | intron          | RP11-436202.991  | Transcript | INTRONIC | intronic | 1 | PPP1814A | 2.18612e-19 | 4.70966e-32 | PPP1814A | 2.18612e-19 | 4.70966e-32 | 7 | 0.049 | 4  | 1  |  |
| 7 | r11208422        | 19 | 7874930  | G   | C           | 0.2097 | 7.3e-08 | r058046  | r2752345  | SPINT2            | Transcript | INTRONIC   | intron          | RP11-436202.992  | Transcript | INTRONIC | intronic | 1 | PPP1814A | 1.84648e-06 | 4.70966e-32 | PPP1814A | 1.84648e-06 | 4.70966e-32 | 7 | 0.034 | 7  | 5  |  |
| 7 | r3543012         | 19 | 7879063  | C   | A           | 0.3509 | 8.4e-07 | r072205  | r36035956 | CTB_10215.4       | Transcript | INTRONIC   | intron          | RP11-436202.993  | Transcript | INTRONIC | intronic | 1 | PPP1814A | 3.01962e-10 | 4.70966e-32 | C10eF3   | 1.1182e-05  | 5.55572e-09 | 7 | 0.005 | 6  | 5  |  |
| 7 | r8176719         | 19 | 7861298  | TC  | C           | 0.3946 | 7.1e-12 | r055449  | r055922   | ABO               | Transcript | INTRONIC   | intron          | RP11-436202.994  | Transcript | INTRONIC | intronic | 1 | ABO      | 4.50356e-12 | 4.38373e-09 | ABO      | 4.50356e-12 | 4.38373e-09 | 8 | 10.58 | NA | 4  |  |
| 7 | r7821927         | 9  | 13613907 | G   | GAACATGCC   | 0.2823 | 4.3e-09 | r062207  | r055922   | SPINT2            | Transcript | INTRONIC   | intron          | RP11-436202.995  | Transcript | INTRONIC | intronic | 0 |          |             |             |          |             |             |   |       |    |    |  |
| 7 | r13615179        | 9  | 13615179 | T   | TGGTCGAGCCG | 0.1859 | 5.3e-09 | r1       | r057666   | RegulatoryFeature | REGULATORY | regulatory | RP11-436202.996 | Transcript       | INTRONIC   | intronic | 0        |   |          |             |             |          |             |             |   |       |    |    |  |
| 7 | r8151007         | 9  | 13615187 | T   | T           | 0.1137 | 7.1e-09 | r0151795 | r057666   | ABO               | C          | INTRONIC   | intronic        | 0                |            |          |          |   |          |             |             |          |             |             |   |       |    |    |  |
| 7 | r649129          | 9  | 13615190 | T   | C           | 0.2137 | 7.8e-09 | r0151795 | r057666   | RegulatoryFeature | REGULATORY | regulatory | RP11-436202.997 | Transcript       | INTRONIC   | intronic | 0        |   |          |             |             |          |             |             |   |       |    |    |  |
| 7 | r614605          | 9  | 13614908 | A   | T           | 0.3966 | 4.2e-11 | r031089  | r055922   | ABO               | Transcript | INTRONIC   | intron          | RP11-436202.999  | Transcript | INTRONIC | intronic | 1 | ABO      | 6.14605e-11 | 4.38373e-09 | ABO      | 6.14605e-11 | 4.38373e-09 | 8 | 7.458 | 5  | 1  |  |
| 7 | r857123          | 9  | 13613206 | A   | C           | 0.2096 | 1.1e-14 | r071464  | r055922   | ABO               | Transcript | INTRONIC   | intron          | RP11-436202.1000 | Transcript | INTRONIC | intronic | 1 | ABO      | 1.78081e-09 | 4.38373e-09 | ABO      | 1.78081e-09 | 4.38373e-09 | 8 | 7.114 | NA | 5  |  |
| 7 | r5151093         | 9  | 13614790 | T   | C           | 0.1489 | 6.1e-07 | r0151797 | r057666   | ABO               | Transcript | INTRONIC   | intron          | RP11-436202.1001 | Transcript | INTRONIC | intronic | 1 | ABO      | 6.14605e-11 | 4.38373e-09 | ABO      | 6.14605e-11 | 4.38373e-09 | 8 | 6.475 | 4  | 2  |  |
| 7 | r78182261        | 9  | 13614905 | C   | CA          | 0.3956 | 1.8e-14 | r071464  | r055922   | ABO               | Transcript | INTRONIC   | intron          | RP11-436202.1002 | Transcript | INTRONIC | intronic | 1 | ABO      | 6.14605e-11 | 4.38373e-09 | ABO      | 6.14605e-11 | 4.38373e-09 | 8 | 6.576 | NA | 1  |  |
| 7 | r600008          | 9  | 13615186 | C   | T           | 0.2147 | 8.9e-09 | r0151796 | r057666   | ABO               | Intergenic | UPSTREAM   | upstream        | RP11-436202.1003 | Transcript | INTRONIC | intronic | 0 |          |             |             |          |             |             |   |       |    |    |  |
| 7 | r484242          | 9  | 13614518 | T   | C           | 0.3996 | 7.8e-15 | r071464  | r055922   | ABO               | Transcript | INTRONIC   | intron          | RP11-436202.1004 | Transcript | INTRONIC | intronic | 0 | ABO      | 1.78081e-09 | 4.38373e-09 | ABO      | 1.78081e-09 | 4.38373e-09 | 8 | 6.180 | NA | 1  |  |
| 7 | r507666          | 9  | 13614939 | A   | G           | 0.1859 | 4.0e-09 | r1       | r057666   | ABO               | Transcript | INTRONIC   | intron          | RP11-436202.1005 | Transcript | INTRONIC | intronic | 0 |          |             |             |          |             |             |   |       |    |    |  |
| 7 | 9-13614466_CAA_C | 9  | 13614466 | C   | CAA         | 0.3837 | 1.1e-14 | r0894748 | r055922   | ABO               | Transcript | INTRONIC   | intron          | RP11-436202.1006 | Transcript | INTRONIC | intronic | 0 | ABO      | 2.3512e-11  | 4.38373e-09 | ABO      | 2.3512e-11  | 4.38373e-09 | 8 | 4.444 | 4  | 1  |  |
| 7 | r8571236         | 9  | 13613706 | A   | C           | 0.34   | 1.2e-13 | r072845  | r58770723 | ABO               | Transcript | INTRONIC   | intron          | RP11-436202.1007 | Transcript | INTRONIC | intronic | 0 | ABO      | 2.3512e-11  | 4.38373e-09 | ABO      | 2.3512e-11  | 4.38373e-09 | 8 | 4.365 | NA | 5  |  |
| 7 | r641177          | 9  | 13614504 | A   | C           | 0.34   | 1.2e-13 | r072845  | r58770723 | ABO               | Transcript | INTRONIC   | intron          | RP11-436202.1008 | Transcript | INTRONIC | intronic | 0 | ABO      | 2.3512e-11  | 4.38373e-09 | ABO      | 2.3512e-11  | 4.38373e-09 | 8 | 4.329 | 3a | 3  |  |
| 7 | r79209625        | 9  | 13614400 | C   | CA          | 0.3838 | 1.6e-12 | r078813  | r055922   | ABO               | Transcript | INTRONIC   | intron          | RP11-436202.1009 | Transcript | INTRONIC | intronic | 0 | ABO      | 1.48778e-11 | 4.38373e-09 | ABO      | 1.48778e-11 | 4.38373e-09 | 8 | 1.737 | NA | 5  |  |
| 7 | r554883          | 9  | 13647460 | T   | C           | 0.2718 | 9.1e-15 | r0584746 | r055922   | ABO               | Transcript | INTRONIC   | intron          | RP11-436202.1010 | Transcript | INTRONIC | intronic | 0 | ABO      | 1.48778e-11 | 4.38373e-09 | ABO      | 1.48778e-11 | 4.38373e-09 | 8 | 1.297 | NA | 4  |  |
| 7 | r641626          | 9  | 13614873 | T   | C           | 0.3708 | 1.0e-14 | r058481  | r055922   | ABO               | Transcript | INTRONIC   | intron          | RP11-436202.1011 | Transcript | INTRONIC | intronic | 1 | ABO      | 2.66939e-10 | 4.38373e-09 | ABO      | 2.66939e-10 | 4.38373e-09 | 8 | 3.995 | 4  | 1  |  |
| 7 | r597988          | 9  | 13614284 | A   | T           | 0.3698 | 1.0e-14 | r077064  | r055922   | ABO               | Transcript | INTRONIC   | intron          | RP11-436202.1012 | Transcript | INTRONIC | intronic | 1 | ABO      | 2.66939e-10 | 4.38373e-09 | ABO      | 2.66939e-10 | 4.38373e-09 | 8 | 3.1   |    |    |  |

|   |            |   |           |        |     |        |         |            |              |            |                  |            |                           |                 |            |          |          |       |       |    |   |
|---|------------|---|-----------|--------|-----|--------|---------|------------|--------------|------------|------------------|------------|---------------------------|-----------------|------------|----------|----------|-------|-------|----|---|
| 9 | r158193643 | 7 | 102010094 | G      | T   | 0.1392 | 2.2e-06 | 0.731687   | r2537428     | FBXL13     | Transcript       | INTRONIC   | intron                    | RP11-43623.1089 | Transcript | INTRONIC | INTRONIC | 0     | 7.286 | 3a | 2 |
| 9 | r10953380  | 7 | 102747149 | G      | C   | 0.3191 | 1.2e-07 | 0.674445   | r142441296   | NAPFLD     | Transcript       | INTRONIC   | intron                    | RP11-43623.1090 | Transcript | INTRONIC | INTRONIC | 0     | 7.254 | 4  | 1 |
| 9 | r13178117  | 7 | 102050113 | G      | T   | 0.1392 | 1.0e-06 | 0.731687   | r2537428     | FBXL13     | Transcript       | INTRONIC   | intron                    | RP11-43623.1091 | Transcript | INTRONIC | INTRONIC | 0     | 7.244 | 4  | 1 |
| 9 | r133240483 | 7 | 102048043 | G      | T   | 0.2356 | 2.8e-11 | r131242403 | FBXL13       | Transcript | INTRONIC         | intron     | RP11-43623.1092           | Transcript      | INTRONIC   | INTRONIC | 0        | 7.052 | 6     | 4  |   |
| 9 | r10273949  | 7 | 102462636 | G      | T   | 0.3181 | 1.2e-14 | 0.968807   | 7102474902_T | FBXL13     | CodingTranscript | SYNONYMOUS | synonymous                | RP11-43623.1093 | Transcript | INTRONIC | INTRONIC | 0     | 6.931 | 2c | 4 |
| 9 | r14580325  | 7 | 102423025 | G      | T   | 0.1163 | 2.0e-05 | 0.545667   | r2537428     | FAM185A    | Transcript       | INTRONIC   | intron                    | RP11-43623.1104 | Transcript | INTRONIC | INTRONIC | 0     | 6.903 | 7  | 4 |
| 9 | r17789252  | 7 | 102624272 | A      | C   | 0.3062 | 1.6e-07 | 0.720127   | r142441296   | FBXL13     | Transcript       | INTRONIC   | intron                    | RP11-43623.1105 | Transcript | INTRONIC | INTRONIC | 0     | 6.740 | 4  | 5 |
| 9 | r17176090  | 7 | 102475673 | A      | G   | 0.1193 | 6.4e-09 | 0.518163   | r2537428     | FBXL13     | Transcript       | INTRONIC   | intron                    | RP11-43623.1106 | Transcript | INTRONIC | INTRONIC | 0     | 6.621 | 2b | 1 |
| 9 | r171210195 | 7 | 102470002 | G      | T   | 0.3211 | 7.7e-15 | r131242403 | FBXL13       | Transcript | INTRONIC         | intron     | RP11-43623.1107           | Transcript      | INTRONIC   | INTRONIC | 0        | 6.584 | 3b    | 5  |   |
| 9 | r19601949  | 7 | 102425093 | C      | T   | 0.1163 | 3.3e-09 | 0.943657   | r2537428     | FAM185A    | Transcript       | INTRONIC   | intron                    | RP11-43623.1108 | Transcript | INTRONIC | INTRONIC | 0     | 6.412 | 7  | 5 |
| 9 | r16165167  | 7 | 102479719 | C      | C   | 0.1193 | 7.5e-09 | 0.518163   | r2537428     | FBXL13     | Transcript       | INTRONIC   | intron                    | RP11-43623.1109 | Transcript | INTRONIC | INTRONIC | 0     | 6.289 | 6  | 5 |
| 9 | r11184346  | 7 | 102479702 | C      | C   | 0.1362 | 2.8e-06 | 0.732073   | r2537428     | FBXL13     | Transcript       | INTRONIC   | intron                    | RP11-43623.1110 | Transcript | INTRONIC | INTRONIC | 0     | 6.261 | 4  | 1 |
| 9 | r15615624  | 7 | 102472408 | C      | T   | 0.1163 | 6.8e-09 | 0.943657   | r2537428     | FAM185A    | Transcript       | INTRONIC   | intron                    | RP11-43623.1111 | Transcript | INTRONIC | INTRONIC | 0     | 6.146 | 5  | 5 |
| 9 | r184748    | 7 | 10251580  | T      | C   | 0.3191 | 2.6e-10 | 0.897336   | r142441296   | URC17      | Transcript       | INTRONIC   | intron                    | RP11-43623.1102 | Transcript | INTRONIC | INTRONIC | 0     | 6.137 | 7  | 1 |
| 9 | r12518995  | 7 | 102416004 | A      | T   | 0.1163 | 6.3e-09 | 0.90895    | r2537428     | FBXL13     | Transcript       | INTRONIC   | intron                    | RP11-43623.1103 | Transcript | INTRONIC | INTRONIC | 0     | 6.030 | 7  | 4 |
| 9 | r4691288   | 7 | 102479510 | A      | T   | 0.1183 | 1.5e-09 | 0.731687   | r2537428     | FBXL13     | Transcript       | INTRONIC   | intron                    | RP11-43623.1104 | Transcript | INTRONIC | INTRONIC | 0     | 5.998 | 4  | 5 |
| 9 | r154079580 | 7 | 102441168 | GAAAC  | G   | 0.1203 | 7.5e-09 | 0.910217   | r2537428     | FAM185A    | Transcript       | INTRONIC   | intron,feature_elongation | RP11-43623.1105 | Transcript | INTRONIC | INTRONIC | 0     | 5.896 | NA | 5 |
| 9 | r1100046   | 7 | 102540925 | A      | T   | 0.3201 | 2.7e-10 | 0.901907   | r142441296   | FBXL13     | Transcript       | INTRONIC   | intron                    | RP11-43623.1106 | Transcript | INTRONIC | INTRONIC | 0     | 5.888 | 5  | 4 |
| 9 | r1931360   | 7 | 102440016 | A      | T   | 0.1143 | 1.2e-09 | 0.764517   | r2537428     | FAM185A    | Transcript       | INTRONIC   | intron                    | RP11-43623.1107 | Transcript | INTRONIC | INTRONIC | 0     | 5.798 | NA | 5 |
| 9 | r6800434   | 7 | 102420701 | T      | A   | 0.3141 | 1.1e-13 | 0.92035    | 7102474902_T | FAM185A    | Transcript       | INTRONIC   | intron                    | RP11-43623.1108 | Transcript | INTRONIC | INTRONIC | 0     | 5.660 | 5  | 4 |
| 9 | r11983521  | 7 | 102498173 | T      | C   | 0.1362 | 1.3e-06 | 0.752073   | r2537428     | FBXL13     | Transcript       | INTRONIC   | intron                    | RP11-43623.1109 | Transcript | INTRONIC | INTRONIC | 0     | 5.515 | 6  | 5 |
| 9 | r17408280  | 7 | 10257190  | C      | C   | 0.1362 | 6.9e-06 | 0.721054   | r2537428     | URC17      | Transcript       | INTRONIC   | intron                    | RP11-43623.1110 | Transcript | INTRONIC | INTRONIC | 0     | 5.483 | 5  | 2 |
| 9 | r2411059   | 7 | 102594612 | C      | C   | 0.1402 | 8.3e-06 | 0.739495   | r2537428     | FBXL13     | Transcript       | INTRONIC   | intron                    | RP11-43623.1111 | Transcript | INTRONIC | INTRONIC | 0     | 5.458 | 6  | 5 |
| 9 | r13212185  | 7 | 102678422 | C      | C   | 0.3111 | 2.3e-07 | 0.72381    | r142441296   | FBXL13     | Transcript       | INTRONIC   | intron                    | RP11-43623.1112 | Transcript | INTRONIC | INTRONIC | 0     | 5.305 | 5  | 1 |
| 9 | r14782634  | 7 | 102435448 | A      | G   | 0.1213 | 1.1e-08 | 0.917123   | r2537428     | FAM185A    | Transcript       | INTRONIC   | intron                    | RP11-43623.1113 | Transcript | INTRONIC | INTRONIC | 0     | 5.278 | 4  | 5 |
| 9 | r6897771   | 7 | 102545179 | C      | T   | 0.1362 | 7.2e-06 | 0.721054   | r2537428     | FBXL13     | Transcript       | INTRONIC   | intron                    | RP11-43623.1114 | Transcript | INTRONIC | INTRONIC | 0     | 5.263 | 6  | 5 |
| 9 | r61679881  | 7 | 102509433 | T      | T   | 0.1392 | 3.1e-04 | 0.733687   | r2537428     | FBXL13     | Transcript       | INTRONIC   | intron                    | RP11-43623.1115 | Transcript | INTRONIC | INTRONIC | 0     | 5.192 | 4  | 5 |
| 9 | r6877451   | 7 | 102504206 | G      | A   | 0.1292 | 2.2e-06 | 0.733687   | r2537428     | FBXL13     | Transcript       | INTRONIC   | intron                    | RP11-43623.1116 | Transcript | INTRONIC | INTRONIC | 0     | 5.167 | 6  | 5 |
| 9 | r5725366   | 7 | 10248664  | T      | C   | 0.1193 | 9.1e-09 | 0.918632   | r2537428     | FBXL13     | Transcript       | INTRONIC   | intron                    | RP11-43623.1117 | Transcript | INTRONIC | INTRONIC | 0     | 5.090 | 5  | 4 |
| 9 | r2411046   | 7 | 102419304 | A      | C   | 0.3141 | 1.6e-13 | 0.92035    | 7102474902_T | FAM185A    | Transcript       | INTRONIC   | intron                    | RP11-43623.1118 | Transcript | INTRONIC | INTRONIC | 0     | 5.022 | 5  | 4 |
| 9 | r1847658   | 7 | 102561544 | A      | T   | 0.1402 | 7.5e-06 | 0.739495   | r2537428     | URC17      | Transcript       | INTRONIC   | intron                    | RP11-43623.1119 | Transcript | INTRONIC | INTRONIC | 0     | 4.984 | NA | 5 |
| 9 | r13121394  | 7 | 102742554 | A      | C   | 0.3002 | 4.5e-08 | 0.720127   | r142441296   | NAPFLD     | Transcript       | INTRONIC   | UTR                       | RP11-43623.1120 | Transcript | INTRONIC | INTRONIC | 0     | 4.957 | 6  | 4 |
| 9 | r131770139 | 7 | 102770170 | G      | C   | 0.3191 | 1.2e-07 | 0.718031   | r142441296   | NAPFLD     | Transcript       | INTRONIC   | intron                    | RP11-43623.1121 | Transcript | INTRONIC | INTRONIC | 0     | 4.933 | 5  | 5 |
| 9 | r64645971  | 7 | 102441180 | T      | G   | 0.1181 | 1.1e-14 | 0.918632   | 7102474902_T | FAM185A    | Transcript       | INTRONIC   | intron                    | RP11-43623.1122 | Transcript | INTRONIC | INTRONIC | 0     | 4.903 | 5  | 5 |
| 9 | r11342493  | 7 | 102584013 | G      | A   | 0.1402 | 8.4e-06 | 0.739495   | r2537428     | URC17      | Transcript       | INTRONIC   | intron                    | RP11-43623.1123 | Transcript | INTRONIC | INTRONIC | 0     | 4.865 | 5  | 1 |
| 9 | r147068151 | 7 | 102497658 | CACAAA | A   | 0.1362 | 2.4e-06 | 0.752073   | r2537428     | FBXL13     | Transcript       | INTRONIC   | intron,feature_elongation | RP11-43623.1124 | Transcript | INTRONIC | INTRONIC | 0     | 4.673 | NA | 5 |
| 9 | r57453534  | 7 | 102501273 | A      | G   | 0.1392 | 1.2e-06 | 0.733687   | r2537428     | FBXL13     | Transcript       | INTRONIC   | intron                    | RP11-43623.1125 | Transcript | INTRONIC | INTRONIC | 0     | 4.656 | 4  | 5 |
| 9 | r6804928   | 7 | 102589706 | G      | T   | 0.3211 | 4.8e-10 | 0.897336   | r142441296   | FBXL13     | Transcript       | INTRONIC   | intron                    | RP11-43623.1126 | Transcript | INTRONIC | INTRONIC | 0     | 4.624 | 5  | 4 |
| 9 | r7777618   | 7 | 102512122 | G      | C   | 0.1392 | 3.6e-06 | 0.733687   | r2537428     | FBXL13     | Transcript       | INTRONIC   | intron                    | RP11-43623.1127 | Transcript | INTRONIC | INTRONIC | 0     | 4.406 | 7  | 4 |
| 9 | r11973896  | 7 | 102498441 | G      | A   | 0.1372 | 1.9e-06 | 0.761256   | r2537428     | FBXL13     | Transcript       | INTRONIC   | intron                    | RP11-43623.1128 | Transcript | INTRONIC | INTRONIC | 0     | 4.368 | 7  | 5 |
| 9 | r57516389  | 7 | 102593073 | T      | C   | 0.1362 | 8.6e-06 | 0.721054   | r2537428     | FBXL13     | Transcript       | INTRONIC   | intron                    | RP11-43623.1129 | Transcript | INTRONIC | INTRONIC | 0     | 4.307 | 5  | 5 |
| 9 | r777619    | 7 | 10248906  | G      | C   | 0.3141 | 9.3e-14 | 0.924671   | 7102474902_T | FAM185A    | Transcript       | INTRONIC   | intron                    | RP11-43623.1130 | Transcript | INTRONIC | INTRONIC | 0     | 4.285 | 5  | 5 |
| 9 | r6849997   | 7 | 10261958  | T      | C   | 0.1402 | 8.3e-06 | 0.739495   | r2537428     | FBXL13     | Transcript       | INTRONIC   | intron                    | RP11-43623.1131 | Transcript | INTRONIC | INTRONIC | 0     | 4.267 | 5  | 1 |
| 9 | r1182880   | 7 | 102464020 | G      | T   | 0.1292 | 6.5e-09 | 0.918632   | r2537428     | FBXL13     | Transcript       | INTRONIC   | intron                    | RP11-43623.1132 | Transcript | INTRONIC | INTRONIC | 0     | 4.218 | 6  | 5 |
| 9 | r6861304   | 7 | 102483152 | A      | C   | 0.3718 | 2.3e-07 | 0.781433   | r133232414   | FBXL13     | Transcript       | INTRONIC   | intron                    | RP11-43623.1133 | Transcript | INTRONIC | INTRONIC | 0     | 4.135 | 6  | 5 |
| 9 | r9778444   | 7 | 102425822 | G      | A   | 0.1163 | 4.2e-09 | 0.943657   | r2537428     | FAM185A    | Transcript       | INTRONIC   | intron                    | RP11-43623.1134 | Transcript | INTRONIC | INTRONIC | 0     | 4.097 | 7  | 5 |
| 9 | r10282345  | 7 | 102492378 | A      | C   | 0.4573 | 1.2e-07 | 0.721554   | r133232414   | FBXL13     | Transcript       | INTRONIC   | intron,feature_elongation | RP11-43623.1135 | Transcript | INTRONIC | INTRONIC | 0     | 4.024 | NA | 5 |
| 9 | r10206873  | 7 | 102476120 | G      | A   | 0.3191 | 2.1e-14 | 0.977011   | 7102474902_T | FAM185A    | Transcript       | INTRONIC   | intron                    | RP11-43623.1136 | Transcript | INTRONIC | INTRONIC | 0     | 3.965 | 6  | 5 |
| 9 | r1461704   | 7 | 102423618 | A      | G   | 0.1131 | 1.9e-09 | 0.971223   | r2537428     | FAM185A    | Transcript       | INTRONIC   | intron                    | RP11-43623.1137 | Transcript | INTRONIC | INTRONIC | 0     | 3.951 | 7  | 5 |
| 9 | r168067024 | 7 | 102490724 | A      | G   | 0.1402 | 1.0e-06 | 0.739495   | r2537428     | URC17      | Transcript       | INTRONIC   | intron                    | RP11-43623.1138 | Transcript | INTRONIC | INTRONIC | 0     | 3.922 | 5  | 5 |
| 9 | r12519777  | 7 | 102519210 | C      | C   | 0.3201 | 1.2e-10 | 0.901907   | r142441296   | FBXL13     | Transcript       | INTRONIC   | intron                    | RP11-43623.1139 | Transcript | INTRONIC | INTRONIC | 0     | 3.907 | 4  | 5 |
| 9 | r1640579   | 7 | 10204773  | G      | A   | 0.1392 | 1.1e-06 | 0.733687   | r2537428     | FBXL13     | Transcript       | INTRONIC   | intron                    | RP11-43623.1140 | Transcript | INTRONIC | INTRONIC | 0     | 3.881 | 7  | 4 |
| 9 | r1266968   | 7 | 102471349 | A      | A   | 0.1183 | 6.4e-09 | 0.90895    | r2537428     | FBXL13     | Transcript       | INTRONIC   | intron                    | RP11-43623.1141 | Transcript | INTRONIC | INTRONIC | 0     | 3.864 | 6  | 4 |
| 9 | r11077157  | 7 | 102572915 | G      | C   | 0.34   | 8.1e-12 | 0.861093   | 7102474902_T | FBXL13     | Transcript       | INTRONIC   | intron                    | RP11-43623.1142 | Transcript | INTRONIC | INTRONIC | 0     | 3.798 | 5  | 4 |
| 9 | r16465885  | 7 | 102574313 | T      | C   | 0.1362 | 9.4e-06 | 0.721054   | r2537428     | URC17      | Transcript       | INTRONIC   | intron                    | RP11-43623.1143 | Transcript | INTRONIC | INTRONIC | 0     | 3.795 | 5  | 5 |
| 9 | r12684814  | 7 | 10247674  | A      | G   | 0.1193 | 6.4e-09 | 0.918632   | r2537428     | FBXL13     | Transcript       | INTRONIC   | intron                    | RP11-43623.1144 | Transcript | INTRONIC | INTRONIC | 0     | 3.722 | 6  | 4 |
| 9 | r102501445 | 7 | 10201044  | C      | CAT | 0.1392 | 2.5e-06 | 0.733687   | r2537428     | FBXL13     | Transcript       | INTRONIC   | intron,feature_truncation | RP11-43623.1145 | Transcript | INTRONIC | INTRONIC | 0     | 3.677 | NA | 5 |
| 9 | r17456502  | 7 | 102596022 | A      | C   | 0.2944 | 6.3e-10 | 0.896029   | r142441296   | FBXL13     | Transcript       | INTRONIC   | intron                    | RP11-43623.1146 | Transcript | INTRONIC | INTRONIC | 0     | 3.639 | 6  | 5 |
| 9 | r6404877   | 7 | 102504613 | C      | T   | 0.1392 | 1.3e-06 | 0.733687   | r2537428     | FBXL13     | Transcript       | INTRONIC   | intron                    | RP11-43623.1147 | Transcript | INTRONIC | INTRONIC | 0     | 3.439 | 5  | 4 |
| 9 | r102613174 | 7 | 102442173 | A      | C   | 0.3171 | 2.7e-14 | 0.964276   | 7102474902_T | FAM185A    | Transcript       | INTRONIC   | intron                    | RP11-43623.1148 | Transcript | INTRONIC | INTRONIC | 0     | 3.409 | 5  | 5 |
| 9 | r2430070   | 7 | 102420805 | G      | T   | 0.3131 | 8.1e-14 | 0.920502   | 7102474902_T | FAM185A    | Transcript       | INTRONIC   | intron                    | RP11-43623.1149 | Transcript | INTRONIC | INTRONIC | 0     | 3.388 | NA | 5 |
| 9 |            |   |           |        |     |        |         |            |              |            |                  |            |                           |                 |            |          |          |       |       |    |   |

[illegible]

[illegible]

|    |            |                    |       |                                    |               |                   |                  |            |                  |            |          |          |       |                        |       |                        |     |                        |
|----|------------|--------------------|-------|------------------------------------|---------------|-------------------|------------------|------------|------------------|------------|----------|----------|-------|------------------------|-------|------------------------|-----|------------------------|
| 13 | r6884008   | 10 101450604 G     | A     | 0.1213 3.6e-13 0.990447 r57089322  | ENTP07        | Transcript        | INTRONIC         | intron     | RP11-436021.1452 | Transcript | INTRONIC | intronic | 0     | 13                     | 1.496 | 6                      | 4   |                        |
| 13 | r2300982   | 10 101454142 G     | A     | 0.1213 4.0e-13 0.990447 r57089322  | ENTP07        | Transcript        | INTRONIC         | intron     | RP11-436021.1453 | Transcript | INTRONIC | intronic | 0     | 13                     | 1.490 | 5                      | 2   |                        |
| 13 | r4893382   | 10 101454900 C     | T     | 0.1213 3.0e-13 0.990447 r57089322  | ENTP07        | Transcript        | INTRONIC         | intron     | RP11-436021.1454 | Transcript | INTRONIC | intronic | 0     | 13                     | 1.395 | 4                      | 3   |                        |
| 13 | r5708937   | 10 101454908 G     | A     | 0.1203 3.7e-13 0.980842 r57089322  | ENTP07        | Transcript        | INTRONIC         | intron     | RP11-436021.1455 | Transcript | INTRONIC | intronic | 0     | 13                     | 1.368 | 7                      | 5   |                        |
| 13 | r4951983   | 10 101455100 A     | T     | 0.1213 2.5e-13 0.990447 r57089322  | ENTP07        | Transcript        | INTRONIC         | intron     | RP11-436021.1456 | Transcript | INTRONIC | intronic | 0     | 13                     | 1.329 | 7                      | 4   |                        |
| 13 | r5707450   | 10 101394724 C     | T     | 0.1203 1.2e-13 0.990447 r57089322  | ENTP07        | Transcript        | INTRONIC         | intron     | RP11-436021.1457 | Transcript | INTRONIC | intronic | 0     | 13                     | 1.242 | 3                      | 3   |                        |
| 13 | r5199941   | 10 101412471 G     | A     | 0.1213 1.6e-13 0.990447 r57089322  | ENTP07        | Transcript        | INTRONIC         | intron     | RP11-436021.1458 | Transcript | INTRONIC | intronic | 0     | 13                     | 1.223 | 7                      | 5   |                        |
| 13 | r6844001   | 10 101388939 G     | A     | 0.1203 1.0e-13 1 r57089322         | ENTP07        | Transcript        | INTRONIC         | intron     | RP11-436021.1459 | Transcript | INTRONIC | intronic | 0     | 13                     | 1.214 | 5                      | 5   |                        |
| 13 | r5707594   | 10 101391829 G     | A     | 0.1203 1.4e-13 1 r57089322         | ENTP07        | Transcript        | INTRONIC         | intron     | RP11-436021.1460 | Transcript | INTRONIC | intronic | 0     | 13                     | 1.213 | 6                      | 4   |                        |
| 13 | r5718139   | 10 101465780 A     | G     | 0.1213 3.2e-13 0.990447 r57089322  | ENTP07        | Transcript        | INTRONIC         | intron     | RP11-436021.1461 | Transcript | INTRONIC | intronic | 0     | 13                     | 1.170 | 6                      | 4   |                        |
| 13 | r4951980   | 10 101425578 C     | A     | 0.1213 1.6e-13 0.990447 r57089322  | ENTP07        | Transcript        | INTRONIC         | intron     | RP11-436021.1462 | Transcript | INTRONIC | intronic | 0     | 13                     | 1.165 | 5                      | 4   |                        |
| 13 | r5135116   | 10 101381601 T     | T     | 0.1203 2.1e-13 1 r57089322         | ENTP07        | Transcript        | INTRONIC         | intron     | RP11-436021.1463 | Transcript | INTRONIC | intronic | 0     | 13                     | 1.157 | 7                      | 4   |                        |
| 13 | r5663888   | 10 101402630 G     | A     | 0.1213 1.8e-13 0.990447 r57089322  | ENTP07        | Transcript        | INTRONIC         | intron     | RP11-436021.1464 | Transcript | INTRONIC | intronic | 0     | 13                     | 1.028 | 6                      | 5   |                        |
| 13 | r2269194   | 10 101457155 G     | A     | 0.1213 2.2e-13 0.990447 r57089322  | ENTP07        | Transcript        | INTRONIC         | intron     | RP11-436021.1465 | Transcript | INTRONIC | intronic | 0     | 13                     | 0.962 | 7                      | 4   |                        |
| 13 | r5663958   | 10 101401808 G     | A     | 0.1213 1.9e-13 0.990447 r57089322  | ENTP07        | Transcript        | INTRONIC         | intron     | RP11-436021.1466 | Transcript | INTRONIC | intronic | 0     | 13                     | 0.953 | 7                      | 5   |                        |
| 13 | r5705415   | 10 101405244 A     | G     | 0.1203 3.7e-13 0.980842 r57089322  | ENTP07        | Transcript        | INTRONIC         | intron     | RP11-436021.1467 | Transcript | INTRONIC | intronic | 0     | 13                     | 0.883 | 7                      | 5   |                        |
| 13 | r5103217   | 10 101386400 G     | T     | 0.1233 3.3e-13 0.971763 r57089322  | RP11-85A1.3   | Transcript        | INTRONIC         | downstream | RP11-436021.1468 | Transcript | INTRONIC | intronic | 0     | 13                     | 0.831 | NA                     | 5   |                        |
| 13 | r5663384   | 10 101401622 C     | T     | 0.1213 1.9e-13 0.990447 r57089322  | ENTP07        | Transcript        | INTRONIC         | intron     | RP11-436021.1469 | Transcript | INTRONIC | intronic | 0     | 13                     | 0.784 | 5                      | 5   |                        |
| 13 | r51088402  | 10 101426527 G     | A     | 0.1213 2.1e-13 0.990447 r57089322  | ENTP07        | Transcript        | INTRONIC         | intron     | RP11-436021.1470 | Transcript | INTRONIC | intronic | 0     | 13                     | 0.675 | 6                      | 4   |                        |
| 13 | r511542    | 10 101433672 C     | G     | 0.1213 5.5e-13 0.990447 r57089322  | ENTP07        | Transcript        | INTRONIC         | intron     | RP11-436021.1471 | Transcript | INTRONIC | intronic | 0     | 13                     | 0.638 | 5                      | 4   |                        |
| 13 | r51142827  | 10 101425013 GA    | A     | 0.1202 1.5e-13 0.999542 r57089322  | ENTP07        | Transcript        | INTRONIC         | intron     | RP11-436021.1472 | Transcript | INTRONIC | intronic | 0     | 13                     | 0.627 | NA                     | 4   |                        |
| 13 | r51193041  | 10 101437177 G     | A     | 0.1213 2.1e-13 0.990447 r57089322  | ENTP07        | Transcript        | INTRONIC         | intron     | RP11-436021.1473 | Transcript | INTRONIC | intronic | 0     | 13                     | 0.627 | 7                      | 4   |                        |
| 13 | r5118001   | 10 101389084 C     | T     | 0.1203 1.3e-13 1 r57089322         | ENTP07        | Transcript        | INTRONIC         | intron     | RP11-436021.1474 | Transcript | INTRONIC | intronic | 0     | 13                     | 0.545 | 4                      | 1   |                        |
| 13 | r51074787  | 10 101449597 G     | A     | 0.1203 8.0e-13 0.980842 r57089322  | ENTP07        | Transcript        | INTRONIC         | intron     | RP11-436021.1475 | Transcript | INTRONIC | intronic | 0     | 13                     | 0.503 | 7                      | 4   |                        |
| 13 | r51999440  | 10 101412278 T     | G     | 0.1213 9.8e-14 0.990447 r57089322  | RP11-483F11.7 | Transcript        | INTRONIC         | intron     | RP11-436021.1476 | Transcript | INTRONIC | intronic | 0     | 13                     | 0.491 | 7                      | 5   |                        |
| 13 | r51119038  | 10 101391648 T     | A     | 0.1213 2.0e-13 0.951948 r57089322  | ENTP07        | Transcript        | INTRONIC         | intron     | RP11-436021.1477 | Transcript | INTRONIC | intronic | 0     | 13                     | 0.428 | 6                      | 5   |                        |
| 13 | r6858420   | 10 101481767 T     | C     | 0.1213 2.3e-13 0.990447 r57089322  | COX15         | RegulatoryFeature | REGULATORY       | intron     | RP11-436021.1478 | Transcript | INTRONIC | intronic | 0     | 13                     | 0.403 | 6                      | 4   |                        |
| 13 | r514717923 | 10 101414414 TAAc  | T     | 0.1531 2.6e-13 0.765572 r57089322  | ENTP07        | Transcript        | INTRONIC         | intron     | RP11-436021.1479 | Transcript | INTRONIC | intronic | 0     | 13                     | 0.356 | NA                     | 2   |                        |
| 13 | r4951979   | 10 101425468 T     | C     | 0.1213 3.6e-13 0.990447 r57089322  | ENTP07        | Transcript        | INTRONIC         | intron     | RP11-436021.1480 | Transcript | INTRONIC | intronic | 0     | 13                     | 0.347 | 5                      | 4   |                        |
| 13 | r51430810  | 10 101391899 AATAG | A     | 0.1237 2.4e-13 0.971119 r57089322  | ENTP07        | Transcript        | INTRONIC         | intron     | RP11-436021.1481 | Transcript | INTRONIC | intronic | 0     | 13                     | 0.300 | 7                      | 4   |                        |
| 13 | r512181543 | 10 101367042 A     | G     | 0.1153 3.8e-13 0.877874 r57089322  | ENTP07        | Transcript        | INTRONIC         | intron     | RP11-436021.1482 | Transcript | INTRONIC | intronic | 0     | 13                     | 0.277 | 6                      | 5   |                        |
| 13 | r5791939   | 10 101427983 C     | T     | 0.1213 4.0e-13 0.990447 r57089322  | ENTP07        | Transcript        | INTRONIC         | intron     | RP11-436021.1483 | Transcript | INTRONIC | intronic | 0     | 13                     | 0.280 | 7                      | 4   |                        |
| 13 | r4918178   | 10 101418180 G     | A     | 0.1203 7.6e-13 0.980842 r57089322  | ENTP07        | Transcript        | INTRONIC         | intron     | RP11-436021.1484 | Transcript | INTRONIC | intronic | 0     | 13                     | 0.226 | 6                      | 4   |                        |
| 13 | r5177144   | 10 101389700 A     | A     | 0.1223 8.7e-14 0.981015 r57089322  | ENTP07        | Transcript        | INTRONIC         | intron     | RP11-436021.1485 | Transcript | INTRONIC | intronic | 0     | 13                     | 0.190 | 3a                     | 3   |                        |
| 13 | r5663403   | 10 101402896 C     | T     | 0.1213 2.5e-13 0.990447 r57089322  | ENTP07        | Transcript        | INTRONIC         | intron     | RP11-436021.1486 | Transcript | INTRONIC | intronic | 0     | 13                     | 0.184 | 7                      | 5   |                        |
| 13 | r5790566   | 10 101405335 A     | G     | 0.1213 1.8e-13 0.990447 r57089322  | ENTP07        | Transcript        | INTRONIC         | intron     | RP11-436021.1487 | Transcript | INTRONIC | intronic | 0     | 13                     | 0.162 | 7                      | 5   |                        |
| 13 | r51360921  | 10 101435311 G     | A     | 0.1213 3.0e-13 0.990447 r57089322  | ENTP07        | Transcript        | INTRONIC         | intron     | RP11-436021.1488 | Transcript | INTRONIC | intronic | 0     | 13                     | 0.143 | 7                      | 5   |                        |
| 13 | r57717085  | 10 101401435 C     | T     | 0.1213 1.8e-13 0.990447 r57089322  | ENTP07        | Transcript        | INTRONIC         | intron     | RP11-436021.1489 | Transcript | INTRONIC | intronic | 0     | 13                     | 0.110 | 6                      | 5   |                        |
| 13 | r57086162  | 10 101405998 A     | G     | 0.1213 9.7e-14 0.990447 r57089322  | ENTP07        | Transcript        | INTRONIC         | intron     | RP11-436021.1490 | Transcript | INTRONIC | intronic | 0     | 13                     | 0.087 | 6                      | 5   |                        |
| 13 | r5708086   | 10 101447258 T     | A     | 0.1233 2.2e-13 0.990447 r57089322  | ENTP07        | Transcript        | INTRONIC         | intron     | RP11-436021.1491 | Transcript | INTRONIC | intronic | 0     | 13                     | 0.080 | 7                      | 4   |                        |
| 13 | r684296    | 10 101357014 T     | A     | 0.1372 1.1e-13 0.729242 r57089322  | intronic3     | Intergenic        | UPSTREAM         | upstream   | RP11-436021.1492 | Transcript | INTRONIC | intronic | 0     | 13                     | 0.080 | 6                      | 5   |                        |
| 13 | r5185493   | 10 101987272 G     | A     | 0.1203 6.5e-14 1 r57089322         | ENTP07        | Transcript        | INTRONIC         | intron     | RP11-436021.1493 | Transcript | INTRONIC | intronic | 0     | 13                     | 0.076 | 6                      | 5   |                        |
| 13 | r570979    | 10 101387058 G     | A     | 0.1203 1.0e-13 1 r57089322         | ENTP07        | Transcript        | INTRONIC         | intron     | RP11-436021.1494 | Transcript | INTRONIC | intronic | 0     | 13                     | 0.076 | 6                      | 5   |                        |
| 13 | r2262278   | 10 101489868 C     | COX15 | Transcript                         | INTRONIC      | intron            | RP11-436021.1495 | Transcript | INTRONIC         | intronic   | 0        | 13       | 0.044 | 7                      | 4     |                        |     |                        |
| 13 | r5556472   | 10 101400471 C     | G     | 0.1213 1.9e-13 0.990447 r57089322  | ENTP07        | Transcript        | INTRONIC         | intron     | RP11-436021.1496 | Transcript | INTRONIC | intronic | 0     | 13                     | 0.023 | 7                      | 5   |                        |
| 13 | r511782146 | 10 120411922 G     | A     | 0.1849 7.1e-13 0.729943 r68089342  | NOV           | Transcript        | INTRONIC         | intron     | RP11-436021.1497 | Transcript | INTRONIC | intronic | NOV   | 2.9388e-11 5.0495e-07  | NOV   | 2.9388e-11 5.0495e-07  | NOV | 2.9388e-11 5.0495e-07  |
| 13 | r51178373  | 8 120434942 T      | C     | 0.1839 1.8e-13 0.786269 r68089342  | RP11-77B515.2 | Transcript        | INTRONIC         | intron     | RP11-436021.1498 | Transcript | INTRONIC | intronic | NOV   | 8.92118e-10 5.0495e-07 | NOV   | 8.92118e-10 5.0495e-07 | NOV | 8.92118e-10 5.0495e-07 |
| 13 | r57170783  | 8 120420884 T      | A     | 0.1849 1.1e-13 0.789163 r68089342  | RP11-77B515.2 | Transcript        | INTRONIC         | intron     | RP11-436021.1499 | Transcript | INTRONIC | intronic | NOV   | 1.36347e-10 5.0495e-07 | NOV   | 1.36347e-10 5.0495e-07 | NOV | 1.36347e-10 5.0495e-07 |
| 13 | r511571242 | 8 120421447 T      | A     | 0.1839 1.0e-13 0.786269 r68089342  | NOV           | Transcript        | INTRONIC         | intron     | RP11-436021.1500 | Transcript | INTRONIC | intronic | NOV   | 4.45041e-11 5.0495e-07 | NOV   | 4.45041e-11 5.0495e-07 | NOV | 4.45041e-11 5.0495e-07 |
| 13 | r51191747  | 8 120542085 A      | G     | 0.2137 1.3e-13 1 r517191747        | ENTP07        | Transcript        | INTRONIC         | intron     | RP11-436021.1501 | Transcript | INTRONIC | intronic | NOV   | 3.6574e-07 5.0495e-07  | NOV   | 3.6574e-07 5.0495e-07  | NOV | 3.6574e-07 5.0495e-07  |
| 13 | r5105813   | 8 120575184 A      | G     | 0.1948 2.5e-13 0.858811 r517191747 | ENTP2         | CodingTranscript  | SYNONYMOUS       | synonymous | RP11-436021.1502 | Transcript | INTRONIC | intronic | NOV   | 4.7025e-07 5.0495e-07  | NOV   | 4.7025e-07 5.0495e-07  | NOV | 4.7025e-07 5.0495e-07  |
| 13 | r5106710   | 8 120624386 T      | A     | 0.1216 4.2e-13 0.746421 G          | ENTP2         | Transcript        | INTRONIC         | intron     | RP11-436021.1503 | Transcript | INTRONIC | intronic | NOV   | 3.88677e-08 5.0495e-07 | NOV   | 3.88677e-08 5.0495e-07 | NOV | 3.88677e-08 5.0495e-07 |
| 13 | r5188962   | 8 120417690 C      | T     | 0.1849 1.3e-13 0.729943 r68089342  | ENTP2         | Transcript        | INTRONIC         | intron     | RP11-436021.1504 | Transcript | INTRONIC | intronic | NOV   | 1.18715e-10 5.0495e-07 | NOV   | 1.18715e-10 5.0495e-07 | NOV | 1.18715e-10 5.0495e-07 |
| 13 | r5280831   | 8 120404319 T      | A     | 0.1839 1.9e-13 0.786269 r68089342  | RP11-77B515.2 | Transcript        | INTRONIC         | intron     | RP11-436021.1505 | Transcript | INTRONIC | intronic | NOV   | 8.92118e-10 5.0495e-07 | NOV   | 8.92118e-10 5.0495e-07 | NOV | 8.92118e-10 5.0495e-07 |
| 13 | r5188962   | 8 120404319 T      | A     | 0.1839 1.9e-13 0.786269 r68089342  | RP11-77B515.2 | Transcript        | INTRONIC         | intron     | RP11-436021.1506 | Transcript | INTRONIC | intronic | NOV   | 8.92118e-10 5.0495e-07 | NOV   | 8.92118e-10 5.0495e-07 | NOV | 8.92118e-10 5.0495e-07 |
| 13 | r5188962   | 8 120404319 T      | A     | 0.1839 1.9e-13 0.786269 r68089342  | RP11-77B515.2 | Transcript        | INTRONIC         | intron     | RP11-436021.1507 | Transcript | INTRONIC | intronic | NOV   | 8.92118e-10 5.0495e-07 | NOV   | 8.92118e-10 5.0495e-07 | NOV | 8.92118e-10 5.0495e-07 |
| 13 | r5188962   | 8 120404319 T      | A     | 0.1839 1.9e-13 0.786269 r68089342  | RP11-77B515.2 | Transcript        | INTRONIC         | intron     | RP11-436021.1508 | Transcript | INTRONIC | intronic | NOV   | 8.92118e-10 5.0495e-07 | NOV   | 8.92118e-10 5.0495e-07 | NOV | 8.92118e-10 5.0495e-07 |
| 13 | r5188962   | 8 120404319 T      | A     | 0.1839 1.9e-13 0.786269 r68089342  | RP11-77B515.2 | Transcript        | INTRONIC         | intron     | RP11-436021.1509 | Transcript | INTRONIC | intronic | NOV   | 8.92118e-10 5.0495e-07 | NOV   | 8.92118e-10 5.0495e-07 | NOV | 8.92118e-10 5.0495e-07 |
| 13 | r5188962   | 8 120404319 T      | A     | 0.1839 1.9e-13 0.786269 r68089342  | RP11-77B515.2 | Transcript        | INTRONIC         | intron     | RP11-436021.1510 | Transcript | INTRONIC | intronic | NOV   | 8.92118e-10 5.0495e-07 | NOV   | 8.92118e-10 5.0495e-07 | NOV | 8.92118e-10 5.0495e-07 |
| 13 | r5188962   | 8 120404319 T      | A     | 0.1839                             |               |                   |                  |            |                  |            |          |          |       |                        |       |                        |     |                        |

|    |                 |   |               |        |         |          |            |                 |            |               |            |                  |                 |                  |            |          |          |             |             |             |             |             |             |             |       |       |    |    |
|----|-----------------|---|---------------|--------|---------|----------|------------|-----------------|------------|---------------|------------|------------------|-----------------|------------------|------------|----------|----------|-------------|-------------|-------------|-------------|-------------|-------------|-------------|-------|-------|----|----|
| 14 | rs10503362      | 8 | 12044807      | G      | A       | 0.1839   | 1.7e-11    | 0.783269        | rs60809342 | RP11-775815.2 | Transcript | INTRONIC         | intronic        | RP11-436021.1573 | Transcript | INTRONIC | intronic | 1           | NOV         | 1.50746e-07 | 5.04956e-07 | NOV         | 1.50746e-09 | 5.04956e-07 | 14    | 2.720 | 7  | 5  |
| 14 | rs7001817       | 8 | 12054622      | G      | A       | 0.1988   | 1.4e-10    | 0.846602        | rs17191747 | ENP2          | Intergenic | DOWNSTREAM       | downstream      | RP11-436021.1574 | Transcript | INTRONIC | intronic | 1           | NOV         | 8.79151e-07 | 5.04956e-07 | NOV         | 8.79151e-07 | 5.04956e-07 | 14    | 2.637 | 7  | 5  |
| 14 | rs10503363      | 8 | 12044622      | G      | A       | 0.1839   | 1.7e-11    | 0.783269        | rs60809342 | RP11-775815.2 | Transcript | INTRONIC         | intronic        | RP11-436021.1575 | Transcript | INTRONIC | intronic | 1           | NOV         | 7.76521e-10 | 5.04956e-07 | NOV         | 7.76521e-10 | 5.04956e-07 | 14    | 2.370 | 7  | 5  |
| 14 | rs7349460       | 8 | 12034917      | C      | A       | 0.2018   | 5.7e-12    | 0.64049         | rs60809342 | ENP2          | Intergenic | INTERGENIC       | intergenic      | RP11-436021.1576 | Transcript | INTRONIC | intronic | 1           | NOV         | 9.04841e-09 | 5.04956e-07 | NOV         | 9.04841e-09 | 5.04956e-07 | 14    | 2.484 | 7  | 9  |
| 14 | rs10500357      | 8 | 12043706      | G      | T       | 0.1839   | 1.7e-11    | 0.783269        | rs60809342 | RP11-775815.2 | Transcript | INTRONIC         | intronic        | RP11-436021.1577 | Transcript | INTRONIC | intronic | 1           | NOV         | 8.92118e-10 | 5.04956e-07 | NOV         | 8.92118e-10 | 5.04956e-07 | 14    | 2.413 | 7  | 5  |
| 14 | rs7350292       | 8 | 12054622      | G      | A       | 0.1988   | 2.3e-10    | 0.858811        | rs17191747 | ENP2          | Intergenic | DOWNSTREAM       | downstream      | RP11-436021.1578 | Transcript | INTRONIC | intronic | 1           | NOV         | 2.60797e-07 | 5.04956e-07 | NOV         | 2.60797e-07 | 5.04956e-07 | 14    | 2.387 | 7  | 5  |
| 14 | rs7342860       | 8 | 12034265      | A      | C       | 0.1829   | 1.4e-11    | 0.78305         | rs60809342 | ENP2          | Transcript | INTRONIC         | intronic        | RP11-436021.1579 | Transcript | INTRONIC | intronic | 1           | NOV         | 2.79662e-08 | 5.04956e-07 | NOV         | 2.79662e-08 | 5.04956e-07 | 14    | 2.376 | 7  | 4  |
| 14 | rs1811834       | 8 | 120427603     | G      | A       | 0.2018   | 9.3e-10    | 0.809051        | rs60809342 | ENP2          | Intergenic | DOWNSTREAM       | downstream      | RP11-436021.1580 | Transcript | INTRONIC | intronic | 1           | NOV         | 1.28119e-08 | 5.04956e-07 | NOV         | 1.28119e-08 | 5.04956e-07 | 14    | 2.348 | 5  | 2  |
| 14 | rs1811835       | 8 | 120427603     | G      | A       | 0.2247   | 4.2e-12    | 0.789621        | rs60809342 | ENP2          | Transcript | INTRONIC         | intronic        | RP11-436021.1581 | Transcript | INTRONIC | intronic | 1           | NOV         | 1.60899e-07 | 5.04956e-07 | NOV         | 1.60899e-07 | 5.04956e-07 | 14    | 2.321 | 7  | 5  |
| 14 | rs17801314      | 8 | 120573729     | G      | A       | 0.1948   | 2.7e-10    | 0.858811        | rs17191747 | ENP2          | Transcript | INTRONIC         | intronic        | RP11-436021.1582 | Transcript | INTRONIC | intronic | 1           | NOV         | 2.60797e-07 | 5.04956e-07 | NOV         | 2.60797e-07 | 5.04956e-07 | 14    | 2.320 | 7  | 4  |
| 14 | rs107172213     | 8 | 120433320     | G      | A       | 0.1839   | 2.4e-11    | 0.783269        | rs60809342 | NOV           | Transcript | INTRONIC         | intronic        | RP11-436021.1583 | Transcript | INTRONIC | intronic | 1           | NOV         | 6.28574e-08 | 5.04956e-07 | NOV         | 6.28574e-08 | 5.04956e-07 | 14    | 2.318 | 6  | 4  |
| 14 | rs11780200      | 8 | 12045821      | A      | G       | 0.1839   | 1.6e-11    | 0.783269        | rs60809342 | RP11-775815.2 | Transcript | INTRONIC         | intronic        | RP11-436021.1584 | Transcript | INTRONIC | intronic | 1           | NOV         | 8.92118e-10 | 5.04956e-07 | NOV         | 8.92118e-10 | 5.04956e-07 | 14    | 2.317 | 7  | 5  |
| 14 | rs11780200      | 8 | 12045821      | A      | G       | 0.1839   | 1.6e-11    | 0.783269        | rs60809342 | RP11-775815.2 | Transcript | INTRONIC         | intronic        | RP11-436021.1585 | Transcript | INTRONIC | intronic | 1           | NOV         | 8.92118e-10 | 5.04956e-07 | NOV         | 8.92118e-10 | 5.04956e-07 | 14    | 2.317 | 7  | 5  |
| 14 | rs17317152      | 8 | 12043748      | A      | G       | 0.1839   | 1.6e-11    | 0.783269        | rs60809342 | RP11-775815.2 | Transcript | INTRONIC         | intronic        | RP11-436021.1586 | Transcript | INTRONIC | intronic | 1           | NOV         | 8.92118e-10 | 5.04956e-07 | NOV         | 8.92118e-10 | 5.04956e-07 | 14    | 2.319 | 5  | 2  |
| 14 | rs10531540      | 8 | 12043751      | G      | C       | 0.1839   | 2.1e-11    | 0.783269        | rs60809342 | RP11-775815.2 | Transcript | INTRONIC         | intronic        | RP11-436021.1587 | Transcript | INTRONIC | intronic | 1           | NOV         | 8.92118e-10 | 5.04956e-07 | NOV         | 8.92118e-10 | 5.04956e-07 | 14    | 2.051 | 5  | 4  |
| 14 | rs10575         | 8 | 12043640      | T      | C       | 0.1840   | 1.7e-11    | 0.729943        | rs60809342 | NOV           | Transcript | SPRIME_UTR       | 3_prime_UTR     | RP11-436021.1588 | Transcript | INTRONIC | intronic | 1           | NOV         | 8.92118e-10 | 5.04956e-07 | NOV         | 8.92118e-10 | 5.04956e-07 | 14    | 2.006 | 6  | 5  |
| 14 | rs118040162     | 8 | 12042329      | C      | T       | 0.1839   | 1.2e-11    | 0.783269        | rs60809342 | NOV           | Intergenic | INTERGENIC       | intergenic      | RP11-436021.1589 | Transcript | INTRONIC | intronic | 1           | NOV         | 4.45041e-11 | 5.04956e-07 | NOV         | 4.45041e-11 | 5.04956e-07 | 14    | 1.938 | 6  | 5  |
| 14 | rs1243506       | 8 | 12043928      | T      | G       | 0.2018   | 9.3e-11    | 0.809051        | rs60809342 | NOV           | Transcript | INTRONIC         | intronic        | RP11-436021.1590 | Transcript | INTRONIC | intronic | 1           | NOV         | 4.42811e-09 | 5.04956e-07 | NOV         | 4.42811e-09 | 5.04956e-07 | 14    | 1.895 | 3  | 1  |
| 14 | rs1792171       | 8 | 12044376      | C      | T       | 0.1839   | 1.6e-11    | 0.783269        | rs60809342 | RP11-775815.2 | Transcript | INTRONIC         | intronic        | RP11-436021.1591 | Transcript | INTRONIC | intronic | 1           | NOV         | 2.54886e-10 | 5.04956e-07 | NOV         | 2.54886e-10 | 5.04956e-07 | 14    | 1.892 | 7  | 5  |
| 14 | rs1791208       | 8 | 12043725      | T      | G       | 0.1839   | 1.6e-11    | 0.783269        | rs60809342 | NOV           | Transcript | INTRONIC         | intronic        | RP11-436021.1592 | Transcript | INTRONIC | intronic | 1           | NOV         | 3.00598e-10 | 5.04956e-07 | NOV         | 3.00598e-10 | 5.04956e-07 | 14    | 1.756 | 7  | 1  |
| 14 | rs6093389       | 8 | 12043702      | T      | G       | 0.2247   | 4.2e-12    | 0.789621        | rs60809342 | RP11-775815.2 | Transcript | INTRONIC         | intronic        | RP11-436021.1593 | Transcript | INTRONIC | intronic | 1           | NOV         | 1.87621e-07 | 5.04956e-07 | NOV         | 1.87621e-07 | 5.04956e-07 | 14    | 1.666 | 6  | 5  |
| 14 | rs5532847       | 8 | 12058054      | TA     | T       | 0.3174   | 2.3e-10    | 1               | rs532847   | ENP2          | Transcript | INTRONIC         | intronic        | RP11-436021.1594 | Transcript | INTRONIC | intronic | 0           | NOV         | 3.52663e-08 | 5.04956e-07 | NOV         | 3.52663e-08 | 5.04956e-07 | 14    | 1.659 | NA | 4  |
| 14 | rs67665719      | 8 | 12039596      | G      | A       | 0.2256   | 2.3e-10    | 0.75439         | rs60809342 | SNORA32       | Intergenic | UPSTREAM         | upstream        | RP11-436021.1595 | Transcript | INTRONIC | intronic | 1           | NOV         | 3.24688e-09 | 5.04956e-07 | NOV         | 3.24688e-09 | 5.04956e-07 | 14    | 1.657 | 7  | 5  |
| 14 | rs1738709       | 8 | 12043487      | A      | G       | 0.1839   | 1.7e-11    | 0.783269        | rs60809342 | RP11-775815.2 | Transcript | INTRONIC         | intronic        | RP11-436021.1596 | Transcript | INTRONIC | intronic | 1           | NOV         | 1.729e-07   | 5.04956e-07 | NOV         | 1.729e-07   | 5.04956e-07 | 14    | 1.657 | 7  | 5  |
| 14 | rs1381338       | 8 | 120458587     | T      | C       | 0.2247   | 5.3e-12    | 0.798826        | rs60809342 | RP11-775815.2 | Transcript | INTRONIC         | intronic        | RP11-436021.1597 | Transcript | INTRONIC | intronic | 1           | NOV         | 1.729e-07   | 5.04956e-07 | NOV         | 1.729e-07   | 5.04956e-07 | 14    | 1.653 | NA | 5  |
| 14 | rs68120708      | 8 | 120439009     | A      | T       | 0.2097   | 5.3e-12    | 0.78072         | rs60809342 | RP11-775815.2 | Transcript | INTRONIC         | intronic        | RP11-436021.1598 | Transcript | INTRONIC | intronic | 1           | NOV         | 1.10774e-08 | 5.04956e-07 | NOV         | 1.10774e-08 | 5.04956e-07 | 14    | 1.641 | 7  | 5  |
| 14 | rs10505287      | 8 | 120430013     | C      | G       | 0.2247   | 4.9e-12    | 0.789626        | rs60809342 | RP11-775815.2 | Transcript | INTRONIC         | intronic        | RP11-436021.1599 | Transcript | INTRONIC | intronic | 0           | NOV         | 1.65014e-07 | 5.04956e-07 | NOV         | 1.65014e-07 | 5.04956e-07 | 14    | 1.469 | 4  | 1  |
| 14 | 8:120437457_C_A | 8 | 120437457_C_A | CA     | 0.3082  | 1.1e-10  | 1          | 8:120437457_C_A | CA         | 0.3082        | 1.1e-10    | 1                | 8:120437457_C_A | CA               | 0.3082     | 1.1e-10  | 1        | NOV         | 1.10774e-08 | 5.04956e-07 | NOV         | 1.10774e-08 | 5.04956e-07 | 14          | 1.458 | NA    | 5  |    |
| 14 | rs68089342      | 8 | 120456193     | T      | A       | 0.2276   | 4.4e-11    | 1               | rs68089342 | RP11-775815.2 | Transcript | INTRONIC         | intronic        | RP11-436021.1601 | Transcript | INTRONIC | intronic | 0           | NOV         | 1.86831e-07 | 5.04956e-07 | NOV         | 1.86831e-07 | 5.04956e-07 | 14    | 1.450 | 5  | 5  |
| 14 | rs10505337      | 8 | 120456193     | T      | A       | 0.1958   | 1.2e-10    | 0.846112        | rs17191747 | ENP2          | Intergenic | DOWNSTREAM       | downstream      | RP11-436021.1602 | Transcript | INTRONIC | intronic | 0           | NOV         | 4.45041e-11 | 5.04956e-07 | NOV         | 4.45041e-11 | 5.04956e-07 | 14    | 1.382 | 7  | 4  |
| 14 | rs5731327       | 8 | 120413952     | C      | G       | 0.1839   | 1.4e-11    | 0.752521        | rs60809342 | ENP2          | Intergenic | INTERGENIC       | intergenic      | RP11-436021.1603 | Transcript | INTRONIC | intronic | 1           | NOV         | 1.02101e-10 | 5.04956e-07 | NOV         | 1.02101e-10 | 5.04956e-07 | 14    | 1.377 | 5  | 13 |
| 14 | rs60246959      | 8 | 12046959      | G      | T       | 0.1839   | 1.9e-11    | 0.783269        | rs60809342 | RP11-775815.2 | Transcript | INTRONIC         | intronic        | RP11-436021.1604 | Transcript | INTRONIC | intronic | 1           | NOV         | 8.92118e-10 | 5.04956e-07 | NOV         | 8.92118e-10 | 5.04956e-07 | 14    | 1.373 | 7  | 5  |
| 14 | rs12042728      | 8 | 12042728      | A      | G       | 0.1839   | 1.7e-11    | 0.783269        | rs60809342 | RP11-775815.2 | Transcript | INTRONIC         | intronic        | RP11-436021.1605 | Transcript | INTRONIC | intronic | 1           | NOV         | 8.92118e-10 | 5.04956e-07 | NOV         | 8.92118e-10 | 5.04956e-07 | 14    | 1.377 | 7  | 5  |
| 14 | rs12042154      | 8 | 12042154      | C      | G       | 0.2276   | 4.1e-12    | 0.755051        | rs60809342 | ENP2          | Intergenic | INTERGENIC       | intergenic      | RP11-436021.1606 | Transcript | INTRONIC | intronic | 1           | NOV         | 2.17396e-08 | 5.04956e-07 | NOV         | 2.17396e-08 | 5.04956e-07 | 14    | 1.372 | 7  | 5  |
| 14 | rs11784229      | 8 | 120573597     | A      | G       | 0.1948   | 2.7e-10    | 0.858811        | rs17191747 | ENP2          | Transcript | INTRONIC         | intronic        | RP11-436021.1607 | Transcript | INTRONIC | intronic | 1           | NOV         | 2.60797e-07 | 5.04956e-07 | NOV         | 2.60797e-07 | 5.04956e-07 | 14    | 1.337 | 5  | 4  |
| 14 | rs159966118     | 8 | 120456193     | T      | A       | 0.2008   | 8.2e-12    | 0.841983        | rs17191747 | ENP2          | Transcript | INTRONIC         | intronic        | RP11-436021.1608 | Transcript | INTRONIC | intronic | 0           | NOV         | 8.92118e-10 | 5.04956e-07 | NOV         | 8.92118e-10 | 5.04956e-07 | 14    | 1.323 | 5  | 5  |
| 14 | rs15511784      | 8 | 12044942      | A      | G       | 0.1839   | 1.8e-11    | 0.783269        | rs60809342 | RP11-775815.2 | Transcript | INTRONIC         | intronic        | RP11-436021.1609 | Transcript | INTRONIC | intronic | 1           | NOV         | 8.92118e-10 | 5.04956e-07 | NOV         | 8.92118e-10 | 5.04956e-07 | 14    | 1.317 | 7  | 5  |
| 14 | rs12042053      | C | T             | 0.1840 | 1.3e-11 | 0.729943 | rs60809342 | ENP2            | Intergenic | INTERGENIC    | intergenic | RP11-436021.1610 | Transcript      | INTRONIC         | intronic   | 1        | NOV      | 2.11531e-10 | 5.04956e-07 | NOV         | 2.11531e-10 | 5.04956e-07 | 14          | 1.177       | 7     | 5     |    |    |
| 14 | rs1461693       | 8 | 120444158     | T      | C       | 0.2117   | 3.6e-12    | 0.78195         | rs60809342 | RP11-775815.2 | Transcript | INTRONIC         | intronic        | RP11-436021.1611 | Transcript | INTRONIC | intronic | 1           | NOV         | 3.17248e-08 | 5.04956e-07 | NOV         | 3.17248e-08 | 5.04956e-07 | 14    | 1.176 | 7  | 5  |
| 14 | rs73163608      | 8 | 12056284      | G      | C       | 0.1958   | 1.0e-10    | 0.84112         | rs17191747 | ENP2          | Intergenic | INTERGENIC       | intergenic      | RP11-436021.1612 | Transcript | INTRONIC | intronic | 1           | NOV         | 5.72258e-08 | 5.04956e-07 | NOV         | 5.72258e-08 | 5.04956e-07 | 14    | 1.167 | 7  | 5  |
| 14 | rs7014927       | 8 | 120431049     | C      | A       | 0.2266   | 4.6e-12    | 0.770744        | rs60809342 | NOV           | Intergenic | INTERGENIC       | intergenic      | RP11-436021.1613 | Transcript | INTRONIC | intronic | 1           | NOV         | 2.66973e-08 | 5.04956e-07 | NOV         | 2.66973e-08 | 5.04956e-07 | 14    | 1.140 | 5  | 1  |
| 14 | rs71700778      | 8 | 12043487      | A      | G       | 0.1849   | 1.6e-11    | 0.729943        | rs60809342 | NOV           | Intergenic | INTERGENIC       | intergenic      | RP11-436021.1614 | Transcript | INTRONIC | intronic | 0           | NOV         | 8.92118e-10 | 5.04956e-07 | NOV         | 8.92118e-10 | 5.04956e-07 | 14    | 1.076 | 7  | 5  |
| 14 | rs7341847       | 8 | 12043404      | G      |         |          |            |                 |            |               |            |                  |                 |                  |            |          |          |             |             |             |             |             |             |             |       |       |    |    |





|    |             |   |             |   |         |         |          |            |                   |            |            |                           |                 |            |          |          |    |       |       |    |
|----|-------------|---|-------------|---|---------|---------|----------|------------|-------------------|------------|------------|---------------------------|-----------------|------------|----------|----------|----|-------|-------|----|
| 16 | rs1208251   | 7 | 7341531 C   | G | 0.03678 | 1.7e-11 | 0.973125 | rs12099918 | Intergenic        | INTRAGENIC | intergenic | RP11-43023.1815           | Transcript      | INTRONIC   | intronic | 0        | 16 | 0.209 | 3a    | 2  |
| 16 | rs17140990  | 7 | 73438515 C  | T | 0.05169 | 2.7e-10 | 0.692238 | rs12099918 | ELN               | Intergenic | UPSTREAM   | upstream                  | RP11-43023.1816 | Transcript | INTRONIC | intronic | 0  | 16    | 0.022 | 5  |
| 16 | rs3365312   | 7 | 73445902 C  | G | 0.05169 | 1.1e-10 | 0.692238 | rs12099918 | ELN               | Intergenic | INTRONIC   | intron                    | RP11-43023.1817 | Transcript | INTRONIC | intronic | 0  | 16    | 2.541 | Na |
| 16 | rs303195    | 7 | 73452140 A  | A | 0.05169 | 3.8e-10 | 0.692238 | rs12099918 | ELN               | Transcript | INTRONIC   | intron                    | RP11-43023.1818 | Transcript | INTRONIC | intronic | 0  | 16    | 2.540 | Na |
| 16 | rs74024     | 7 | 73447650 C  | T | 0.05169 | 1.6e-10 | 0.692238 | rs12099918 | ELN               | Transcript | INTRONIC   | intron                    | RP11-43023.1819 | Transcript | INTRONIC | intronic | 0  | 16    | 2.462 | 5  |
| 16 | rs144049583 | 7 | 73450113 TA | A | 0.05169 | 2.7e-10 | 0.692238 | rs12099918 | ELN               | Intergenic | INTRONIC   | intron                    | RP11-43023.1820 | Transcript | INTRONIC | intronic | 0  | 16    | 2.458 | Na |
| 16 | rs19229261  | 7 | 7347875 A   | T | 0.1183  | 8.9e-06 | 0.757378 | rs2855722  | ELN               | Transcript | INTRONIC   | intron                    | RP11-43023.1821 | Transcript | INTRONIC | intronic | 0  | 16    | 2.318 | 6  |
| 16 | rs120209918 | 7 | 73472600 T  | A | 0.03777 | 2.9e-12 | 1        | rs12099918 | RegulatoryFeature | REGULATORY | regulatory | RP11-43023.1822           | Transcript      | INTRONIC   | intronic | 0        | 16 | 2.081 | 2b    |    |
| 16 | rs6979609   | 7 | 73436068 C  | G | 0.05169 | 2.7e-10 | 0.692238 | rs12099918 | ELN               | Intergenic | INTRONIC   | intron                    | RP11-43023.1823 | Transcript | INTRONIC | intronic | 0  | 16    | 1.600 | 5  |
| 16 | rs873647    | 7 | 73447506 A  | A | 0.05169 | 3.6e-10 | 0.692238 | rs12099918 | ELN               | Transcript | INTRONIC   | intron                    | RP11-43023.1824 | Transcript | INTRONIC | intronic | 0  | 16    | 1.764 | Na |
| 16 | rs11807792  | 7 | 7351920 T   | G | 0.09046 | 2.5e-06 | 0.710196 | rs2855722  | Intergenic        | INTRAGENIC | intergenic | RP11-43023.1825           | Transcript      | INTRONIC   | intronic | 0        | 16 | 1.690 | 7     |    |
| 16 | rs73141161  | 7 | 73544717 T  | A | 0.09046 | 1.6e-06 | 0.710196 | rs2855722  | Intergenic        | INTRAGENIC | intergenic | RP11-43023.1826           | Transcript      | INTRONIC   | intronic | 0        | 16 | 1.657 | Na    |    |
| 16 | rs11761821  | 7 | 73438135 A  | G | 0.05169 | 2.4e-10 | 0.692238 | rs12099918 | RegulatoryFeature | REGULATORY | regulatory | RP11-43023.1827           | Transcript      | INTRONIC   | intronic | 0        | 16 | 1.597 | 5     |    |
| 16 | rs1375784   | 7 | 73440096 A  | C | 0.05169 | 2.2e-10 | 0.692238 | rs12099918 | ELN               | Intergenic | UPSTREAM   | upstream                  | RP11-43023.1828 | Transcript | INTRONIC | intronic | 0  | 16    | 1.588 | 5  |
| 16 | rs1895707   | 7 | 73470218 T  | C | 0.09145 | 1.7e-06 | 0.700181 | rs2855722  | LMK1              | Intergenic | DOWNSTREAM | downstream                | RP11-43023.1829 | Transcript | INTRONIC | intronic | 0  | 16    | 1.561 | 5a |
| 16 | rs1821878   | 7 | 73443420 A  | A | 0.05169 | 1.7e-10 | 0.692238 | rs12099918 | ELN               | Transcript | INTRONIC   | intron                    | RP11-43023.1830 | Transcript | INTRONIC | intronic | 0  | 16    | 1.500 | 5  |
| 16 | rs56017804  | 7 | 73448994 C  | T | 0.05169 | 1.4e-10 | 0.692238 | rs12099918 | ELN               | Transcript | INTRONIC   | intron                    | RP11-43023.1831 | Transcript | INTRONIC | intronic | 0  | 16    | 1.433 | 7  |
| 16 | rs6979291   | 7 | 73457027 G  | A | 0.05169 | 2.8e-10 | 0.692238 | rs12099918 | Intergenic        | INTRAGENIC | intergenic | RP11-43023.1832           | Transcript      | INTRONIC   | intronic | 0        | 16 | 1.215 | 5     |    |
| 16 | rs7609981   | 7 | 73434586 C  | T | 0.05169 | 2.4e-10 | 0.692238 | rs12099918 | Intergenic        | INTRAGENIC | intergenic | RP11-43023.1833           | Transcript      | INTRONIC   | intronic | 0        | 16 | 0.928 | 6     |    |
| 16 | rs55241353  | 7 | 73461430 GA | G | 0.05368 | 2.2e-10 | 0.629145 | rs12099918 | ELN               | Transcript | INTRONIC   | intron,feature_elongation | RP11-43023.1834 | Transcript | INTRONIC | intronic | 0  | 16    | 0.822 | Na |
| 16 | rs11183394  | 7 | 73546991 A  | G | 0.09046 | 2.6e-06 | 0.710196 | rs2855722  | Intergenic        | INTRAGENIC | intergenic | RP11-43023.1835           | Transcript      | INTRONIC   | intr     |          |    |       |       |    |

|    |                     |    |          |        |        |         |         |          |            |               |            |          |           |                  |            |          |           |   |    |       |    |     |
|----|---------------------|----|----------|--------|--------|---------|---------|----------|------------|---------------|------------|----------|-----------|------------------|------------|----------|-----------|---|----|-------|----|-----|
| 18 | rs934668            | 16 | 84938921 | C      | T      | 0.4185  | 4.1e-10 | 0.696361 | rs7161253  | CRNPLD2       | Transcript | INTRONIC | intron    | RP11-436021.1936 | Transcript | INTRONIC | intronUnc | 0 | 18 | 0.108 | NA | 4   |
| 18 | rs478390            | 16 | 84884116 | G      | A      | 0.2813  | 2.6e-09 | 0.599218 | rs1485701  | CRNPLD2       | Transcript | INTRONIC | intron    | RP11-436021.1937 | Transcript | INTRONIC | intronUnc | 0 | 18 | 0.106 | 5  | 4   |
| 18 | rs478386            | 16 | 84884201 | C      | T      | 0.3499  | 9.9e-08 | 0.656417 | rs54472123 | CRNPLD2       | Transcript | INTRONIC | intron    | RP11-436021.1938 | Transcript | INTRONIC | intronUnc | 0 | 18 | 0.087 | 20 | 4   |
| 18 | rs2426304           | 16 | 84843611 | G      | A      | 0.1789  | 7.8e-08 | 0.593722 | rs625882   | CRNPLD2       | Transcript | INTRONIC | intron    | RP11-436021.1939 | Transcript | INTRONIC | intronUnc | 0 | 18 | 0.082 | 4  | 4   |
| 18 | rs11746824          | 16 | 84925945 | A      | G      | 0.07504 | 1.8e-08 | 1        | rs11746824 | CRNPLD2       | Transcript | INTRONIC | intron    | RP11-436021.1940 | Transcript | INTRONIC | intronUnc | 0 | 18 | 0.062 | 7  | 4   |
| 18 | rs6906737           | 6  | 98343581 | A      | T      | 0.4861  | 1.5e-07 | 0.63977  | rs4842094  | RP11-436023.1 | Transcript | INTRONIC | intronUnc | RP11-436021.1941 | Transcript | INTRONIC | intronUnc | 0 | 19 | 1.96  | 6  | top |
| 18 | rs6839708           | 6  | 98361700 | C      | T      | 0.4861  | 1.4e-06 | 0.62025  | rs4842094  | RP11-436023.1 | Transcript | INTRONIC | intronUnc | RP11-436021.1942 | Transcript | INTRONIC | intronUnc | 0 | 19 | 17.75 | 5  |     |
| 18 | rs7393317           | 6  | 98390515 | A      | A      | 0.4453  | 2.3e-07 | 0.78877  | rs4842094  | RP11-436023.1 | Transcript | INTRONIC | intronUnc | RP11-436021.1943 | Transcript | INTRONIC | intronUnc | 0 | 19 | 17.27 | 5  | 7   |
| 18 | rs12180979          | 6  | 98313409 | A      | G      | 0.4871  | 8.2e-08 | 0.64274  | rs4842094  | RP11-436023.1 | Transcript | INTRONIC | intronUnc | RP11-436021.1944 | Transcript | INTRONIC | intronUnc | 0 | 19 | 15.11 | 7  | 4   |
| 18 | rs13215227          | 6  | 98502674 | C      | T      | 0.4056  | 7.4e-09 | 0.794279 | rs4842094  | RP11-436023.1 | Transcript | INTRONIC | intronUnc | RP11-436021.1945 | Transcript | INTRONIC | intronUnc | 0 | 19 | 15.08 | 3a | 7   |
| 18 | rs11394250          | 6  | 98494321 | C      | C      | 0.4404  | 1.5e-06 | 0.647878 | rs4842094  | RP11-436023.1 | Transcript | INTRONIC | intronUnc | RP11-436021.1946 | Transcript | INTRONIC | intronUnc | 0 | 19 | 14.61 | 7  | 5   |
| 18 | 6-98316220 GC_G     | 6  | 98316220 | GC     | GC     | 0.4891  | 7.8e-08 | 0.650621 | rs4842094  | RP11-436023.1 | Transcript | INTRONIC | intronUnc | RP11-436021.1947 | Transcript | INTRONIC | intronUnc | 0 | 19 | 14.02 | 6  | 4   |
| 18 | rs9187845           | 6  | 98328963 | A      | C      | 0.4891  | 7.0e-08 | 0.650621 | rs4842094  | RP11-436023.1 | Transcript | INTRONIC | intronUnc | RP11-436021.1948 | Transcript | INTRONIC | intronUnc | 0 | 19 | 11.90 | 7  | 5   |
| 18 | rs4240559           | 6  | 98437275 | C      | T      | 0.4433  | 4.7e-07 | 0.760566 | rs4842094  | RP11-436023.1 | Transcript | INTRONIC | intronUnc | RP11-436021.1949 | Transcript | INTRONIC | intronUnc | 0 | 19 | 11.16 | 7  | 5   |
| 18 | rs71757867          | 6  | 98339496 | G      | A      | 0.486   | 3.2e-08 | 0.650247 | rs4842094  | RP11-436023.1 | Transcript | INTRONIC | intronUnc | RP11-436021.1950 | Transcript | INTRONIC | intronUnc | 0 | 19 | 11.86 | 6  | 15  |
| 18 | rs7757842           | 6  | 98332930 | A      | A      | 0.4891  | 6.4e-08 | 0.650621 | rs4842094  | RP11-436023.1 | Transcript | INTRONIC | intronUnc | RP11-436021.1951 | Transcript | INTRONIC | intronUnc | 0 | 19 | 11.71 | 7  | 5   |
| 18 | rs9320747           | 6  | 98310291 | G      | T      | 0.4861  | 6.2e-08 | 0.641028 | rs4842094  | RP11-436023.1 | Transcript | INTRONIC | intronUnc | RP11-436021.1952 | Transcript | INTRONIC | intronUnc | 0 | 19 | 11.66 | 7  | 5   |
| 18 | rs9316129           | 6  | 98309379 | T      | A      | 0.4016  | 8.2e-09 | 0.78648  | rs4842094  | RP11-436023.1 | Transcript | INTRONIC | intronUnc | RP11-436021.1953 | Transcript | INTRONIC | intronUnc | 0 | 19 | 11.61 | 7  | 5   |
| 18 | rs938662            | 6  | 98489561 | C      | T      | 0.4414  | 1.6e-06 | 0.671551 | rs4842094  | RP11-436023.1 | Transcript | INTRONIC | intronUnc | RP11-436021.1954 | Transcript | INTRONIC | intronUnc | 0 | 19 | 11.59 | 5  | 1   |
| 18 | rs938929            | 6  | 98326080 | C      | G      | 0.4891  | 7.2e-08 | 0.650621 | rs4842094  | RP11-436023.1 | Transcript | INTRONIC | intronUnc | RP11-436021.1955 | Transcript | INTRONIC | intronUnc | 0 | 19 | 11.17 | 6  | 5   |
| 18 | rs6943784           | 6  | 98347395 | C      | A      | 0.486   | 2.3e-08 | 0.650247 | rs4842094  | RP11-436023.1 | Transcript | INTRONIC | intronUnc | RP11-436021.1956 | Transcript | INTRONIC | intronUnc | 0 | 19 | 10.58 | 5  | 5   |
| 18 | rs903628            | 6  | 98339377 | G      | C      | 0.4046  | 8.4e-09 | 0.7973   | rs4842094  | RP11-436023.1 | Transcript | INTRONIC | intronUnc | RP11-436021.1957 | Transcript | INTRONIC | intronUnc | 0 | 19 | 10.38 | 7  | 7   |
| 18 | rs9401250           | 6  | 98316447 | T      | C      | 0.4891  | 8.9e-08 | 0.650621 | rs4842094  | RP11-436023.1 | Transcript | INTRONIC | intronUnc | RP11-436021.1958 | Transcript | INTRONIC | intronUnc | 0 | 19 | 9.838 | 7  | 5   |
| 18 | rs12152382          | 6  | 98307633 | C      | T      | 0.4851  | 1.2e-06 | 0.673947 | rs4842094  | RP11-436023.1 | Transcript | INTRONIC | intronUnc | RP11-436021.1959 | Transcript | INTRONIC | intronUnc | 0 | 19 | 9.418 | 7  | 5   |
| 18 | rs11515975          | 6  | 98368639 | T      | A      | 0.496   | 2.3e-06 | 0.650247 | rs4842094  | RP11-436023.1 | Transcript | INTRONIC | intronUnc | RP11-436021.1960 | Transcript | INTRONIC | intronUnc | 0 | 19 | 9.081 | 6  | 5   |
| 18 | rs6569189           | 6  | 98404383 | C      | A      | 0.4453  | 2.3e-07 | 0.78877  | rs4842094  | RP11-436023.1 | Transcript | INTRONIC | intronUnc | RP11-436021.1961 | Transcript | INTRONIC | intronUnc | 0 | 19 | 8.861 | 6  | 5   |
| 18 | rs12205734          | 6  | 98321322 | T      | C      | 0.4891  | 6.7e-08 | 0.650621 | rs4842094  | RP11-436023.1 | Transcript | INTRONIC | intronUnc | RP11-436021.1962 | Transcript | INTRONIC | intronUnc | 0 | 19 | 8.801 | 7  | 5   |
| 18 | rs6934796           | 6  | 98361813 | A      | G      | 0.4861  | 1.4e-06 | 0.62025  | rs4842094  | RP11-436023.1 | Transcript | INTRONIC | intronUnc | RP11-436021.1963 | Transcript | INTRONIC | intronUnc | 0 | 19 | 8.500 | 5  | 5   |
| 18 | rs2032759           | 6  | 98331357 | G      | A      | 0.4891  | 6.2e-08 | 0.650621 | rs4842094  | RP11-436023.1 | Transcript | INTRONIC | intronUnc | RP11-436021.1964 | Transcript | INTRONIC | intronUnc | 0 | 19 | 7.676 | 7  | 5   |
| 18 | rs1933712           | 6  | 98310223 | G      | A      | 0.4871  | 6.4e-08 | 0.64274  | rs4842094  | RP11-436023.1 | Transcript | INTRONIC | intronUnc | RP11-436021.1965 | Transcript | INTRONIC | intronUnc | 0 | 19 | 7.611 | 6  | 9   |
| 18 | rs12176121          | 6  | 98529161 | T      | C      | 0.4046  | 7.9e-09 | 0.7973   | rs4842094  | RP11-436023.1 | Transcript | INTRONIC | intronUnc | RP11-436021.1966 | Transcript | INTRONIC | intronUnc | 0 | 19 | 7.115 | 6  | 9   |
| 18 | rs4112207           | 6  | 98412756 | A      | G      | 0.4443  | 1.4e-07 | 0.764693 | rs4842094  | RP11-436023.1 | Transcript | INTRONIC | intronUnc | RP11-436021.1967 | Transcript | INTRONIC | intronUnc | 0 | 19 | 7.112 | 6  | 5   |
| 18 | rs4824806           | 6  | 98349004 | A      | G      | 0.4046  | 8.5e-09 | 0.7973   | rs4842094  | RP11-436023.1 | Transcript | INTRONIC | intronUnc | RP11-436021.1968 | Transcript | INTRONIC | intronUnc | 0 | 19 | 6.807 | 7  | 9   |
| 18 | rs10877213          | 6  | 98401271 | T      | T      | 0.496   | 2.4e-06 | 0.650247 | rs4842094  | RP11-436023.1 | Transcript | INTRONIC | intronUnc | RP11-436021.1969 | Transcript | INTRONIC | intronUnc | 0 | 19 | 6.771 | 6  | 5   |
| 18 | rs11513961          | 6  | 98348905 | C      | A      | 0.496   | 3.2e-06 | 0.650247 | rs4842094  | RP11-436023.1 | Transcript | INTRONIC | intronUnc | RP11-436021.1970 | Transcript | INTRONIC | intronUnc | 0 | 19 | 6.637 | 6  | 15  |
| 18 | rs9376255           | 6  | 98509056 | G      | T      | 0.4056  | 7.2e-09 | 0.794279 | rs4842094  | RP11-436023.1 | Transcript | INTRONIC | intronUnc | RP11-436021.1971 | Transcript | INTRONIC | intronUnc | 0 | 19 | 6.262 | 7  | 14  |
| 18 | rs9387863           | 6  | 98421208 | A      | G      | 0.4433  | 1.5e-07 | 0.760566 | rs4842094  | RP11-436023.1 | Transcript | INTRONIC | intronUnc | RP11-436021.1972 | Transcript | INTRONIC | intronUnc | 0 | 19 | 5.486 | 7  | 5   |
| 18 | 6-98449775_TATA_T   | 6  | 98449775 | T      | TATA   | 0.4423  | 2.4e-06 | 0.763137 | rs4842094  | RP11-436023.1 | Transcript | INTRONIC | intronUnc | RP11-436021.1973 | Transcript | INTRONIC | intronUnc | 0 | 19 | 5.901 | NA | 5   |
| 18 | rs2972186           | 6  | 98398087 | C      | T      | 0.4056  | 7.2e-09 | 0.794279 | rs4842094  | RP11-436023.1 | Transcript | INTRONIC | intronUnc | RP11-436021.1974 | Transcript | INTRONIC | intronUnc | 0 | 19 | 5.537 | 6  | 14  |
| 18 | rs1266296           | 6  | 98321465 | A      | G      | 0.4891  | 7.0e-08 | 0.650621 | rs4842094  | RP11-436023.1 | Transcript | INTRONIC | intronUnc | RP11-436021.1975 | Transcript | INTRONIC | intronUnc | 0 | 19 | 5.486 | 7  | 5   |
| 18 | rs490350            | 6  | 98457350 | A      | G      | 0.4423  | 1.6e-06 | 0.763137 | rs4842094  | RP11-436023.1 | Transcript | INTRONIC | intronUnc | RP11-436021.1976 | Transcript | INTRONIC | intronUnc | 0 | 19 | 5.460 | 6  | 14  |
| 18 | rs7712104           | 6  | 98475100 | A      | A      | 0.4414  | 1.5e-06 | 0.671551 | rs4842094  | RP11-436023.1 | Transcript | INTRONIC | intronUnc | RP11-436021.1977 | Transcript | INTRONIC | intronUnc | 0 | 19 | 5.426 | 6  | 5   |
| 18 | rs4246316           | 6  | 98442008 | A      | C      | 0.4433  | 3.8e-07 | 0.760566 | rs4842094  | RP11-436023.1 | Transcript | INTRONIC | intronUnc | RP11-436021.1978 | Transcript | INTRONIC | intronUnc | 0 | 19 | 5.136 | 7  | 5   |
| 18 | 6-98322714_ATATAT_A | 6  | 98322714 | ATATAT | ATATAT | 0.4891  | 8.4e-08 | 0.650621 | rs4842094  | RP11-436023.1 | Transcript | INTRONIC | intronUnc | RP11-436021.1979 | Transcript | INTRONIC | intronUnc | 0 | 19 | 4.896 | NA | 5   |
| 18 | rs7761851           | 6  | 98422438 | T      | T      | 0.4453  | 1.6e-07 | 0.78877  | rs4842094  | RP11-436023.1 | Transcript | INTRONIC | intronUnc | RP11-436021.1980 | Transcript | INTRONIC | intronUnc | 0 | 19 | 4.830 | 7  | 5   |
| 18 | rs9006200           | 6  | 98401511 | A      | T      | 0.4453  | 2.1e-07 | 0.78877  | rs4842094  | RP11-436023.1 | Transcript | INTRONIC | intronUnc | RP11-436021.1981 | Transcript | INTRONIC | intronUnc | 0 | 19 | 4.829 | 3  | 5   |
| 18 | rs72793867          | 6  | 98314763 | A      | AT     | 0.4881  | 8.8e-08 | 0.646659 | rs4842094  | RP11-436023.1 | Transcript | INTRONIC | intronUnc | RP11-436021.1982 | Transcript | INTRONIC | intronUnc | 0 | 19 | 4.765 | NA | 5   |
| 18 | rs1154009           | 6  | 98398832 | T      | C      | 0.4453  | 1.6e-07 | 0.78877  | rs4842094  | RP11-436023.1 | Transcript | INTRONIC | intronUnc | RP11-436021.1983 | Transcript | INTRONIC | intronUnc | 0 | 19 | 4.765 | NA | 5   |
| 18 | rs4153843           | 6  | 98401922 | T      | C      | 0.4531  | 1.5e-07 | 0.713882 | rs4842094  | RP11-436023.1 | Transcript | INTRONIC | intronUnc | RP11-436021.1984 | Transcript | INTRONIC | intronUnc | 0 | 19 | 4.441 | 7  | 4   |
| 18 | rs4833939           | 6  | 98507832 | C      | A      | 0.4056  | 7.5e-09 | 0.794279 | rs4842094  | RP11-436023.1 | Transcript | INTRONIC | intronUnc | RP11-436021.1985 | Transcript | INTRONIC | intronUnc | 0 | 19 | 4.424 | 7  | 14  |
| 18 | rs9805999           | 6  | 98403847 | C      | T      | 0.4453  | 2.4e-07 | 0.78877  | rs4842094  | RP11-436023.1 | Transcript | INTRONIC | intronUnc | RP11-436021.1986 | Transcript | INTRONIC | intronUnc | 0 | 19 | 4.072 | 7  | 5   |
| 18 | rs4011601           | 6  | 98501713 | C      | T      | 0.4056  | 7.0e-09 | 0.794279 | rs4842094  | RP11-436023.1 | Transcript | INTRONIC | intronUnc | RP11-436021.1987 | Transcript | INTRONIC | intronUnc | 0 | 19 | 4.062 | 7  | 5   |
| 18 | rs7772327           | 6  | 98404174 | C      | T      | 0.4453  | 2.1e-07 | 0.78877  | rs4842094  | RP11-436023.1 | Transcript | INTRONIC | intronUnc | RP11-436021.1988 | Transcript | INTRONIC | intronUnc | 0 | 19 | 3.828 | 6  | 5   |
| 18 | rs4388816           | 6  | 98439152 | A      | T      | 0.4433  | 4.2e-07 | 0.760566 | rs4842094  | RP11-436023.1 | Transcript | INTRONIC | intronUnc | RP11-436021.1989 | Transcript | INTRONIC | intronUnc | 0 | 19 | 3.780 | 6  | 5   |
| 18 | rs9482277           | 6  | 98351457 | T      | C      | 0.486   | 2.2e-08 | 0.650247 | rs4842094  | RP11-436023.1 | Transcript | INTRONIC | intronUnc | RP11-436021.1990 | Transcript | INTRONIC | intronUnc | 0 | 19 | 3.750 | 6  | 5   |
| 18 | 6-98373178_ATG_A    | 6  | 98373178 | ATG    | ATG    | 0.4891  | 2.2e-06 | 0.602431 | rs4842094  | RP11-436023.1 | Transcript | INTRONIC | intronUnc | RP11-436021.1991 | Transcript |          |           |   |    |       |    |     |

|    |             |   |           |         |   |        |         |          |          |               |               |            |          |          |    |       |       |    |   |
|----|-------------|---|-----------|---------|---|--------|---------|----------|----------|---------------|---------------|------------|----------|----------|----|-------|-------|----|---|
| 19 | rs76112426  | 6 | rs532427  | G       | T | 0.4056 | 8.7e-09 | 0.793568 | rs482094 | RP11-436021.1 | Transcript    | INTRONIC   | INTRONIC | 0        | 19 | 1.256 | 6     | 15 |   |
| 19 | rs2388151   | 6 | rs361406  | G       | A | 0.496  | 2.2e-06 | 0.650247 | rs482094 | RP11-436021.1 | Transcript    | INTRONIC   | INTRONIC | 0        | 19 | 1.247 | NA    | 5  |   |
| 19 | rs65020817  | 6 | rs6348081 | T       | C | 0.496  | 2.3e-06 | 0.650247 | rs482094 | RP11-436021.1 | Transcript    | INTRONIC   | INTRONIC | 0        | 19 | 1.241 | 6     | 5  |   |
| 19 | rs7764648   | 6 | rs5827416 | C       | T | 0.3897 | 6.3e-09 | 0.751731 | rs482094 | RP11-436021.1 | Transcript    | INTRONIC   | INTRONIC | 0        | 19 | 1.181 | 7     | 9  |   |
| 19 | rs121174762 | 6 | rs5827741 | C       | C | 0.4046 | 6.0e-09 | 0.7973   | rs482094 | RP11-436021.1 | Transcript    | INTRONIC   | INTRONIC | 0        | 19 | 1.164 | 7     | 15 |   |
| 19 | rs9375068   | 6 | rs485684  | C       | T | 0.4423 | 1.6e-06 | 0.678377 | rs482094 | RP11-436021.1 | Transcript    | INTRONIC   | INTRONIC | 0        | 19 | 1.118 | 14    |    |   |
| 19 | rs9372620   | 6 | rs8330028 | A       | G | 0.4851 | 6.1e-08 | 0.650621 | rs482094 | RP11-436021.1 | Transcript    | INTRONIC   | INTRONIC | 0        | 19 | 1.103 | 6     | 5  |   |
| 19 | rs4904013   | 6 | rs3619614 | A       | G | 0.4453 | 2.0e-07 | 0.76877  | rs482094 | RP11-436021.1 | Transcript    | INTRONIC   | INTRONIC | 0        | 19 | 1.082 | 3a    | 7  |   |
| 19 | rs65252431  | 6 | rs8355221 | C       | C | 0.496  | 2.5e-06 | 0.650247 | rs482094 | RP11-436021.1 | Transcript    | INTRONIC   | INTRONIC | 0        | 19 | 1.063 | 7     | 5  |   |
| 19 | rs4849980   | 6 | rs325541  | G       | C | 0.4851 | 6.8e-08 | 0.650621 | rs482094 | RP11-436021.1 | Transcript    | INTRONIC   | INTRONIC | 0        | 19 | 1.056 | 16    | 5  |   |
| 19 | rs148758237 | 6 | rs397349  | GGTGTGT | G | C      | 0.4583  | 1.2e-07  | 0.724808 | rs482094      | RP11-436021.1 | Transcript | INTRONIC | INTRONIC | 0  | 19    | 1.031 | NA | 5 |
| 19 | rs17604608  | 6 | rs4906408 | T       | T | 0.4443 | 1.4e-07 | 0.764693 | rs482094 | RP11-436021.1 | Transcript    | INTRONIC   | INTRONIC | 0        | 19 | 1.031 | NA    | 5  |   |
| 19 | rs1338640   | 6 | rs3346803 | A       | A | 0.4851 | 6.6e-06 | 0.611967 | rs482094 | RP11-436021.1 | Transcript    | INTRONIC   | INTRONIC | 0        | 19 | 0.993 | 7     | 14 |   |
| 19 | rs601729    | 6 | rs8351187 | T       | G | 0.4861 | 1.7e-06 | 0.620225 | rs482094 | RP11-436021.1 | Transcript    | INTRONIC   | INTRONIC | 0        | 19 | 0.984 | 7     | 9  |   |
| 19 | rs651405    | 6 | rs4601808 | C       | T | 0.4453 | 2.3e-07 | 0.76877  | rs482094 | RP11-436021.1 | Transcript    | INTRONIC   | INTRONIC | 0        | 19 | 0.980 | 6     | 5  |   |
| 19 | rs1320821   | 6 | rs4623117 | C       | T | 0.4076 | 1.7e-09 | 0.673373 | rs482094 | RP11-436021.1 | Transcript    | INTRONIC   | INTRONIC | 0        | 19 | 0.917 | 7     | 14 |   |
| 19 | rs61917247  | 6 | rs4603317 | G       | C | 0.4453 | 2.1e-07 | 0.76877  | rs482094 | RP11-436021.1 | Transcript    | INTRONIC   | INTRONIC | 0        | 19 | 0.912 | 3a    | 5  |   |
| 19 | rs8177215   | 6 | rs8177265 | C       | T | 0.4026 | 1.5e-11 | 0.960226 | rs482094 | RP11-436021.1 | Transcript    | INTRONIC   | INTRONIC | 0        | 19 | 0.865 | 5     | 7  |   |
| 19 | rs201030314 | 6 | rs3236673 | C       | T | 0.4851 | 7.4e-08 | 0.650621 | rs482094 | RP11-436021.1 | Transcript    | INTRONIC   | INTRONIC | 0        | 19 | 0.860 | 6     | 5  |   |
| 19 | rs80147556  | 6 | rs5324484 | G       | A | 0.4036 | 6.2e-09 | 0.792949 | rs482094 | RP11-436021.1 | Transcript    | INTRONIC   | INTRONIC | 0        | 19 | 0.846 | 7     | 15 |   |
| 19 | rs6524808   | 6 | rs3858575 | A       | G | 0.496  | 2.4e-06 | 0.650247 | rs482094 | RP11-436021.1 | Transcript    | INTRONIC   | INTRONIC | 0        | 19 | 0.828 | 6     | 5  |   |
| 19 | rs4644073   | 6 | rs4829064 | C       | T | 0.4443 | 2.1e-07 | 0.764693 | rs482094 | RP11-436021.1 | Transcript    | INTRONIC   | INTRONIC | 0        | 19 | 0.817 | 6     | 5  |   |
| 19 | rs10872224  | 6 | rs485125  | T       | G | 0.4085 | 2.0e-09 | 0.837727 | rs482094 | RP11-436021.1 | Transcript    | INTRONIC   | INTRONIC | 0        | 19 | 0.807 | 7     | 14 |   |
| 19 | rs13216075  | 6 | rs5       |         |   |        |         |          |          |               |               |            |          |          |    |       |       |    |   |

[illegible]



|    |                      |    |          |          |            |        |         |          |            |       |            |             |                                |             |                   |            |            |       |    |    |
|----|----------------------|----|----------|----------|------------|--------|---------|----------|------------|-------|------------|-------------|--------------------------------|-------------|-------------------|------------|------------|-------|----|----|
| 22 | rs1874431            | 11 | 15083132 | G        | A          | 0.2376 | 2.0e-10 | 0.882722 | rs75091118 | CALCB | Transcript | INTRONIC    | intron                         |             |                   |            | 22         | 4.042 | 6  | 7  |
| 22 | rs10741663           |    | 15133753 | G        | A          | 0.2594 | 7.2e-10 | 0.870542 | rs75091118 |       | Intergenic | INTERGENIC  | intergenic                     |             |                   |            | 22         | 3.985 | 7  | 7  |
| 22 | rs4648224            |    | 15100701 | T        | C          | 0.2594 | 7.2e-10 | 0.870542 | rs75091118 |       | Intergenic | INTERGENIC  | intergenic                     |             |                   |            | 22         | 3.847 | 6  | 5  |
| 22 | 11:15103357_CAT_C    |    | 15103357 | C        | CAT        | 0.2594 | 1.4e-09 | 0.870542 | rs75091118 | CALCB | Transcript | SPRIME_UTR  | 3_prime_UTR,feature_truncation |             |                   |            | 22         | 3.812 | NA | 5  |
| 22 | rs12274061           |    | 15102897 | T        | C          | 0.2376 | 2.1e-10 | 0.882722 | rs75091118 |       | Transcript | INTRONIC    | intron                         |             |                   |            | 22         | 3.744 | 6  | 13 |
| 22 | rs12226508           |    | 15084344 | T        | C          | 0.2376 | 2.2e-10 | 0.882722 | rs75091118 | CALCB | Transcript | INTRONIC    | intron                         |             |                   |            | 22         | 3.636 |    |    |
| 22 | rs1023400            | 11 | 14987728 | A        | G          | 0.2913 | 3.4e-07 | 0.795576 | rs03808    | CALCB | Transcript | INTRONIC    | intron                         | CALCA       | RegulatoryFeature | REGULATORY | regulatory | 0     |    |    |
| 22 | rs7040031            | 11 | 15015501 | CTT      | C          | 0.2535 | 1.8e-10 | 0.890315 | rs75091118 | CALCB | Transcript | INTRONIC    | intron,feature_elongation      | RP11-7020.4 | Intergenic        | UPSTREAM   | upstream   | 0     |    |    |
| 22 | rs4050613            |    | 15011300 | T        | C          | 0.2475 | 1.1e-10 | 0.918217 | rs75091118 | CALCB | Transcript | INTRONIC    | intron                         | RP11-7020.4 | Intergenic        | UPSTREAM   | upstream   | 0     |    |    |
| 22 | rs41213873           |    | 15080244 | CT       | C          | 0.2326 | 1.4e-10 | 0.826914 | rs75091118 | CALCB | Transcript | INTRONIC    | intron,feature_elongation      |             |                   |            | 22         | 3.309 | NA | 13 |
| 22 | rs10430834           |    | 15105688 | A        | C          | 0.3469 | 3.4e-07 | 0.739151 | rs03808    |       | Intergenic | DOWNTSTREAM | downstream                     |             |                   |            | 22         | 3.305 | 6  | 14 |
| 22 | rs75091118           | 11 | 15045210 | CT       | C          | 0.2366 | 1.2e-11 |          |            | CALCB | Transcript | INTRONIC    | intron,feature_elongation      |             |                   |            | 22         | 3.276 | NA | 14 |
| 22 | rs1540148            | 11 | 15091140 | T        | G          | 0.2609 | 1.1e-09 | 0.876383 | rs75091118 | CALCB | Transcript | SPRIME_UTR  | 3_prime_UTR                    |             |                   |            | 22         | 3.220 | 4  | 9  |
| 22 | rs10813265           | 11 | 15104089 | A        | G          | 0.2594 | 8.1e-10 | 0.870642 | rs75091118 | CALCB | Intergenic | DOWNTSTREAM | downstream                     |             |                   |            | 22         | 3.219 | 5  | 5  |
| 22 | rs1021422            | 11 | 15087909 | C        | A          | 0.2376 | 2.1e-10 | 0.882722 | rs75091118 | CALCB | Transcript | INTRONIC    | intron                         |             |                   |            | 22         | 3.130 | 6  | 9  |
| 22 | rs4121974            | 11 | 15057907 | G        | A          | 0.2495 | 5.1e-10 | 0.918217 | rs75091118 | CALCB | Transcript | INTRONIC    | intron                         |             |                   |            | 22         | 3.081 | 5  |    |
| 22 | rs794520             | 11 | 15093381 | T        | C          | 0.2505 | 4.9e-10 | 0.903528 | rs75091118 | CALCB | Intergenic | UPSTREAM    | upstream                       |             |                   |            | 22         | 2.949 | 5  | 5  |
| 22 | rs1021428            | 11 | 15116717 | A        | G          | 0.3509 | 9.6e-07 | 0.719578 | rs03808    |       | Intergenic | INTERGENIC  | intergenic                     |             |                   |            | 22         | 2.924 | 7  | 5  |
| 22 | 11:15108645_ATTOT_A  |    | 15108645 | ATTOT    | ATTOT      | 0.2376 | 1.5e-10 | 0.882722 | rs75091118 | CALCB | Transcript | INTRONIC    | intron,feature_truncation      |             |                   |            | 22         | 2.913 | NA |    |
| 22 | 11:15119869_CCATATT1 |    | 15119869 | CCATATT1 | CCATATTTTG | 0.2634 | 6.8e-09 | 0.852884 | rs75091118 |       | Intergenic | INTERGENIC  | intergenic                     |             |                   |            | 22         | 2.815 | NA | 5  |
| 22 | rs10832347           | 11 | 15071674 | T        | C          | 0.2376 | 3.1e-10 | 0.882722 | rs75091118 | CALCB | Transcript | INTRONIC    | intron                         |             |                   |            | 22         | 2.806 | 7  | 9  |
| 22 | rs12285663           | 11 | 15061287 | T        | C          | 0.2376 | 3.0e-10 | 0.882722 | rs75091118 | CALCB | Transcript | INTRONIC    | intron                         |             |                   |            | 22         | 2.648 | 5  | 9  |
| 22 | 11:15025884_AAATG_A  |    | 15025884 | AAATG    | AAATG      | 0.2376 | 7.6e-11 | 0.882722 | rs75091118 | CALCB | Transcript | INTRONIC    | intron,feature_truncation      |             |                   |            | 22         | 2.553 | NA | 5  |
| 22 | rs12286051           | 11 | 14980848 | T        | C          |        |         |          |            |       |            |             |                                |             |                   |            |            |       |    |    |

|    |                 |    |                |       |        |         |          |           |         |                   |            |            |  |  |   |         |             |             |           |             |             |    |       |     |     |
|----|-----------------|----|----------------|-------|--------|---------|----------|-----------|---------|-------------------|------------|------------|--|--|---|---------|-------------|-------------|-----------|-------------|-------------|----|-------|-----|-----|
| 1  | 110832350       | 11 | 15082063 A     | G     | 0.2376 | 3.3e-10 | 0.582722 | r51599118 | CALCB   | Transcript        | INTRONIC   | intron     |  |  | 0 |         |             |             | 22        | 0.004       | 7           | 14 |       |     |     |
| 2  | r5687635        | 1  | 15138805 C     | T     | 0.3171 | 4.0e-09 | 0.587457 | r51481883 |         | Intergenic        | INTERGENIC | intergenic |  |  | 1 | THEM4   | 6.48806e-06 | 4.42843e-06 | S100A10   | 2.7844e-06  | 0.0017914   | 23 | 13.56 | 5   |     |
| 3  | r4688874        | 1  | 15193140 A     | G     | 0.2783 | 2.5e-10 | 0.912504 | r51854883 |         | RegulatoryFeature | REGULATORY | regulatory |  |  | 1 | THEM4   | 8.3849e-06  | 4.42843e-06 | S100A10   | 3.06265e-05 | 0.0017914   | 23 | 14.82 | 11  |     |
| 4  | r5671174        | 1  | 15193086 B     | A     | 0.2793 | 4.3e-10 | 0.879383 | r51854883 |         | Intergenic        | INTERGENIC | intergenic |  |  | 1 | THEM4   | 5.1621e-06  | 4.42843e-06 | THEM4     | 8.1621e-06  | 4.42843e-06 | 23 | 13.70 | 7   |     |
| 5  | r5687632        | 1  | 15193122 A     | A     | 0.2793 | 4.4e-10 | 0.879383 | r51854883 |         | Intergenic        | INTERGENIC | intergenic |  |  | 1 | THEM4   | 1.2785e-06  | 4.42843e-06 | THEM4     | 1.2785e-06  | 4.42843e-06 | 23 | 13.51 | 7   |     |
| 6  | r53791153       | 1  | 151958144 G    | A     | 0.2863 | 3.6e-11 | 0.999515 | r51854883 |         | Transcript        | INTRONIC   | intron     |  |  | 1 | S100A10 | 1.51883e-06 | 0.0017914   | S100A10   | 1.51883e-06 | 0.0017914   | 23 | 13.10 | N/A | top |
| 7  | r56899129       | 1  | 15196091 A     | A     | 0.2823 | 3.5e-10 | 0.864945 | r51854883 | S100A10 | Intergenic        | INTERGENIC | intergenic |  |  | 1 | THEM4   | 1.27756e-06 | 4.42843e-06 | THEM4     | 1.27756e-06 | 4.42843e-06 | 23 | 13.51 | 7   |     |
| 8  | r112770825      | 1  | 151366607 G    | A     | 0.2863 | 3.3e-11 | 1        | r51854883 |         | Transcript        | INTRONIC   | intron     |  |  | 1 | S100A10 | 3.74259e-06 | 0.0017914   | S100A10   | 3.74259e-06 | 0.0017914   | 23 | 10.29 | 20  | 1   |
| 9  | r51817720       | 1  | 151907457 G    | A     | 0.2793 | 3.3e-10 | 0.879383 | r51854883 |         | Intergenic        | INTERGENIC | intergenic |  |  | 1 | THEM4   | 1.2785e-06  | 4.42843e-06 | THEM4     | 1.2785e-06  | 4.42843e-06 | 23 | 10.27 | 7   |     |
| 10 | r5687632        | 1  | 15193122 A     | A     | 0.2793 | 4.3e-10 | 0.912504 | r51854883 |         | RegulatoryFeature | REGULATORY | regulatory |  |  | 1 | THEM4   | 1.38426e-05 | 4.42843e-06 | 0.0017914 | 23          | 10.27       | 7  |       |     |     |
| 11 | r23176815       | 1  | 151923917 C    | C     | 0.3052 | 8.8e-09 | 0.791727 | r51854883 | KRTBP28 | Intergenic        | UPSTREAM   | upstream   |  |  | 1 | THEM4   | 3.92686e-07 | 4.42843e-06 | THEM4     | 3.92686e-07 | 4.42843e-06 | 23 | 10.11 | 6   |     |
| 12 | r751402717      | 1  | 151926354 T    | TTTAA | 0.3042 | 8.8e-09 | 0.802322 | r51854883 | KRTBP28 | Intergenic        | UPSTREAM   | upstream   |  |  | 1 | THEM4   | 4.83454e-07 | 4.42843e-06 | THEM4     | 4.83454e-07 | 4.42843e-06 | 23 | 9.878 | N/A |     |
| 13 | 1151930185 ET C | 1  | 151930185 ET C | C     | 0.3072 | 7.7e-10 | 0.740102 | r51854883 |         | Intergenic        | INTERGENIC | intergenic |  |  | 0 |         |             |             |           |             |             | 23 | 9.426 | 1   |     |
| 14 | r12566232       | 1  | 151936612 G    | A     | 0.2833 | 1.5e-10 | 0.831864 | r51854883 |         | RegulatoryFeature | REGULATORY | regulatory |  |  | 0 |         |             |             |           |             |             | 23 | 9.426 | 1   |     |
| 15 | r58807484       | 1  | 151879919 T    | C     | 0.2843 | 2.7e-10 | 0.856592 | r51854883 | THEM4   | Transcript        | INTRONIC   | intron     |  |  | 1 | THEM4   | 4.42843e-06 | 4.42843e-06 | THEM4     | 4.42843e-06 | 4.42843e-06 | 23 | 9.342 | 4   |     |
| 16 | r51753163       | 1  | 151928432 C    | A     | 0.3042 | 3.5e-10 | 0.879383 | r51854883 |         | Intergenic        | INTERGENIC | intergenic |  |  | 1 | THEM4   | 7.72004e-07 | 4.42843e-06 | THEM4     | 7.72004e-07 | 4.42843e-06 | 23 | 9.342 | 4   |     |
| 17 | r72084048       | 1  | 151905083 A    | T     | 0.2793 | 4.3e-10 | 0.879383 | r51854883 |         | Intergenic        | INTERGENIC | intergenic |  |  | 1 | THEM4   | 6.16709e-06 | 4.42843e-06 | THEM4     | 6.16709e-06 | 4.42843e-06 | 23 | 9.143 | 6   |     |
| 18 | r4689124        | 1  | 151926762 T    | A     | 0.3042 | 8.2e-09 | 0.802322 | r51854883 | KRTBP28 | Intergenic        | UPSTREAM   | upstream   |  |  | 1 | THEM4   | 3.81424e    |             |           |             |             |    |       |     |     |



[illegible]













[illegible]



[illegible]

[illegible]

|    |                 |    |          |    |     |        |         |          |            |          |            |            |                           |               |                   |                |            |   |    |       |    |       |
|----|-----------------|----|----------|----|-----|--------|---------|----------|------------|----------|------------|------------|---------------------------|---------------|-------------------|----------------|------------|---|----|-------|----|-------|
| 35 | rs9916089       | 17 | 7685259  | C  | A   | 0.1899 | 4.9e-08 | 0.962175 | rs1973212  | TIMP2    | Transcript | INTRONIC   | intron                    | RP11-323N12.5 | Intergenic        | DOWNSTREAM     | downstream | 0 | 35 | 0.983 | 6  | 4     |
| 35 | rs895419        | 17 | 7686014  | G  | A   | 0.1958 | 4.1e-06 | 0.806416 | rs1973212  | RP19P29  | Intergenic | DOWNSTREAM | downstream                | USP36         | Intergenic        | UPSTREAM       | upstream   | 0 | 35 | 0.905 | 5  | 5     |
| 35 | rs6501254       | 17 | 7684253  | A  | A   | 0.1948 | 1.0e-06 | 0.812032 | rs1973212  | TIMP3    | Intergenic | DOWNSTREAM | downstream                | USP36         | Intergenic        | UPSTREAM       | upstream   | 0 | 35 | 0.068 | 5  | 5     |
| 36 | rs740722        | 11 | 7004096  | A  | G   | 0.1252 | 9.2e-07 | 0.760705 | rs781659   | AN01-AS1 | Transcript | INTRONIC   | intron,nc                 | AN01          | CodingTranscript  | NON_SYNONYMOUS | missense   | 0 | 36 | 22.9  | NA | 4 top |
| 36 | rs710595        | 11 | 7000331  | A  | C   | 0.4851 | 4.3e-09 | 1        | rs875107   | AN01     | Transcript | INTRONIC   | intron                    | AN01          | RegulatoryFeature | REGULATORY     | regulatory | 0 | 36 | 2.541 | 2b | 2 top |
| 36 | 11-7001192 CA_C | 11 | 7001192  | C  | C   | 0.1352 | 4.9e-08 | 1        | rs781659   | AN01     | Transcript | INTRONIC   | intron,feature_truncation | AN01          | Intergenic        | DOWNSTREAM     | downstream | 0 | 36 | 1.015 | NA | 4     |
| 36 | rs5917526       | 11 | 7000218  | AT | A   | 0.2005 | 3.1e-06 | 0.668962 | rs875107   | AN01     | Transcript | INTRONIC   | intron,feature_truncation | AN01          | Intergenic        | DOWNSTREAM     | downstream | 0 | 36 | 6.234 | NA | 2     |
| 36 | rs272609        | 11 | 70007562 | A  | C   | 0.1352 | 4.2e-08 | 1        | rs781659   | AN01     | Transcript | INTRONIC   | intron                    | AN01-AS1      | Intergenic        | UPSTREAM       | upstream   | 0 | 36 | 6.204 | 5  | 4     |
| 36 | rs17131347      | 11 | 7004854  | T  | C   | 0.1252 | 1.9e-07 | 0.760705 | rs781659   | AN01     | Transcript | INTRONIC   | intron                    | AN01-AS1      | Intergenic        | UPSTREAM       | upstream   | 0 | 36 | 6.181 | NA | 4     |
| 36 | rs14212765      | 11 | 7000711  | A  | C   | 0.1352 | 3.9e-08 | 1        | rs781659   | AN01     | Transcript | INTRONIC   | intron                    | AN01-AS1      | Intergenic        | UPSTREAM       | upstream   | 0 | 36 | 5.652 | 5  | 2     |
| 36 | rs15400958      | 11 | 7000184  | T  | CT  | 0.2783 | 2.4e-08 | 0.734076 | rs34094842 | AN01     | Transcript | INTRONIC   | intron,feature_truncation | AN01          | Intergenic        | DOWNSTREAM     | downstream | 0 | 36 | 3.396 | NA | 2     |
| 36 | rs1720811       | 11 | 6998206  | T  | C   | 0.1431 | 1.7e-07 | 0.812032 | rs781659   | AN01     | Transcript | INTRONIC   | intron                    | RP11-805U14.3 | Transcript        | INTRONIC       | intron,nc  | 0 | 36 | 1.747 | 3b | 5     |
| 36 | 11-7001509 C_C  | 11 | 7001509  | C  | CTA | 0.1272 | 1.4e-06 | 0.778339 | rs781659   | AN01     | Transcript | INTRONIC   | intron,feature_truncation | AN01          | Intergenic        | DOWNSTREAM     | downstream | 0 | 36 | 4.956 | NA | 4     |
| 36 | rs875107        | 11 | 70005174 | A  | C   | 0.4851 | 3.7e-09 | 1        | rs875107   | AN01     | Transcript | INTRONIC   | intron                    | AN01          | RegulatoryFeature | REGULATORY     | regulatory | 0 | 36 | 4.675 | NA | 4     |
| 36 | rs15531507      | 11 | 7001824  | T  | C   | 0.1252 | 9.4e-07 | 0.760705 | rs781659   | AN01     | Transcript | INTRONIC   | intron                    | AN01-AS1      | Intergenic        | DOWNSTREAM     | downstream | 0 | 36 | 4.049 | 4  | 4     |
| 36 | rs17444388      | 11 | 7001720  | A  | T   | 0.1262 | 1.2e-06 | 0.752088 | rs781659   | AN01     | Transcript | INTRONIC   | intron                    | AN01-AS1      | Intergenic        | UPSTREAM       | upstream   | 0 | 36 | 3.748 | 3b | 5     |
| 36 | rs1781658       | 11 | 7000287  | A  | G   | 0.4145 | 1.5e-06 | 0.677001 | rs875107   | AN01     | Transcript | INTRONIC   | intron                    | AN01          | RegulatoryFeature | REGULATORY     | regulatory | 0 | 36 | 3.609 | NA | 4     |
| 36 | rs175108        | 11 | 7000641  | A  | C   | 0.4851 | 1.2e-09 | 1        | rs875107   | AN01     | Transcript | INTRONIC   | intron                    | AN01          | RegulatoryFeature | REGULATORY     | regulatory | 0 | 36 | 3.378 | NA | 2     |
| 36 | rs55714726      | 11 | 7002431  | T  | C   | 0.1262 | 1.9e-06 | 0.768838 | rs781659   | AN01     | Transcript | INTRONIC   | intron                    | AN01          | RegulatoryFeature | REGULATORY     | regulatory | 0 | 36 | 3.314 | 4  | 1     |
| 36 | rs12806297      | 11 | 7000117  | T  | C   | 0.1352 | 5.1e-08 | 1        | rs781659   | AN01     | Transcript | INTRONIC   | intron                    | AN01          | RegulatoryFeature | REGULATORY     | regulatory | 0 | 36 | 3.091 | 5  | 4     |
| 36 | rs12420027      | 11 | 7001889  | A  | G   | 0.1272 | 1.1e-06 | 0.778339 | rs781659   | AN01     | Transcript | INTRONIC   | in                        |               |                   |                |            |   |    |       |    |       |

[illegible]

|    |                 |   |                 |    |    |        |         |          |          |          |            |          |        |              |                    |            |            |   |       |   |   |
|----|-----------------|---|-----------------|----|----|--------|---------|----------|----------|----------|------------|----------|--------|--------------|--------------------|------------|------------|---|-------|---|---|
| 40 | rs4303974       | 4 | rs157598A       | A  | C  | 0.2744 | 1.6e-08 | 0.98975  | rs432788 | CLOUTNF7 | Transcript | INTRONIC | intron | RP11-48402.1 | Transcript         | INTRONIC   | intronic   | 0 | 4.871 | 7 | 1 |
| 40 | rs3564937       | 4 | rs1549877A      | G  | A  | 0.2724 | 1.3e-08 | 0.93937  | rs432788 | CLOUTNF7 | Transcript | INTRONIC | intron | RP11-46564.1 | Transcript         | INTRONIC   | intronic   | 0 | 4.810 | 7 | 5 |
| 40 | rs432788        | 4 | rs1536357       | A  | C  | 0.2763 | 1.3e-08 | 0.94027  | rs432788 | CLOUTNF7 | Transcript | INTRONIC | intron | RP11-48402.1 | Transcript         | INTRONIC   | intronic   | 0 | 4.810 | 7 | 5 |
| 40 | rs1312790       | 4 | rs1556795 G     | A  | A  | 0.2744 | 9.6e-08 | 0.94847  | rs432788 | CLOUTNF7 | Transcript | INTRONIC | intron | RP11-48402.1 | Intergenic         | DOWNSTREAM | downstream | 0 | 4.582 | 5 | 5 |
| 40 | rs4420978       | 4 | rs157828A       | G  | G  | 0.3628 | 1.4e-06 | 0.65216  | rs432788 | CLOUTNF7 | Transcript | INTRONIC | intron | RP11-48402.1 | Transcript         | INTRONIC   | intronic   | 0 | 4.453 | 7 | 5 |
| 40 | rs6403237       | 4 | rs1557017 G     | G  | G  | 0.3618 | 1.7e-06 | 0.658287 | rs432788 | CLOUTNF7 | Transcript | INTRONIC | intron | RP11-48402.1 | Intergenic         | DOWNSTREAM | downstream | 0 | 4.272 | 5 | 5 |
| 40 | rs999460        | 4 | rs1574135 C     | T  | T  | 0.2753 | 2.2e-08 | 0.946427 | rs432788 | CLOUTNF7 | Transcript | INTRONIC | intron | RP11-48402.1 | Transcript         | INTRONIC   | intronic   | 0 | 4.266 | 7 | 5 |
| 40 | rs4623443       | 4 | rs1585866 T     | C  | C  | 0.3628 | 1.4e-06 | 0.65216  | rs432788 | CLOUTNF7 | Transcript | INTRONIC | intron | RP11-48402.1 | Transcript         | INTRONIC   | intronic   | 0 | 4.193 | 5 | 5 |
| 40 | rs15384029 CA_C | 4 | rs15384029 CA_C | CA | CA | 0.3648 | 1.1e-06 | 0.652163 | rs432788 | CLOUTNF7 | Transcript | INTRONIC | intron | RP11-48402.1 | Transcript         | INTRONIC   | intronic   | 0 | 4.193 | 5 | 5 |
| 40 | rs4320053       | 4 | rs1570073 G     | C  | C  | 0.2744 | 1.5e-08 | 0.979493 | rs432788 | CLOUTNF7 | Transcript | INTRONIC | intron | RP11-46564.1 | Regulatory/feature | REGULATORY | regulatory | 0 | 3.994 | 5 | 5 |
| 40 | rs4641135       | 4 | rs1591784 G     | A  | A  | 0.3648 | 3.6e-06 | 0.646331 | rs432788 | CLOUTNF7 | Transcript | INTRONIC | intron | RP11-48402.1 | Transcript         | INTRONIC   | intronic   | 0 | 3.852 | 7 | 5 |
| 40 | rs10030738      | 4 | rs155496A       | G  | G  | 0.3608 | 3.0e-06 | 0.614778 | rs432788 | CLOUTNF7 | Transcript | INTRONIC | intron | RP11-48402.1 | Intergenic         | DOWNSTREAM | downstream | 0 | 3.841 | 5 | 5 |
| 40 | rs4467406       | 4 | rs1558915 A     | G  | G  | 0.3618 | 1.7e-06 | 0.658287 | rs432788 | CLOUTNF7 | Transcript | INTRONIC | intron | RP11-48402.1 | Transcript         | INTRONIC   | intronic   | 0 | 3.809 | 7 | 5 |
| 40 | rs4698878       | 4 | rs1588800 G     | C  | C  | 0.3638 | 3.6e-06 | 0.649239 | rs432788 | CLOUTNF7 | Transcript | INTRONIC | intron | RP11-48402.1 | Transcript         | INTRONIC   | intronic   | 0 | 3.466 | 5 | 5 |
| 40 | rs4698973       | 4 | rs1568962 G     | C  | C  | 0.3618 | 2.3e-06 | 0.617737 | rs432788 | CLOUTNF7 | Transcript | INTRONIC | intron | RP11-48402.1 | Transcript         | INTRONIC   | intronic   | 0 | 3.446 | 7 | 5 |
| 40 | rs4645128       | 4 | rs1570127 G     | G  | G  | 0.3598 | 1.7e-06 | 0.651388 | rs432788 | CLOUTNF7 | Transcript | INTRONIC | intron | RP11-48402.1 | Transcript         | INTRONIC   | intronic   | 0 | 3.404 | 7 | 5 |
| 40 | rs4346643       | 4 | rs1572744 C     | T  | T  | 0.3618 | 2.3e-06 | 0.617737 | rs432788 | CLOUTNF7 | Transcript | INTRONIC | intron | RP11-48402.1 | Transcript         | INTRONIC   | intronic   | 0 | 3.276 | 7 | 5 |
| 40 | rs13861047      | 4 | rs1593835 A     | G  | G  | 0.3628 | 1.3e-06 | 0.642594 | rs432788 | CLOUTNF7 | Transcript | INTRONIC | intron | RP11-48402.1 | Transcript         | INTRONIC   | intronic   | 0 | 3.074 | 4 | 5 |
| 40 | rs6852633       | 4 | rs1554453 C     | T  | T  | 0.3618 | 1.7e-06 | 0.658287 | rs432788 | CLOUTNF7 | Transcript | INTRONIC | intron | RP11-46564.1 | Transcript         | INTRONIC   | intronic   | 0 | 2.987 | 5 | 2 |
| 40 | rs13139185      | 4 | rs1582335 A     | G  | G  | 0.3638 | 3.6e-06 | 0.649239 | rs432788 | CLOUTNF7 | Transcript | INTRONIC | intron | RP11-48402.1 | Transcript         | INTRONIC   | intronic   | 0 | 2.941 | 7 | 5 |
| 40 | rs4698972       | 4 | rs1568972 A     | G  | G  | 0.3579 | 5.4e-06 | 0.615771 | rs432788 | CLOUTNF7 |            |          |        |              |                    |            |            |   |       |   |   |









[illegible]



|    |            |       |           |           |   |        |         |          |            |           |            |            |          |                           |   |  |  |                   |            |            |          |
|----|------------|-------|-----------|-----------|---|--------|---------|----------|------------|-----------|------------|------------|----------|---------------------------|---|--|--|-------------------|------------|------------|----------|
| 50 | rs10924249 | 1     | 24570642  | T         | G | 0.2117 | 1.0e-06 | 0.830572 | rs12041565 | KIF26B    | Transcript | INTRONIC   | intron   | 0                         |   |  |  | 50                | 3.170      | 5          | 1        |
| 51 | rs12549788 | 8     | 11653907  | A         | G | 0.4394 | 4.9e-07 | 0.862341 | rs2049865  | TP53      | Transcript | INTRONIC   | intron   | 0                         |   |  |  | 51                | 20.4       | 4          | 5        |
| 51 | rs10576621 | 8     | 11657662  | T         | C | 0.4225 | 1.3e-06 | 0.938423 | rs2049865  | TP53      | Transcript | INTRONIC   | intron   | 0                         |   |  |  | 51                | 25.65      | 5          | 1        |
| 51 | rs3808428  | 8     | 11651979  | G         | C | 0.4394 | 3.6e-07 | 0.855319 | rs2049865  | TP53      | Transcript | INTRONIC   | intron   | 0                         |   |  |  | AF178030.2        | Intergenic | UPSTREAM   | upstream |
| 51 | rs1569364  | 8     | 11662974  | T         | C | 0.4254 | 7.4e-07 | 0.797031 | rs2049865  | TP53      | Transcript | INTRONIC   | intron   | 0                         |   |  |  | 51                | 16.42      | 4          | 1        |
| 51 | rs3205424  | 8     | 11655442  | G         | A | 0.4324 | 1.3e-06 | 0.894906 | rs2049865  | TP53      | Transcript | INTRONIC   | intron   | 0                         |   |  |  | 51                | 14.18      | 7          | 1        |
| 51 | rs800878   | 8     | 11648149  | C         | G | 0.4394 | 6.2e-06 | 0.817199 | rs2049865  | TP53      | Transcript | INTRONIC   | intron   | 0                         |   |  |  | 51                | 13.94      | 5          | 5        |
| 51 | rs1963767  | 8     | 11658380  | A         | G | 0.4225 | 1.6e-06 | 0.938423 | rs2049865  | TP53      | Transcript | INTRONIC   | intron   | 0                         |   |  |  | 51                | 13.73      | 7          | 5        |
| 51 | rs3265036  | 8     | 11656037  | G         | A | 0.4324 | 1.3e-06 | 0.894906 | rs2049865  | TP53      | Transcript | INTRONIC   | intron   | 0                         |   |  |  | 51                | 13.38      | 5          | 1        |
| 51 | rs3808459  | 8     | 11659190  | C         | T | 0.4215 | 1.6e-06 | 0.942214 | rs2049865  | TP53      | Transcript | INTRONIC   | intron   | 0                         |   |  |  | 51                | 12.43      | 7          | 5        |
| 51 | rs1028274  | 8     | 11658351  | G         | T | 0.4225 | 1.9e-06 | 0.938423 | rs2049865  | TP53      | Transcript | INTRONIC   | intron   | 0                         |   |  |  | 51                | 12.01      | 7          | 5        |
| 51 | rs2393897  | 8     | 11659199  | G         | T | 0.4365 | 2.6e-07 | 0.932226 | rs2049865  | TP53      | Transcript | INTRONIC   | intron   | 0                         |   |  |  | 51                | 11.47      | 20         | 1        |
| 51 | rs2717216  | 8     | 11663007  | T         | A | 0.4225 | 6.4e-07 | 0.805189 | rs2049865  | TP53      | Transcript | INTRONIC   | intron   | 0                         |   |  |  | 51                | 11.34      | 4          | 1        |
| 51 | rs1180624  | 8     | 11647811  | C         | T | 0.4604 | 4.2e-06 | 0.815252 | rs2049865  | TP53      | Transcript | INTRONIC   | intron   | 0                         |   |  |  | RegulatoryFeature | REGULATORY | regulatory | 0        |
| 51 | rs97906    | 8     | 11661931  | T         | C | 0.4314 | 1.2e-06 | 0.863193 | rs2049865  | TP53      | Transcript | INTRONIC   | intron   | 0                         |   |  |  | RegulatoryFeature | REGULATORY | regulatory | 0        |
| 51 | rs2409844  | 8     | 11648834  | A         | C | 0.4205 | 1.3e-06 | 0.946022 | rs2049865  | TP53      | Transcript | INTRONIC   | intron   | 0                         |   |  |  | RegulatoryFeature | REGULATORY | regulatory | 0        |
| 51 | rs12114740 | 8     | 116481700 | C         | T | 0.4394 | 6.1e-06 | 0.817199 | rs2049865  | TP53      | Transcript | INTRONIC   | intron   | 0                         |   |  |  | RegulatoryFeature | REGULATORY | regulatory | 0        |
| 51 | rs1481582  | 8     | 116480713 | A         | G | 0.4394 | 6.1e-06 | 0.817199 | rs2049865  | TP53      | Transcript | INTRONIC   | intron   | 0                         |   |  |  | RegulatoryFeature | REGULATORY | regulatory | 0        |
| 51 | rs3028461  | 8     | 116597716 | T         | C | 0.4395 | 1.2e-07 | 0.934021 | rs2049865  | TP53      | Transcript | INTRONIC   | intron   | 0                         |   |  |  | 51                | 9.08       | 7          | 2        |
| 51 | rs11659497 | TA, T | 8         | 116595497 | T | TA     | 0.4205  | 1.1e-06  | 0.930388   | rs2049865 | TP53       | Transcript | INTRONIC | intron,feature_truncation | 0 |  |  | 51                | 8.86       | 6          | 5        |
| 51 | rs1384810  | 8     | 116486106 | T         | C | 0.4394 | 5.7e-06 | 0.817199 | rs2049865  | TP53      | Transcript | INTRONIC   | intron   | 0                         |   |  |  | 51                | 8.85       | NA         | 2        |
| 51 | rs3808449  | 8     | 116576978 | A         | G | 0.4225 | 1.6e-06 | 0.938423 | rs2049865  | TP53      | Transcript | INTRONIC   | intron   | 0                         |   |  |  | 51                | 8.316      | NA         | 5        |
| 51 | rs800910   | 8     | 116496984 | A         | T | 0.4384 | 2.0e-07 | 0.858827 | rs2049865  | TP53      | Transcript | INTRONIC   | intron   |                           |   |  |  |                   |            |            |          |

|    |                  |   |           |    |    |        |         |          |          |       |            |          |                           |            |            |                   |            |            |   |    |       |       |   |   |
|----|------------------|---|-----------|----|----|--------|---------|----------|----------|-------|------------|----------|---------------------------|------------|------------|-------------------|------------|------------|---|----|-------|-------|---|---|
| 51 | rs1079822        | 8 | 116525324 | T  | C  | 0.4394 | 3.9e-07 | 0.855319 | r2049865 | TRPS1 | Transcript | INTRONIC | intron                    | AF178030.2 | Intergenic | DOWNSTREAM        | downstream | 0          |   | 51 | 1.359 | NA    | 4 |   |
| 51 | rs2721954        | 8 | 116405103 | T  | C  | 0.4175 | 2.8e-07 | 0.917766 | r2049865 | TRPS1 | Transcript | INTRONIC | intron                    |            |            |                   |            | 0          |   | 51 | 1.320 | 7     | 4 |   |
| 51 | rs1380648        | 8 | 116471025 | T  | G  | 0.4404 | 5.5e-06 | 0.815252 | r2049865 | TRPS1 | Transcript | INTRONIC | intron                    |            |            |                   |            | 0          |   | 51 | 1.318 | NA    | 5 |   |
| 51 | rs2358019        | 8 | 116565968 | G  | C  | 0.4215 | 1.1e-06 | 0.942214 | r2049865 | TRPS1 | Transcript | INTRONIC | intron                    |            |            |                   |            | 0          |   | 51 | 1.318 | 6     | 4 |   |
| 51 | rs1178504        | 8 | 116591288 | G  | A  | 0.4215 | 1.6e-06 | 0.942214 | r2049865 | TRPS1 | Transcript | INTRONIC | intron                    |            |            |                   |            | 0          |   | 51 | 1.309 | 5     | 5 |   |
| 51 | rs12056626       | 8 | 116557955 | G  | C  | 0.4344 | 2.4e-06 | 0.887707 | r2049865 | TRPS1 | Transcript | INTRONIC | intron                    |            |            |                   |            | 0          |   | 51 | 1.291 | 6     | 5 |   |
| 51 | 8:116592145_GA_G | 8 | 116592145 | G  | GA | 0.4215 | 1.5e-06 | 0.942214 | r2049865 | TRPS1 | Transcript | INTRONIC | intron,feature_truncation |            |            |                   |            | 0          |   | 51 | 1.287 | NA    | 5 |   |
| 51 | rs2178947        | 8 | 116537530 | C  | A  | 0.4374 | 5.4e-07 | 0.861783 | r2049865 | TRPS1 | Transcript | INTRONIC | intron                    |            |            |                   |            | 0          |   | 51 | 1.234 | 8     | 5 |   |
| 51 | rs800381         | 8 | 116506134 | T  | G  | 0.4374 | 2.8e-07 | 0.854215 | r2049865 | TRPS1 | Transcript | INTRONIC | intron                    |            |            |                   |            | 0          |   | 51 | 1.241 | NA    | 2 |   |
| 51 | rs10505258       | 8 | 116602855 | C  | T  | 0.4145 | 2.8e-07 | 0.906179 | r2049865 | TRPS1 | Transcript | INTRONIC | intron                    |            |            |                   |            | 0          |   | 51 | 1.188 | 5     | 4 |   |
| 51 | rs2178946        | 8 | 116537058 | A  | G  | 0.4384 | 4.9e-07 | 0.858258 | r2049865 | TRPS1 | Transcript | INTRONIC | intron                    |            |            |                   |            | 0          |   | 51 | 1.184 | 6     | 5 |   |
| 51 | rs11602499       | 8 | 116602795 | C  | T  | 0.4175 | 2.7e-07 | 0.917766 | r2049865 | TRPS1 | Transcript | INTRONIC | intron                    |            |            |                   |            | 0          |   | 51 | 1.183 | 5     | 4 |   |
| 51 | rs1483589        | 8 | 116564796 | G  | A  | 0.4215 | 1.2e-06 | 0.942214 | r2049865 | TRPS1 | Transcript | INTRONIC | intron                    |            |            |                   |            | 0          |   | 51 | 1.167 | 5     | 4 |   |
| 51 | rs800369         | 8 | 116480905 | C  | T  | 0.4404 | 6.4e-06 | 0.82282  | r2049865 | TRPS1 | Transcript | INTRONIC | intron                    |            |            |                   |            | 0          |   | 51 | 1.160 | NA    | 5 |   |
| 51 | rs2625674        | 8 | 11649221  | A  | G  | 0.4374 | 1.6e-07 | 0.814808 | r2049865 | TRPS1 | Transcript | INTRONIC | intron                    |            |            |                   |            | 0          |   | 51 | 1.150 | NA    | 5 |   |
| 51 | rs6991253        | 8 | 116593107 | C  | T  | 0.4195 | 1.5e-06 | 0.93384  | r2049865 | TRPS1 | Transcript | INTRONIC | intron                    |            |            |                   |            | 0          |   | 51 | 1.056 | 7     | 5 |   |
| 51 | rs35864552       | 8 | 116499483 | GA | G  | 0.4294 | 1.1e-06 | 0.783911 | r2049865 | TRPS1 | Transcript | INTRONIC | intron,feature_elongation |            |            |                   |            | 0          |   | 51 | 1.052 | NA    | 4 |   |
| 51 | rs2737305        | 8 | 116610180 | C  | T  | 0.4205 | 1.6e-06 | 0.824609 | r2049865 | TRPS1 | Transcript | INTRONIC | intron                    |            |            |                   |            | 0          |   | 51 | 0.937 | 6     | 4 |   |
| 51 | rs800880         | 8 | 116508132 | C  | T  | 0.4404 | 5.1e-07 | 0.852425 | r2049865 | TRPS1 | Transcript | INTRONIC | intron                    |            |            |                   |            | 0          |   | 51 | 0.935 | NA    | 5 |   |
| 51 | rs7823575        | 8 | 116551546 | G  | A  | 0.4384 | 4.9e-07 | 0.865856 | r2049865 | TRPS1 | Transcript | INTRONIC | intron                    |            |            |                   |            | 0          |   | 51 | 0.917 | 5     | 4 |   |
| 51 | rs1905176        | 8 | 116537058 | G  | A  | 0.4374 | 5.5e-07 | 0.861783 | r2049865 | TRPS1 | Transcript | INTRONIC | intron                    |            |            |                   |            | 0          |   | 51 | 0.827 | NA    | 4 |   |
| 51 | 8:116499624_AC_A | 8 | 116499624 | A  | AC | 0.4384 | 2.3e-07 | 0.858827 | r2049865 | TRPS1 | Transcript | INTRONIC | intron,feature_truncation |            |            |                   |            | 0          |   | 51 | 0.741 | NA    | 4 |   |
| 51 | rs2049867        | 8 | 116588570 | C  | T  | 0.4205 | 1.2e-06 | 0.946032 | r2049865 | TRPS1 | Transcript | INTRONIC | intron                    |            |            |                   |            | 0          |   | 51 | 0.734 | 3a    | 1 |   |
| 51 | rs2737312        | 8 | 116621214 | T  | C  | 0.4334 | 1.5e-06 | 0.855032 | r2049865 | TRPS1 | Transcript | INTRONIC | intron                    |            |            | RegulatoryFeature | REGULATORY | regulatory | 0 |    | 51    | 0.690 | 7 | 5 |
| 51 | rs809623         | 8 | 116499185 | A  | G  | 0.4394 | 2.9e-07 | 0.855319 | r2049865 | TRPS1 | Transcript | INTRONIC | intron                    |            |            |                   |            | 0          |   | 51 | 0.665 | NA    | 4 |   |
| 51 | rs808418         | 8 | 116491594 | G  | T  | 0.4374 | 2.0e-07 | 0.854808 | r2049865 | TRPS1 | Transcript | INTRONIC | intron                    |            |            |                   |            | 0          |   | 51 | 0.616 | 3a    | 1 |   |
| 51 | rs2625675        | 8 | 116499086 | T  | A  | 0.4384 | 2.2e-07 | 0.858827 | r2049865 | TRPS1 | Transcript | INTRONIC | intron                    |            |            |                   |            | 0          |   | 51 | 0.616 | 7     | 4 |   |
| 51 | rs4326410        | 8 | 116593582 | T  | C  | 0.4185 | 1.2e-06 | 0.937673 | r2049865 | TRPS1 | Transcript | INTRONIC | intron                    |            |            |                   |            | 0          |   | 51 | 0.588 | 7     | 5 |   |
| 51 | rs9643105        | 8 | 116542967 | C  | T  | 0.4384 | 3.1e-07 | 0.865856 | r2049865 | TRPS1 | Transcript | INTRONIC | intron                    |            |            |                   |            | 0          |   | 51 | 0.585 | 7     | 4 |   |
| 51 | rs11267515       | 8 | 116602676 | A  | G  | 0.4185 | 2.7e-07 | 0.912089 | r2049865 | TRPS1 | Transcript | INTRONIC | intron                    |            |            |                   |            | 0          |   | 51 | 0.572 | 4     | 4 |   |
| 51 | rs1180647        | 8 | 116472478 | T  | C  | 0.4404 | 5.5e-06 | 0.815252 | r2049865 | TRPS1 | Transcript | INTRONIC | intron                    |            |            |                   |            | 0          |   | 51 | 0.460 | 7     | 5 |   |
| 51 | rs800887         | 8 | 116460882 | G  | A  | 0.4404 | 4.4e-06 | 0.815252 | r2049865 | TRPS1 | Transcript | INTRONIC | intron                    |            |            |                   |            | 0          |   | 51 | 0.457 | NA    | 5 |   |
| 51 | rs2625676        | 8 | 114951133 | C  | T  | 0.4374 | 1.9e-07 | 0.814808 | r2049865 | TRPS1 | Transcript | INTRONIC | intron                    |            |            |                   |            | 0          |   | 51 | 0.412 | NA    | 5 |   |
| 51 | rs1160133        | 8 | 116480724 | G  | T  | 0.4215 | 1.2e-06 | 0.942214 | r2049865 | TRPS1 | Transcript | INTRONIC | intron                    |            |            |                   |            | 0          |   | 51 | 0.407 | 6     | 5 |   |
| 51 | rs803220         | 8 | 116505452 | A  | G  | 0.4215 | 1.1e-06 | 0.942214 | r2049865 | TRPS1 | Transcript | INTRONIC | intron                    |            |            |                   |            | 0          |   | 51 | 0.388 | 6     | 4 |   |
| 51 | rs2721933        | 8 | 116827175 | C  | T  | 0.4245 | 8.2e-07 | 0.86584  | r2049865 | TRPS1 | Transcript | INTRONIC | intron                    |            |            |                   |            | 0          |   | 51 | 0.359 | 2b    | 2 |   |
| 51 | rs1531144        | 8 | 116564879 | C  | A  | 0.4225 | 1.0e-06 | 0.938423 | r2049865 | TRPS1 | Transcript | INTRONIC | intron                    |            |            |                   |            | 0          |   | 51 | 0.230 | 6     | 4 |   |
| 51 | rs824200         | 8 | 116531797 | A  | G  | 0.4384 | 5.4e-07 | 0.858258 | r2049865 | TRPS1 | Transcript | INTRONIC | intron                    |            |            |                   |            | 0          |   | 51 | 0.213 | 6     | 5 |   |
| 51 | rs12148221       | 8 | 116512403 | T  | C  | 0.4394 | 5.4e-07 | 0.855319 | r2049865 | TRPS1 | Transcript | INTRONIC | intron                    |            |            |                   |            | 0          |   | 51 | 0.171 | 7     | 5 |   |
| 51 | rs13360941       | 8 | 116535753 | C  | T  | 0.4374 | 5.4e-07 | 0.861783 | r2049865 | TRPS1 | Transcript | INTRONIC | intron                    |            |            |                   |            | 0          |   | 51 | 0.163 | 7     | 5 |   |
| 51 | 8:116476308_TA_T | 8 | 116476308 | T  | TA | 0.4404 | 4.7e-06 | 0.815252 | r2049865 | TRPS1 | Transcript | INTRONIC | intron,feature_truncation |            |            |                   |            | 0          |   | 51 | 0.051 | NA    | 5 |   |
| 51 | rs2737217        | 8 | 116583511 | G  | A  | 0.4225 | 8.9e-07 | 0.805189 | r2049865 | TRPS1 | Transcript | INTRONIC | intron                    |            |            |                   |            | 0          |   | 51 | 0.035 | 7     | 3 |   |
| 51 | rs2070481        | 8 | 116585157 | T  | C  | 0.4215 | 1.4e-06 | 0.942214 | r2049865 | TRPS1 | Transcript | INTRONIC | intron                    |            |            |                   |            | 0          |   | 51 | 0.031 | 6     | 4 |   |
| 51 | rs2737206        | 8 | 116611902 | C  | T  | 0.4294 | 7.9e-07 | 0.862291 | r2049865 | TRPS1 | Transcript | INTRONIC | intron                    |            |            |                   |            | 0          |   | 51 | 0.025 | 6     | 4 |   |
| 51 | rs1384812        | 8 | 116519075 | G  | T  | 0.4384 | 3.5e-07 | 0.858827 | r2049865 | TRPS1 | Transcript | INTRONIC | intron                    |            | AF178030.2 | Intergenic        | UPSTREAM   | upstream   | 0 |    | 51    | 0.016 | 7 | 5 |
| 51 | rs3808425        | 8 | 116515643 | A  | G  | 0.4394 | 3.8e-07 | 0.855319 | r2049865 | TRPS1 | Transcript | INTRONIC | intron                    |            | AF178030.2 | Intergenic        | UPSTREAM   | upstream   | 0 |    | 51    | 0.004 | 7 | 5 |
| 51 | rs3808426        | 8 | 116518834 | T  | A  | 0.4384 | 2.9e-07 | 0.858827 | r2049865 | TRPS1 | Transcript | INTRONIC | intron                    |            | AF178030.2 | Intergenic        | UPSTREAM   | upstream   | 0 |    | 51    | 0.004 | 5 | 5 |

***Supplementary Table 2: Genes implicated by positional, eQTL, or chromatin interaction mapping of SNPs associated with diverticular disease by FUMA***

To link the associated variants to genes, we applied three gene-mapping strategies as implemented in FUMA. Positional gene mapping aligned SNPs to 176 genes by genomic location located at the identified 51 distinct genomic risk loci for diverticulosis, by eQTL gene mapping matched with cis-eQTL SNPs to 269 genes whose expression levels they influence, and by chromatin interaction mapping annotated SNPs to 977 genes on the basis of 3D DNA–DNA interactions. This resulted in 1080 unique mapped genes, 176 of which were implicated by at least two mapping strategies and 97 of which were implicated by all three. The majority of these mapped genes are protein coding genes (n=657, 61%), while 39% are RNA genes (n=302) and pseudogenes (n=121). Loci for genes mapped by two genomic risk loci are listed as locus1:locus2. Abbreviations used in the column headers are coded as follows: pLI = probability of loss of function mutation intolerance (higher scores indicate higher probability); ncRVIS : Non-coding residual variation intolerance score. The higher the score is, the more intolerant to noncoding variants the gene is; posMapSNPs = SNPs mapped to this gene by positional mapping; eqtlMapSNPs = SNPs mapped to this gene by expression quantitative trait locus mapping; eqtlMapminP = minimum P value of eQTL association for the mapped gene; eqtlMapminQ = minimum false discovery rate Q value of eQTL association for the mapped gene; Tissues = tissues in which the significant eQTL association or chromatin interaction was observed; eqtlDirection = direction of association of eQTL SNP with expression levels (upregulation or downregulation); ciMap = chromatin interaction mapping; minGwasP = minimum GWAS P value of SNP(s) implicating the gene.





|                                                                                                                                                                                                                                                                                                                                                                                                                                                                                                                                                                                                                                                                                                                                                                                                                                                                                                                                                                                                                                                                                                                                                                                                                                                                                                                                                                                                                                                                                                                                                                                                                                                                                                                                                                                                                                                                                                                                                                                                                                                                                                                                                                                                                                                                                                                                                                                                                                                                                                                                                                                                                                                                                                                                                                                                                                                                                                                                                                                                                                                                                                                                                                                                                                                                                                                                                                                                                                                                                                                                                                                                                                                                                                                                                                                                                                                                                                                                                                                                                                                                                                                                                                                                                                                                                                                                                                                                                                                                                                                                                                                                                                                                                                                                                                                                                                                                                                                                                                                                                                                                                                                                                                                                                                                                                                                                                                                                                                                                                                                                                                                                                                                                                                                                                                                                                                                                                                                                                                                                                                                                                                                                                                                                                                                                                                                                                                                                                                                                                                                                                                                                                                                                                                                                                                                                                                                                                                                                                                                                                                                                                                                                                                                                                                                                                                                                                                                                                                                                                                                                                                                                                                                                                                                                                                                                                                                                                                                                                                                                                                                                                                                                                                                                                                                                                                                                                                                                                                                                                                                                                                                                                                                                                                                                                                                                                                                                                                                                                                                                                                                                                                                                                                                                                                                                                                                                                                                                                                                                                                                                                                                                                                                                                                                                                                                                                                                                                                                                                                                                                                                                                                                                                                                                                                                                                                                                                                                                                                                                                                                                                                                                                                                                                                                                                                                                                                                                                                                                                                                                                                                                                                                                                                                                                                                                                                                                                                                                                                                                                                                                                                                                                                                                                                                                                                                                                                                                                                                                                                                                                                                                                                                                                                                                                                                                                                                                                                                                                                                                                                                                                                                                                                                                                                                                                                                                                                                                                                                                                                                                                                                                                                                                                                                                                                                                                                                                                                                                                                                                                                                                                                                                                                                                                                                                                                                                                                                                                                                                                                                                                                                                                                                                                                                                                                                                                                                                                                                                                          |                 |       |        |          |   |          |          |                |         |                  |              |    |            |             |             |    |     |                                                  |
|--------------------------------------------------------------------------------------------------------------------------------------------------------------------------------------------------------------------------------------------------------------------------------------------------------------------------------------------------------------------------------------------------------------------------------------------------------------------------------------------------------------------------------------------------------------------------------------------------------------------------------------------------------------------------------------------------------------------------------------------------------------------------------------------------------------------------------------------------------------------------------------------------------------------------------------------------------------------------------------------------------------------------------------------------------------------------------------------------------------------------------------------------------------------------------------------------------------------------------------------------------------------------------------------------------------------------------------------------------------------------------------------------------------------------------------------------------------------------------------------------------------------------------------------------------------------------------------------------------------------------------------------------------------------------------------------------------------------------------------------------------------------------------------------------------------------------------------------------------------------------------------------------------------------------------------------------------------------------------------------------------------------------------------------------------------------------------------------------------------------------------------------------------------------------------------------------------------------------------------------------------------------------------------------------------------------------------------------------------------------------------------------------------------------------------------------------------------------------------------------------------------------------------------------------------------------------------------------------------------------------------------------------------------------------------------------------------------------------------------------------------------------------------------------------------------------------------------------------------------------------------------------------------------------------------------------------------------------------------------------------------------------------------------------------------------------------------------------------------------------------------------------------------------------------------------------------------------------------------------------------------------------------------------------------------------------------------------------------------------------------------------------------------------------------------------------------------------------------------------------------------------------------------------------------------------------------------------------------------------------------------------------------------------------------------------------------------------------------------------------------------------------------------------------------------------------------------------------------------------------------------------------------------------------------------------------------------------------------------------------------------------------------------------------------------------------------------------------------------------------------------------------------------------------------------------------------------------------------------------------------------------------------------------------------------------------------------------------------------------------------------------------------------------------------------------------------------------------------------------------------------------------------------------------------------------------------------------------------------------------------------------------------------------------------------------------------------------------------------------------------------------------------------------------------------------------------------------------------------------------------------------------------------------------------------------------------------------------------------------------------------------------------------------------------------------------------------------------------------------------------------------------------------------------------------------------------------------------------------------------------------------------------------------------------------------------------------------------------------------------------------------------------------------------------------------------------------------------------------------------------------------------------------------------------------------------------------------------------------------------------------------------------------------------------------------------------------------------------------------------------------------------------------------------------------------------------------------------------------------------------------------------------------------------------------------------------------------------------------------------------------------------------------------------------------------------------------------------------------------------------------------------------------------------------------------------------------------------------------------------------------------------------------------------------------------------------------------------------------------------------------------------------------------------------------------------------------------------------------------------------------------------------------------------------------------------------------------------------------------------------------------------------------------------------------------------------------------------------------------------------------------------------------------------------------------------------------------------------------------------------------------------------------------------------------------------------------------------------------------------------------------------------------------------------------------------------------------------------------------------------------------------------------------------------------------------------------------------------------------------------------------------------------------------------------------------------------------------------------------------------------------------------------------------------------------------------------------------------------------------------------------------------------------------------------------------------------------------------------------------------------------------------------------------------------------------------------------------------------------------------------------------------------------------------------------------------------------------------------------------------------------------------------------------------------------------------------------------------------------------------------------------------------------------------------------------------------------------------------------------------------------------------------------------------------------------------------------------------------------------------------------------------------------------------------------------------------------------------------------------------------------------------------------------------------------------------------------------------------------------------------------------------------------------------------------------------------------------------------------------------------------------------------------------------------------------------------------------------------------------------------------------------------------------------------------------------------------------------------------------------------------------------------------------------------------------------------------------------------------------------------------------------------------------------------------------------------------------------------------------------------------------------------------------------------------------------------------------------------------------------------------------------------------------------------------------------------------------------------------------------------------------------------------------------------------------------------------------------------------------------------------------------------------------------------------------------------------------------------------------------------------------------------------------------------------------------------------------------------------------------------------------------------------------------------------------------------------------------------------------------------------------------------------------------------------------------------------------------------------------------------------------------------------------------------------------------------------------------------------------------------------------------------------------------------------------------------------------------------------------------------------------------------------------------------------------------------------------------------------------------------------------------------------------------------------------------------------------------------------------------------------------------------------------------------------------------------------------------------------------------------------------------------------------------------------------------------------------------------------------------------------------------------------------------------------------------------------------------------------------------------------------------------------------------------------------------------------------------------------------------------------------------------------------------------------------------------------------------------------------------------------------------------------------------------------------------------------------------------------------------------------------------------------------------------------------------------------------------------------------------------------------------------------------------------------------------------------------------------------------------------------------------------------------------------------------------------------------------------------------------------------------------------------------------------------------------------------------------------------------------------------------------------------------------------------------------------------------------------------------------------------------------------------------------------------------------------------------------------------------------------------------------------------------------------------------------------------------------------------------------------------------------------------------------------------------------------------------------------------------------------------------------------------------------------------------------------------------------------------------------------------------------------------------------------------------------------------------------------------------------------------------------------------------------------------------------------------------------------------------------------------------------------------------------------------------------------------------------------------------------------------------------------------------------------------------------------------------------------------------------------------------------------------------------------------------------------------------------------------------------------------------------------------------------------------------------------------------------------------------------------------------------------------------------------------------------------------------------------------------------------------------------------------------------------------------------------------------------------------------------------------------------------------------------------------------------------------------------------------------------------------------------------------------------------------------------------------------------------------------------------------------------------------------------------------------------------------------------------------------------------------------------------------------------------------------------------------------------------------------------------------------------------------------------------------------------------------------------------------------------------------------------------------------------------------------------------------------------------------------------------------------------------------------------------------------------------------------------------------------------------------------------------------------------------------------------------------------------------------------------------------------------------------------------|-----------------|-------|--------|----------|---|----------|----------|----------------|---------|------------------|--------------|----|------------|-------------|-------------|----|-----|--------------------------------------------------|
| 1                                                                                                                                                                                                                                                                                                                                                                                                                                                                                                                                                                                                                                                                                                                                                                                                                                                                                                                                                                                                                                                                                                                                                                                                                                                                                                                                                                                                                                                                                                                                                                                                                                                                                                                                                                                                                                                                                                                                                                                                                                                                                                                                                                                                                                                                                                                                                                                                                                                                                                                                                                                                                                                                                                                                                                                                                                                                                                                                                                                                                                                                                                                                                                                                                                                                                                                                                                                                                                                                                                                                                                                                                                                                                                                                                                                                                                                                                                                                                                                                                                                                                                                                                                                                                                                                                                                                                                                                                                                                                                                                                                                                                                                                                                                                                                                                                                                                                                                                                                                                                                                                                                                                                                                                                                                                                                                                                                                                                                                                                                                                                                                                                                                                                                                                                                                                                                                                                                                                                                                                                                                                                                                                                                                                                                                                                                                                                                                                                                                                                                                                                                                                                                                                                                                                                                                                                                                                                                                                                                                                                                                                                                                                                                                                                                                                                                                                                                                                                                                                                                                                                                                                                                                                                                                                                                                                                                                                                                                                                                                                                                                                                                                                                                                                                                                                                                                                                                                                                                                                                                                                                                                                                                                                                                                                                                                                                                                                                                                                                                                                                                                                                                                                                                                                                                                                                                                                                                                                                                                                                                                                                                                                                                                                                                                                                                                                                                                                                                                                                                                                                                                                                                                                                                                                                                                                                                                                                                                                                                                                                                                                                                                                                                                                                                                                                                                                                                                                                                                                                                                                                                                                                                                                                                                                                                                                                                                                                                                                                                                                                                                                                                                                                                                                                                                                                                                                                                                                                                                                                                                                                                                                                                                                                                                                                                                                                                                                                                                                                                                                                                                                                                                                                                                                                                                                                                                                                                                                                                                                                                                                                                                                                                                                                                                                                                                                                                                                                                                                                                                                                                                                                                                                                                                                                                                                                                                                                                                                                                                                                                                                                                                                                                                                                                                                                                                                                                                                                                                                                        | ENSG00000003970 | SPY11 | SETP11 | 10041936 | 3 | 15080728 | 15080717 | 8.4e-11        | NA      | NA               | 39           | 0  | 11.3102146 | 7.52967e-12 | NA          | NA | Yes | NSC-Mycophenyl Stem Cell ARS018-04228 Transposon |
| 2                                                                                                                                                                                                                                                                                                                                                                                                                                                                                                                                                                                                                                                                                                                                                                                                                                                                                                                                                                                                                                                                                                                                                                                                                                                                                                                                                                                                                                                                                                                                                                                                                                                                                                                                                                                                                                                                                                                                                                                                                                                                                                                                                                                                                                                                                                                                                                                                                                                                                                                                                                                                                                                                                                                                                                                                                                                                                                                                                                                                                                                                                                                                                                                                                                                                                                                                                                                                                                                                                                                                                                                                                                                                                                                                                                                                                                                                                                                                                                                                                                                                                                                                                                                                                                                                                                                                                                                                                                                                                                                                                                                                                                                                                                                                                                                                                                                                                                                                                                                                                                                                                                                                                                                                                                                                                                                                                                                                                                                                                                                                                                                                                                                                                                                                                                                                                                                                                                                                                                                                                                                                                                                                                                                                                                                                                                                                                                                                                                                                                                                                                                                                                                                                                                                                                                                                                                                                                                                                                                                                                                                                                                                                                                                                                                                                                                                                                                                                                                                                                                                                                                                                                                                                                                                                                                                                                                                                                                                                                                                                                                                                                                                                                                                                                                                                                                                                                                                                                                                                                                                                                                                                                                                                                                                                                                                                                                                                                                                                                                                                                                                                                                                                                                                                                                                                                                                                                                                                                                                                                                                                                                                                                                                                                                                                                                                                                                                                                                                                                                                                                                                                                                                                                                                                                                                                                                                                                                                                                                                                                                                                                                                                                                                                                                                                                                                                                                                                                                                                                                                                                                                                                                                                                                                                                                                                                                                                                                                                                                                                                                                                                                                                                                                                                                                                                                                                                                                                                                                                                                                                                                                                                                                                                                                                                                                                                                                                                                                                                                                                                                                                                                                                                                                                                                                                                                                                                                                                                                                                                                                                                                                                                                                                                                                                                                                                                                                                                                                                                                                                                                                                                                                                                                                                                                                                                                                                                                                                                                                                                                                                                                                                                                                                                                                                                                                                                                                                                                                                                        | ENSG00001188271 | SP787 | OPR87  | 508187   | 3 | 15010181 | 15010740 | protein coding | 1.7e-11 | 0.29054804899993 | 0.1737777332 | 50 | 61         | 1.11012146  | 7.52967e-12 | NA | Yes | NSC-Mycophenyl Stem Cell ARS018-04228 Transposon |
| 3                                                                                                                                                                                                                                                                                                                                                                                                                                                                                                                                                                                                                                                                                                                                                                                                                                                                                                                                                                                                                                                                                                                                                                                                                                                                                                                                                                                                                                                                                                                                                                                                                                                                                                                                                                                                                                                                                                                                                                                                                                                                                                                                                                                                                                                                                                                                                                                                                                                                                                                                                                                                                                                                                                                                                                                                                                                                                                                                                                                                                                                                                                                                                                                                                                                                                                                                                                                                                                                                                                                                                                                                                                                                                                                                                                                                                                                                                                                                                                                                                                                                                                                                                                                                                                                                                                                                                                                                                                                                                                                                                                                                                                                                                                                                                                                                                                                                                                                                                                                                                                                                                                                                                                                                                                                                                                                                                                                                                                                                                                                                                                                                                                                                                                                                                                                                                                                                                                                                                                                                                                                                                                                                                                                                                                                                                                                                                                                                                                                                                                                                                                                                                                                                                                                                                                                                                                                                                                                                                                                                                                                                                                                                                                                                                                                                                                                                                                                                                                                                                                                                                                                                                                                                                                                                                                                                                                                                                                                                                                                                                                                                                                                                                                                                                                                                                                                                                                                                                                                                                                                                                                                                                                                                                                                                                                                                                                                                                                                                                                                                                                                                                                                                                                                                                                                                                                                                                                                                                                                                                                                                                                                                                                                                                                                                                                                                                                                                                                                                                                                                                                                                                                                                                                                                                                                                                                                                                                                                                                                                                                                                                                                                                                                                                                                                                                                                                                                                                                                                                                                                                                                                                                                                                                                                                                                                                                                                                                                                                                                                                                                                                                                                                                                                                                                                                                                                                                                                                                                                                                                                                                                                                                                                                                                                                                                                                                                                                                                                                                                                                                                                                                                                                                                                                                                                                                                                                                                                                                                                                                                                                                                                                                                                                                                                                                                                                                                                                                                                                                                                                                                                                                                                                                                                                                                                                                                                                                                                                                                                                                                                                                                                                                                                                                                                                                                                                                                                                                                                                        | ENSG00001081651 | SP711 | TS113  | 518213   | 3 | 15104410 | 15104106 | protein coding | 1.7e-11 | 0.1710312361051  | 0.140094349  | 20 | 68         | 1.13086126  | 5.60376e-17 | NA | Yes | NSC-Mycophenyl Stem Cell ARS018-04228 Transposon |
| GRC_HiSeq_v2, v3, v4, v5, v6, v7, v8, v9, v10, v11, v12, v13, v14, v15, v16, v17, v18, v19, v20, v21, v22, v23, v24, v25, v26, v27, v28, v29, v30, v31, v32, v33, v34, v35, v36, v37, v38, v39, v40, v41, v42, v43, v44, v45, v46, v47, v48, v49, v50, v51, v52, v53, v54, v55, v56, v57, v58, v59, v60, v61, v62, v63, v64, v65, v66, v67, v68, v69, v70, v71, v72, v73, v74, v75, v76, v77, v78, v79, v80, v81, v82, v83, v84, v85, v86, v87, v88, v89, v90, v91, v92, v93, v94, v95, v96, v97, v98, v99, v100, v101, v102, v103, v104, v105, v106, v107, v108, v109, v110, v111, v112, v113, v114, v115, v116, v117, v118, v119, v120, v121, v122, v123, v124, v125, v126, v127, v128, v129, v130, v131, v132, v133, v134, v135, v136, v137, v138, v139, v140, v141, v142, v143, v144, v145, v146, v147, v148, v149, v150, v151, v152, v153, v154, v155, v156, v157, v158, v159, v160, v161, v162, v163, v164, v165, v166, v167, v168, v169, v170, v171, v172, v173, v174, v175, v176, v177, v178, v179, v180, v181, v182, v183, v184, v185, v186, v187, v188, v189, v190, v191, v192, v193, v194, v195, v196, v197, v198, v199, v200, v201, v202, v203, v204, v205, v206, v207, v208, v209, v210, v211, v212, v213, v214, v215, v216, v217, v218, v219, v220, v221, v222, v223, v224, v225, v226, v227, v228, v229, v230, v231, v232, v233, v234, v235, v236, v237, v238, v239, v240, v241, v242, v243, v244, v245, v246, v247, v248, v249, v250, v251, v252, v253, v254, v255, v256, v257, v258, v259, v260, v261, v262, v263, v264, v265, v266, v267, v268, v269, v270, v271, v272, v273, v274, v275, v276, v277, v278, v279, v280, v281, v282, v283, v284, v285, v286, v287, v288, v289, v290, v291, v292, v293, v294, v295, v296, v297, v298, v299, v300, v301, v302, v303, v304, v305, v306, v307, v308, v309, v310, v311, v312, v313, v314, v315, v316, v317, v318, v319, v320, v321, v322, v323, v324, v325, v326, v327, v328, v329, v330, v331, v332, v333, v334, v335, v336, v337, v338, v339, v340, v341, v342, v343, v344, v345, v346, v347, v348, v349, v350, v351, v352, v353, v354, v355, v356, v357, v358, v359, v360, v361, v362, v363, v364, v365, v366, v367, v368, v369, v370, v371, v372, v373, v374, v375, v376, v377, v378, v379, v380, v381, v382, v383, v384, v385, v386, v387, v388, v389, v390, v391, v392, v393, v394, v395, v396, v397, v398, v399, v400, v401, v402, v403, v404, v405, v406, v407, v408, v409, v410, v411, v412, v413, v414, v415, v416, v417, v418, v419, v420, v421, v422, v423, v424, v425, v426, v427, v428, v429, v430, v431, v432, v433, v434, v435, v436, v437, v438, v439, v440, v441, v442, v443, v444, v445, v446, v447, v448, v449, v450, v451, v452, v453, v454, v455, v456, v457, v458, v459, v460, v461, v462, v463, v464, v465, v466, v467, v468, v469, v470, v471, v472, v473, v474, v475, v476, v477, v478, v479, v480, v481, v482, v483, v484, v485, v486, v487, v488, v489, v490, v491, v492, v493, v494, v495, v496, v497, v498, v499, v500, v501, v502, v503, v504, v505, v506, v507, v508, v509, v510, v511, v512, v513, v514, v515, v516, v517, v518, v519, v520, v521, v522, v523, v524, v525, v526, v527, v528, v529, v530, v531, v532, v533, v534, v535, v536, v537, v538, v539, v540, v541, v542, v543, v544, v545, v546, v547, v548, v549, v550, v551, v552, v553, v554, v555, v556, v557, v558, v559, v560, v561, v562, v563, v564, v565, v566, v567, v568, v569, v570, v571, v572, v573, v574, v575, v576, v577, v578, v579, v580, v581, v582, v583, v584, v585, v586, v587, v588, v589, v590, v591, v592, v593, v594, v595, v596, v597, v598, v599, v600, v601, v602, v603, v604, v605, v606, v607, v608, v609, v610, v611, v612, v613, v614, v615, v616, v617, v618, v619, v620, v621, v622, v623, v624, v625, v626, v627, v628, v629, v630, v631, v632, v633, v634, v635, v636, v637, v638, v639, v640, v641, v642, v643, v644, v645, v646, v647, v648, v649, v650, v651, v652, v653, v654, v655, v656, v657, v658, v659, v660, v661, v662, v663, v664, v665, v666, v667, v668, v669, v670, v671, v672, v673, v674, v675, v676, v677, v678, v679, v680, v681, v682, v683, v684, v685, v686, v687, v688, v689, v690, v691, v692, v693, v694, v695, v696, v697, v698, v699, v700, v701, v702, v703, v704, v705, v706, v707, v708, v709, v710, v711, v712, v713, v714, v715, v716, v717, v718, v719, v720, v721, v722, v723, v724, v725, v726, v727, v728, v729, v730, v731, v732, v733, v734, v735, v736, v737, v738, v739, v740, v741, v742, v743, v744, v745, v746, v747, v748, v749, v750, v751, v752, v753, v754, v755, v756, v757, v758, v759, v760, v761, v762, v763, v764, v765, v766, v767, v768, v769, v770, v771, v772, v773, v774, v775, v776, v777, v778, v779, v780, v781, v782, v783, v784, v785, v786, v787, v788, v789, v790, v791, v792, v793, v794, v795, v796, v797, v798, v799, v800, v801, v802, v803, v804, v805, v806, v807, v808, v809, v810, v811, v812, v813, v814, v815, v816, v817, v818, v819, v820, v821, v822, v823, v824, v825, v826, v827, v828, v829, v830, v831, v832, v833, v834, v835, v836, v837, v838, v839, v840, v841, v842, v843, v844, v845, v846, v847, v848, v849, v850, v851, v852, v853, v854, v855, v856, v857, v858, v859, v860, v861, v862, v863, v864, v865, v866, v867, v868, v869, v870, v871, v872, v873, v874, v875, v876, v877, v878, v879, v880, v881, v882, v883, v884, v885, v886, v887, v888, v889, v890, v891, v892, v893, v894, v895, v896, v897, v898, v899, v900, v901, v902, v903, v904, v905, v906, v907, v908, v909, v910, v911, v912, v913, v914, v915, v916, v917, v918, v919, v920, v921, v922, v923, v924, v925, v926, v927, v928, v929, v930, v931, v932, v933, v934, v935, v936, v937, v938, v939, v940, v941, v942, v943, v944, v945, v946, v947, v948, v949, v950, v951, v952, v953, v954, v955, v956, v957, v958, v959, v960, v961, v962, v963, v964, v965, v966, v967, v968, v969, v970, v971, v972, v973, v974, v975, v976, v977, v978, v979, v980, v981, v982, v983, v984, v985, v986, v987, v988, v989, v990, v991, v992, v993, v994, v995, v996, v997, v998, v999, v1000, v1001, v1002, v1003, v1004, v1005, v1006, v1007, v1008, v1009, v1010, v1011, v1012, v1013, v1014, v1015, v1016, v1017, v1018, v1019, v1020, v1021, v1022, v1023, v1024, v1025, v1026, v1027, v1028, v1029, v1030, v1031, v1032, v1033, v1034, v1035, v1036, v1037, v1038, v1039, v1040, v1041, v1042, v1043, v1044, v1045, v1046, v1047, v1048, v1049, v1050, v1051, v1052, v1053, v1054, v1055, v1056, v1057, v1058, v1059, v1060, v1061, v1062, v1063, v1064, v1065, v1066, v1067, v1068, v1069, v1070, v1071, v1072, v1073, v1074, v1075, v1076, v1077, v1078, v1079, v1080, v1081, v1082, v1083, v1084, v1085, v1086, v1087, v1088, v1089, v1090, v1091, v1092, v1093, v1094, v1095, v1096, v1097, v1098, v1099, v1100, v1101, v1102, v1103, v1104, v1105, v1106, v1107, v1108, v1109, v1110, v1111, v1112, v1113, v1114, v1115, v1116, v1117, v1118, v1119, v1120, v1121, v1122, v1123, v1124, v1125, v1126, v1127, v1128, v1129, v1130, v1131, v1132, v1133, v1134, v1135, v1136, v1137, v1138, v1139, v1140, v1141, v1142, v1143, v1144, v1145, v1146, v1147, v1148, v1149, v1150, v1151, v1152, v1153, v1154, v1155, v1156, v1157, v1158, v1159, v1160, v1161, v1162, v1163, v1164, v1165, v1166, v1167, v1168, v1169, v1170, v1171, v1172, v1173, v1174, v1175, v1176, v1177, v1178, v1179, v1180, v1181, v1182, v1183, v1184, v1185, v1186, v1187, v1188, v1189, v1190, v1191, v1192, v1193, v1194, v1195, v1196, v1197, v1198, v1199, v1200, v1201, v1202, v1203, v1204, v1205, v1206, v1207, v1208, v1209, v1210, v1211, v1212, v1213, v1214, v1215, v1216, v1217, v1218, v1219, v1220, v1221, v1222, v1223, v1224, v1225, v1226, v1227, v1228, v1229, v1230, v1231, v1232, v1233, v1234, v1235, v1236, v1237, v1238, v1239, v1240, v1241, v1242, v1243, v1244, v1245, v1246, v1247, v1248, v1249, v1250, v1251, v1252, v1253, v1254, v1255, v1256, v1257, v1258, v1259, v1260, v1261, v1262, v1263, v1264, v1265, v1266, v1267, v1268, v1269, v1270, v1271, v1272, v1273, v1274, v1275, v1276, v1277, v1278, v1279, v1280, v1281, v1282, v1283, v1284, v1285, v1286, v1287, v1288, v1289, v1290, v1291, v1292, v1293, v1294, v1295, v1296, v1297, v1298, v1299, v1300, v1301, v1302, v1303, v1304, v1305, v1306, v1307, v1308, v1309, v1310, v1311, v1312, v1313, v1314, v1315, v1316, v1317, v1318, v1319, v1320, v1321, v1322, v1323, v1324, v1325, v1326, v1327, v1328, v1329, v1330, v1331, v1332, v1333, v1334, v1335, v1336, v1337, v1338, v1339, v1340, v1341, v1342, v1343, v1344, v1345, v1346, v1347, v1348, v1349, v1350, v1351, v1352, v1353, v1354, v1355, v1356, v1357, v1358, v1359, v1360, v1361, v1362, v1363, v1364, v1365, v1366, v1367, v1368, v1369, v1370, v1371, v1372, v1373, v1374, v1375, v1376, v1377, v1378, v1379, v1380, v1381, v1382, v1383, v1384, v1385, v1386, v1387, v1388, v1389, v1390, v1391, v1392, v1393, v1394, v1395, v1396, v1397, v1398, v1399, v1400, v1401, v1402, v1403, v1404, v1405, v1406, v1407, v1408, v1409, v1410, v1411, v1412, v1413, v1414, v1415, v1416, v1417, v1418, v1419, v1420, v1421, v1422, v1423, v1424, v1425, v1426, v1427, v1428, v1429, v1430, v1431, v1432, v1433, v1434, v1435, v1436, v1437, v1438, v1439, v1440, v1441, v1442, v1443, v1444, v1445, v1446, v1447, v1448, v1449, v1450, v1451, v1452, v1453, v1454, v1455, v1456, v1457, v1458, v1459, v1460, v1461, v1462, v1463, v1464, v1465, v1466, v1467, v1468, v1469, v1470, v1471, v1472, v1473, v1474, v1475, v1476, v1477, v1478, v1479, v1480, v1481, v1482, v1483, v1484, v1485, v1486, v1487, v1488, v1489, v1490, v1491, v1492, v1493, v1494, v1495, v1496, v1497, v1498, v1499, v1500, v1501, v1502, v1503, v1504, v1505, v1506, v1507, v1508, v1509, v1510, v1511, v1512, v1513, v1514, v1515, v1516, v1517, v1518, v1519, v1520, v1521, v1522, v1523, v1524, v1525, v1526, v1527, v1528, v1529, v1530, v1531, v1532, v1533, v1534, v1535, v1536, v1537, v1538, v1539, v1540, v1541, v1542, v1543, v1544, v1545, v1546, v1547, v1548, v1549, v1550, v1551, v1552, v1553, v1554, v1555, v1556, v1557, v1558, v1559, v1560, v1561, v1562, v1563, v1564, v1565, v1566, v1567, v1568, v1569, v1570, v1571, v1572, v1573, v1574, v1575, v1576, v1577, v1578, v1579, v1580, v1581, v1582, v1583, v1584, v1585, v1586, v1587, v1588, v1589, v1590, v1591, v1592, v1593, v1594, v1595, v1596, v1597, v1598, v1599, v1600, v1601, v1602, v1603, v1604, v1605, v1606, v1607, v1608, v1609, v1610, v1611, v1612, v1613, v1614, v1615, v1616, v1617, v1618, v1619, v1620, v1621, v1622, v1623, v1624, v1625, v1626, v1627, v1628, v1629, v1630, v1631, v1632, v1633, v1634, v1635, v1636, v1637, v1638, v1639, v1640, v1641, v1642, v1643, v1644, v1645, v1646, v1647, v1648, v1649, v1650, v1651, v1652, v1653, v1654, v1655, v1656, v1657, v1658, v1659, v1660, v1661, v1662, v1663, v1664, v1665, v1666, v1667, v1668, v1669, v1670, v1671, v1672, v1673, v1674, v1675, v1676, v1677, v1678, v1679, v1680, v1681, v1682, v1683, v1684, v1685, v1686, v1687, v1688, v1689, v1690, v1691, v1692, v1693, v1694, v1695, v1696, v1697, v1698, v1699, v1700, v1701, v1702, v1703, v1704, v1705, v1706, v1707, v1708, v1709, v1710, v1711, v1712, v1713, v1714, v1715, v1716, v1717, v1718, v1719, v1720, v1721, v1722, v1723, v1724, v1725, v1726, v1727, v1728, v1729, v1730, v1731, v1732, v1733, v1734, v1735, v1736, v1737, v1738, v1739, v1740, v1741, v1742, v1743, v1744, v1745, v1746, v1747, v1748, v1749, v1750, v1751, v1752, v1753, v1754, v1755, v1756, v1757, v1758, v1759, v1760, v1761, v1762, v1763, v1764, v1765, v1766, v1767, v1768, v1769, v1770, v1771, v1772, v1773, v1774, v1775, v1776, v1777, v1778, v1779, v1780, v1781, v1782, v1783, v1784, v1785, v1786, v1787, v1788, v1789, v1790, v1791, v1792, v1793, v1794, v1795, v1796, v1797, v1798, v1799, v1800, v1801, v1802, v1803, v1804, v1805, v1806, v1807, v1808, v1809, v1810, v1811, v1812, v1813, v1814, v1815, v1816, v1817, v1818, v1819, v1820, v1821, v1822, v1823, v1824, v1825, v1826, v1827, v1828, v1829, v1830, v1831, v1832, v1833, v1834, v1835, v1836, v1837, v1838, v1839, v1840, v1841, v1842, v1843, v1844, v1845, v1846, v1847, v1848, v1849, v1850, v1851, v1852, v1853, v1854, v1855, v1856, v1857, v1858, v1859, v1860, v1861, v1862, v1863, v1864, v1865, v1866, v1867, v1868, v1869, v1870, v1871, v1872, v1873, v1874, v1875, v1876, v1877, v1878, v1879, v1880, v1881, v1882, v1883, v1884, v1885, v1886, v1887, v1888, v1889, v1890, v1891, v1892, v1893, v1894, v1895, v1896, v1897, v1898, v1899, v1900, v1901, v1902, v1903, v1904, v1905, v1906, v1907, v1908, v1909, v1910, v1911, v1912, v1913, v1914, v1915, v1916, v1917, v1918, v1919, v1920, v1921, v1922, v1923, v1924, v1925, v1926, v1927, v1928, v1929, v1930, v1931, v1932, v1933, v1934, v1935, v1936, v1937, v1938, v1939, v1940, v1941, v1942, v1943, v1944, v1945, v1946, v1947, v1948, v1949, v1950, v1951, v1952, v1953, v1954, v1955, v1956, v1957, v1958, v1959, v1960, v1961, v1962, v1963, v1964, v1965, v1966, v1967, v1968, v1969, v1970, v1971, v1972, v1973, v1974, v1975, v1976, v1977, v1978, v1979, v1980, v1981, v1982, v1983, v1984, v1985, v1986, v1987, v1988, v1989, v1990, v1991, v1992, v1993, v1994, v1995, v1996, v1997, v1998, v1999, v2000, v2001, v2002, v2003, v2004, v2005, v2006, v2007, v2008, v2009, v2010, v2011, v2012, v2013, v2014, v2015, v2016, v2017, v2018, v2019, v2020, v2021, v2022, v2023, v2024, v2025, v2026, v2027, v2028, v2029, v2030, v2031, v2032, v2033, v2034, v2035, v2036, v2037, v2038, v2039, v2040, v2041, v2042, v2043, v2044, v2045, v2046, v2047, v2048, v2049, v2050, v2051, v2052, v2053, v2054, v2055, v2056, v2057, v2058, v2059, v2060, v2061, v2062, v2063, v2064, v2065, v2066, v2067, v2068, v2069, v2070, v2071, v2072, v2073, v2074, v2075, v2076, v2077, v2078, v2079, v2080, v2081, v2082, v2083, v2084, v2085, v2086, v2087, v2088, v2089, v2090, v2091, v2092, v2093, v2094, v2095, v2096, v2097, v2098, v2099, v2100, v2101, v2102, v2103, v2104, v2105, v2106, v2107, v2108, v2109, v2110, v2111, v2112, v2113, v2114, v2115, v2116, v2117, v2118, v2119, v2120, v2121, v2122, v2123, v2124, v2125, v2126, v2127, v2128, v2129, v2130, v2131, v2132, v2133, v2134, v2135, v213 |                 |       |        |          |   |          |          |                |         |                  |              |    |            |             |             |    |     |                                                  |



[illegible]

[illegible]

|   |                 |              |            |           |    |          |          |            |          |                   |              |      |             |             |    |    |     |                                               |
|---|-----------------|--------------|------------|-----------|----|----------|----------|------------|----------|-------------------|--------------|------|-------------|-------------|----|----|-----|-----------------------------------------------|
| 1 | ENSG00000204832 | STES46.AS1   | STES46.AS1 | 100126088 | 10 | 17438915 | 1745550  | 2.76e-10   | NA       | 0                 | 0            | 0    | NA          | NA          | NA | NA | YES | NCSC-Mesenchymal Stem Cell-Mesenchymal        |
| 1 | ENSG0000025852  | SPFB2A2      | SPFB2A2    | 100131947 | 10 | 17619381 | 17620313 | psaeglucan | 2.76e-10 | NA                | 0            | 0    | NA          | NA          | NA | NA | YES | NCSC-Mesenchymal Stem Cell-Mesenchymal        |
| 1 | ENSG0000025853  | SPFB2A2      | SPFB2A2    | 100131948 | 10 | 17619388 | 17620303 | psaeglucan | 2.76e-10 | 0.2768823155538   | NA           | 0    | 0           | NA          | NA | NA | YES | NCSC-Mesenchymal Stem Cell-Mesenchymal        |
| 1 | ENSG00000260589 | SP1A.9004A.5 | SP1A.AS1   | 100272196 | 10 | 17602833 | 17608477 | arntanase  | 2.76e-10 | NA                | 0            | 0    | NA          | NA          | NA | NA | YES | NCSC-Mesenchymal                              |
| 1 | ENSG00000261728 | STAM         | STAM       | 8057      | 10 | 17680124 | 17737953 | protein    | 2.76e-10 | 0.902276080804    | 0.025607004  | 0    | 0           | NA          | NA | NA | YES | NCSC-Mesenchymal                              |
| 1 | ENSG00000261828 | SC3B1.1      | SC3B1.1    | 20075     | 10 | 18020785 | 18032223 | protein    | 2.76e-10 | 0.002090585133897 | 0.126473059  | 0    | 0           | NA          | NA | NA | YES | NCSC-Mesenchymal                              |
| 1 | ENSG00000262083 | SC3B1A2.1    | SC3B1A2.1  | 100129213 | 10 | 18020755 | 18238491 | arntanase  | 2.76e-10 | NA                | 0            | 28   | 1.50464e-15 | 1.81105e-15 | NA | NA | YES | NCSC-Mesenchymal Stem Cell-Mesenchymal        |
| 1 | ENSG00000262473 | ITIFB2P      | ITIFB2P    | 100126337 | 10 | 21117028 | 21139721 | psaeglucan | 3e-09    | NA                | 0            | 0    | NA          | NA          | NA | NA | YES | NCSC-Mesenchymal                              |
| 1 | ENSG00000262514 | MRP12A.2     | MRP12A.2   | 100841617 | 10 | 23881314 | 23881314 | protein    | 4.0e-10  | NA                | 0            | 0    | NA          | NA          | NA | NA | YES | NCSC-Mesenchymal                              |
| 1 | ENSG00000262512 | OTUD1        | OTUD1      | 220313    | 10 | 23737018 | 23731308 | protein    | 4.0e-10  | NA                | 0            | 0    | NA          | NA          | NA | NA | YES | NCSC-Mesenchymal                              |
| 1 | ENSG00000262649 | KIAA1237     | KIAA1237   | 56243     | 10 | 23093835 | 23480772 | protein    | 4.0e-13  | 0.014367094373996 | -0.482447167 | 0    | 0           | NA          | NA | NA | YES | NCSC-Mesenchymal                              |
| 1 | ENSG00000270793 | KRIB2        | KRIB2      | 2464214   | 10 | 2464214  | 2464210  | protein    | 4.0e-13  | NA                | 0            | 0    | NA          | NA          | NA | NA | YES | NCSC-Mesenchymal                              |
| 1 | ENSG00000270863 | AHRHA2P1     | AHRHA2P1   | 17584     | 10 | 24871538 | 25012397 | protein    | 4.0e-13  | 0.99944672007151  | 0.427480786  | 0    | 0           | NA          | NA | NA | YES | NCSC-Mesenchymal                              |
| 1 | ENSG00000270957 | NTVTC2       | NTVTC2     | 2137375   | 10 | 2137375  | 2137375  | protein    | 4.0e-13  | 0.718324481820    | 0.6486641    | 0    | 0           | NA          | NA | NA | YES | NCSC-Mesenchymal                              |
| 1 | ENSG00000271023 | FNOL3        | FNOL3      | 219670    | 10 | 25170059 | 25105099 | protein    | 4.0e-13  | 0.960084042081106 | 0.547300545  | 0    | 0           | NA          | NA | NA | YES | NCSC-Trophoblast                              |
| 1 | ENSG00000271847 | THN3L1       | THN3L1     | 78996     | 10 | 25105147 | 25115593 | protein    | 4.0e-13  | 5.6183088219396   | 1.59221866   | 0    | 0           | NA          | NA | NA | YES | NCSC-Trophoblast                              |
| 1 | ENSG00000272422 | FNOL3        | FNOL3      | 219670    | 10 | 25170059 | 25105099 | protein    | 4.0e-13  | 0.960084042081106 | 0.547300545  | 0    | 0           | NA          | NA | NA | YES | NCSC-Trophoblast                              |
| 1 | ENSG00000273162 | GNP13A.AS1   | GNP13A.AS1 | 100138131 | 10 | 25470061 | 25463205 | arntanase  | 4.0e-10  | NA                | 0            | 0    | NA          | NA          | NA | NA | YES | NCSC-Mesenchymal                              |
| 1 | ENSG00000273232 | SPR12        | SPR12      | 21512     | 10 | 25480911 | 25811215 | protein    | 4.0e-10  | 0.1650083438113   | 0.1802111    | 0.11 | 5.38339e-10 | 0.10506e-05 | NA | NA | YES | NCSC-Mesenchymal                              |
| 1 | ENSG00000274220 | NR750P.20    | NR750P.20  | 100480005 | 10 | 25604266 | 25627733 | mRNA       | 6e-09    | NA                | 0            | 0    | NA          | NA          | NA | NA | YES | NCSC-Mesenchymal Stem Cell-Artery-Mesenchymal |
| 1 | ENSG00000272740 | GP2P1        | GP2P1      | 100103589 | 10 | 25934909 | 25937033 | psaeglucan | 7.0e-22  | NA                | 2            | 0    | 0           | NA          | NA | NA | YES | NCSC-Mesenchymal                              |
| 1 | ENSG00000272753 | HRAP1        | HRAP1      | 19822545  | 10 | 25904046 | 25912552 | psaeglucan | 7.0e-22  | NA                | 0            | 0    | NA          | NA          | NA | NA | YES |                                               |





[illegible]



**Supplementary Table 3: Identification of curated lead candidate gene(s) (CCG) at the identified genomic risk locations for diverticular disease**

The table provides a per locus account of the manually curated selection of CCGs. The top two rows of the table provide the selection criteria used. For each locus, one row indicates the lead variant data (denoted as **L**) in column 3. If an additional proxy variant (denoted as **P**) in LD to the lead variant was utilized for selection of the CCG, a second row with the respective information was inserted. The decision criterion is noted in the row with the variant on which the decision was based. The decision criterion in the manually curated selection process is provided in Column 8. The criteria were traversed hierarchically from 1 to 6 as follows: **Criterion 1:** For lead variants located intronic, exonic, in the 3' or 5'UTR to a single annotated gene, the respective gene was identified as the CCG (30 out of 51 loci). **Criterion 2:** For variants located upstream or downstream to a single annotated gene, this gene was assigned as the CCG (12 out of 51 loci) if a variant in the CCG had at least an  $r^2 > 0.5$  to the lead variant at the locus. **Criterion 3:** For loci, where variants in more than one neighbouring or overlapping transcript showed significant LD ( $r^2 > 0.5$ ) to the lead variant, the transcript with higher expression in the tissue of interest (columns 14-16) was selected as the CCG (3 out of 51 loci). **Criterion 4:** For loci, where variants in more than one neighbouring or overlapping transcript showed significant LD ( $r^2 > 0.5$ ) to the lead variant and no clear differences in expression were evident, the CCG was selected if additional regulatory evidence was present, i.e. an eQTL in a tissue of interest according to GTEx\_v7 (column 12, 13) or a chromatin interaction (column 14) pointed to a particular gene (1 out of 51 loci). **Criterion 5:** If the lead variant was not located in a gene region and did not show significant LD to a variant in a neighbouring transcript, the impact of the lead variant and the variants in LD to the lead variant on regulatory elements (eQTLs or chromatin interaction) was evaluated. If such elements were identified, the closest respective gene was annotated as the CCG (4 out of 51 loci). **Criterion 6:** For the remaining loci, the closest transcript to the lead variant was annotated as a CCG if the distance to the variant was less than 1MB (1 out of 51 loci). Gene annotation are based on RefSeq Curated gene predictions from NCBI (pseudogenes were excluded from annotation) as implemented in UCSC Genome Browser (Ref. 6).

| Risk locus |     |                 |              |                        | CCG                     |                |               | <u>Decision criterion</u> | cis-eQTL           | cis-eQTL                                                           | 3D chromatin interaction                                                                    | mRNA expression normal sigmoid colon                                             |                                                                                               | Protein expression                                                                                                  |                                                                                                                                                                                                                        |
|------------|-----|-----------------|--------------|------------------------|-------------------------|----------------|---------------|---------------------------|--------------------|--------------------------------------------------------------------|---------------------------------------------------------------------------------------------|----------------------------------------------------------------------------------|-----------------------------------------------------------------------------------------------|---------------------------------------------------------------------------------------------------------------------|------------------------------------------------------------------------------------------------------------------------------------------------------------------------------------------------------------------------|
| Locus      | Chr | Position (hg19) | Variant      | R <sup>2</sup> to lead | P value discovery       | CCG            | Gene, Biotype | Variant location          | Decision criterion | Lead/proxy variant affects gene expression of CCG in sigmoid colon | Lead/proxy variant affects gene expression of CCG in other tissue (most sign. tissue shown) | Lead variant/proxy variant chromatin interaction with gene (FUMA; HiC; GSE87112) | mRNA expression in normal sigmoid colonic epithelium (SAGE tags/tissue) (Genecards, Ref. 1,6) | mRNA expression in muscularis propria of normal sigmoid colon (RNA-seq 100xFPKM) <sup>1/2</sup> (GTEx_v7, Ref. 1,2) | Colon- estimated protein expression log10(ppm) iBAQ <sup>DB</sup>   annotated protein expression <sup>§</sup> , single antibody staining <sup>AB</sup> , Endothelial cells  Glandular cells  Peripheral nerve/ganglion |
| 1          | 2   | 144314247       | rs6734367(L) | 1                      | 4.4 × 10 <sup>-55</sup> | ARHGAP15 (CCG) | protein-cod.  | intron                    | 1                  | no                                                                 | no                                                                                          |                                                                                  | 0                                                                                             | 2                                                                                                                   | 4                                                                                                                                                                                                                      |
| 2          | 1   | 234352899       | rs4333882(L) | 1                      | 2.5 × 10 <sup>-24</sup> | SLC35F3 (CCG)  | protein-cod.  | intron                    | 1                  | no                                                                 | no                                                                                          |                                                                                  | n/a                                                                                           | 0.6                                                                                                                 | 35 <sup>DB</sup>   med   high   med <sup>AB</sup>                                                                                                                                                                      |



|    |    |           |                |      |                       |                        |              |                   |   |                                               |                                                             |                                                                             |      |                                          |                        |
|----|----|-----------|----------------|------|-----------------------|------------------------|--------------|-------------------|---|-----------------------------------------------|-------------------------------------------------------------|-----------------------------------------------------------------------------|------|------------------------------------------|------------------------|
| 3  | 10 | 25819228  | rs7077800(L)   | 1    | $1.7 \times 10^{-22}$ | <i>GPR158</i> (CCG)    | protein-cod. | intron            | 1 | <i>GPR158</i> Colon – Sigmoid<br>P=1.1e-6     | <i>GPR158</i> Esophagus – Muscularis<br>P=2.5e-7            | 0                                                                           | 0.3  | low low low <sup>AB</sup>                |                        |
| 4  | 3  | 15502681  | rs7609897(L)   | 1    | $5.6 \times 10^{-22}$ | <i>COLQ</i> (CCG)      | protein-cod. | intron            | 1 | no                                            | no                                                          | 0                                                                           | 5    | n/a                                      |                        |
| 5  | 2  | 56093204  | rs1802575(L)   | 1    | $3.7 \times 10^{-19}$ | <i>EFEMP1</i> (CCG)    | protein-cod. | 3_prime_UTR       | 1 | no                                            | <i>EFEMP1</i> Skin<br>P=8.0e-7                              | 0                                                                           | 46   | colon (med) <sup>DB</sup>                |                        |
| 6  | 11 | 27748493  | rs17309930(L)  | 1    | $6.8 \times 10^{-17}$ | <i>BDNF</i> (CCG)      | protein-cod. | upstream (5kb)    |   | no                                            | no                                                          | 0                                                                           | 0.3  | nd low low <sup>AB</sup>                 |                        |
| 6  | 11 | 27723334  | rs56133711(P)  | 0.75 | $8.7 \times 10^{-15}$ | <i>BDNF</i> (CCG)      | protein-cod. | intron            | 2 | no                                            | no                                                          |                                                                             |      |                                          |                        |
| 7  | 19 | 38738130  | rs4802297(L)   | 1    | $2.0 \times 10^{-16}$ | <i>PPP1R14A</i> (CCG)  | protein-cod. | downstream (4 kb) |   | <i>PPP1R14A</i> Colon – Sigmoid<br>P= 2.2e-37 | <i>PPP1R14A</i> Esophagus – Muscularis<br>P= 5.1e-47        | 0                                                                           | 292  | med nd low <sup>S</sup>                  |                        |
| 7  | 19 | 38746567  | rs4803934(P)   | 0.92 | $4.8 \times 10^{-16}$ | <i>PPP1R14A</i> (CCG)  | protein-cod. | intron            | 2 |                                               |                                                             |                                                                             |      |                                          |                        |
| 8  | 9  | 136149229 | rs505922(L)    | 1    | $4.5 \times 10^{-15}$ | <i>ABO</i> (CCG)       | protein-cod. | intron            | 1 | <i>ABO</i> Colon – Sigmoid<br>P= 2.0e-13      | <i>ABO</i> Esophagus – Mucosa<br>P=1.2e-44                  | 7                                                                           | 1    | colonic epith. cell (high) <sup>DB</sup> |                        |
| 9  | 7  | 102474903 | rs72221075(L)  | 1    | $7.7 \times 10^{-15}$ | <i>FBXL13</i> (CCG)    | protein-cod. | intron            | 1 | no                                            | no                                                          | 0                                                                           | 0.3  | high low low <sup>S</sup>                |                        |
| 10 | 13 | 107897823 | rs9520339(L)   | 1    | $1.1 \times 10^{-14}$ | <i>FAM155A_1</i> (CCG) | protein-cod. | intron            | 1 | no                                            | no                                                          | n/a                                                                         | 1    | -  mod  -                                |                        |
| 11 | 13 | 108215404 | rs9555371(L)   | 1    | $1.2 \times 10^{-13}$ | <i>FAM155A_2</i> (CCG) | protein-cod. | intron            | 1 | no                                            | no                                                          | n/a                                                                         | 1    | -  mod  -                                |                        |
| 12 | 1  | 219294570 | rs61823192(L)  | 1    | $4.6 \times 10^{-14}$ | <i>LYPLAL1-ASI</i>     | antisense    | intron            | 1 | no                                            | no                                                          | n/a                                                                         | n/a  |                                          |                        |
| 13 | 10 | 101391169 | rs7098322(L)   | 1    | $9.2 \times 10^{-14}$ | <i>SLC25A28</i> (CCG)  | protein-cod. | upstream(11kb)    | 3 | no                                            | <i>SLC25A28</i> Adrenal Gland<br>P=6.9e-7                   | <i>SLC25A28</i> Mesenchymal_Stem_Cell<br>P=3.09e-127 (rs2300979<br>r2=0.99) | 3    | 97                                       | n/a                    |
| 13 | 10 | 101379280 | rs11190190(P)  | 1    | $1.2 \times 10^{-13}$ | <i>SLC25A28</i> (CCG)  | protein-cod. | intron            |   |                                               |                                                             |                                                                             |      |                                          |                        |
| 13 | 10 | 101391169 | rs7098322(L)   | 1    | $9.2 \times 10^{-14}$ | <i>ENTPD7</i>          | protein-cod. | upstream(28kb)    |   | no                                            | <i>ENTPD7</i> Cells - Transformed fibroblasts<br>P=1.2e-10, | <i>ENTPD7</i> Mesenchymal_Stem_Cell<br>P=7.09e-31                           | n/a  | 2                                        | nd low nd <sup>S</sup> |
| 13 | 10 | 101422423 | rs753642536(P) | 0.99 | $8.3 \times 10^{-14}$ | <i>ENTPD7</i>          | protein-cod. | intron            |   |                                               |                                                             |                                                                             |      |                                          |                        |
| 14 | 8  | 120456193 | rs60869342(L)  | 1    | $4.4 \times 10^{-13}$ | <i>NOV</i> (CCG)       | protein-cod. | downstream (20kb) |   | no                                            | no                                                          | <i>NOV</i> Mesenchymal_Stem_Cell<br>P=1.45e-38 (rs2085905<br>r2=0.75)       | 0    | 10                                       | nd nd nd <sup>S</sup>  |
| 14 | 8  | 120435812 | rs2071518(P)   | 0.79 | $5.8 \times 10^{-12}$ | <i>NOV</i> (CCG)       | protein-cod. | 3_prime_UTR       | 2 | <i>NOV</i> Colon – Sigmoid<br>P=1.7e-7        | <i>NOV</i> Esophagus – Muscularis<br>P=2.3e-12              |                                                                             |      |                                          |                        |
| 15 | 21 | 47399453  | rs111316530(L) | 1    | $4.8 \times 10^{-13}$ | <i>COL6A1</i> (CCG)    | protein-cod. | upstream (2kb)    |   | no                                            | no                                                          | 3                                                                           | 1915 | med  nd  nd <sup>S</sup>                 |                        |

|    |    |           |                |      |                       |                    |              |                   |   |                                     |                                                       |                                                                 |      |     |                            |                     |
|----|----|-----------|----------------|------|-----------------------|--------------------|--------------|-------------------|---|-------------------------------------|-------------------------------------------------------|-----------------------------------------------------------------|------|-----|----------------------------|---------------------|
| 15 | 21 | 47403155  | rs9974290(P)   | 0.95 | $2.4 \times 10^{-12}$ | COL6A1 (CCG)       | protein-cod. | intron            | 2 | no                                  | no                                                    |                                                                 |      |     |                            |                     |
| 16 | 7  | 73427600  | rs112609918(L) | 1    | $2.9 \times 10^{-12}$ | ELN (CCG)          | protein-cod. | upstream(15kb)    |   | no                                  | no                                                    | ELN IMR90<br>P= 1.20e-18                                        | 0    | 68  | colon                      | (med) <sup>DB</sup> |
| 16 | 7  | 73443245  | rs3823878(P)   | 0.69 | $1.7 \times 10^{-10}$ | ELN (CCG)          | protein-cod. | intron            | 2 | no                                  | no                                                    |                                                                 |      |     |                            |                     |
| 17 | 16 | 86233413  | rs2280028(L)   | 1    | $4.1 \times 10^{-12}$ | LINC01082 (CCG)    | lncRNA       | downstream (87bp) | 2 | no                                  | no                                                    | no                                                              | n/a  | 17  |                            |                     |
| 18 | 16 | 84857378  | rs2131755(L)   | 1    | $1.5 \times 10^{-11}$ | CRISPLD2 (CCG)     | protein-cod. | intron            | 1 | no                                  | CRISPLD2 Cells - Transformed fibroblasts<br>P=8.2e-16 |                                                                 | n/a  | 95  | low med med <sup>S</sup>   |                     |
| 19 | 6  | 98364895  | rs9482094(L)   | 1    | $1.6 \times 10^{-11}$ | LOC101927314 (CCG) | lincRNA      | intron            | 1 | no                                  | no                                                    |                                                                 | n/a  | n/a |                            |                     |
| 20 | 3  | 151074941 | rs3732760(L)   | 1    | $1.7 \times 10^{-11}$ | P2RY12 (CCG)       | protein-cod. | intron            | 4 | no                                  | P2RY12 Brain - basal ganglia<br>P=1.1e-5              | P2RY12 Mesenchymal_Stem_Cell<br>P=3.09e-37                      | 0    | 2   | low med low <sup>AB</sup>  |                     |
| 20 | 3  | 151074941 | rs3732760(L)   | 1    | $1.7 \times 10^{-11}$ | MED12L             | protein-cod. | intron            |   | no                                  | no                                                    | no                                                              | 3    | 0.2 | nd  nd  low <sup>S</sup>   |                     |
| 21 | 5  | 64295363  | rs10471645(L)  | 1    | $2.1 \times 10^{-11}$ | CWC27 (CCG)        | protein-cod. | intron            | 1 | no                                  | no                                                    |                                                                 | 0    | 18  | med high med <sup>S</sup>  |                     |
| 22 | 11 | 15065235  | rs575909118(L) | 1    | $2.8 \times 10^{-11}$ | CALCB (CCG)        | protein-cod. | upstream (30kb)   |   | no                                  | no                                                    | CALCB Mesendoderm<br>P=3.09e-37                                 | 0    | 0.6 | n/a                        |                     |
| 22 | 11 | 15098067  | rs1894128(P)   | 0.87 | $7.9 \times 10^{-10}$ | CALCB (CCG)        | protein-cod. | intron            | 2 | no                                  | no                                                    |                                                                 |      |     |                            |                     |
| 23 | 1  | 151970629 | rs61814883(L)  | 1    | $3.2 \times 10^{-11}$ | S100A10 (CCG)      | protein-cod. | upstream (4kb)    |   | S100A10 Colon – Sigmoid<br>P=2.9e-6 | S100A10 Brain – Cerebellum<br>P=7.2e-11               |                                                                 | 690  | 152 | high med high <sup>S</sup> |                     |
| 23 | 1  | 151962689 | rs12083193(P)  | 1    | $3.6 \times 10^{-11}$ | S100A10 (CCG)      | protein-cod. | intron            | 2 |                                     |                                                       |                                                                 |      |     |                            |                     |
| 24 | 5  | 37772780  | rs10472291(L)  | 1    | $3.8 \times 10^{-11}$ | WDR70              | protein-cod. | downstream (19kb) |   | no                                  | no                                                    | WDR70 Mesenchymal_Stem_Cell<br>P= 9.53e-24, IMR90<br>P=3.69e-21 | 3    | 22  | nd  nd  nd <sup>S</sup>    |                     |
| 24 | 5  | 37772780  | rs10472291(L)  | 1    | $3.8 \times 10^{-11}$ | GDNF (CCG)         | protein-cod. | downstream (40kb) | 5 | GDNF Colon – Sigmoid<br>P=0.008     | GDNF Brain - Cerebellum<br>P=6.0e-6                   | GDNF Mesenchymal_Stem_Cell<br>P=1.17e-25, IMR90<br>P=5.62e-15   | n/a  | 12  | nd  nd  nd <sup>S</sup>    |                     |
| 25 | 15 | 40649609  | rs71472433(L)  | 1    | $6.1 \times 10^{-11}$ | PHGR1 (CCG)        | protein-cod. | downstream (1kb)  | 3 | PHGR1 Colon – Sigmoid<br>P=1.8e-3   | PHGR1/Skin - Sun Exposed<br>P=3.1e-7                  | PHGR1 IMR90<br>P=7.84e-135                                      | 3299 | 7   | nd  high  nd <sup>S</sup>  |                     |
| 25 | 15 | 40645098  | rs7164581(P)   | 0.96 | $1.7 \times 10^{-10}$ | PHGR1 (CCG)        | protein-cod. | intron            |   |                                     |                                                       |                                                                 |      |     |                            |                     |
| 25 | 15 | 40649609  | rs71472433(L)  | 1    | $6.1 \times 10^{-11}$ | DISP2 (CCG)        | protein-cod. | upstream (1kb)    | 3 | DISP2 Colon – Sigmoid<br>P=5.2e-23  | DISP2 Skin - Sun Exposed<br>P=1.7e-43                 | DISP2 IMR90<br>P= 7.84e-135                                     | 7    | 0.9 | nd  nd  nd <sup>S</sup>    |                     |
| 25 | 15 | 40655444  | rs12913300(P)  | 0.9  | $1.6 \times 10^{-10}$ | DISP2 (CCG)        | protein-cod. | intron            |   |                                     |                                                       |                                                                 |      |     |                            |                     |
| 26 | 17 | 7372637   | rs12942267(L)  | 1    | $6.7 \times 10^{-11}$ | ZBTB4 (CCG)        | protein-     | intron            | 1 | ZBTB4 Colon –                       | ZBTB4 Esophagus                                       |                                                                 | 3    | 95  | low low low <sup>S</sup>   |                     |

| cod. |    |           |                |      |                         |                      |              |                                         |   |                                     |                         |                                              |      |                           | Sigmoid P 0.02             |  | – Mucosa<br>P=5.4e-8 |  |
|------|----|-----------|----------------|------|-------------------------|----------------------|--------------|-----------------------------------------|---|-------------------------------------|-------------------------|----------------------------------------------|------|---------------------------|----------------------------|--|----------------------|--|
| 27   | 15 | 76826003  | rs2056544(L)   | 1    | 9.8 × 10 <sup>-11</sup> | SCAPER (CCG)         | protein-cod. | intron                                  | 1 | no                                  | no                      | 0                                            | 9    | low med med <sup>§</sup>  |                            |  |                      |  |
| 28   | 7  | 96078564  | rs3113037(L)   | 1    | 1.0 × 10 <sup>-11</sup> | SEM1(C7orf76) (CCG ) | protein-cod. | downstream (13kb)                       |   | no                                  | no                      | SEM1 (C7orf76) hESC cells<br>P=5.05e-94      | n/a  | 49                        | low med med <sup>§</sup>   |  |                      |  |
| 28   | 7  | 96115099  | rs10281460(P)  | 0.93 | 2.0 × 10 <sup>-9</sup>  | SEM1(C7orf76) (CCG ) | protein-cod. | intron                                  | 2 | no                                  | no                      |                                              |      |                           |                            |  |                      |  |
| 29   | 18 | 20028737  | rs9960286(L)   | 1    | 2.3 × 10 <sup>-10</sup> | CTAGE1 (CCG)         | protein-cod. | intergenic 31kb upstream of gene        | 5 | no                                  | no                      | CTAGE1 IMR90 P=1.42e-282                     | 0    | 1                         | low med nd <sup>AB</sup>   |  |                      |  |
| 30   | 17 | 42312778  | rs8074740(L)   | 1    | 2.4 × 10 <sup>-10</sup> | SLC4A1               | protein-cod. | downstream (13kb)                       |   | no                                  | no                      | 3                                            | 0.02 | nd nd nd <sup>§</sup>     |                            |  |                      |  |
| 30   | 17 | 42326258  | rs5033(P)      | 0.92 | 3.6 × 10 <sup>-9</sup>  | SLC4A1               | protein-cod. | 3_prime_UTR                             |   | no                                  | no                      |                                              |      |                           |                            |  |                      |  |
| 30   | 17 | 42312778  | rs8074740(L)   | 1    | 2.4 × 10 <sup>-10</sup> | UBTF (CCG)           | protein-cod. | upstream(14kb)                          | 3 | no                                  | no                      | 17                                           | 49   | high high nd <sup>§</sup> |                            |  |                      |  |
| 30   | 17 | 42292476  | rs778428825(P) | 0.98 | 2.4 × 10 <sup>-9</sup>  | UBTF (CCG)           | protein-cod. | intron                                  |   | no                                  | no                      |                                              |      |                           |                            |  |                      |  |
| 31   | 10 | 18440444  | rs1888693(L)   | 1    | 2.7 × 10 <sup>-10</sup> | CACNB2 (CCG)         | protein-cod. | intron                                  | 1 | no                                  | no                      | 0                                            | 20   | nd low med <sup>AB</sup>  |                            |  |                      |  |
| 32   | 4  | 95821419  | rs3775010(L)   | 1    | 6.8 × 10 <sup>-10</sup> | BMPR2 (CCG)          | protein-cod. | intron                                  | 1 | no                                  | no                      | 0                                            | 1    | n/a <sup>§</sup>          |                            |  |                      |  |
| 33   | 8  | 122259074 | rs4871180(L)   | 1    | 1.1 × 10 <sup>-9</sup>  | HAS2 (CCG)           | protein-cod. | intergenic (366kb downstream from gene) | 5 | no                                  | no                      | HAS2 Mesenchymal_Stem_Cell<br>P=4.78e-46 ;   | 0    | 2                         | n/a <sup>§</sup>           |  |                      |  |
| 33   | 8  | 122259074 | rs4871180(L)   | 1    | 1.1 × 10 <sup>-9</sup>  | SNTB1                | protein-cod. | intergenic (435kb upstream from gene)   | 3 | no                                  | no                      | 0                                            | 5    | nd nd n/a <sup>§</sup>    |                            |  |                      |  |
| 34   | 9  | 78739440  | rs147496465(L) | 1    | 1.2 × 10 <sup>-9</sup>  | PCSK5 (CCG)          | protein-cod. | intron                                  | 1 | no                                  | no                      | 0                                            | 4    | nd med nd <sup>§</sup>    |                            |  |                      |  |
| 35   | 17 | 76856966  | rs1973232(L)   | 1    | 2.9 × 10 <sup>-9</sup>  | TIMP2 (CCG)          | protein-cod. | intron                                  | 1 | no                                  | no                      | 7                                            | 315  | med low low <sup>§</sup>  |                            |  |                      |  |
| 36   | 11 | 70005374  | rs875107(L)    | 1    | 3.7 × 10 <sup>-9</sup>  | ANO1 (CCG)           | protein-cod. | intron                                  | 1 | no                                  | no                      | 3                                            | 16   | nd med nd <sup>§</sup>    |                            |  |                      |  |
| 37   | 22 | 40695172  | rs6001870(L)   | 1    | 4.3 × 10 <sup>-9</sup>  | TNRC6B (CCG)         | protein-cod. | intron                                  | 1 | no                                  | no                      | n/a                                          | 7    | low med nd <sup>§</sup>   |                            |  |                      |  |
| 38   | 20 | 37493576  | rs208814(L)    | 1    | 9.0 × 10 <sup>-9</sup>  | PPP1R16B (CCG)       | protein-cod. | intron                                  | 1 | no                                  | no                      | 0                                            | 3    | n/a <sup>§</sup>          |                            |  |                      |  |
| 39   | 2  | 18937283  | rs62125298(L)  | 1    | 1.0 × 10 <sup>-8</sup>  | NT5C2 (CCG)          | protein-cod. | intergenic (166kb upstream from gene)   | 5 | no                                  | no                      | NT5C2 IMR90<br>P=3.63e-16                    | n/a  | 0.12                      | low high nd <sup>AB</sup>  |  |                      |  |
| 39   | 2  | 18937283  | rs62125298(L)  | 1    | 1.0 × 10 <sup>-8</sup>  | RDH14                | protein-cod. | (195kb upstream from gene)              |   | no                                  | no                      | RDH14 IMR90<br>P=1.49e-16                    | 3    | 31                        | med high high <sup>§</sup> |  |                      |  |
| 40   | 4  | 15386383  | rs4132788(L)   | 1    | 1.1 × 10 <sup>-8</sup>  | CIQTNF7 (CCG)        | protein-cod. | intron                                  | 3 | CIQTNF7 Colon – Sigmoid<br>P=0.0007 | CIQTNF7 Testis P=1.1e-7 | CIQTNF7 Mesenchymal_Stem_Cell<br>P=8.31e-141 | 3    | 10                        | med high nd <sup>AB</sup>  |  |                      |  |
| 40   | 4  | 15386383  | rs4132788(L)   | 1    | 1.1 × 10 <sup>-8</sup>  | LOC101929095         | antisense    | intron                                  |   | no                                  | no                      | n/a                                          | n/a  |                           |                            |  |                      |  |

|    |    |           |                |      |                      |                       |              |                                         |   |                                       |                                               |                                                                        |    |                                             |
|----|----|-----------|----------------|------|----------------------|-----------------------|--------------|-----------------------------------------|---|---------------------------------------|-----------------------------------------------|------------------------------------------------------------------------|----|---------------------------------------------|
| 41 | 5  | 122329729 | rs34126945(L)  | 1    | $1.2 \times 10^{-8}$ | <i>SNX24</i> (CCG)    | protein-cod. | intron                                  | 1 | no                                    | no                                            | n/a                                                                    | 6  | nd med nd <sup>§</sup>                      |
| 42 | 6  | 32609965  | rs7990(L)      | 1    | $1.4 \times 10^{-8}$ | <i>HLA-DQA1</i> (CCG) | protein-cod. | exon                                    | 1 | no                                    | <i>HLA-DQA1</i> Skin<br>P=1.2e-9              | 0                                                                      | 7  | colonic epithelial cell (med) <sup>DB</sup> |
| 43 | 10 | 124168942 | rs139760870(L) | 1    | $1.4 \times 10^{-8}$ | <i>PLEKHA1</i> (CCG)  | protein-cod. | intron                                  | 1 | no                                    | no                                            | 0                                                                      | 27 | med high low <sup>§</sup>                   |
| 44 | 10 | 105670849 | rs3752946(L)   | 1    | $1.8 \times 10^{-8}$ | <i>STN1</i> (CCG)     | protein-cod. | intron                                  | 1 | <i>STN1</i> Colon – Sigmoid P=0.01    | <i>STN1</i> Muscle – Skeletal P= 1.0e-5       | n/a                                                                    | 19 | n/a <sup>§</sup>                            |
| 45 | 1  | 221066373 | rs2784255(L)   | 1    | $2.0 \times 10^{-8}$ | <i>HLX</i> (CCG)      | protein-cod. | intergenic 8kb upstream of gene         |   | no                                    | no                                            | 7                                                                      | 41 | nd nd low <sup>§</sup>                      |
| 45 | 1  | 221081261 | rs2784272 (P)  | 0.98 | $2.8 \times 10^{-8}$ | <i>HLX</i> (CCG)      | protein-cod. | intergenic 23kb upstream                | 5 | no                                    | no                                            | <i>HLX</i><br>Mesenchymal_Stem_Cell<br>P=1.56e-67;<br>IMR90 P=3.19e-42 |    |                                             |
| 46 | 3  | 5843836   | rs7624168(L)   | 1    | $2.3 \times 10^{-8}$ | <i>EDEMI</i>          | protein-cod. | intergenic (582kb downstream from gene) | 6 | no                                    | no                                            | 14                                                                     | 14 | low med nd <sup>§</sup>                     |
| 47 | 2  | 33361425  | rs6714546(L)   | 1    | $2.4 \times 10^{-8}$ | <i>LTBP1</i> (CCG)    | protein-cod. | intron                                  | 1 | <i>LTBP1</i> Colon – Sigmoid P= 0.03  | <i>LTBP1</i> Thyroid P=7.9e-10                | 0                                                                      | 33 | nd low nd <sup>§</sup>                      |
| 48 | 13 | 33727605  | rs1473813(L)   | 1    | $2.9 \times 10^{-8}$ | <i>STARD13</i> (CCG)  | protein-cod. | intron                                  | 1 | no                                    | no                                            | 0                                                                      | 35 | low high low <sup>§</sup>                   |
| 49 | 15 | 68238462  | rs387505(L)    | 1    | $2.9 \times 10^{-8}$ | <i>PIAS1</i> (CCG)    | protein-cod. | intergenic (108kb upstream from gene)   | 5 | <i>PIAS1</i> Colon – Sigmoid P=2.1e-3 | <i>PIAS1</i> Esophagus – Muscularis P=2.7e-11 | <i>PIAS1</i><br>Mesenchymal_Stem_Cell P= 7.74e-98                      |    | high high med <sup>§</sup>                  |
| 49 | 15 | 68238462  | rs387505(L)    | 1    | $2.9 \times 10^{-8}$ | <i>SKOR1</i>          | protein-cod. | intergenic 112kb downstream from gene   |   | no                                    | no                                            | n/a                                                                    | 1  | nd n/a n/a <sup>§</sup>                     |
| 50 | 1  | 245773041 | rs12041565(L)  | 1    | $3.0 \times 10^{-8}$ | <i>KIF26B</i> (CCG)   | protein-cod. | intron                                  | 1 | no                                    | no                                            | 3                                                                      | 1  | med med nd <sup>§</sup>                     |
| 51 | 8  | 116588546 | rs2049865(L)   | 1    | $4.9 \times 10^{-8}$ | <i>TRPS1</i> (CCG)    | protein-cod. | intron                                  | 1 | no                                    | no                                            | 0                                                                      | 9  | n/a <sup>§</sup>                            |

§knowledge-based protein expression level<sup>§</sup> (nd –not detected, low, medium, high) or level of single antibody<sup>AB</sup> staining (nd –not detected, low, medium, high) observed in the annotated cell types from Human Protein Atlas database ([www.proteinatlas.org](http://www.proteinatlas.org), [Ref. 4](#)), if gene is not listed in Human Protein Atlas median protein expression level from Proteomics<sup>DB</sup> ([www.proteomicsdb.org](http://www.proteomicsdb.org), [Ref. 5](#)) is given. Fragments Per Kilobase of exon per Million fragments mapped (FPKM); log 10 normalized protein levels (‘intensity-based absolute quantification (iBAQ (Ref. 8) (data obtained from <https://www.genecards.org>, [Ref. 6](#)) n/a: no data available

### Cited Literature for Supplementary Table 3

Ref. 1: GTEx Consortium. The Genotype-Tissue Expression (GTEx) project. Nat Genet. 2013; 45(6):580-5.

Ref. 2: [https://biospecimens.cancer.gov/resources/sops/docs/GTEX\\_SOPs/](https://biospecimens.cancer.gov/resources/sops/docs/GTEX_SOPs/)

Ref. 3: Zhang L et al. Gene expression profiles in normal and cancer cells. *Science*. 1997; 276(5316):1268-72.

Ref. 4: Uhlén M et al. Tissue-based map of the human proteome. *Science*. 2015;347(6220):1260419.

Ref. 5: Schmidt T et al. ProteomicsDB. *Nucleic Acids Research*, Volume 46, Issue D1, 4 January 2018, Pages D1271–D1281

Ref. 6: Stelzer G. et al. The GeneCards Suite: From Gene Data Mining to Disease Genome Sequence Analysis, *Current Protocols in Bioinformatics* (2016), 54:1.30.1 - 1.30.33

Ref. 7: Veyrieras JB et al. High-resolution mapping of expression-QTLs yields insight into human gene regulation. *PLoS Genet*. 2008; 4(10):e1000214.

Ref. 8: Schwanhäusser B et al. Global quantification of mammalian gene expression control. *Nature*. 2011;473(7347):337-42

Ref. 9: Casper J et al. The UCSC Genome Browser database: 2018 update. *Nucleic Acids Res*. 2018;46(D1):D762-D769

***Supplementary Table 4: Results of GWAS analysis in diverticular disease present study in comparison to Maguire et al. (2018[1]).***

Results of GWAS and differentiation analyses in diverticular disease. Results are ordered by the *P*-value in the replication analysis for diverticular disease in European cohorts (column Q, present study). The gene annotation corresponds to the curated candidate gene, which selection is described in the Results and Supplementary Table 5.

***Reference for Supplementary Table 4:***

- 1 Maguire LH, Handelman SK, Du X, *et al.* Genome-wide association analyses identify 39 new susceptibility loci for diverticular disease. *Nat Genet* Published Online First: 2018. doi:10.1038/s41588-018-0203-z

Supplementary Table 4. Results of GWAS analysis in diverticular disease present study in comparison to Maguire et al. (2018[1]).

| current study<br>Chr | current study<br>Position | current study<br>rsID | current study<br>curated<br>candidate gene | current study<br>OR direction | current study<br>GWAS p-<br>value | current study<br>P value<br>replication | current study<br>Benjamini-<br>Hochberg<br>Adjusted P<br>value | current study<br>Significant<br>using an FDR<br>of 0.1 | risk differentiation<br>current study<br>p-value<br>diverticulitis vs.<br>diverticulosis | risk differentiation<br>current study<br>OR [CI 95%]<br>diverticulitis vs.<br>diverticulosis | Maguire et al.<br>GWAS p-<br>value | MGI replication<br>p-value<br>diverticulosis | MGI replication<br>p-value<br>diverticulitis | MGI replication<br>Significant<br>using an FDR<br>of 0.1 |
|----------------------|---------------------------|-----------------------|--------------------------------------------|-------------------------------|-----------------------------------|-----------------------------------------|----------------------------------------------------------------|--------------------------------------------------------|------------------------------------------------------------------------------------------|----------------------------------------------------------------------------------------------|------------------------------------|----------------------------------------------|----------------------------------------------|----------------------------------------------------------|
| 2                    | 144314247                 | rs6734367             | <u>ARHGAP15</u>                            | consistent                    | $4.4 \times 10^{-55}$             | $1.5 \times 10^{-7}$                    | 7.65E-06                                                       | YES                                                    | 0.160387                                                                                 | 1.11 [0.96-1.29]                                                                             | 4.29E-44                           | 0.0033                                       | 0.0669                                       | YES                                                      |
| 8                    | 120456193                 | rs60869342            | NOV                                        | consistent                    | $4.4 \times 10^{-13}$             | $3.0 \times 10^{-4}$                    | 8.93E-06                                                       | YES                                                    | 0.991565                                                                                 | 1.00 [0.86-1.16]                                                                             | 1.91E-10                           | 0.7440                                       | 0.6200                                       |                                                          |
| 7                    | 102474903                 | rs72221075            | FBXL13                                     | consistent                    | $7.7 \times 10^{-15}$             | $3.9 \times 10^{-4}$                    | 4.97E-03                                                       | YES                                                    | 0.744793                                                                                 | 1.02 [0.91-1.15]                                                                             | 3.74E-14                           | 0.1920                                       | 0.4680                                       |                                                          |
| 13                   | 108215404                 | rs9555371             | <u>FAM155A_2*</u>                          | consistent                    | $1.2 \times 10^{-13}$             | $3.5 \times 10^{-7}$                    | 5.10E-03                                                       | YES                                                    | <b>0.014783</b>                                                                          | <b>1.21 [1.04-1.42]</b>                                                                      | 1.70E-09                           | 0.0056                                       | 0.0242                                       | YES                                                      |
| 11                   | 70005374                  | rs875107              | ANO1                                       | consistent                    | $3.7 \times 10^{-9}$              | <b>0.001</b>                            | 1.02E-02                                                       | YES                                                    | 0.139587                                                                                 | 1.09 [0.97-1.23]                                                                             | 2.33E-09                           | 0.0005                                       | 0.1010                                       | YES                                                      |
| 1                    | 151970629                 | rs61814883            | S100A10                                    | consistent                    | $3.2 \times 10^{-11}$             | <b>0.003</b>                            | 1.70E-02                                                       | YES                                                    | <b>0.016011</b>                                                                          | <b>1.17 [1.03-1.33]</b>                                                                      | 2.05E-10                           | 0.4700                                       | 0.5980                                       |                                                          |
| 18                   | 20028737                  | rs9960286             | CTAGE1                                     | consistent                    | $2.3 \times 10^{-10}$             | <b>0.002</b>                            | 1.70E-02                                                       | YES                                                    | 0.834603                                                                                 | 1.01 [0.89-1.15]                                                                             | 6.64E-08                           | 0.0129                                       | 0.1990                                       |                                                          |
| 10                   | 25819228                  | rs7077800             | GPR158                                     | consistent                    | $1.7 \times 10^{-22}$             | <b>0.003</b>                            | 1.91E-02                                                       | YES                                                    | 0.583504                                                                                 | 1.03 [0.92-1.16]                                                                             | 5.37E-16                           | 0.1980                                       | 0.7650                                       |                                                          |
| 7                    | 73427600                  | rs112609918           | ELN                                        | consistent                    | $2.9 \times 10^{-12}$             | <b>0.004</b>                            | 2.04E-02                                                       | YES                                                    | 0.225221                                                                                 | 1.23 [0.88-1.72]                                                                             | 2.63E-09                           | 0.0032                                       | 0.8440                                       | YES                                                      |
| 10                   | 18440444                  | rs1888693             | CACNB2                                     | consistent                    | $2.7 \times 10^{-10}$             | <b>0.003</b>                            | 2.19E-02                                                       | YES                                                    | 0.115518                                                                                 | 1.10 [0.98-1.25]                                                                             | 3.58E-09                           | 0.0679                                       | 0.4290                                       |                                                          |
| 15                   | 68238462                  | rs387505              | PIAS1                                      | consistent                    | $2.9 \times 10^{-8}$              | <b>0.009</b>                            | 3.53E-02                                                       | YES                                                    | 0.053776                                                                                 | 1.12 [1.00-1.26]                                                                             | 2.55E-07                           | 0.5530                                       | 0.6820                                       |                                                          |
| 21                   | 47399453                  | rs111316530           | COL6A1                                     | consistent                    | $4.8 \times 10^{-13}$             | <b>0.009</b>                            | 3.83E-02                                                       | YES                                                    | 0.185996                                                                                 | 0.89 [0.76-1.06]                                                                             | 4.90E-11                           | 0.3620                                       | 0.9210                                       |                                                          |
| 9                    | 136149229                 | rs505922              | ABO                                        | consistent                    | $4.5 \times 10^{-15}$             | <b>0.011</b>                            | 4.01E-02                                                       | YES                                                    | 0.956971                                                                                 | 1.00 [0.88-1.13]                                                                             | 1.55E-11                           | 0.1490                                       | 0.0010                                       | YES                                                      |
| 3                    | 15502681                  | rs7609897             | <u>COLQ</u>                                | consistent                    | $5.6 \times 10^{-22}$             | <b>0.009</b>                            | 4.17E-02                                                       | YES                                                    | 0.197669                                                                                 | 0.91 [0.79-1.05]                                                                             | 2.72E-18                           | 0.0858                                       | 0.0085                                       |                                                          |
| 15                   | 40649609                  | rs71472433            | PHGR1/DISP2                                | consistent                    | $6.1 \times 10^{-11}$             | <b>0.014</b>                            | 4.76E-02                                                       | YES                                                    | <b>0.001127</b>                                                                          | <b>1.32 [1.12-1.56]</b>                                                                      | 8.90E-11                           | 0.6400                                       | 0.8250                                       |                                                          |
| 1                    | 221066373                 | rs2784255             | HLX                                        | consistent                    | $2.0 \times 10^{-8}$              | <b>0.023</b>                            | 5.33E-02                                                       | YES                                                    | 0.518459                                                                                 | 1.04 [0.93-1.17]                                                                             | 1.06E-08                           | 0.9420                                       | 0.5870                                       |                                                          |
| 6                    | 98364895                  | rs9482094             | LOC101927314                               | consistent                    | $1.6 \times 10^{-11}$             | <b>0.022</b>                            | 5.34E-02                                                       | YES                                                    | 0.575298                                                                                 | 1.04 [0.92-1.17]                                                                             | 1.62E-10                           | 0.8820                                       | 0.2610                                       |                                                          |
| 4                    | 95821419                  | rs3775010             | BMPR1B                                     | consistent                    | $6.8 \times 10^{-10}$             | <b>0.021</b>                            | 5.36E-02                                                       | YES                                                    | 0.433669                                                                                 | 0.95 [0.84-1.08]                                                                             | 5.74E-09                           | 0.0276                                       | 0.0006                                       | YES                                                      |
| 11                   | 15065235                  | rs575909118           | CALCB                                      | consistent                    | $2.8 \times 10^{-11}$             | <b>0.020</b>                            | 5.37E-02                                                       | YES                                                    | 0.013948                                                                                 | 1.17 [1.03-1.33]                                                                             | 6.20E-10                           | 0.3630                                       | 0.4640                                       |                                                          |
| 4                    | 15386383                  | rs4132788             | C1QTNF7                                    | consistent                    | $1.1 \times 10^{-8}$              | <b>0.019</b>                            | 5.38E-02                                                       | YES                                                    | 0.166202                                                                                 | 0.91 [0.80-1.04]                                                                             | 2.26E-07                           | 0.0792                                       | 0.9660                                       |                                                          |
| 3                    | 151074941                 | rs3732760             | P2RY12                                     | consistent                    | $1.7 \times 10^{-11}$             | <b>0.026</b>                            | 5.53E-02                                                       | YES                                                    | 0.803750                                                                                 | 1.02 [0.90-1.15]                                                                             | 8.80E-11                           | 0.1420                                       | 0.8330                                       |                                                          |
| 22                   | 40695172                  | rs6001870             | TNRC6B                                     | consistent                    | $4.3 \times 10^{-9}$              | <b>0.025</b>                            | 5.54E-02                                                       | YES                                                    | 0.996879                                                                                 | 1.00 [0.89-1.13]                                                                             | 1.30E-06                           | 0.4190                                       | 0.6240                                       |                                                          |
| 16                   | 86233413                  | rs2280028             | LINC01082                                  | consistent                    | $4.1 \times 10^{-12}$             | <b>0.019</b>                            | 5.70E-02                                                       | YES                                                    | 0.574601                                                                                 | 1.05 [0.88-1.25]                                                                             | 7.05E-11                           | 0.7390                                       | 0.0990                                       |                                                          |
| 13                   | 107897823                 | rs9520339             | FAM155A_1                                  | consistent                    | $1.1 \times 10^{-14}$             | <b>0.018</b>                            | 5.74E-02                                                       | YES                                                    | 0.058384                                                                                 | 1.14 [1.00-1.31]                                                                             | 5.23E-12                           | 0.0908                                       | 0.3550                                       |                                                          |
| 19                   | 38738130                  | rs4802297             | PPP1R14A                                   | consistent                    | $2.0 \times 10^{-16}$             | <b>0.029</b>                            | 5.92E-02                                                       | YES                                                    | 0.714050                                                                                 | 0.98 [0.87-1.10]                                                                             | 1.24E-14                           | 0.1030                                       | 0.0809                                       |                                                          |
| 3                    | 5843836                   | rs7624168             | EDEM1                                      | consistent                    | $2.3 \times 10^{-8}$              | <b>0.036</b>                            | 7.06E-02                                                       | YES                                                    | 0.542684                                                                                 | 1.05 [0.91-1.21]                                                                             | 4.51E-08                           | 0.9930                                       | 0.2040                                       |                                                          |
| 15                   | 76826003                  | rs2056544             | SCAPER                                     | consistent                    | $9.8 \times 10^{-11}$             | <b>0.039</b>                            | 7.37E-02                                                       | YES                                                    | 0.739139                                                                                 | 1.02 [0.91-1.15]                                                                             | 1.01E-07                           | 0.9960                                       | 0.0780                                       |                                                          |
| 7                    | 96078564                  | rs3113037             | SEM1                                       | consistent                    | $1.0 \times 10^{-11}$             | 0.070                                   | 1.28E-01                                                       | No                                                     | 0.225644                                                                                 | 1.09 [0.95-1.25]                                                                             | 2.52E-10                           | 0.0055                                       | 0.0041                                       | YES                                                      |
| 5                    | 122329729                 | rs34126945            | SNX24                                      | consistent                    | $1.2 \times 10^{-8}$              | 0.079                                   | 1.30E-01                                                       | No                                                     | 0.514753                                                                                 | 0.96 [0.85-1.09]                                                                             | 5.56E-08                           | 0.0163                                       | 0.0349                                       |                                                          |
| 17                   | 42312778                  | rs8074740             | UBTF                                       | consistent                    | $2.4 \times 10^{-10}$             | 0.077                                   | 1.31E-01                                                       | No                                                     | 0.311022                                                                                 | 1.07 [0.94-1.21]                                                                             | 2.34E-10                           | 0.9160                                       | 0.1100                                       |                                                          |
| 1                    | 219294570                 | rs61823192            | LYPLAL1-AS1                                | consistent                    | $4.6 \times 10^{-14}$             | 0.082                                   | 1.31E-01                                                       | No                                                     | 0.872225                                                                                 | 1.04 [0.68-1.58]                                                                             | 1.15E-13                           | 0.2010                                       | 0.0260                                       |                                                          |
| 10                   | 101391169                 | rs7098322             | SLC25A28                                   | consistent                    | $6.0 \times 10^{-14}$             | 0.076                                   | 1.34E-01                                                       | No                                                     | 0.171771                                                                                 | 1.13 [0.95-1.36]                                                                             | 9.94E-12                           | 0.6770                                       | 0.3220                                       |                                                          |
| 16                   | 84857378                  | rs2131755             | CRISPLD2                                   | consistent                    | $1.5 \times 10^{-11}$             | 0.095                                   | 1.47E-01                                                       | No                                                     | 0.567328                                                                                 | 0.97 [0.86-1.09]                                                                             | 1.50E-10                           | 0.0442                                       | 0.5450                                       |                                                          |
| 1                    | 234352899                 | rs4333882             | SLC35F3                                    | consistent                    | $2.5 \times 10^{-24}$             | 0.106                                   | 1.59E-01                                                       | No                                                     | 0.925027                                                                                 | 0.99 [0.86-1.14]                                                                             | 4.44E-22                           | 0.0010                                       | 0.1540                                       | YES                                                      |
| 2                    | 56093204                  | rs1802575             | EFEMP1                                     | consistent                    | $3.7 \times 10^{-19}$             | 0.111                                   | 1.62E-01                                                       | No                                                     | 0.442844                                                                                 | 0.93 [0.77-1.12]                                                                             | 7.71E-16                           | 0.0136                                       | 0.0004                                       |                                                          |
| 5                    | 37772780                  | rs10472291            | GDNF                                       | consistent                    | $3.8 \times 10^{-11}$             | 0.143                                   | 2.03E-01                                                       | No                                                     | 0.927492                                                                                 | 1.01 [0.89-1.14]                                                                             | 1.01E-11                           | 0.2270                                       | 0.9180                                       |                                                          |
| 10                   | 124168942                 | rs139760870           | PLEKHA1                                    | consistent                    | $1.4 \times 10^{-8}$              | 0.318                                   | 4.27E-01                                                       | No                                                     | 0.722197                                                                                 | 1.05 [0.79-1.40]                                                                             | 1.57E-07                           | 0.4070                                       | 0.5370                                       |                                                          |

|    |           |             |          |                 |                       |       |          |    |          |                  |          |        |        |
|----|-----------|-------------|----------|-----------------|-----------------------|-------|----------|----|----------|------------------|----------|--------|--------|
| 11 | 27748493  | rs17309930  | BDNF     | consistent      | $6.8 \times 10^{-17}$ | 0.335 | 4.38E-01 | No | 0.851469 | 1.01 [0.88-1.16] | 2.16E-14 | 0.0235 | 0.0598 |
| 8  | 122259074 | rs4871180   | HAS2     | consistent      | $1.1 \times 10^{-9}$  | 0.364 | 4.64E-01 | No | 0.742496 | 1.02 [0.90-1.16] | 4.15E-09 | 0.7000 | 0.8070 |
| 13 | 33727605  | rs1473813   | STARD13  | consistent      | $2.9 \times 10^{-8}$  | 0.507 | 6.16E-01 | No | 0.603133 | 1.03 [0.92-1.16] | 6.89E-07 | 0.4530 | 0.5200 |
| 2  | 33361425  | rs6714546   | LTBP1    | consistent      | $2.4 \times 10^{-8}$  | 0.552 | 6.40E-01 | No | 0.209217 | 0.92 [0.80-1.05] | 1.60E-06 | 0.2590 | 0.5890 |
| 8  | 116588546 | rs2049865   | TRPS1    | consistent      | $4.9 \times 10^{-8}$  | 0.550 | 6.52E-01 | No | 0.778372 | 1.02 [0.90-1.14] | 5.54E-09 | 0.6000 | 0.5220 |
| 5  | 64295363  | rs10471645  | CWC27    | consistent      | $2.1 \times 10^{-11}$ | 0.579 | 6.56E-01 | No | 0.123085 | 1.13 [0.97-1.33] | 3.03E-09 | 0.0409 | 0.0098 |
| 20 | 37493576  | rs208814    | PPP1R16B | consistent      | $9.0 \times 10^{-9}$  | 0.637 | 7.06E-01 | No | 0.832557 | 1.01 [0.90-1.15] | 9.75E-07 | 0.0906 | 0.5900 |
| 2  | 18937283  | rs62125298  | NT5C1B   | consistent      | $1.0 \times 10^{-8}$  | 0.714 | 7.59E-01 | No | 0.739499 | 1.03 [0.88-1.19] | 3.77E-08 | 0.6840 | 0.2470 |
| 6  | 32609965  | rs7990      | HLA-DQA1 | consistent      | $1.4 \times 10^{-8}$  | 0.739 | 7.69E-01 | No | 0.455626 | 1.06 [0.91-1.23] | N/A      | N/A    | N/A    |
| 17 | 76856966  | rs1973232   | TIMP2    | consistent      | $2.9 \times 10^{-9}$  | 0.764 | 7.79E-01 | No | 0.964098 | 1.00 [0.87-1.16] | 1.24E-07 | 0.8900 | 0.3440 |
| 9  | 78739440  | rs147496465 | PCSK5    | consistent      | $1.2 \times 10^{-9}$  | 0.818 | 8.18E-01 | No | 0.533972 | 1.04 [0.92-1.17] | 1.54E-08 | 0.8340 | 0.3650 |
| 1  | 245773041 | rs12041565  | KIF26B   | <b>opposite</b> | $3.0 \times 10^{-8}$  | 0.495 | 6.16E-01 | No | N/A      | N/A              | 1.46E-07 | 0.0350 | 0.1490 |
| 10 | 105670849 | rs3752946   | STN1     | <b>opposite</b> | $1.8 \times 10^{-8}$  | 0.668 | 7.25E-01 | No | N/A      | N/A              | 2.60E-06 | 0.3110 | 0.8420 |
| 17 | 7372637   | rs12942267  | ZBTB4    | <b>opposite</b> | $6.7 \times 10^{-11}$ | 0.175 | 2.41E-01 | No | N/A      | N/A              | 2.55E-08 | 0.0357 | 0.6970 |



## SUPPLEMENTARY TABLES

### Supplementary Table 5: GWAS lead variants and replication results

Results of GWAS analysis in diverticular disease. Results are ordered by the nominal P-value in the discovery analysis. The gene annotation corresponds to the candidate gene, which selection is described in the Methods and Supplementary Table 3. Rs-IDs of replication SNP which are proxies for the discovery variant are marked with an asterisk (\*) and pairwise LD ( $r^2$ ) to the discovery variant is provided. SNPs genotyped by TaqMan rather than iPLEX are indicated by a pound (#) sign. Variants at the *FAM155A-1* and *FAM155A-2* were in low LD ( $r^2=0.0043$ ) and thus considered as individual loci. In 48 out of 51 loci, the odds ratio direction was consistent between the discovery and replication cohorts. The 27 out of 51 loci which replicate at a nominal  $p<0.05$  are indicated by a bold gene name and replication P value. Odds ratios are based on the reference allele. The positions of lead variants were annotated according to Genome Reference Consortium Human Build 37 patch release 13 (GRCh37.p13).

| Discovery GWAS in UK Biobank |     |           |            |                          |                         |                  |         |           | Replication in European samples |     |     |                |                              |                  |              |    |
|------------------------------|-----|-----------|------------|--------------------------|-------------------------|------------------|---------|-----------|---------------------------------|-----|-----|----------------|------------------------------|------------------|--------------|----|
| locus                        | Chr | Position  | rsID       | Gene                     | P value                 | OR [CI 95%]      | Alt/Ref | MAF%      | rsID                            | Ref | Alt | r <sup>2</sup> | P value                      | OR               | OR direction | I2 |
| 1                            | 2   | 144314247 | rs6734367  | <i>ARHGAP15</i>          | 4.4 × 10 <sup>-55</sup> | 1.17 [1.15-1.19] | G/T     | 20.1/17.8 | rs6734367#                      | T   | G   | 1              | <b>1.5 × 10<sup>-7</sup></b> | 1.29 [1.17-1.42] | consistent   | 0  |
| 2                            | 1   | 234352899 | rs4333882  | <i>SLC35F3</i>           | 2.5 × 10 <sup>-24</sup> | 1.10 [1.08-1.13] | A/G     | 20.7/19.2 | rs4333882                       | G   | A   | 1              | 0.106                        | 1.08 [0.98-1.17] | consistent   | 28 |
| 3                            | 10  | 25819228  | rs7077800  | <i>GPR158</i>            | 1.7 × 10 <sup>-22</sup> | 0.93 [0.91-0.94] | C/T     | 45.7/47.6 | rs7086249*                      | C   | T   | 1              | <b>0.003</b>                 | 0.90 [0.83-0.96] | consistent   | 0  |
| 4                            | 3   | 15502681  | rs7609897  | <i>COLQ</i>              | 5.6 × 10 <sup>-22</sup> | 0.91 [0.89-0.93] | G/T     | 19.9/21.4 | rs7609897#                      | T   | G   | 1              | <b>0.009</b>                 | 0.89 [0.81-0.97] | consistent   | 24 |
| 5                            | 2   | 56093204  | rs1802575  | <i>EFEMP1</i>            | 3.7 × 10 <sup>-19</sup> | 1.11 [1.08-1.13] | G/C     | 14.5/13.3 | rs1802575                       | C   | G   | 1              | 0.111                        | 1.10 [0.98-1.25] | consistent   | 47 |
| 6                            | 11  | 27748493  | rs17309930 | <i>BDNF</i>              | 6.8 × 10 <sup>-17</sup> | 0.92 [0.91-0.94] | C/A     | 19.5/20.8 | rs962369*#                      | C   | T   | 0.50           | 0.335                        | 0.96 [0.88-1.04] | consistent   | 0  |
| 7                            | 19  | 38738130  | rs4802297  | <i>PPP1R14A</i>          | 2.0 × 10 <sup>-16</sup> | 1.06 [1.05-1.08] | C/G     | 49.8/48.2 | rs12976534*#                    | G   | A   | 1              | <b>0.029</b>                 | 1.08 [1.01-1.17] | consistent   | 15 |
| 8                            | 9   | 136149229 | rs505922   | <i>ABO</i>               | 4.5 × 10 <sup>-15</sup> | 0.94 [0.92-0.95] | T/C     | 30.2/31.8 | rs687621*                       | G   | A   | 0.96           | <b>0.011</b>                 | 0.91 [0.84-0.98] | consistent   | 0  |
| 9                            | 7   | 102474903 | rs72221075 | <i>FBXL13</i>            | 7.7 × 10 <sup>-15</sup> | 1.07 [1.05-1.08] | TA/-    | 35.2/33.6 | rs10257317*#                    | C   | T   | 0.93           | <b>3.9 × 10<sup>-4</sup></b> | 1.14 [1.06-1.23] | consistent   | 0  |
| 10                           | 13  | 107897823 | rs9520339  | <i>FAM155A_1</i>         | 1.1 × 10 <sup>-14</sup> | 0.93 [0.92-0.95] | C/T     | 22.7/24.0 | rs9520344*#                     | A   | T   | 1              | <b>0.018</b>                 | 0.90 [0.83-0.98] | consistent   | 0  |
| 11                           | 13  | 108215404 | rs9555371  | <i><u>FAM155A_2</u>*</i> | 1.2 × 10 <sup>-13</sup> | 0.93 [0.91-0.95] | A/G     | 18.7/19.8 | rs9555371#                      | G   | A   | 1              | <b>3.5 × 10<sup>-7</sup></b> | 0.79 [0.72-0.87] | consistent   | 55 |
| 12                           | 1   | 219294570 | rs61823192 | <i>LYPLAL1-AS1</i>       | 4.6 × 10 <sup>-14</sup> | 0.84 [0.80-0.88] | C/T     | 2.5/3.0   | rs61823192#                     | T   | C   | 1              | 0.082                        | 0.80 [0.62-1.03] | consistent   | 63 |

|    |    |           |             |                     |                       |                  |            |           |              |   |   |      |                      |                  |                 |    |
|----|----|-----------|-------------|---------------------|-----------------------|------------------|------------|-----------|--------------|---|---|------|----------------------|------------------|-----------------|----|
| 13 | 10 | 101391169 | rs7098322   | <i>SLC25A28</i>     | $6.0 \times 10^{-14}$ | 1.09 [1.07-1.12] | T/C        | 13.4/12.5 | rs7091203*   | A | G | 1    | 0.076                | 1.11 [0.99-1.25] | consistent      | 33 |
| 14 | 8  | 120456193 | rs60869342  | <i>NOV</i>          | $4.4 \times 10^{-13}$ | 0.94 [0.92-0.96] | A/T        | 23.0/24.2 | rs1381335*#  | T | C | 0.61 | $3.0 \times 10^{-4}$ | 0.85 [0.78-0.93] | consistent      | 21 |
| 15 | 21 | 47399453  | rs111316530 | <i>COL6A1</i>       | $4.8 \times 10^{-13}$ | 1.08 [1.06-1.10] | GTGTGTCA/- | 15.5/14.5 | rs7281388*   | A | C | 0.96 | <b>0.009</b>         | 1.16 [1.04-1.30] | consistent      | 0  |
| 16 | 7  | 73427600  | rs112609918 | <i>ELN</i>          | $2.9 \times 10^{-12}$ | 1.14 [1.10-1.18] | A/T        | 5.2/4.6   | rs112609918* | T | A | 1    | <b>0.004</b>         | 1.39 [1.11-1.74] | consistent      | 0  |
| 17 | 16 | 86233413  | rs2280028   | <i>LINC01082</i>    | $4.1 \times 10^{-12}$ | 0.93 [0.91-0.95] | G/A        | 13.2/14.2 | rs2280028    | A | G | 1    | <b>0.019</b>         | 0.88 [0.79-0.98] | consistent      | 0  |
| 18 | 16 | 84857378  | rs2131755   | <i>CRISPLD2</i>     | $1.5 \times 10^{-11}$ | 1.06 [1.04-1.07] | A/G        | 42.1/40.7 | rs2131755    | G | A | 1    | 0.095                | 1.07 [0.99-1.15] | consistent      | 0  |
| 19 | 6  | 98364895  | rs9482094   | <i>LOC101927314</i> | $1.6 \times 10^{-11}$ | 0.95 [0.93-0.96] | G/A        | 35.9/37.2 | rs4839715*#  | A | G | 1    | <b>0.022</b>         | 0.91 [0.85-0.99] | consistent      | 0  |
| 20 | 3  | 151074941 | rs3732760   | <i>P2RY12</i>       | $1.7 \times 10^{-11}$ | 1.06 [1.04-1.07] | A/C        | 38.7/37.3 | rs3732760    | C | A | 1    | <b>0.026</b>         | 1.09 [1.01-1.18] | consistent      | 0  |
| 21 | 5  | 64295363  | rs10471645  | <i>CWC27</i>        | $2.1 \times 10^{-11}$ | 1.07 [1.05-1.09] | C/T        | 17.5/16.5 | rs2968205*   | A | G | 1    | 0.579                | 1.03 [0.93-1.14] | consistent      | 0  |
| 22 | 11 | 15065235  | rs575909118 | <i>CALCB</i>        | $2.8 \times 10^{-11}$ | 1.06 [1.04-1.08] | -/T        | 28.6/27.5 | rs12293178*  | A | G | 0.95 | <b>0.020</b>         | 1.10 [1.02-1.19] | consistent      | 27 |
| 23 | 1  | 151970629 | rs61814883  | <i>S100A10</i>      | $3.2 \times 10^{-11}$ | 0.95 [0.93-0.96] | G/A        | 28.6/29.9 | rs61814883   | A | G | 1    | <b>0.003</b>         | 0.89 [0.82-0.96] | consistent      | 0  |
| 24 | 5  | 37772780  | rs10472291  | <i>GDNF</i>         | $3.8 \times 10^{-11}$ | 1.06 [1.04-1.07] | C/A        | 34.6/33.2 | rs10472291#  | A | C | 1    | 0.143                | 1.06 [0.98-1.14] | consistent      | 33 |
| 25 | 15 | 40649609  | rs71472433  | <i>PHGR1/DISP2</i>  | $6.1 \times 10^{-11}$ | 1.07 [1.05-1.09] | A/C        | 17.6/16.6 | rs71472433   | C | A | 1    | <b>0.014</b>         | 1.14 [1.03-1.27] | consistent      | 0  |
| 26 | 17 | 7372637   | rs12942267  | <i>ZBTB4</i>        | $6.7 \times 10^{-11}$ | 0.95 [0.93-0.96] | T/C        | 34.9/36.1 | rs9217*#     | C | T | 1    | 0.175                | 1.05 [0.98-1.14] | <b>opposite</b> | 29 |
| 27 | 15 | 76826003  | rs2056544   | <i>SCAPER</i>       | $9.8 \times 10^{-11}$ | 0.95 [0.94-0.96] | A/G        | 41.2/42.3 | rs12443137*  | G | T | 1    | <b>0.039</b>         | 0.93 [0.86-1.00] | consistent      | 43 |
| 28 | 7  | 96078564  | rs3113037   | <i>SEMI</i>         | $1.0 \times 10^{-11}$ | 1.06 [1.04-1.08] | C/T        | 24.4/23.2 | rs3113037    | T | C | 1    | 0.070                | 1.08 [0.99-1.18] | consistent      | 50 |
| 29 | 18 | 20028737  | rs9960286   | <i>CTAGE1</i>       | $2.3 \times 10^{-10}$ | 1.06 [1.04-1.08] | A/G        | 25.4/24.4 | rs2009593*   | G | C | 0.97 | <b>0.002</b>         | 1.14 [1.05-1.24] | consistent      | 0  |
| 30 | 17 | 42312778  | rs8074740   | <i>UBTF</i>         | $2.4 \times 10^{-10}$ | 1.05 [1.04-1.07] | G/A        | 33.4/32.1 | rs4793086*   | C | T | 0.98 | 0.077                | 1.07 [0.99-1.16] | consistent      | 38 |
| 31 | 10 | 18440444  | rs1888693   | <i>CACNB2</i>       | $2.7 \times 10^{-10}$ | 0.95 [0.94-0.97] | G/A        | 33.2/34.3 | rs1888693    | A | G | 1    | <b>0.003</b>         | 0.89 [0.82-0.96] | consistent      | 0  |
| 32 | 4  | 95821419  | rs3775010   | <i>BMPRI1B</i>      | $6.8 \times 10^{-10}$ | 1.05 [1.03-1.07] | T/C        | 37.0/35.8 | rs972409*#   | T | C | 1    | <b>0.021</b>         | 1.10 [1.01-1.19] | consistent      | 0  |
| 33 | 8  | 122259074 | rs4871180   | <i>HAS2</i>         | $1.1 \times 10^{-9}$  | 1.06 [1.04-1.07] | C/T        | 25.6/24.4 | rs4871180    | T | C | 0.97 | 0.364                | 1.04 [0.96-1.13] | consistent      | 4  |
| 34 | 9  | 78739440  | rs147496465 | <i>PCSK5</i>        | $1.2 \times 10^{-9}$  | 0.95 [0.94-0.97] | TCAGGAGG/- | 45.6/46.9 | rs7035893*   | C | T | 0.98 | 0.818                | 0.99 [0.92-1.07] | consistent      | 31 |
| 35 | 17 | 76856966  | rs1973232   | <i>TIMP2</i>        | $2.9 \times 10^{-9}$  | 1.06 [1.04-1.08] | A/G        | 19.3/18.5 | rs9909232    | A | C | 0.92 | 0.764                | 1.01 [0.92-1.11] | consistent      | 0  |
| 36 | 11 | 70005374  | rs875107    | <i>ANO1</i>         | $3.7 \times 10^{-9}$  | 1.05 [1.03-1.06] | A/C        | 49.6/48.2 | rs2276068*#  | C | G | 1    | <b>0.001</b>         | 1.14 [1.05-1.23] | consistent      | 0  |
| 37 | 22 | 40695172  | rs6001870   | <i>TNRC6B</i>       | $4.3 \times 10^{-9}$  | 1.05 [1.03-1.07] | A/C        | 36.1/35.1 | rs5995842*#  | G | C | 0.98 | <b>0.025</b>         | 1.09 [1.01-1.18] | consistent      | 2  |
| 38 | 20 | 37493576  | rs208814    | <i>PPP1R16B</i>     | $9.0 \times 10^{-9}$  | 1.05 [1.03-1.06] | G/A        | 36.6/35.5 | rs208814#    | A | G | 1    | 0.637                | 1.02 [0.94-1.10] | consistent      | 0  |
| 39 | 2  | 18937283  | rs62125298  | <i>NT5C1B</i>       | $1.0 \times 10^{-8}$  | 0.94 [0.92-0.96] | G/T        | 16.1/17.0 | rs4832619*#  | G | T | 1    | 0.714                | 0.98 [0.90-1.08] | consistent      | 15 |
| 40 | 4  | 15386383  | rs4132788   | <i>CIQTNF7</i>      | $1.1 \times 10^{-8}$  | 1.05 [1.03-1.07] | C/T        | 27.0/26.0 | rs4515160*#  | G | C | 1    | <b>0.019</b>         | 1.10 [1.02-1.20] | consistent      | 35 |
| 41 | 5  | 122329729 | rs34126945  | <i>SNX24</i>        | $1.2 \times 10^{-8}$  | 0.96 [0.94-0.97] | A/G        | 32.3/33.5 | rs34126945   | G | A | 1    | 0.079                | 0.93 [0.86-1.01] | consistent      | 47 |

|    |    |           |             |                 |                      |                  |     |           |              |   |   |      |              |                  |                 |    |
|----|----|-----------|-------------|-----------------|----------------------|------------------|-----|-----------|--------------|---|---|------|--------------|------------------|-----------------|----|
| 42 | 6  | 32609965  | rs7990      | <i>HLA-DQAI</i> | $1.4 \times 10^{-8}$ | 1.07 [1.05-1.09] | C/A | 10.5/9.9  | rs2395163*#  | C | T | 0.25 | 0.739        | 1.02 [0.92-1.12] | consistent      | 59 |
| 43 | 10 | 124168942 | rs139760870 | <i>PLEKHA1</i>  | $1.4 \times 10^{-8}$ | 0.91 [0.88-0.94] | G/A | 5.4/5.9   | rs117811194* | A | G | 1    | 0.318        | 0.91 [0.76-1.09] | consistent      | 0  |
| 44 | 10 | 105670849 | rs3752946   | <i>STN1</i>     | $1.8 \times 10^{-8}$ | 1.04 [1.03-1.06] | T/A | 49.5/48.6 | rs10748858*# | A | G | 0.84 | 0.668        | 0.98[0.88-1.09]  | <b>opposite</b> | 1  |
| 45 | 1  | 221066373 | rs2784255   | <i>HLX</i>      | $2.0 \times 10^{-8}$ | 0.96 [0.94-0.97] | T/C | 47.3/48.5 | rs2784255    | C | T | 1    | <b>0.023</b> | 0.92 [0.85-0.99] | consistent      | 0  |
| 46 | 3  | 5843836   | rs7624168   | <i>EDEMI</i>    | $2.3 \times 10^{-8}$ | 0.95 [0.93-0.97] | G/A | 21.5/22.6 | rs4684509*   | G | C | 1    | <b>0.036</b> | 0.91 [0.83-0.99] | consistent      | 8  |
| 47 | 2  | 33361425  | rs6714546   | <i>LTBP1</i>    | $2.4 \times 10^{-8}$ | 1.05 [1.03-1.07] | G/A | 30.1/29.1 | rs6714546#   | A | G | 1    | 0.552        | 1.03 [0.94-1.11] | consistent      | 0  |
| 48 | 13 | 33727605  | rs1473813   | <i>STARD13</i>  | $2.9 \times 10^{-8}$ | 0.96 [0.94-0.97] | G/A | 38.0/39.2 | rs1473813#   | A | G | 1    | 0.507        | 0.98 [0.90-1.05] | consistent      | 34 |
| 49 | 15 | 68238462  | rs387505    | <i>PIASI</i>    | $2.9 \times 10^{-8}$ | 1.04 [1.03-1.06] | C/T | 44.9/43.8 | rs387505#    | T | C | 1    | <b>0.009</b> | 1.10 [1.02-1.18] | consistent      | 0  |
| 50 | 1  | 245773041 | rs12041565  | <i>KIF26B</i>   | $3.0 \times 10^{-8}$ | 1.06 [1.04-1.08] | C/T | 19.0/18.1 | rs12041565#  | T | C | 1    | 0.495        | 0.97 [0.88-1.06] | <b>opposite</b> | 0  |
| 51 | 8  | 116588546 | rs2049865   | <i>TRPS1</i>    | $4.9 \times 10^{-8}$ | 0.96 [0.94-0.97] | A/C | 41.0/42.1 | rs6469600*#  | C | T | 1    | 0.550        | 0.98 [0.91-1.05] | consistent      | 20 |

## SUPPLEMENTARY TABLES

**Supplementary Table 6: Replicating loci ordered by discovery p-value**

Replicating risk loci for diverticular disease sorted by the discovery P-value. The data for the presented 27 loci that replicate in European colonoscopy cohorts.

| Discovery GWAS in UK Biobank |           |             |                   |             |                  |            |           | Replication in European colonoscopy samples |     |     |                |            |                  |            |    |
|------------------------------|-----------|-------------|-------------------|-------------|------------------|------------|-----------|---------------------------------------------|-----|-----|----------------|------------|------------------|------------|----|
| Chr                          | Position  | rsID        | Gene(s)           | P value     | OR [CI 95%]      | Alt/Ref    | MAF%      | rsID                                        | Ref | Alt | r <sup>2</sup> | P value    | OR               | OR-dir     | I2 |
| 2                            | 144314247 | rs6734367   | <u>ARHGAP15</u>   | 4.4 × 10-55 | 1.17 [1.15-1.19] | G/T        | 20.1/17.8 | rs6734367                                   | T   | G   | 1              | 1.5 × 10-7 | 1.29 [1.17-1.42] | consistent | 0  |
| 10                           | 25819228  | rs7077800   | GPR158            | 1.7 × 10-22 | 0.93 [0.91-0.94] | C/T        | 45.7/47.6 | rs7086249*                                  | C   | T   | 1              | 0.003      | 0.90 [0.83-0.96] | consistent | 0  |
| 3                            | 15502681  | rs7609897   | <u>COLO</u>       | 5.6 × 10-22 | 0.91 [0.89-0.93] | G/T        | 19.9/21.4 | rs7609897                                   | T   | G   | 1              | 0.009      | 0.89 [0.81-0.97] | consistent | 24 |
| 19                           | 38738130  | rs4802297   | PPP1R14A          | 2.0 × 10-16 | 1.06 [1.05-1.08] | C/G        | 49.8/48.2 | rs12976534*                                 | G   | A   | 1              | 0.029      | 1.08 [1.01-1.17] | consistent | 15 |
| 9                            | 136149229 | rs505922    | ABO               | 4.5 × 10-15 | 0.94 [0.92-0.95] | T/C        | 30.2/31.8 | rs687621*                                   | G   | A   | 0.96           | 0.011      | 0.91 [0.84-0.98] | consistent | 0  |
| 7                            | 102474903 | rs72221075  | FBXL13            | 7.7 × 10-15 | 1.07 [1.05-1.08] | TA/-       | 35.2/33.6 | rs10257317*                                 | C   | T   | 0.93           | 3.9 × 10-4 | 1.14 [1.06-1.23] | consistent | 0  |
| 13                           | 107897823 | rs9520339   | FAM155A_1         | 1.1 × 10-14 | 0.93 [0.92-0.95] | C/T        | 22.7/24.0 | rs9520344*                                  | A   | T   | 1              | 0.018      | 0.90 [0.83-0.98] | consistent | 0  |
| 13                           | 108215404 | rs9555371   | <u>FAM155A_2*</u> | 1.2 × 10-13 | 0.93 [0.91-0.95] | A/G        | 18.7/19.8 | rs9555371                                   | G   | A   | 1              | 3.5 × 10-7 | 0.79 [0.72-0.87] | consistent | 55 |
| 8                            | 120456193 | rs60869342  | NOV               | 4.4 × 10-13 | 0.94 [0.92-0.96] | A/T        | 23.0/24.2 | rs1381335*                                  | T   | C   | 0.61           | 3.0 × 10-4 | 0.85 [0.78-0.93] | consistent | 21 |
| 21                           | 47399453  | rs111316530 | COL6A1            | 4.8 × 10-13 | 1.08 [1.06-1.10] | GTGTGTCA/- | 15.5/14.5 | rs7281388*                                  | A   | C   | 0.96           | 0.009      | 1.16 [1.04-1.30] | consistent | 0  |
| 7                            | 73427600  | rs112609918 | ELN               | 2.9 × 10-12 | 1.14 [1.10-1.18] | A/T        | 5.2/4.6   | rs112609918*                                | T   | A   | 1              | 0.004      | 1.39 [1.11-1.74] | consistent | 0  |
| 16                           | 86233413  | rs2280028   | LINC01082         | 4.1 × 10-12 | 0.93 [0.91-0.95] | G/A        | 13.2/14.2 | rs2280028                                   | A   | G   | 1              | 0.019      | 0.88 [0.79-0.98] | consistent | 0  |
| 6                            | 98364895  | rs9482094   | LOC101927314      | 1.6 × 10-11 | 0.95 [0.93-0.96] | G/A        | 35.9/37.2 | rs4839715*                                  | A   | G   | 1              | 0.022      | 0.91 [0.85-0.99] | consistent | 0  |
| 3                            | 151074941 | rs3732760   | P2RY12            | 1.7 × 10-11 | 1.06 [1.04-1.07] | A/C        | 38.7/37.3 | rs3732760                                   | C   | A   | 1              | 0.026      | 1.09 [1.01-1.18] | consistent | 0  |
| 11                           | 15065235  | rs575909118 | CALCB             | 2.8 × 10-11 | 1.06 [1.04-1.08] | -/T        | 28.6/27.5 | rs12293178*                                 | A   | G   | 0.95           | 0.020      | 1.10 [1.02-1.19] | consistent | 27 |
| 1                            | 151970629 | rs61814883  | S100A10           | 3.2 × 10-11 | 0.95 [0.93-0.96] | G/A        | 28.6/29.9 | rs61814883                                  | A   | G   | 1              | 0.003      | 0.89 [0.82-0.96] | consistent | 0  |
| 15                           | 40649609  | rs71472433  | PHGR1/DISP2       | 6.1 × 10-11 | 1.07 [1.05-1.09] | A/C        | 17.6/16.6 | rs71472433                                  | C   | A   | 1              | 0.014      | 1.14 [1.03-1.27] | consistent | 0  |
| 15                           | 76826003  | rs2056544   | SCAPER            | 9.8 × 10-11 | 0.95 [0.94-0.96] | A/G        | 41.2/42.3 | rs12443137*                                 | G   | T   | 1              | 0.039      | 0.93 [0.86-1.00] | consistent | 43 |
| 18                           | 20028737  | rs9960286   | CTAGE1            | 2.3 × 10-10 | 1.06 [1.04-1.08] | A/G        | 25.4/24.4 | rs2009593*                                  | G   | C   | 0.97           | 0.002      | 1.14 [1.05-1.24] | consistent | 0  |

|    |           |           |                |                       |                  |     |           |            |   |   |      |       |                  |            |    |
|----|-----------|-----------|----------------|-----------------------|------------------|-----|-----------|------------|---|---|------|-------|------------------|------------|----|
| 10 | 18440444  | rs1888693 | <i>CACNB2</i>  | $2.7 \times 10^{-10}$ | 0.95 [0.94-0.97] | G/A | 33.2/34.3 | rs1888693  | A | G | 1    | 0.003 | 0.89 [0.82-0.96] | consistent | 0  |
| 4  | 95821419  | rs3775010 | <i>BMPRI1B</i> | $6.8 \times 10^{-10}$ | 1.05 [1.03-1.07] | T/C | 37.0/35.8 | rs972409*  | T | C | 1    | 0.021 | 1.10 [1.01-1.19] | consistent | 0  |
| 11 | 70005374  | rs875107  | <i>ANO1</i>    | $3.7 \times 10^{-9}$  | 1.05 [1.03-1.06] | A/C | 49.6/48.2 | rs2276068* | C | G | 1    | 0.001 | 1.14 [1.05-1.23] | consistent | 0  |
| 22 | 40695172  | rs6001870 | <i>TNRC6B</i>  | $4.3 \times 10^{-9}$  | 1.05 [1.03-1.07] | A/C | 36.1/35.1 | rs5995842* | G | C | 0.98 | 0.025 | 1.09 [1.01-1.18] | consistent | 2  |
| 4  | 15386383  | rs4132788 | <i>CIQTNF7</i> | $1.1 \times 10^{-8}$  | 1.05 [1.03-1.07] | C/T | 27.0/26.0 | rs4515160* | G | C | 1    | 0.019 | 1.10 [1.02-1.20] | consistent | 35 |
| 1  | 221066373 | rs2784255 | <i>HLX</i>     | $2.0 \times 10^{-8}$  | 0.96 [0.94-0.97] | T/C | 47.3/48.5 | rs2784255  | C | T | 1    | 0.023 | 0.92 [0.85-0.99] | consistent | 0  |
| 3  | 5843836   | rs7624168 | <i>EDEM1</i>   | $2.3 \times 10^{-8}$  | 0.95 [0.93-0.97] | G/A | 21.5/22.6 | rs4684509* | G | C | 1    | 0.036 | 0.91 [0.83-0.99] | consistent | 8  |
| 15 | 68238462  | rs387505  | <i>PIAS1</i>   | $2.9 \times 10^{-8}$  | 1.04 [1.03-1.06] | C/T | 44.9/43.8 | rs387505   | T | C | 1    | 0.009 | 1.10 [1.02-1.18] | consistent | 0  |

***Supplementary Table 7: Characteristics of patients used for RT-PCR of curated candidate transcripts in colon tissue***

The analyses for layer-specific and disease-specific expression in colonic anatomic layers were each performed in on the same PCR-plate to avoid batch- and plate effects. Thus, for each type of experiments, a respective set of patients was defined. The characteristics of the patient samples are provided below.

**Supplementary Table 7a:** Patients used for layer specific expression analysis in controls by RT-PCRs (mucosa, submucosa, muscle layer)

| <b>Patient group</b> | <b>Number of patients</b> | <b>Mean age [years]</b> | <b>Gender distribution</b> |
|----------------------|---------------------------|-------------------------|----------------------------|
| Control              | 7                         | 75,1                    | 5 women, 2 men             |

**Supplementary Table 7b:** Patients used for disease- and layer-specific expression analysis by RT-PCRs (mucosa, submucosa, muscle layer)

| <b>Patient group</b> | <b>Number of patients</b> | <b>Mean age [years]</b> | <b>Gender distribution</b> |
|----------------------|---------------------------|-------------------------|----------------------------|
| Control              | 20                        | 71,3                    | 11 women, 9 men            |
| Diverticulitis       | 21                        | 60,8                    | 13 women, 8 men            |
| Diverticulosis       | 13                        | 71,9                    | 5 women, 8 men             |

**Supplementary Table 8: Primer sequences used for real time (RT) PCR of colon tissue**

RT-PCR was performed for the top 20 replicating risk loci as shown in Supplementary Table 6. Pre-validated TaqMan® Assays (with the Applied Biosystems ID provided in the able) were used for RT-PCR in colonic tissue. For the remaining three transcripts, assays were designed manually.

| Risk locus        | Gene                | Assay         | Forward primer (5'-3')    | Reverse primer (5'-3')   | Probe (5'-3')                  |
|-------------------|---------------------|---------------|---------------------------|--------------------------|--------------------------------|
| ARHGAP15          | <i>ARHGAP15</i>     |               | AGGAGCTGTGCAAATGAGAATCA   | TGAATGATTCTTCTGTGTCTGGAT | AGCCACCATGACAGGCTCAGCCAAAGTA   |
| GPR158            | <i>GPR158</i>       |               | ACATCCGATCACCTCATCTTCAATA | CGATGGGACTGTCCGCAC       | TGCCTCATTGACCGCTGGGACTACATG    |
| COLQ              | <i>COLQ</i>         | Hs01552912_m1 |                           |                          |                                |
| PPP1R14A          | <i>PPP1R14A</i>     | Hs00264434_m1 |                           |                          |                                |
| ABO               | <i>ABO</i>          | Hs00220850_m1 |                           |                          |                                |
| FBXL13            | <i>FBXL13</i>       | Hs00376683_m1 |                           |                          |                                |
| FAM155A           | <i>FAM155A</i>      |               | GGCCTCTCCAGTTTCATCTGTACA  | TCCCTTTGGATGGGTTATTGA    | TGAACCAGAATGCTGTGACGTCAGGAGAGA |
| NOV               | <i>NOV</i>          | Hs00159631_m1 |                           |                          |                                |
| COL6A1            | <i>COL6A1</i>       | Hs01095585_m1 |                           |                          |                                |
| ELN               | <i>ELN</i>          | Hs00355783_m1 |                           |                          |                                |
| LINC01082         | <i>LINC01082</i>    | Hs01388639_m1 |                           |                          |                                |
| LOC101927314      | <i>LOC101927314</i> | Hs01384818_m1 |                           |                          |                                |
| P2RY12            | <i>P2RY12</i>       | Hs00224470_m1 |                           |                          |                                |
| CALCB             | <i>CALCB</i>        | Hs01119333_gH |                           |                          |                                |
| S100A10           | <i>S100A10</i>      | Hs00237010_m1 |                           |                          |                                |
| PHGR1:DISP2       | <i>PHGR1</i>        | Hs04188719_m1 |                           |                          |                                |
| PHGR1:DISP2       | <i>DISP2</i>        | Hs00394338_m1 |                           |                          |                                |
| SCAPER            | <i>SCAPER</i>       | Hs01065655_m1 |                           |                          |                                |
| CTAGE1            | <i>CTAGE1</i>       | Hs00535737_s1 |                           |                          |                                |
| CACNB2            | <i>CACNB2</i>       | Hs01100744_m1 |                           |                          |                                |
| BMPRI1B           | <i>BMPRI1B</i>      | Hs01010965_m1 |                           |                          |                                |
| Housekeeping gene | <i>HPRT</i>         |               | TGAACGTCTTGCTCGAGATGTG    | CCAGCAGGTCAGCAAAGAATT    | TGGGAGGCCATCACATTGTAGCC        |

**Supplementary Table 9: Results of differential expression analysis in controls**

Sigmoid colon layer specific expression of transcripts encoded by the curated candidate genes at top 20 replicating diverticular disease risk associated loci ranked by discovery p-value. Relative gene expression values are provided normalized to reference gene Hypoxanthine Phosphoribosyltransferase 1 (*HPRT1*). Median values with lower and upper quartile ranges shown in round brackets. The number of patients utilized after quality control is provided in square brackets. Nominal significant ( $p < 0.05$ ) differences in layer specific expression are marked in bold print. A graphical representation of the data is provided in Supplementary Figure 3.

| Gene             | Mucosa                        | Submucosa                   | Muscularis                 | P value (Kruskal-Wallis) |
|------------------|-------------------------------|-----------------------------|----------------------------|--------------------------|
| <i>ARHGAP15</i>  | 0.326 (0.224 - 0.437) [6]     | 0.415 (0.361 - 0.443) [7]   | 0.103 (0.093 - 0.172) [4]  | 0.0620                   |
| <i>GPR158</i>    | 0.003 (0.002 - 0.003) [4]     | 0.033 (0.027 - 0.041) [7]   | 0.012 (0.005 - 0.013) [5]  | <b>0.0014</b>            |
| <i>COLO</i>      | 0.020 (0.008 - 0.074) [6]     | 0.133 (0.116 - 0.188) [7]   | 0.044 (0.022 - 0.077) [5]  | <b>0.0357</b>            |
| <i>PPP1R14A</i>  | 3.548 (1.459 - 8.882) [7]     | 10.56 (7.577 - 11.355) [7]  | 49.21 (42.91 - 67.08) [6]  | <b>0.0053</b>            |
| <i>ABO</i>       | 3.963 (1.460 - 5.905) [7]     | 0.417 (0.404 - 0.552) [7]   | 0.282 (0.217 - 0.446) [6]  | <b>0.0025</b>            |
| <i>FBXL13</i>    | 0.069 (0.055 - 0.164) [5]     | 0.154 (0.136 - 0.192) [6]   | 0.114 (0.106 - 0.127) [4]  | 0.3072                   |
| <i>FAM155A</i>   | 0.013 (0.007 - 0.019) [4]     | 0.241 (0.180 - 0.302) [7]   | 0.067 (0.056 - 0.077) [4]  | <b>0.0024</b>            |
| <i>NOV</i>       | 0.610 (0.440 - 2.605) [7]     | 1.959 (1.523 - 2.435) [7]   | 1.170 (1.006 - 1.423) [6]  | 0.2256                   |
| <i>COL6A1</i>    | 1.120 (0.712 - 3.765) [7]     | 10.171 (6.650 - 12.323) [7] | 4.504 (4.104 - 4.545) [5]  | <b>0.0286</b>            |
| <i>ELN</i>       | 0.067 (0.032 - 0.160) [7]     | 0.705 (0.436 - 0.803) [7]   | 0.422 (0.187 - 0.573) [6]  | <b>0.0097</b>            |
| <i>LINC01082</i> | 2.027 (1.766 - 4.925) [7]     | 2.070 (1.407 - 3.063) [7]   | 1.921 (1.655 - 1.962) [6]  | 0.7073                   |
| <i>P2RY12</i>    | 0.365 (0.211 - 0.457) [7]     | 1.198 (0.975 - 1.291) [7]   | 1.058 (0.930 - 1.226) [6]  | <b>0.0111</b>            |
| <i>CALCB</i>     | 0.006 (0.004 - 0.009) [3]     | 0.023 (0.018 - 0.029) [4]   | 0.292 (0.213 - 0.338) [4]  | <b>0.0116</b>            |
| <i>S100A10</i>   | 45.44 (32.55 - 50.99) [7]     | 117.49 (94.67 - 129.63) [7] | 10.47 (10.20 - 12.92) [5]  | <b>0.0008</b>            |
| <i>PHGR1</i>     | 932.71 (475.52 - 1370.90) [7] | 104.95 (66.49 - 158.94) [7] | 97.02 (56.99 - 142.13) [6] | <b>0.0026</b>            |



|                     |                           |                           |                           |               |
|---------------------|---------------------------|---------------------------|---------------------------|---------------|
| <i>DISP2</i>        | 0.024 (0.015 - 0.053) [5] | 0.098 (0.091 - 0.223) [7] | 0.020 (0.020 - 0.035) [5] | <b>0.0029</b> |
| <i>SCAPER</i>       | 1.281 (0.831 - 4.077) [6] | 2.435 (2.005 - 2.729) [6] | 1.564 (1.469 - 1.884) [5] | 0.2296        |
| <i>CACNB2</i>       | 0.699 (0.501 - 1.579) [7] | 1.051 (0.920 - 1.600) [7] | 4.443 (3.355 - 5.274) [6] | 0.0552        |
| <i>BMPRI1B</i>      | 0.024 (0.012 - 0.073) [7] | 0.223 (0.191 - 0.230) [7] | 0.364 (0.245 - 0.440) [6] | <b>0.0093</b> |
| <i>CTAGE1</i>       | low expression            | low expression            | low expression            | N/A           |
| <i>LOC101927314</i> | low expression            | low expression            | low expression            | N/A           |

**Supplementary Table 10: Results of phenotype-specific expression analysis in anatomical layers of the colon**

Disease and layer specific expression of diverticular disease risk associated genes. Relative gene expression values in the mucosal, submucosal and muscularis layer are shown as median values with lower and upper quartile ranges in round brackets for the inflamed (diverticulitis) and non-inflamed (diverticulosis) disease stage and diverticula-free controls. Number of patients utilized after quality control is provided in square brackets. Relative gene expression values were normalized to housekeeping gene *HPRT1*. All expression values were normalized to the median of control individuals. Nominal significant ( $p < 0.05$ ) differences are marked in bold print. \*Diverticula (presence of diverticula); \*\* unpaired two-samples Wilcoxon test; \*\*\* global Kruskal-Wallis test by ranks

| Layer<br>(sigmoid colon) | Gene            | Control<br>/no diverticula/ (n) | Diverticula*<br>/D-itis & D-osis/ (n) | Control  <br>Diverticula<br>P ** | Diverticulitis<br>/D-itis/ (n) | Diverticulosis<br>/D-osis/ (n) | D-itis   D-osis<br>P ** | Control  <br>D-itis   D-osis<br>(global) P *** | Control  <br>D-itis<br>P ** | Control  <br>D-osis<br>P ** |
|--------------------------|-----------------|---------------------------------|---------------------------------------|----------------------------------|--------------------------------|--------------------------------|-------------------------|------------------------------------------------|-----------------------------|-----------------------------|
| Mucosa                   | <i>ARHGAP15</i> | 1.00 (0.89 - 1.78) [12]         | 1.75 (1.15 - 2.36) [25]               | 0.095                            | 2.02 (1.31 - 3.87) [13]        | 1.58 (0.99 - 1.89) [12]        | 0.29                    | 0.141                                          | 0.06                        | 0.34                        |
| Submucosa                | <i>ARHGAP15</i> | 1.00 (0.76 - 1.07) [16]         | 0.97 (0.77 - 1.12) [24]               | 0.879                            | 0.95 (0.84 - 1.03) [15]        | 1.07 (0.70 - 1.87) [9]         | 0.81                    | 0.921                                          | 0.95                        | 0.67                        |
| Muscularis               | <i>ARHGAP15</i> | 1.00 (0.84 - 1.34) [9]          | 1.96 (1.23 - 2.66) [25]               | <b>0.019</b>                     | 1.81 (1.15 - 2.52) [16]        | 2.19 (1.39 - 3.05) [9]         | 0.35                    | <b>0.039</b>                                   | 0.07                        | <b>0.02</b>                 |
| Mucosa                   | <i>GPR158</i>   | 1.00 (0.70 - 1.43) [8]          | 0.87 (0.69 - 1.05) [16]               | 0.520                            | 0.81 (0.64 - 0.96) [7]         | 0.90 (0.77 - 1.13) [9]         | 0.60                    | 0.686                                          | 0.45                        | 0.74                        |
| Submucosa                | <i>GPR158</i>   | 1.00 (0.88 - 1.43) [16]         | 1.43 (0.98 - 1.96) [23]               | 0.236                            | 1.59 (1.03 - 2.20) [15]        | 1.07 (0.88 - 1.58) [8]         | 0.32                    | 0.289                                          | 0.14                        | 0.83                        |
| Muscularis               | <i>GPR158</i>   | 1.00 (0.75 - 1.14) [3]          | 0.61 (0.40 - 1.21) [18]               | 0.451                            | 0.76 (0.39 - 1.17) [11]        | 0.46 (0.44 - 1.10) [7]         | 0.86                    | 0.714                                          | 0.53                        | 0.49                        |
| Mucosa                   | <i>COLQ</i>     | 1.00 (0.62 - 2.15) [8]          | 2.46 (0.78 - 8.60) [23]               | 0.232                            | 3.09 (1.11 - 19.43) [14]       | 0.61 (0.58 - 6.63) [9]         | 0.10                    | 0.077                                          | <b>0.04</b>                 | 0.81                        |
| Submucosa                | <i>COLQ</i>     | 1.00 (0.62 - 1.51) [16]         | 0.88 (0.54 - 1.63) [23]               | 0.721                            | 0.88 (0.65 - 1.54) [15]        | 0.82 (0.43 - 2.56) [8]         | 0.97                    | 0.925                                          | 0.68                        | 0.93                        |
| Muscularis               | <i>COLQ</i>     | 1.00 (0.56 - 2.88) [12]         | 0.91 (0.57 - 1.63) [24]               | 0.725                            | 1.37 (0.70 - 2.14) [15]        | 0.68 (0.57 - 0.89) [9]         | 0.14                    | 0.404                                          | 1.00                        | 0.46                        |
| Mucosa                   | <i>PPP1R14A</i> | 1.00 (0.70 - 1.59) [16]         | 1.20 (0.73 - 4.55) [28]               | 0.289                            | 1.77 (0.76 - 6.69) [15]        | 1.16 (0.72 - 2.16) [13]        | 0.38                    | 0.419                                          | 0.24                        | 0.55                        |

|            |                 |                         |                         |              |                         |                         |             |       |             |             |
|------------|-----------------|-------------------------|-------------------------|--------------|-------------------------|-------------------------|-------------|-------|-------------|-------------|
| Submucosa  | <i>PPP1R14A</i> | 1.00 (0.73 - 1.73) [16] | 1.08 (0.68 - 1.98) [23] | 0.830        | 1.30 (0.73 - 1.96) [14] | 0.77 (0.66 - 1.91) [9]  | 0.59        | 0.847 | 0.69        | 0.93        |
| Muscularis | <i>PPP1R14A</i> | 1.00 (0.65 - 1.42) [11] | 0.56 (0.37 - 0.70) [28] | <b>0.041</b> | 0.58 (0.37 - 0.74) [16] | 0.49 (0.38 - 0.66) [12] | 0.56        | 0.096 | 0.13        | <b>0.03</b> |
|            |                 |                         |                         |              |                         |                         |             |       |             |             |
| Mucosa     | <i>ABO</i>      | 1.00 (0.31 - 2.49) [16] | 0.53 (0.29 - 0.93) [28] | 0.360        | 0.37 (0.26 - 0.96) [15] | 0.56 (0.45 - 0.66) [13] | 0.33        | 0.345 | 0.15        | 0.98        |
| Submucosa  | <i>ABO</i>      | 1.00 (0.62 - 1.93) [16] | 0.90 (0.42 - 2.74) [23] | 0.989        | 0.86 (0.36 - 1.45) [15] | 2.71 (0.55 - 6.74) [8]  | 0.23        | 0.419 | 0.54        | 0.37        |
| Muscularis | <i>ABO</i>      | 1.00 (0.51 - 1.69) [10] | 0.53 (0.20 - 0.74) [23] | 0.057        | 0.47 (0.16 - 0.71) [13] | 0.71 (0.25 - 0.88) [10] | 0.56        | 0.127 | <b>0.04</b> | 0.24        |
|            |                 |                         |                         |              |                         |                         |             |       |             |             |
| Mucosa     | <i>FBXL13</i>   | 1.00 (0.94 - 1.87) [8]  | 0.89 (0.62 - 1.56) [23] | 0.289        | 0.95 (0.85 - 1.16) [10] | 0.83 (0.49 - 3.46) [13] | 0.60        | 0.471 | 0.56        | 0.23        |
| Submucosa  | <i>FBXL13</i>   | 1.00 (0.88 - 1.43) [16] | 1.43 (0.98 - 1.96) [23] | 0.236        | 1.59 (1.03 - 2.20) [15] | 1.07 (0.88 - 1.58) [8]  | 0.32        | 0.289 | 0.14        | 0.83        |
| Muscularis | <i>FBXL13</i>   | 1.00 (0.76 - 1.51) [9]  | 0.98 (0.61 - 1.94) [26] | 0.748        | 1.40 (0.55 - 2.33) [16] | 0.89 (0.65 - 1.13) [10] | 0.41        | 0.637 | 0.98        | 0.44        |
|            |                 |                         |                         |              |                         |                         |             |       |             |             |
| Mucosa     | <i>FAM155A</i>  | 1.00 (0.84 - 1.72) [7]  | 1.07 (0.79 - 1.53) [21] | 0.791        | 1.33 (0.90 - 1.54) [11] | 0.96 (0.65 - 1.29) [10] | 0.38        | 0.686 | 1.00        | 0.66        |
| Submucosa  | <i>FAM155A</i>  | 1.00 (0.68 - 1.20) [16] | 0.97 (0.50 - 1.40) [23] | 0.743        | 1.22 (0.94 - 1.53) [15] | 0.50 (0.39 - 0.69) [8]  | <b>0.02</b> | 0.015 | 0.26        | <b>0.01</b> |
| Muscularis | <i>FAM155A</i>  | 1.00 (0.72 - 2.26) [7]  | 1.54 (1.10 - 1.85) [23] | 0.590        | 1.20 (0.96 - 1.58) [14] | 1.81 (1.64 - 2.27) [9]  | 0.07        | 0.275 | 0.74        | 0.53        |
|            |                 |                         |                         |              |                         |                         |             |       |             |             |
| Mucosa     | <i>NOV</i>      | 1.00 (0.56 - 1.66) [15] | 0.76 (0.52 - 2.20) [26] | 0.989        | 0.77 (0.54 - 3.45) [13] | 0.72 (0.47 - 1.41) [13] | 0.36        | 0.627 | 0.65        | 0.61        |
| Submucosa  | <i>NOV</i>      | 1.00 (0.55 - 1.29) [16] | 0.76 (0.51 - 0.88) [23] | 0.134        | 0.78 (0.55 - 0.91) [15] | 0.63 (0.32 - 0.87) [8]  | 0.50        | 0.219 | 0.37        | 0.07        |
| Muscularis | <i>NOV</i>      | 1.00 (0.78 - 1.63) [11] | 0.77 (0.47 - 1.37) [26] | 0.189        | 0.96 (0.50 - 1.50) [16] | 0.69 (0.49 - 1.15) [10] | 0.62        | 0.333 | 0.42        | 0.11        |
|            |                 |                         |                         |              |                         |                         |             |       |             |             |
| Mucosa     | <i>COL6A1</i>   | 1.00 (0.66 - 1.85) [12] | 0.60 (0.34 - 2.85) [27] | 0.704        | 0.83 (0.57 - 7.57) [14] | 0.46 (0.26 - 0.91) [13] | 0.07        | 0.157 | 0.59        | 0.20        |
| Submucosa  | <i>COL6A1</i>   | 1.00 (0.23 - 1.70) [16] | 1.16 (0.78 - 1.59) [24] | 0.400        | 1.39 (1.01 - 1.61) [15] | 0.83 (0.46 - 1.57) [9]  | 0.40        | 0.519 | 0.31        | 0.80        |
| Muscularis | <i>COL6A1</i>   | 1.00 (0.67 - 1.85) [12] | 0.82 (0.50 - 1.36) [25] | 0.446        | 0.95 (0.63 - 1.40) [15] | 0.72 (0.44 - 1.00) [10] | 0.33        | 0.467 | 0.75        | 0.28        |
|            |                 |                         |                         |              |                         |                         |             |       |             |             |
| Mucosa     | <i>ELN</i>      | 1.00 (0.74 - 1.54) [11] | 0.75 (0.64 - 1.31) [20] | 0.421        | 0.77 (0.64 - 3.00) [11] | 0.73 (0.65 - 0.78) [9]  | 0.76        | 0.560 | 0.95        | 0.17        |
| Submucosa  | <i>ELN</i>      | 1.00 (0.07 - 1.34) [16] | 0.85 (0.46 - 1.17) [24] | 0.751        | 1.09 (0.85 - 1.39) [15] | 0.47 (0.40 - 0.63) [9]  | <b>0.03</b> | 0.186 | 0.42        | 0.63        |
| Muscularis | <i>ELN</i>      | 1.00 (0.82 - 2.56) [10] | 0.93 (0.81 - 2.23) [25] | 0.898        | 1.11 (0.87 - 2.58) [15] | 0.85 (0.73 - 1.44) [10] | 0.21        | 0.452 | 0.76        | 0.47        |

|            |                     |                         |                         |              |                         |                         |             |              |              |             |
|------------|---------------------|-------------------------|-------------------------|--------------|-------------------------|-------------------------|-------------|--------------|--------------|-------------|
|            |                     |                         |                         |              |                         |                         |             |              |              |             |
| Mucosa     | <i>LINC01082</i>    | 1.00 (0.70 - 2.12) [13] | 1.18 (0.82 - 1.95) [26] | 0.846        | 1.25 (0.81 - 2.28) [13] | 1.09 (0.85 - 1.44) [13] | 0.44        | 0.686        | 0.54         | 0.80        |
| Submucosa  | <i>LINC01082</i>    | 1.00 (0.87 - 1.18) [16] | 1.05 (0.73 - 1.40) [23] | 0.432        | 1.27 (0.96 - 1.54) [15] | 0.72 (0.62 - 1.11) [8]  | <b>0.04</b> | 0.080        | 0.11         | 0.44        |
| Muscularis | <i>LINC01082</i>    | 1.00 (0.66 - 1.96) [12] | 1.18 (0.63 - 1.43) [28] | 0.779        | 1.34 (0.95 - 1.43) [16] | 1.13 (0.62 - 1.45) [12] | 0.76        | 0.910        | 0.91         | 0.71        |
|            |                     |                         |                         |              |                         |                         |             |              |              |             |
| Mucosa     | <i>LOC101927314</i> | 1.00 (1.00 - 1.00) [1]  | 1.33 (0.41 - 1.94) [9]  | 1.000        | 1.39 (1.10 - 1.58) [4]  | 0.81 (0.26 - 3.27) [5]  | 0.90        | 0.911        | 0.72         | 1.00        |
| Submucosa  | <i>LOC101927314</i> | 1.00 (0.95 - 2.34) [9]  | 1.05 (0.65 - 1.58) [16] | 0.552        | 1.05 (0.71 - 1.67) [10] | 1.17 (0.67 - 1.48) [6]  | 0.96        | 0.824        | 0.54         | 0.77        |
| Muscularis | <i>LOC101927314</i> | 1.00 (0.98 - 1.02) [2]  | 3.20 (3.06 - 3.33) [2]  | 0.245        | 3.47 (3.47 - 3.47) [1]  | 2.93 (2.93 - 2.93) [1]  | 1.00        | 0.259        | 0.54         | 0.54        |
|            |                     |                         |                         |              |                         |                         |             |              |              |             |
| Mucosa     | <i>P2RY12</i>       | 1.00 (0.40 - 1.54) [13] | 0.72 (0.59 - 1.48) [23] | 0.921        | 0.65 (0.52 - 1.24) [11] | 0.87 (0.62 - 1.61) [12] | 0.56        | 0.867        | 0.95         | 0.81        |
| Submucosa  | <i>P2RY12</i>       | 1.00 (0.80 - 1.07) [16] | 1.03 (0.56 - 1.47) [23] | 0.786        | 1.16 (0.69 - 1.49) [14] | 0.72 (0.56 - 0.91) [9]  | 0.27        | 0.264        | 0.20         | 0.25        |
| Muscularis | <i>P2RY12</i>       | 1.00 (0.91 - 1.11) [11] | 0.91 (0.60 - 1.14) [26] | 0.344        | 0.73 (0.47 - 1.16) [16] | 0.95 (0.84 - 1.12) [10] | 0.41        | 0.474        | 0.29         | 0.65        |
|            |                     |                         |                         |              |                         |                         |             |              |              |             |
| Mucosa     | <i>CALCB</i>        | low expression          | low expression          | N/A          | low expression          | low expression          | N/A         | N/A          | N/A          | N/A         |
| Submucosa  | <i>CALCB</i>        | 1.00 (0.42 - 1.27) [14] | 1.13 (0.41 - 2.46) [22] | 0.465        | 1.56 (0.62 - 2.87) [14] | 0.49 (0.39 - 1.43) [8]  | 0.29        | 0.371        | 0.22         | 0.81        |
| Muscularis | <i>CALCB</i>        | 1.00 (0.97 - 1.73) [3]  | 0.13 (0.12 - 0.27) [12] | <b>0.012</b> | 0.12 (0.11 - 0.32) [7]  | 0.14 (0.13 - 0.17) [5]  | 1.00        | <b>0.034</b> | <b>0.02</b>  | <b>0.04</b> |
|            |                     |                         |                         |              |                         |                         |             |              |              |             |
| Mucosa     | <i>S100A10</i>      | 1.00 (0.73 - 1.33) [16] | 0.84 (0.63 - 1.40) [27] | 0.606        | 0.90 (0.69 - 1.41) [14] | 0.84 (0.60 - 1.23) [13] | 0.94        | 0.856        | 0.79         | 0.55        |
| Submucosa  | <i>S100A10</i>      | 1.00 (0.73 - 1.20) [16] | 1.21 (1.00 - 1.48) [23] | <b>0.047</b> | 1.37 (1.13 - 1.55) [14] | 1.01 (0.57 - 1.21) [9]  | 0.07        | <b>0.013</b> | <b>0.003</b> | 0.98        |
| Muscularis | <i>S100A10</i>      | 1.00 (0.77 - 1.74) [13] | 1.40 (1.11 - 1.95) [26] | 0.125        | 1.52 (1.31 - 1.86) [14] | 1.29 (1.05 - 2.01) [12] | 0.66        | 0.272        | 0.13         | 0.29        |
|            |                     |                         |                         |              |                         |                         |             |              |              |             |
| Mucosa     | <i>PHGR1</i>        | 1.00 (0.66 - 2.21) [13] | 0.99 (0.65 - 1.43) [29] | 0.624        | 0.87 (0.52 - 1.20) [16] | 1.07 (0.85 - 2.62) [13] | 0.12        | 0.231        | 0.23         | 0.64        |
| Submucosa  | <i>PHGR1</i>        | 1.00 (0.17 - 3.03) [16] | 2.03 (0.57 - 8.57) [23] | 0.134        | 1.78 (0.59 - 7.04) [14] | 3.33 (0.59 - 8.63) [9]  | 0.59        | 0.276        | 0.27         | 0.15        |
| Muscularis | <i>PHGR1</i>        | 1.00 (0.48 - 2.90) [12] | 1.21 (0.40 - 2.05) [25] | 0.685        | 1.28 (0.31 - 1.81) [15] | 1.13 (0.83 - 1.92) [10] | 0.93        | 0.850        | 0.45         | 0.87        |
|            |                     |                         |                         |              |                         |                         |             |              |              |             |
| Mucosa     | <i>DISP2</i>        | 1.00 (0.41 - 1.15) [12] | 0.66 (0.38 - 1.19) [20] | 0.425        | 0.51 (0.36 - 0.99) [10] | 0.74 (0.53 - 1.45) [10] | 0.47        | 0.564        | 0.34         | 0.72        |

|            |               |                         |                         |              |                         |                         |      |              |             |             |
|------------|---------------|-------------------------|-------------------------|--------------|-------------------------|-------------------------|------|--------------|-------------|-------------|
| Submucosa  | <i>DISP2</i>  | 1.00 (0.82 - 1.71) [16] | 1.36 (0.74 - 1.73) [23] | 0.875        | 1.37 (0.63 - 1.73) [15] | 1.35 (1.22 - 1.71) [8]  | 0.63 | 0.736        | 0.77        | 0.41        |
| Muscularis | <i>DISP2</i>  | 1.00 (0.57 - 1.92) [10] | 0.43 (0.28 - 0.74) [16] | <b>0.016</b> | 0.53 (0.30 - 0.79) [8]  | 0.43 (0.28 - 0.70) [8]  | 0.79 | <b>0.049</b> | 0.08        | <b>0.02</b> |
|            |               |                         |                         |              |                         |                         |      |              |             |             |
| Mucosa     | <i>SCAPER</i> | 1.00 (0.53 - 2.24) [12] | 0.72 (0.47 - 2.10) [26] | 0.695        | 1.19 (0.69 - 2.51) [13] | 0.57 (0.33 - 1.19) [13] | 0.10 | 0.232        | 0.68        | 0.26        |
| Submucosa  | <i>SCAPER</i> | 1.00 (0.67 - 1.24) [16] | 1.14 (0.57 - 1.60) [23] | 0.764        | 1.11 (0.64 - 1.26) [14] | 1.60 (0.45 - 1.73) [9]  | 0.51 | 0.878        | 0.79        | 0.84        |
| Muscularis | <i>SCAPER</i> | 1.00 (0.71 - 1.07) [11] | 0.78 (0.57 - 1.28) [28] | 0.564        | 1.02 (0.63 - 1.80) [16] | 0.73 (0.49 - 0.80) [12] | 0.20 | 0.258        | 0.75        | 0.12        |
|            |               |                         |                         |              |                         |                         |      |              |             |             |
| Mucosa     | <i>CACNB2</i> | 1.00 (0.65 - 1.21) [13] | 0.73 (0.53 - 1.12) [24] | 0.556        | 0.68 (0.46 - 1.13) [11] | 0.77 (0.56 - 1.09) [13] | 0.82 | 0.802        | 0.52        | 0.72        |
| Submucosa  | <i>CACNB2</i> | 1.00 (0.72 - 1.18) [16] | 0.78 (0.60 - 1.44) [23] | 0.617        | 0.77 (0.60 - 1.30) [15] | 0.83 (0.59 - 1.89) [8]  | 0.63 | 0.770        | 0.51        | 0.98        |
| Muscularis | <i>CACNB2</i> | 1.00 (0.78 - 1.48) [12] | 0.96 (0.54 - 1.76) [24] | 0.700        | 1.21 (0.52 - 1.86) [14] | 0.92 (0.58 - 1.25) [10] | 0.58 | 0.738        | 1.00        | 0.45        |
|            |               |                         |                         |              |                         |                         |      |              |             |             |
| Mucosa     | <i>BMPR1B</i> | 1.00 (0.78 - 1.02) [7]  | 0.43 (0.26 - 0.65) [14] | <b>0.010</b> | 0.57 (0.26 - 0.71) [8]  | 0.35 (0.27 - 0.46) [6]  | 0.75 | <b>0.032</b> | <b>0.02</b> | <b>0.04</b> |
| Submucosa  | <i>BMPR1B</i> | 1.00 (0.52 - 1.46) [16] | 0.66 (0.45 - 1.28) [23] | 0.353        | 0.79 (0.54 - 1.28) [15] | 0.60 (0.36 - 1.22) [8]  | 0.63 | 0.591        | 0.46        | 0.41        |
| Muscularis | <i>BMPR1B</i> | 1.00 (0.67 - 1.43) [8]  | 0.49 (0.41 - 1.08) [23] | 0.055        | 0.46 (0.40 - 0.97) [13] | 0.69 (0.46 - 1.18) [10] | 0.28 | 0.088        | <b>0.04</b> | 0.23        |

**Supplementary Table 11: Gene set enrichment analysis (GSEA) for GO: Biological Process Ontology using the 48 curated candidate genes for diverticular disease**

The table shows the results of GSEA with gene sets derived from the MSigDB GO Biological Process Ontology (4436 gene sets) according to Subramanian et al., PNAS 2005 (full reference provided below the table). K is the number of genes in the set from The Molecular Signatures Database (MSigDB v6.1). k is the number of genes in the intersection of the query set with a set from MSigDB. \* p-value: hypergeometric distribution (k, K, n, N), Genes in Comparison (n=45 with HUGO gene symbols), Genes in Universe (all known human gene symbols) (N=45956); \*\* q-values significant at FDR (p < 0.05)

| Gene Set Name                                         | # Genes in Gene Set (K) | # Genes in Overlap (k) | k/K    | p-value* | FDR q-value** | Genes in Overlap (diverticular disease risk associated genes )                         |
|-------------------------------------------------------|-------------------------|------------------------|--------|----------|---------------|----------------------------------------------------------------------------------------|
| GO_REGULATION_OF_CELL_DIFFERENTIATION                 | 1492                    | 11                     | 0.0074 | 1.5E-7   | 6.64E-4       | <i>BMPRI1B; TRPS1; GDNF; EFEMP1; HLX; TIMP2; BDNF; P2RY12; HAS2; NOV; S100A10</i>      |
| GO_REGULATION_OF_MULTICELLULAR_ORGANISMAL_DEVELOPMENT | 1672                    | 11                     | 0.0066 | 4.64E-7  | 1.03E-3       | <i>BMPRI1B; TRPS1; GDNF; EFEMP1; HLX; TIMP2; BDNF; P2RY12; PPP1R16B; COLQ; STARD13</i> |
| GO_ORGAN_MORPHOGENESIS                                | 841                     | 8                      | 0.0095 | 1.44E-6  | 2.13E-3       | <i>BMPRI1B; TRPS1; GDNF; EFEMP1; HLX; HAS2; PLEKHA1; ELN;</i>                          |
| GO_REGULATION_OF_CHONDROCYTE_DIFFERENTIATION          | 46                      | 3                      | 0.0652 | 1.29E-5  | 5.46E-3       | <i>BMPRI1B; EFEMP1; TRPS1</i>                                                          |
| GO_SYNAPSE_ORGANIZATION                               | 145                     | 4                      | 0.0276 | 1.28E-5  | 5.46E-3       | <i>GDNF; BDNF; COLQ; CACNB2</i>                                                        |
| GO_EXTRACELLULAR_STRUCTURE_ORGANIZATION               | 304                     | 5                      | 0.0164 | 1.21E-5  | 5.46E-3       | <i>HAS2; ELN; TIMP2; COL6A1; CRISPLD2</i>                                              |
| GO_SKELETAL_SYSTEM_DEVELOPMENT                        | 455                     | 6                      | 0.0132 | 5.35E-6  | 5.46E-3       | <i>BMPRI1B; TRPS1; HAS2; PLEKHA1; NOV; PCSK5</i>                                       |
| GO_TUBE_DEVELOPMENT                                   | 552                     | 6                      | 0.0109 | 1.6E-5   | 5.46E-3       | <i>GDNF; HLX; TRPS1; STARD13; CRISPLD2; PCSK5</i>                                      |

|                                                                          |      |   |        |         |         |                                                                           |
|--------------------------------------------------------------------------|------|---|--------|---------|---------|---------------------------------------------------------------------------|
| GO_POSITIVE_REGULATION_OF_CELL_DIFFERENTIATION                           | 823  | 7 | 0.0085 | 1.45E-5 | 5.46E-3 | <i>BMPR1B; GDNF; HAS2; HLX; BDNF; TIMP2; S100A10</i>                      |
| GO_REGULATION_OF_CELL_DEVELOPMENT                                        | 836  | 7 | 0.0084 | 1.6E-5  | 5.46E-3 | <i>GDNF; HAS2; BDNF; TIMP2; S100A10; EFEMP1; P2RY12</i>                   |
| GO_POSITIVE_REGULATION_OF_DEVELOPMENTAL_PROCESS                          | 1142 | 8 | 0.0070 | 1.35E-5 | 5.46E-3 | <i>BMPR1B; GDNF; BDNF; HAS2; TIMP2; HLX; PPP1R16B; S100A10</i>            |
| GO_REGULATION_OF_CELL_PROLIFERATION                                      | 1496 | 9 | 0.0060 | 1.23E-5 | 5.46E-3 | <i>HAS2; TIMP2; BMPR1B; NOV; GDNF; EFEMP1; HLX; PPP1R16B; PIAS1</i>       |
| GO_TISSUE_DEVELOPMENT                                                    | 1518 | 9 | 0.0059 | 1.38E-5 | 5.46E-3 | <i>BMPR1B; GDNF; HAS2; HLX; PPP1R16B; TRPS1; NOV; COL6A1; STARD13</i>     |
| GO_POSITIVE_REGULATION_OF_CELL_MORPHOGENESIS_INVOLVED_IN_DIFFERENTIATION | 162  | 4 | 0.0247 | 1.98E-5 | 6.28E-3 | <i>GDNF; HAS2; BDNF; S100A10</i>                                          |
| GO_REGULATION_OF_CARTILAGE_DEVELOPMENT                                   | 63   | 3 | 0.0476 | 3.34E-5 | 9.89E-3 | <i>TRPS1; EFEMP1; BMPR1B</i>                                              |
| GO_ENTERIC_NERVOUS_SYSTEM_DEVELOPMENT                                    | 11   | 2 | 0.1818 | 5.13E-5 | 1.4E-2  | <i>GDNF; HLX</i>                                                          |
| GO_REGULATION_OF_ANATOMICAL_STRUCTURE_MORPHOGENESIS                      | 1021 | 7 | 0.0069 | 5.69E-5 | 1.4E-2  | <i>S100A10; GDNF; HAS2; BDNF; STARD13; PPP1R16B; ARHGAP15</i>             |
| GO_PROTEIN_LOCALIZATION                                                  | 1805 | 9 | 0.0050 | 5.37E-5 | 1.4E-2  | <i>TRPS1; S100A10; PCSK5; COLQ; CACNB2; PLEKHA1; SNX24; GPR158; LTBP1</i> |
| GO_POSITIVE_REGULATION_OF_RESPONSE_TO_STIMULUS                           | 1929 | 9 | 0.0047 | 8.95E-5 | 2.09E-2 | <i>BDNF; PLEKHA1; HLX; BMPR1B; TIMP2; NOV; HLA-DQA1; ANO1; EDEM1</i>      |
| GO_POSITIVE_REGULATION_OF_CELL_DEVELOPMENT                               | 472  | 5 | 0.0106 | 9.74E-5 | 2.16E-2 | <i>BDNF; TIMP2; S100A10; GDNF; HAS2</i>                                   |

**Reference for Supplementary Table 11:**

Subramanian A, Tamayo P, Mootha VK, Mukherjee S, Ebert BL, Gillette MA, Paulovich A, Pomeroy SL, Golub TR, Lander ES, Mesirov JP. Gene set enrichment analysis: a knowledge-based approach for interpreting genome-wide expression profiles. *Proc Natl Acad Sci U S A*. 2005 Oct 25;102(43):15545-50.

***Supplementary Table 12: Gene set enrichment analysis (GSEA) for CP: Canonical pathways Ontology using the 48 curated candidate genes for diverticular disease***

The table shows the results of GSEA with gene sets derived from curated gene sets for CP: Canonical pathways (1329 gene sets) according to Subramanian et al., PNAS 2005 (full reference provided below the table). These gene sets are canonical representations of a biological process compiled by domain experts. Table headings match headings in Supplementary Table 11.

| Gene Set Name (Reference)               | # Genes in Gene Set (K) | Description                                                                                                               | # Genes in Overlap (k) | k/K    | FDR q-value** | Genes in Overlap (diverticular disease risk associated genes )                                    |
|-----------------------------------------|-------------------------|---------------------------------------------------------------------------------------------------------------------------|------------------------|--------|---------------|---------------------------------------------------------------------------------------------------|
| NABA_MATRISOME (Naba et al.)            | 1028                    | Ensemble of genes encoding extracellular matrix and extracellular matrix-associated proteins                              | 13                     | 0.0126 | 8.51E-9       | <i>COLQ; LTBP; ELN; EFEMP1; NOV; CRISPLD2; COL6A1; GDNF; BDNF; TIMP2; S100A10; PCSK5; C1QTNF7</i> |
| NABA_CORE_MATRISOME (Naba et al.)       | 275                     | Ensemble of genes encoding core extracellular matrix including ECM glycoproteins, collagens and proteoglycans             | 7                      | 0.0255 | 4.53E-6       | <i>COLQ; LTBP; ELN; EFEMP1; NOV; CRISPLD2; COL6A1</i>                                             |
| NABA_ECM_GLYCOPROTEINS (Naba et al.)    | 196                     | Genes encoding structural ECM glycoproteins                                                                               | 6                      | 0.0306 | 1.32E-5       | <i>COLQ; LTBP; ELN; EFEMP1; NOV; CRISPLD2</i>                                                     |
| NABA_MATRISOME_ASSOCIATED (Naba et al.) | 753                     | Ensemble of genes encoding ECM-associated proteins including ECM-affiliated proteins, ECM regulators and secreted factors | 6                      | 0.0080 | 2.29E-2       | <i>GDNF; BDNF; TIMP2; S100A10; PCSK5; C1QTNF7</i>                                                 |

**Reference for Supplementary Table 12:**



Subramanian A, Tamayo P, Mootha VK, Mukherjee S, Ebert BL, Gillette MA, Paulovich A, Pomeroy SL, Golub TR, Lander ES, Mesirov JP. Gene set enrichment analysis: a knowledge-based approach for interpreting genome-wide expression profiles. *Proc Natl Acad Sci U S A*. 2005 Oct 25;102(43):15545-50.

Naba A, Clauser KR, Hoersch S, Liu H, Carr SA, Hynes RO. The matrisome: in silico definition and in vivo characterization by proteomics of normal and tumor extracellular matrices. *Mol Cell Proteomics*. 2012 Apr;11(4):M111.014647. doi: 10.1074/mcp.M111.014647.

### ***Supplementary Table 13: VEGAS2PathwayAnalysis***

We performed pathway analysis on Diverticular Disease GWAS summary data to assign gene-based test statistics to a pathway using the VEGAS2-Pathway approach (Mirsha et al., 2017). The analysis was performed on 6,212 gene-sets, including 18,399 genes with 511,336 annotations. An empirical p-value for each pathway was computed by comparing the summed set score against that of replicates of the same size obtained through resampling of gene-based test statistics. Supplementary Table 13 shows the top five pathways observed in pathway analysis. Two pathways reached the genome-wide, pathway-based significant p value of  $p < 1.00 \times 10^{-5}$ , which are GO:0045596\_negative\_regulation\_of\_cell\_differentiation and GO:0031012\_extracellular\_matrix, both pathways are highlighted in grey shading. The full analysis is provided in Supplementary Table 14.

| # | Pathway ID                                                              | Pathway size<br>(number of genes ) | Empirical p value      |
|---|-------------------------------------------------------------------------|------------------------------------|------------------------|
| 1 | <a href="#">GO:0045596_negative_regulation_of_cell_differentiation</a>  | 176                                | $4.00 \times 10^{-06}$ |
| 2 | <a href="#">GO:0031012_extracellular_matrix</a>                         | 248                                | $8.00 \times 10^{-06}$ |
| 3 | <a href="#">GO:0051093_negative_regulation_of_developmental_process</a> | 209                                | $1.80 \times 10^{-05}$ |
| 4 | <a href="#">GO:0007517_muscle_organ_development</a>                     | 191                                | $2.06 \times 10^{-04}$ |
| 5 | <a href="#">GO:0045595_regulation_of_cell_differentiation</a>           | 368                                | $2.24 \times 10^{-04}$ |

### ***Literature cited in Supplementary Table 13:***

Mishra A, MacGregor S. A Novel Approach for Pathway Analysis of GWAS Data Highlights Role of BMP Signalling and Muscle Cell Differentiation in Colorectal Cancer Susceptibility. *Twin Res Hum Genet.* 2017;20(1):1-9.

***Supplementary Table 14: VEGAS2 pathway analysis of gene-based test statistics using summary data from the UK Biobank GWAS analysis for diverticular disease.***

Supplementary 14 shows the top 100 results of the VEGAS2 pathway analysis approach (Mishra *et al.*) based on gene-based test statistics of diverticular disease GWAS summary data. All together, the analysis was performed on 6,212 gene-sets, including 18,399 genes with 511,336 annotations. An empirical p value for each pathway was computed by comparing the summed set score against that of replicates of the same size obtained through resampling of gene-based test statistics.

***Reference for Supplementary Table 14:***

Mishra A, MacGregor S. A Novel Approach for Pathway Analysis of GWAS Data Highlights Role of BMP Signaling and Muscle Cell Differentiation in Colorectal Cancer Susceptibility. *Twin Res Hum Genet.* 2017;20(1):1-9.



[illegible]

[illegible]



|    |                                                               |                      |        |     |
|----|---------------------------------------------------------------|----------------------|--------|-----|
|    | PC_Proteoglycan_syndecan-mediated_signaling_events            | 2.788279801350416-4  | 0.0035 | 579 |
| 72 | PC_Serotonin_receptors                                        | 7.90966697953674e-20 | 0.0035 | 117 |
| 74 | GO:0030203_glycosaminoglycan_metabolic_process                | 2.46812379001373e-12 | 0.0035 | 43  |
| 75 | GO:0010717_regulation_of_epithelial_to_mesenchymal_transition | 6.20765172992516e-08 | 0.0035 | 11  |
| 76 | GO:0005518_collagen_binding                                   | 7.65742720684874e-11 | 0.0036 | 31  |
| 77 | GO:0048738_cardiac_muscle_development                         | 1.92747055717248e-12 | 0.0039 | 46  |
| 78 | GO:0005501_ventricular_cardiac_muscle_morphogenesis           | 3.58753563385671e-09 | 0.0039 | 19  |
| 79 | GO:0022607_cellular_component_assembly                        | 2.78771260324077e-50 | 0.0041 | 528 |
| 80 | PANTHER_BIOLOGICAL_PROCESS_Cell_cycle_control                 | 1.11914555385854e-32 | 0.0042 | 286 |
| 81 | GO:0044451_nucleoplasm_part                                   | 1.31812730670233e-42 | 0.0043 | 414 |
| 82 | PC_RhoA_signaling_pathway                                     | 3.21733847959749e-21 | 0.0043 | 146 |
| 83 | PC_G-protein_beta:gamma_signalling                            | 9.41117507039735e-16 | 0.0044 | 81  |
| 84 | PANTHER_BIOLOGICAL_PROCESS_Tumor_suppression                  | 1.56280979446776e-14 | 0.0044 | 67  |



[illegible]

**Supplementary Table 15: GWAS analysis of regulatory and functional information enrichment with LD correction (GARFIELD)**

Functional enrichment analysis of diverticular disease variants in DNaseI Hypersensitive sites from ENCODE and Roadmap Epigenomics data. The table is sorted ascending by the enrichment P value up to a multiple testing adjusted P value threshold of  $P_{adj} < 9.5194e-05$  based on the estimated effective number of enrichment annotations ( $M_{eff} N = 525.24$ ). Fold enrichment of the respective tissue type at GWAS variant significance cutoff of  $p < 1e-08$  is expressed as odds ratio (OR) with lower and upper 95% confidence interval. Celltype specifies the cell type of annotation. Tissue count (%) shows the observed frequency of the respective tissue type at top 20 and total observations.

| TOP | Tissue       | Celltype                            | $P_{enrich}$ | $OR_{enrich}$     | Tissue count<br>(%) Top 20 | Tissue count<br>(%) total | Annotation *.twopass.merge150.wgt10.zgt2.wig               |
|-----|--------------|-------------------------------------|--------------|-------------------|----------------------------|---------------------------|------------------------------------------------------------|
| 1   | brain        | SK-N-SH                             | 1.36e-07     | 6.24 [3.16-12.32] | 1 (5%)                     | 2 (3%)                    | SKNSH-DS8482*                                              |
| 2   | epithelium   | HAEPiC                              | 3.52e-07     | 6.57 [3.19-13.57] | 1 (5%)                     | 2 (3%)                    | HAEPiC-DS12663*                                            |
| 3   | fibroblast   | Fibroblasts_Fetal_Skin_Scalp        | 3.60e-07     | 6.41 [3.13-13.11] | <b>5 (25%)</b>             | <b>13 (22%)</b>           | UW.Fibroblasts_Fetal_Skin_Scalp.CA.H-24259.DS19444*        |
| 4   | gingival     | AG09319                             | 3.90e-07     | 6.17 [3.05-12.46] | 1 (5%)                     | 1 (2%)                    | AG09319-DS12291*                                           |
| 5   | skin         | AG10803                             | 7.43e-07     | 5.94 [2.93-12.03] | 1 (5%)                     | 4 (7%)                    | AG10803-DS12384*                                           |
| 6   | lung         | HPF                                 | 1.15e-06     | 5.75 [2.84-11.64] | 1 (5%)                     | 2 (3%)                    | HPF-DS13390*                                               |
| 7   | fibroblast   | Fibroblasts_Fetal_Skin_Biceps_Right | 1.46e-06     | 5.78 [2.83-11.81] |                            |                           | UW.Fibroblasts_Fetal_Skin_Biceps_Right.CA.H-24259.DS19761* |
| 8   | fibroblast   | Fibroblasts_Fetal_Skin_Back         | 1.88e-06     | 5.58 [2.75-11.33] |                            |                           | UW.Fibroblasts_Fetal_Skin_Back.CA.H-24218.DS19233*         |
| 9   | blood_vessel | AoSMC                               | 1.90e-06     | 5.97 [2.86-12.46] | 2 (10%)                    | 3 (5%)                    | wgEncodeOpenChromDnaseAosmcSerumfreeAlnAllReps.30000000*   |
| 10  | fetal_muscle | Fetal_Muscle_Back                   | 2.01e-06     | 6.01 [2.87-12.60] | 2 (10%)                    | 6 (10%)                   | UW.Fetal_Muscle_Back.CA.H-24218.DS19117*                   |
| 11  | blood_vessel | AoAF                                | 3.02e-06     | 5.36 [2.65-10.84] |                            |                           | AoAF-DS13523*                                              |
| 12  | fetal_muscle | Fetal_Muscle_Arm                    | 3.22e-06     | 5.96 [2.81-12.65] |                            |                           | UW.Fetal_Muscle_Arm.CA.H-24218.DS19053*                    |
| 13  | connective   | HVMF                                | 3.97e-06     | 5.25 [2.60-10.62] | 1 (5%)                     | 1 (2%)                    | HVMF-DS13981*                                              |

|    |                    |                                         |          |                   |         |         |                                                                |
|----|--------------------|-----------------------------------------|----------|-------------------|---------|---------|----------------------------------------------------------------|
| 14 | fibroblast         | Fibroblasts_Fetal_Skin_Biceps_Left      | 4.07e-06 | 5.29 [2.60-10.74] |         |         | UW.Fibroblasts_Fetal_Skin_Biceps_Left.CA.H-24259.DS19867*      |
| 15 | embryonic_lung     | WI-38                                   | 4.16e-06 | 5.14 [2.56-10.33] | 1 (5%)  | 1 (2%)  | WI_38-DS14315*                                                 |
| 16 | es_cell            | H1_Derived_Mesenchymal_Stem_Cells       | 4.43e-06 | 5.17 [2.56-10.42] | 2 (10%) | 2 (3%)  | UW.H1_Derived_Mesenchymal_Stem_Cells.CA.DS20671*               |
| 17 | es_cell            | H1_Derived_Mesenchymal_Stem_Cells       | 5.59e-06 | 5.12 [2.53-10.37] |         |         | UW.H1_Derived_Mesenchymal_Stem_Cells.CA.DS21042*               |
| 18 | fetal_stomach      | Fetal_Stomach                           | 6.19e-06 | 5.30 [2.57-10.92] | 1 (5%)  | 4 (7%)  | UW.Fetal_Stomach.CA.H-23589.DS16530*                           |
| 19 | breast             | HMF                                     | 6.49e-06 | 4.99 [2.48-10.04] | 1 (5%)  | 2 (3%)  | HMF-DS13363*                                                   |
| 20 | fibroblast         | Fibroblasts_Fetal_Skin_Biceps_Right     | 7.64e-06 | 4.93 [2.45-9.93]  |         |         | UW.Fibroblasts_Fetal_Skin_Biceps_Right.CA.H-24259.DS19745*     |
| 21 | fibroblast         | Fibroblasts_Fetal_Skin_Scalp            | 8.75e-06 | 4.86 [2.42-9.74]  |         |         | UW.Fibroblasts_Fetal_Skin_Scalp.CA.H-24259.DS19449*            |
| 22 | fetal_muscle       | Fetal_Muscle_Back                       | 9.78e-06 | 5.48 [2.58-11.65] |         |         | UW.Fetal_Muscle_Back.CA.H-24297.DS19648*                       |
| 23 | brain              | BE2_C                                   | 1.07e-05 | 4.78 [2.38-9.58]  |         |         | BE_2_C-DS14625*                                                |
| 24 | muscle             | SKMC                                    | 1.09e-05 | 4.87 [2.41-9.87]  |         | 1 (2%)  | SkMC-DS11949*                                                  |
| 25 | fetal_lung         | Fetal_Lung_Right                        | 1.41e-05 | 5.20 [2.47-10.94] |         | 6 (10%) | UW.Fetal_Lung_Right.CA.H-23604.DS16566*                        |
| 26 | fetal_lung         | Fetal_Lung                              | 1.41e-05 | 4.92 [2.40-10.10] |         |         | UW.Fetal_Lung.CA.H-23365.DS15227*                              |
| 27 | blood              | Mobilized_CD34_Primary_Cells            | 1.41e-05 | 4.65 [2.32-9.31]  |         | 2 (3%)  | UW.Mobilized_CD34_Primary_Cells.CA.RO_01492.DS14206*           |
| 28 | foreskin           | HFF-Myc                                 | 1.49e-05 | 4.96 [2.40-10.24] |         | 2 (3%)  | HFF_MyC-DS15079*                                               |
| 29 | fibroblast         | Fibroblasts_Fetal_Skin_Quadriceps_Right | 1.55e-05 | 4.67 [2.32-9.38]  |         |         | UW.Fibroblasts_Fetal_Skin_Quadriceps_Right.CA.H-24259.DS19943* |
| 30 | fetal_renal_pelvis | Fetal_Renal_Pelvis                      | 1.61e-05 | 4.55 [2.29-9.05]  |         | 1 (2%)  | UW.Fetal_Renal_Pelvis.CA.H-24005.DS18088*                      |
| 31 | breast             | Breast_vHMEC                            | 1.76e-05 | 4.75 [2.33-9.67]  |         |         | UW.Breast_vHMEC.CA.RM035.DS18406*                              |
| 32 | heart              | HCM                                     | 1.81e-05 | 4.64 [2.30-9.37]  |         | 2 (3%)  | HCM-DS12599*                                                   |
| 33 | fetal_lung         | Fetal_Lung                              | 1.93e-05 | 4.93 [2.37-10.25] |         |         | UW.Fetal_Lung.CA.H-23266.DS14751*                              |
| 34 | brain_hippocampus  | HA-h                                    | 2.17e-05 | 4.94 [2.36-10.34] |         | 1 (2%)  | HAh-DS15192*                                                   |
| 35 | fetal_lung         | Fetal_Lung_Right                        | 2.22e-05 | 4.89 [2.35-10.17] |         |         | UW.Fetal_Lung_Right.CA.H-24005.DS17954*                        |
| 36 | fetal_muscle       | Fetal_Muscle_Back                       | 2.61e-05 | 4.83 [2.32-10.06] |         |         | UW.Fetal_Muscle_Back.CA.H-24111.DS18468*                       |
| 37 | skin               | BJ                                      | 2.61e-05 | 4.43 [2.21-8.86]  |         |         | BJ-DS10081*                                                    |
| 38 | skin               | AG09309                                 | 2.64e-05 | 4.49 [2.23-9.06]  |         |         | AG09309-DS12352*                                               |
| 39 | fibroblast         | Fibroblasts_Fetal_Skin_Biceps_Left      | 2.76e-05 | 4.50 [2.23-9.08]  |         |         | UW.Fibroblasts_Fetal_Skin_Biceps_Left.CA.H-24259.DS19857*      |

|    |                    |                                         |          |                  |  |        |                                                               |
|----|--------------------|-----------------------------------------|----------|------------------|--|--------|---------------------------------------------------------------|
| 40 | fibroblast         | Fibroblasts_Fetal_Skin_Upper_Back       | 2.76e-05 | 4.48 [2.22-9.03] |  |        | UW.Fibroblasts_Fetal_Skin_Upper_Back.CA.H-24259.DS19696*      |
| 41 | fibroblast         | Fibroblasts_Fetal_Skin_Upper_Back       | 2.94e-05 | 4.51 [2.22-9.14] |  |        | UW.Fibroblasts_Fetal_Skin_Upper_Back.CA.H-24259.DS19706*      |
| 42 | blood              | Mobilized_CD4_Primary_Cells             | 3.67e-05 | 4.28 [2.15-8.54] |  |        | UW.Mobilized_CD4_Primary_Cells.CA.RO_01701.DS17175*           |
| 43 | fetal_lung         | Fetal_Lung_Left                         | 3.75e-05 | 4.74 [2.26-9.92] |  |        | UW.Fetal_Lung_Left.CA.H-24089.DS18421*                        |
| 44 | fibroblast         | Penis_Foreskin_Fibroblast_Primary_Cells | 3.91e-05 | 4.33 [2.15-8.70] |  |        | UW.Penis_Foreskin_Fibroblast_Primary_Cells.CA.skin02.DS18252* |
| 45 | fetal_lung         | Fetal_Lung_Left                         | 4.59e-05 | 4.28 [2.13-8.61] |  |        | UW.Fetal_Lung_Left.CA.H-23887.DS17674*                        |
| 46 | heart              | HCFAa                                   | 4.68e-05 | 4.37 [2.15-8.89] |  |        | HCFAa-DS13480*                                                |
| 47 | skin               | NHDF-Ad                                 | 4.75e-05 | 4.32 [2.13-8.75] |  |        | NHDF_Ad-DS12863*                                              |
| 48 | blood_vessel       | HPAF                                    | 4.88e-05 | 4.23 [2.11-8.48] |  |        | HPAF-DS13411*                                                 |
| 49 | fetal_muscle_trunk | Fetal_Muscle_Trunk                      | 5.69e-05 | 4.31 [2.11-8.76] |  | 1 (2%) | UW.Fetal_Muscle_Trunk.CA.H-24507.DS20544*                     |
| 50 | foreskin           | HFF                                     | 5.71e-05 | 4.23 [2.09-8.53] |  |        | HFF-DS15115*                                                  |
| 51 | fetal_muscle       | Fetal_Muscle_Leg                        | 5.96e-05 | 4.39 [2.13-9.04] |  |        | UW.Fetal_Muscle_Leg.CA.H-24089.DS18456*                       |
| 52 | fetal_stomach      | Fetal_Stomach                           | 6.13e-05 | 4.07 [2.05-8.10] |  |        | UW.Fetal_Stomach.CA.H-23769.DS17325*                          |
| 53 | colon              | Caco-2                                  | 6.23e-05 | 3.88 [2.00-7.53] |  | 1 (2%) | CACO2-DS8235*                                                 |
| 54 | fetal_stomach      | Fetal_Stomach                           | 6.42e-05 | 4.26 [2.09-8.66] |  |        | UW.Fetal_Stomach.CA.H-24005.DS17963*                          |
| 55 | fetal_muscle       | Fetal_Muscle_Arm                        | 6.43e-05 | 4.20 [2.08-8.49] |  |        | UW.Fetal_Muscle_Arm.CA.H-24297.DS19646*                       |
| 56 | fibroblast         | Fibroblasts_Fetal_Skin_Abdomen          | 6.44e-05 | 4.14 [2.06-8.32] |  |        | UW.Fibroblasts_Fetal_Skin_Abdomen.CA.H-24259.DS19561*         |
| 57 | fetal_stomach      | Fetal_Stomach                           | 7.16e-05 | 4.26 [2.08-8.71] |  |        | UW.Fetal_Stomach.CA.H-24401.DS20349*                          |
| 58 | epithelium         | HPdLF                                   | 9.00e-05 | 4.01 [2.00-8.05] |  |        | HPdLF-DS13573*                                                |
| 59 | lung               | IMR90                                   | 9.02e-05 | 4.00 [2.00-8.00] |  |        | UW.IMR90.CA.DS13229*                                          |
| 60 | fibroblast         | Fibroblasts_Fetal_Skin_Quadriceps_Left  | 9.27e-05 | 4.02 [2.00-8.09] |  |        | UW.Fibroblasts_Fetal_Skin_Quadriceps_Left.CA.H-24259.DS20046* |

## SUPPLEMENTARY TABLES

***Supplementary Table 16: Overview of the study populations included in risk differentiation of diverticulitis versus diverticulosis***

The following European sample collections were utilized for the subphenotype analysis comparing uncomplicated diverticulosis and diverticulitis. All quantitative measures are shown as medians with interquartile ranges provided in brackets. Body mass index (BMI) and age at the time point of inclusion in the study are included. Patients diagnosed with colorectal cancer, ulcerative colitis or Crohn's disease were excluded from analyses.

| Variable        | Germany (North)<br>(n=1411) |                   | Germany (West)<br>(n=227) |                   | Austria (Vienna)<br>(n=419) |                   | Austria (Oberndorf)<br>(n=387) |                   | Lithuania<br>(n=479) |                   |
|-----------------|-----------------------------|-------------------|---------------------------|-------------------|-----------------------------|-------------------|--------------------------------|-------------------|----------------------|-------------------|
|                 | D-itis<br>(n=728)           | D-osis<br>(n=683) | D-itis<br>(n=86)          | D-osis<br>(n=141) | D-itis<br>(n=212)           | D-osis<br>(n=207) | D-itis<br>(n=98)               | D-osis<br>(n=289) | D-itis<br>(n=43)     | D-osis<br>(n=436) |
| Gender (% male) | 45                          | 57                | 84                        | 140               | 55.2                        | 58.0              | 58.2                           | 57.1              | 41.9                 | 43.1              |
| Age (years )    | 64 (56-72)                  | 72 (65-77)        | 64 (54-72)                | 68 (62-77)        | 65 (56-72)                  | 71 (65-76)        | 61 (51-69)                     | 66 (59-73)        | 63 (57-72)           | 68 (62-74)        |
| BMI             | 27.0 (24.6-30.0)            | 26.7 (24.4-29.9)  | 27.2 (23.9-30.1)          | 26.8 (24.2-31.0)  | 28.4 (26.1-32.6)            | 27.4 (25.5-30.4)  | 28.0(23.0-32.9)                | 26.1(21.7-30.5)   | 27.2 (25.6-31.6)     | 28.7 (26.1-32.3)  |

**Supplementary Table 17: Results of comparison of diverticulitis versus diverticulosis risk**

The relative genetic effect of the 27 replicating loci on diverticulitis versus diverticulosis risk was assessed in European cohorts (Supplementary Table 1). Reference allele frequencies for diverticulitis and diverticulosis are shown for the largest (n=1411) differentiation cohort. Loci are ordered by odds ratio obtained from the metanalysis of the European cohorts. To harmonize the directionality of diverticulitis risk increment for all 27 loci, the OR in Figure 1(B) is based on the reference allele (Ref) in Supplementary Table 17. The reference allele was chosen as the risk increasing allele - the allele observed more common in diverticular disease cases as compared to diverticula-free controls.

| Chr | Position  | rsID         | Gene(s)           | European cohorts |                  |                     | Germany (Northern Germany) cohort |                                          |                                      |
|-----|-----------|--------------|-------------------|------------------|------------------|---------------------|-----------------------------------|------------------------------------------|--------------------------------------|
|     |           |              |                   | P value          | OR [CI 95%] **   | OR-comparison       | Ref                               | Ref (%)<br>Diverticulitis<br>(n=728) *** | Ref (%)<br>Diverticulosis<br>(n=683) |
| 15  | 40649609  | rs71472433   | <i>PHGR1/ISP2</i> | <b>0.001</b>     | 1.32 [1.12-1.56] | <b>ITIS&gt;OSIS</b> | C                                 | 18.7                                     | 14.4                                 |
| 7   | 73427600  | rs112609918* | <i>ELN</i>        | 0.225            | 1.23 [0.88-1.72] | <b>ITIS&gt;OSIS</b> | T                                 | 3.9                                      | 2.8                                  |
| 13  | 108215404 | rs9555371    | <i>FAM155A 2</i>  | <b>0.015</b>     | 1.21 [1.04-1.42] | <b>ITIS&gt;OSIS</b> | A                                 | 83.9                                     | 81.5                                 |
| 11  | 15014179  | rs12293178*  | <i>CALCB</i>      | <b>0.014</b>     | 1.17 [1.03-1.33] | <b>ITIS&gt;OSIS</b> | A                                 | 33.4                                     | 28.2                                 |
| 1   | 151970629 | rs61814883   | <i>SI00A10</i>    | <b>0.016</b>     | 1.17 [1.03-1.33] | <b>ITIS&gt;OSIS</b> | G                                 | 73.8                                     | 68.4                                 |
| 13  | 107902770 | rs9520344*   | <i>FAM155A 1</i>  | 0.058            | 1.14 [1.00-1.31] | <b>ITIS&gt;OSIS</b> | T                                 | 78.5                                     | 75.0                                 |
| 15  | 68238462  | rs387505     | <i>PIASI</i>      | 0.054            | 1.12 [1.00-1.26] | <b>ITIS&gt;OSIS</b> | T                                 | 46.9                                     | 45.4                                 |
| 2   | 144314247 | rs6734367    | <i>ARHGAP15</i>   | 0.160            | 1.11 [0.96-1.29] | ITIS±OSIS           | T                                 | 20.9                                     | 18.5                                 |
| 10  | 18440444  | rs1888693    | <i>CACNB2</i>     | 0.116            | 1.10 [0.98-1.25] | ITIS±OSIS           | G                                 | 68.7                                     | 65.1                                 |
| 11  | 70007484  | rs2276068*   | <i>ANO1</i>       | 0.140            | 1.09 [0.97-1.23] | ITIS±OSIS           | C                                 | 49.7                                     | 46.6                                 |
| 16  | 86233413  | rs2280028    | <i>LINC01082</i>  | 0.575            | 1.05 [0.88-1.25] | ITIS±OSIS           | G                                 | 86.5                                     | 86.0                                 |
| 3   | 5846159   | rs4684509*   | <i>EDEMI</i>      | 0.543            | 1.05 [0.91-1.21] | ITIS±OSIS           | C                                 | 80.7                                     | 78.5                                 |

|    |           |             |                     |       |                  |           |   |      |      |
|----|-----------|-------------|---------------------|-------|------------------|-----------|---|------|------|
| 1  | 221066373 | rs2784255   | <i>HLX</i>          | 0.518 | 1.04 [0.93-1.17] | ITIS±OSIS | C | 53.2 | 52.9 |
| 6  | 98365289  | rs4839715*  | <i>LOC101927314</i> | 0.575 | 1.04 [0.92-1.17] | ITIS±OSIS | G | 67.1 | 66.6 |
| 10 | 25811435  | rs7086249*  | <i>GPR158</i>       | 0.584 | 1.03 [0.92-1.16] | ITIS±OSIS | T | 58.2 | 56.8 |
| 15 | 76840832  | rs12443137* | <i>SCAPER</i>       | 0.739 | 1.02 [0.91-1.15] | ITIS±OSIS | T | 55.9 | 55.6 |
| 7  | 102447056 | rs10257317* | <i>FBXL13</i>       | 0.745 | 1.02 [0.91-1.15] | ITIS±OSIS | C | 36.8 | 35.2 |
| 3  | 151074941 | rs3732760   | <i>P2RY12</i>       | 0.804 | 1.02 [0.90-1.15] | ITIS±OSIS | C | 39.9 | 36.7 |
| 18 | 20011920  | rs2009593*  | <i>CTAGE1</i>       | 0.835 | 1.01 [0.89-1.15] | ITIS±OSIS | G | 31.0 | 28.7 |
| 8  | 120427648 | rs1381335*  | <i>NOV</i>          | 0.992 | 1.00 [0.86-1.16] | ITIS±OSIS | C | 80.2 | 79.2 |
| 22 | 40679362  | rs5995842*  | <i>TNRC6B</i>       | 0.997 | 1.00 [0.89-1.13] | ITIS±OSIS | G | 38.7 | 39.2 |
| 9  | 136137065 | rs687621*   | <i>ABO</i>          | 0.957 | 1.00 [0.88-1.13] | ITIS±OSIS | A | 64.8 | 64.7 |
| 19 | 38743962  | rs12976534* | <i>PPP1R14A</i>     | 0.714 | 0.98 [0.87-1.10] | ITIS±OSIS | G | 49.5 | 50.4 |
| 4  | 95832551  | rs972409*   | <i>BMPRI1B</i>      | 0.434 | 0.95 [0.84-1.08] | ITIS±OSIS | T | 33.2 | 34.6 |
| 4  | 15384544  | rs4515160*  | <i>CIQTNF7</i>      | 0.166 | 0.91 [0.80-1.04] | ITIS±OSIS | G | 28.3 | 29.8 |
| 3  | 15502681  | rs7609897   | <i>COLQ</i>         | 0.198 | 0.91 [0.79-1.05] | ITIS±OSIS | T | 79.3 | 80.3 |
| 21 | 47398647  | rs7281388*  | <i>COL6A1</i>       | 0.186 | 0.89 [0.76-1.06] | ITIS±OSIS | A | 13.8 | 15.8 |

\* proxy SNP for GWAs lead SNP; \*\* OR adjusted for gender and age; \*\*\*allele frequency of risk increasing allele (Ref Allele) in German differentiation cohort (North)

**Supplementary Table 18: Genetic overlap with Mendelian diseases (OMIM- Online Mendelian Inheritance in Man)**

Direct overlap of the curated candidate genes at diverticular disease associated risk loci with genes causal for monogenic Mendelian diseases. \*Phenotype MIM number from OMIM. \*\*Inheritance AR autosomal recessive, AD autosomal dominant.

| Genomic risk locus | plausible candidate gene at locus | OMIM gene.map search (genomic region, hg38) | Genomic coordinates (From NCBI/GRCh38) | Gene/Locus MIM number | Gene/Locus (OMIM)                      | Phenotype MIM number* | Phenotype                                               | Inheritance** |
|--------------------|-----------------------------------|---------------------------------------------|----------------------------------------|-----------------------|----------------------------------------|-----------------------|---------------------------------------------------------|---------------|
| 4                  | <i>COLQ</i>                       | chr1:14961174-15961174                      | 3:15450132-15521750                    | 603033                | <i>COLQ, EAD, CMS5</i>                 | 603034                | Myasthenic syndrome, congenital, 5                      | AR            |
| 5                  | <i>EFEMP1</i>                     | chr2:55366068-56366069                      | 2:55865961-55924162                    | 601548                | <i>EFEMP1, FBNL, DHRD</i>              | 126600                | Doyle honeycomb degeneration of retina                  | AD            |
| 15                 | <i>COL6A1</i>                     | chr21:45479539-46479540                     | 21:45981748-46005048                   | 120220                | <i>COL6A1, BTHLM1, UCHMD1</i>          | 158810                | Bethlem myopathy 1                                      | AR; AD        |
| 15                 | <i>COL6A1</i>                     | chr21:45479539-46479540                     | 21:45981748-46005048                   | 120220                | <i>COL6A1, BTHLM1, UCHMD1</i>          | 254090                | Ullrich congenital muscular dystrophy 1                 | AR; AD        |
| 16                 | <i>ELN</i>                        | chr7:73513270-74513270                      | 7:74027771-74069906                    | 130160                | <i>ELN, SVAS, ADCLI</i>                | 185500                | Supravalvar aortic stenosis                             | AD            |
| 16                 | <i>ELN</i>                        | chr7:73513270-74513270                      | 7:74027771-74069906                    | 130160                | <i>ELN, SVAS, ADCLI</i>                | 123700                | Cutis laxa, AD                                          | AD            |
| 20                 | <i>P2RY12</i>                     | chr3:150857154-151857153                    | 3:151336842-151384811                  | 600515                | <i>P2RY12, P2Y12, BDPLT8</i>           | 609821                | Bleeding disorder, platelet-type, 8                     | AR            |
| 21                 | <i>CWC27</i>                      | chr5:64499536-65499536                      | 5:64768917-65018762                    | 617170                | <i>CWC27, SDCCAG10, RPSKA</i>          | 250410                | Retinitis pigmentosa with or without skeletal anomalies | AR            |
| 24                 | <i>GDNF</i>                       | chr5:37272678-38272678                      | 5:37812676-37840043                    | 600837                | <i>GDNF, HSCR3</i>                     | 613711                | Hirschsprung disease, susceptibility to, 3              | AD            |
| 24                 | <i>GDNF</i>                       | chr5:37272678-38272678                      | 5:37812676-37840043                    | 600837                | <i>GDNF, HSCR3</i>                     | 209880                | Central hypoventilation syndrome                        | AD            |
| 28                 | <i>SEMI</i>                       | chr7:95949252-96949252                      | 7:91500000-98400000                    | 183600                | <i>SEMI, SHFD1, SHSF1</i>              | 183600                | Split hand/foot malformation 1                          | AD            |
| 30                 | <i>UBTF</i>                       | chr17:43735410-44735410                     | 17:44205032-44221625                   | 600673                | <i>UBTF, UBF, CONDBA</i>               | 617672                | Neurodegeneration, childhood-onset, with brain atrophy  | AD            |
| 31                 | <i>CACNB2</i>                     | chr10:17651515-18651515                     | 10:18140559-18545880                   | 600003                | <i>CACNB2</i>                          | 611876                | Brugada syndrome 4                                      | AD            |
| 32                 | <i>BMPR1B</i>                     | chr4:94400268-95400268                      | 4:94757976-95158452                    | 603248                | <i>BMPR1B, ALK6, AMDD, BDA2, BDA1D</i> | 112600                | Brachydactyly, type A2                                  | AD            |
| 32                 | <i>BMPR1B</i>                     | chr4:94400268-95400268                      | 4:94757976-95158452                    | 603248                | <i>BMPR1B, ALK6, AMDD, BDA2, BDA1D</i> | 616849                | Brachydactyly, type A1, D                               | AD            |
| 32                 | <i>BMPR1B</i>                     | chr4:94400268-95400268                      | 4:94757976-95158452                    | 603248                | <i>BMPR1B, ALK6, AMDD, BDA2, BDA1D</i> | 609441                | Acromesomelic dysplasia, Demirhan type                  | AR            |
| 51                 | <i>TRPS1</i>                      | chr8:115076317-116076321                    | 8:115408495-115669636                  | 604386                | <i>TRPS1</i>                           | 190351                | Trichorhinophalangeal syndrome, type III                | AD            |
| 51                 | <i>TRPS1</i>                      | chr8:115076317-116076321                    | 8:115408495-115669636                  | 604386                | <i>TRPS1</i>                           | 190350                | Trichorhinophalangeal syndrome, type I                  | AD            |



**Supplementary Table 19: Genetic overlap with Mendelian diseases (OMIM- Online Mendelian Inheritance in Man) - 500 kilo-base (kb) window**

Genetic overlap of diverticular disease associated genomic risk loci with genes causal for monogenic Mendelian diseases. Genes with a transcript start within 500kb on either side of the respective lead variant at genomic risk locus are considered. A direct overlap of the curated candidate gene at genomic risk locus with OMIM annotated genes is highlighted in bold print (OMIM overlap with candidate gene). \*Phenotype MIM number from OMIM. \*\*Inheritance AR autosomal recessive, AD autosomal dominant. The table was assembled as follows: Diverticular disease risk loci with consistency in odds ratio direction between discovery and replication cohorts (n=48, Table 2,3) were analysed for overlap with autosomal dominant and autosomal recessive inherited Mendelian diseases cataloged in OMIM. For this analysis we converted the genomic locations of diverticular disease-associated lead variants from hg19 (GRCh37) to the hg38 (GRCh38) human genome build using the software liftOver which is integrated in the UCSC genome browser. Next we retrieved the gene annotations (July 15, 2018) that lie within a 500 kilo-base (kb) window on either side of the lead variant from OMIM by using "Advanced Search" (gene <https://www.omim.org/search/advanced/geneMap>). Overlapping phenotypes and associated genes are listed.

| Genomic risk locus | curated candidate gene at locus | OMIM gene.map search (genomic region, hg38) | OMIM overlap with candidate gene | Cytogenetic location | Genomic coordinates (From NCBI/GRCh38) | Gene/Locus MIM number | Gene/Locus                    | Phenotype MIM number* | Phenotype                                                                          | Inheritance ** |
|--------------------|---------------------------------|---------------------------------------------|----------------------------------|----------------------|----------------------------------------|-----------------------|-------------------------------|-----------------------|------------------------------------------------------------------------------------|----------------|
| 1                  | <i>ARHGAP15</i>                 | chr2:143056678-144056680                    |                                  | 2p12-q22             | 2:74800000-147900000                   | 139900                | <i>HSR</i>                    | 139900                | Handedness                                                                         | AD             |
| 1                  | <i>ARHGAP15</i>                 | chr2:143056678-144056680                    |                                  | 2q                   | 2:93900000-242193529                   | 606053                | <i>AUTS5</i>                  | 606053                | Autism susceptibility 5                                                            | AR; AD         |
|                    |                                 |                                             |                                  |                      |                                        |                       |                               |                       |                                                                                    |                |
| 2                  | <i>SLC35F3</i>                  | chr1:233717153-234717152                    |                                  | 1q31-q42             | 1:185800000-236400000                  | 145260                | <i>PHA2A, PHA2</i>            | 145260                | Pseudohypoaldosteronism, type IIA                                                  | AD             |
| 2                  | <i>SLC35F3</i>                  | chr1:233717153-234717152                    |                                  | 1q41-q44             | 1:214400000-248956422                  | 615589                | <i>OTSC10</i>                 | 615589                | Otosclerosis 10                                                                    | AD             |
| 2                  | <i>SLC35F3</i>                  | chr1:233717153-234717152                    |                                  | 1q42                 | 1:223900000-236400000                  | 606554                | <i>EA3</i>                    | 606554                | Episodic ataxia, type 3                                                            | AD             |
| 2                  | <i>SLC35F3</i>                  | chr1:233717153-234717152                    |                                  | 1q42                 | 1:223900000-236400000                  | 604801                | <i>MDC1B</i>                  | 604801                | Muscular dystrophy, congenital, 1B                                                 | AR             |
| 2                  | <i>SLC35F3</i>                  | chr1:233717153-234717152                    |                                  | 1q42.2-q43           | 1:230500000-243500000                  | 602759                | <i>PCAP</i>                   | 176807                | Prostate cancer, susceptibility to                                                 | AD             |
| 2                  | <i>SLC35F3</i>                  | chr1:233717153-234717152                    |                                  | 1q42.2-q43           | 1:230500000-243500000                  | 119100                | <i>SHFL1, SHFLD</i>           | 119100                | Split-hand/foot malformation with long bone deficiency 1                           | AD             |
| 2                  | <i>SLC35F3</i>                  | chr1:233717153-234717152                    |                                  | 1q42.2               | 1:234373436-234384048                  | 614772                | <i>COA6, CEMCOX4, C1orf31</i> | 616501                | Cardioencephalomyopathy, fatal infantile, due to cytochrome c oxidase deficiency 4 | AR             |
| 2                  | <i>SLC35F3</i>                  | chr1:233717153-234717152                    |                                  | 1q42.3               | 1:234604268-234609524                  | 615332                | <i>IRF2BP2, CIVD14</i>        | 617765                | Immunodeficiency, common variable, 14                                              | AD             |
| 2                  | <i>SLC35F3</i>                  | chr1:233717153-234717152                    |                                  | Chr.1                |                                        | 108420                | <i>SPGF2, ASG</i>             | 108420                | Spermatogenic failure 2                                                            | AD             |

|   |                 |                         |     |               |                      |        |                                                          |        |                                                  |    |
|---|-----------------|-------------------------|-----|---------------|----------------------|--------|----------------------------------------------------------|--------|--------------------------------------------------|----|
|   |                 |                         |     |               |                      |        |                                                          |        |                                                  |    |
| 3 | <i>GPR158</i>   | chr10:25030299-26030299 |     | 10p12.1       | 10:25934072-26212535 | 606808 | <i>MYO3A, DFNB30</i>                                     | 607101 | Deafness, autosomal recessive 30                 | AR |
|   |                 |                         |     |               |                      |        |                                                          |        |                                                  |    |
| 4 | <i>COLQ</i>     | chr3:14961174-15961174  | yes | 3p25.1        | 3:15450132-15521750  | 603033 | <i>COLQ, EAD, CMS5</i>                                   | 603034 | Myasthenic syndrome, congenital, 5               | AR |
| 4 | <i>COLQ</i>     | chr3:14961174-15961174  |     | 3pter-p25     |                      | 613792 | <i>DEL3pterp25, C3DELpterp25</i>                         | 613792 | 3p- syndrome                                     | AD |
| 4 | <i>COLQ</i>     | chr3:14961174-15961174  |     | 3p26-p24.2    |                      | 252350 | <i>MYMY1, MYMY</i>                                       | 252350 | Moyamoya disease                                 | AR |
| 4 | <i>COLQ</i>     | chr3:14961174-15961174  |     | 3p25.1-p23    | 3:13200000-32000000  | 613530 | <i>LGMD1H</i>                                            | 613530 | Muscular dystrophy, limb-girdle, type 1H         | AD |
| 4 | <i>COLQ</i>     | chr3:14961174-15961174  |     | 3p25.1        | 3:15601351-15653710  | 609019 | <i>BTB</i>                                               | 253260 | Biotinidase deficiency                           | AR |
|   |                 |                         |     |               |                      |        |                                                          |        |                                                  |    |
| 5 | <i>EFEMP1</i>   | chr2:55366068-56366069  | yes | 2p16.1        | 2:55865961-55924162  | 601548 | <i>EFEMP1, FBNL, DHRD</i>                                | 126600 | Doyne honeycomb degeneration of retina           | AD |
| 5 | <i>EFEMP1</i>   | chr2:55366068-56366069  |     | 2p25-p12      |                      | 101850 | <i>PPKP3</i>                                             | 101850 | Keratoderma, palmoplantar, punctate type 3       | AD |
| 5 | <i>EFEMP1</i>   | chr2:55366068-56366069  |     | 2p21-p12      | 2:41500000-83100000  | 615654 | <i>DFNA58</i>                                            | 615654 | Deafness, AD 58                                  | AD |
| 5 | <i>EFEMP1</i>   | chr2:55366068-56366069  |     | 2p21-p13      | 2:41500000-74800000  | 608703 | <i>SCA25</i>                                             | 608703 | Spinocerebellar ataxia 25                        | AD |
| 5 | <i>EFEMP1</i>   | chr2:55366068-56366069  |     | 2p16.1        | 2:54700000-61000000  | 142335 | <i>HBQTL5</i>                                            | 142335 | Fetal hemoglobin QTL5                            | AD |
| 5 | <i>EFEMP1</i>   | chr2:55366068-56366069  |     | 2p16.1        | 2:55287816-55419920  | 609736 | <i>CCDC88A, KIAA1212, HKRP1, GIRDIN, APE, GIV, PEHOL</i> | 617507 | PEHO syndrome-like                               | AR |
| 5 | <i>EFEMP1</i>   | chr2:55366068-56366069  |     | 2p16.1        | 2:55634062-55693909  | 610316 | <i>PNPT1, OLD35, COXPD13, DFNB70</i>                     | 614934 | Deafness, autosomal recessive 70                 | AR |
| 5 | <i>EFEMP1</i>   | chr2:55366068-56366069  |     | 2p16.1        | 2:55634062-55693909  | 610316 | <i>PNPT1, OLD35, COXPD13, DFNB70</i>                     | 614932 | Combined oxidative phosphorylation deficiency 13 | AR |
|   |                 |                         |     |               |                      |        |                                                          |        |                                                  |    |
| 6 | <i>BDNF</i>     | chr11:27226946-28226946 |     | 11p15-p14     |                      | 606528 | <i>DEL11p15p14, C11DELp15p14</i>                         | 606528 | Chromosome 11p15-p14 deletion syndrome           | AR |
| 6 | <i>BDNF</i>     | chr11:27226946-28226946 |     | 11p           |                      | 600165 | <i>NNO1</i>                                              | 600165 | Nanophthalmos-1                                  | AD |
| 6 | <i>BDNF</i>     | chr11:27226946-28226946 |     | 11p14.2-q12.3 | 11:26200000-63600000 | 612642 | <i>DFNA59</i>                                            | 612642 | Deafness, AD 59                                  | AD |
| 6 | <i>BDNF</i>     | chr11:27226946-28226946 |     | 11p14.1-p11.2 | 11:27200000-48800000 | 613364 | <i>SPG41</i>                                             | 613364 | Spastic paraplegia 41, AD                        | AD |
|   |                 |                         |     |               |                      |        |                                                          |        |                                                  |    |
| 7 | <i>PPP1R14A</i> | chr19:37747491-38747490 |     | 19q           | 19:26200000-58617616 | 601764 | <i>BFIS1, BFIC1</i>                                      | 601764 | Seizures, benign familial infantile, 1           | AD |
| 7 | <i>PPP1R14A</i> | chr19:37747491-38747490 |     | 19q           | 19:26200000-58617616 | 607592 | <i>HPCQTL19</i>                                          | 176807 | Prostate cancer aggressiveness QTL               | AD |
| 7 | <i>PPP1R14A</i> | chr19:37747491-38747490 |     | 19q13         | 19:31900000-58617616 | 100070 | <i>AAA1, AAA</i>                                         | 100070 | Aortic aneurysm, familial abdominal 1            | AD |
| 7 | <i>PPP1R14A</i> | chr19:37747491-38747490 |     | 19q13         | 19:31900000-58617616 | 609376 | <i>CTRCT35, CATCN1</i>                                   | 609376 | Cataract 35, congenital nuclear                  | AR |
| 7 | <i>PPP1R14A</i> | chr19:37747491-38747490 |     | 19q13         | 19:31900000-58617616 | 611907 | <i>EA7</i>                                               | 611907 | Episodic ataxia, type 7                          | AD |
| 7 | <i>PPP1R14A</i> | chr19:37747491-38747490 |     | 19q13         | 19:31900000-58617616 | 600757 | <i>OFC3</i>                                              | 600757 | Orofacial cleft-3                                | AD |

|   |                 |                          |  |               |                       |        |                                                 |        |                                                              |        |
|---|-----------------|--------------------------|--|---------------|-----------------------|--------|-------------------------------------------------|--------|--------------------------------------------------------------|--------|
| 7 | <i>PPP1R14A</i> | chr19:37747491-38747490  |  | 19q13.1-q13.2 | 19:37906821-38208371  | 616655 | <i>SIPA1L3, SPAL3, SPAR3, KIAA0545, CTRCT45</i> | 616851 | Cataract 45                                                  | AR     |
| 7 | <i>PPP1R14A</i> | chr19:37747491-38747490  |  | 19q13.2-q13.3 | 19:38200000-50900000  | 611097 | <i>MRT11</i>                                    | 611097 | Mental retardation, autosomal recessive, 11                  | AR     |
| 7 | <i>PPP1R14A</i> | chr19:37747491-38747490  |  | 19q13.2       | 19:38200000-42900000  | 227050 | <i>TEC</i>                                      | 227050 | Transient erythroblastopenia of childhood                    | AR     |
| 7 | <i>PPP1R14A</i> | chr19:37747491-38747490  |  | 19q13.2       | 19:38264457-38292613  | 605124 | <i>SPINT2, HAI2, DIAR3</i>                      | 270420 | Diarrhea 3, secretory sodium, congenital, syndromic          | AR     |
| 7 | <i>PPP1R14A</i> | chr19:37747491-38747490  |  | 19q13.2       | 19:38433699-38587563  | 180901 | <i>RYR1, MHS, CCO</i>                           | 145600 | Malignant hyperthermia susceptibility 1                      | AD     |
| 7 | <i>PPP1R14A</i> | chr19:37747491-38747490  |  | 19q13.2       | 19:38433699-38587563  | 180901 | <i>RYR1, MHS, CCO</i>                           | 117000 | Neuromuscular disease, congenital, with uniform type 1 fiber | AR; AD |
| 7 | <i>PPP1R14A</i> | chr19:37747491-38747490  |  | 19q13.2       | 19:38433699-38587563  | 180901 | <i>RYR1, MHS, CCO</i>                           | 255320 | Minicore myopathy with external ophthalmoplegia              | AR     |
| 7 | <i>PPP1R14A</i> | chr19:37747491-38747490  |  | 19q13.2       | 19:38433699-38587563  | 180901 | <i>RYR1, MHS, CCO</i>                           | 145600 | King-Denborough syndrome                                     | AD     |
| 7 | <i>PPP1R14A</i> | chr19:37747491-38747490  |  | 19q13.2       | 19:38433699-38587563  | 180901 | <i>RYR1, MHS, CCO</i>                           | 117000 | Central core disease                                         | AR; AD |
| 7 | <i>PPP1R14A</i> | chr19:37747491-38747490  |  | 19q13.2       | 19:38647615-38730531  | 604638 | <i>ACTN4, FSGS1, FSGS</i>                       | 603278 | Glomerulosclerosis, focal segmental, 1                       | AD     |
|   |                 |                          |  |               |                       |        |                                                 |        |                                                              |        |
| 8 | <i>ABO</i>      | chr9:132773842-133784107 |  | 9q            | 9:43000000-138394717  | 607152 | <i>SPG19</i>                                    | 607152 | Spastic paraplegia 19, AD                                    | AD     |
| 8 | <i>ABO</i>      | chr9:132773842-133784107 |  | 9q31-q34      | 9:99800000-138394717  | 183840 | <i>SPDA2</i>                                    | 183840 | Spondyloarthropathy, susceptibility to, 2                    | AD     |
| 8 | <i>ABO</i>      | chr9:132773842-133784107 |  | 9q34          | 9:127500000-138394717 | 614623 | <i>KTCN6</i>                                    | 614623 | Keratoconus 6                                                | AD     |
| 8 | <i>ABO</i>      | chr9:132773842-133784107 |  | 9q34.13       | 9:131100000-133100000 | 171720 | <i>ALPQTL1</i>                                  | 171720 | Alkaline phosphatase, plasma level of, QTL1                  | AD     |
| 8 | <i>ABO</i>      | chr9:132773842-133784107 |  | 9q34.13       | 9:132891347-132945268 | 605284 | <i>TSC1, LAM</i>                                | 191100 | Tuberous sclerosis-1                                         | AD     |
| 8 | <i>ABO</i>      | chr9:132773842-133784107 |  | 9q34.13       | 9:132945544-132991696 | 604383 | <i>GF11B, BDPLT17</i>                           | 187900 | Bleeding disorder, platelet-type, 17                         | AR; AD |
| 8 | <i>ABO</i>      | chr9:132773842-133784107 |  | 9q34.13       | 9:133061977-133071862 | 114840 | <i>CEL, BSSL, CELL, MODY8</i>                   | 609812 | Maturity-onset diabetes of the young, type VIII              | AD     |
| 8 | <i>ABO</i>      | chr9:132773842-133784107 |  | 9q34.2        | 9:133351804-133356484 | 185620 | <i>SURF1, CMT4K</i>                             | 616684 | Charcot-Marie-Tooth disease, type 4K                         | AR     |
| 8 | <i>ABO</i>      | chr9:132773842-133784107 |  | 9q34.2        | 9:133414338-133459402 | 604134 | <i>ADAMTS13, VWFCP, TTP</i>                     | 274150 | Thrombotic thrombocytopenic purpura, familial                | AR     |
| 8 | <i>ABO</i>      | chr9:132773842-133784107 |  | 9q34.2        | 9:133514585-133524945 | 615345 | <i>MYMK, TMEM8C</i>                             | 254940 | Carey-Fineman-Ziter syndrome                                 | AR     |
| 8 | <i>ABO</i>      | chr9:132773842-133784107 |  | 9q34.2        | 9:133532163-133575518 | 612277 | <i>ADAMTSL2, KIAA0605, GPHYSD1</i>              | 231050 | Geleophysic dysplasia 1                                      | AR     |
| 8 | <i>ABO</i>      | chr9:132773842-133784107 |  | 9q34.2        | 9:133636362-133659343 | 609312 | <i>DBH</i>                                      | 223360 | Dopamine beta-hydroxylase deficiency                         | AR     |
| 8 | <i>ABO</i>      | chr9:132773842-133784107 |  | 9q34.2        | 9:133663073-133739957 | 604455 | <i>SARDH, SARD, SAR</i>                         | 268900 | Sarcosinemia                                                 | AR     |
|   |                 |                          |  |               |                       |        |                                                 |        |                                                              |        |
| 9 | <i>FBXL13</i>   | chr7:102334488-103334456 |  | 7q            | 7:60100000-159345973  | 252270 | <i>MLSM7, DEL7q, C7DELq</i>                     | 252270 | Myelodysplasia and leukemia syndrome with monosomy 7         | AR     |
| 9 | <i>FBXL13</i>   | chr7:102334488-103334456 |  | 7q21-q22      | 7:77900000-107800000  | 154276 | <i>MHS3</i>                                     | 154276 | Malignant hyperthermia susceptibility 3                      | AD     |
| 9 | <i>FBXL13</i>   | chr7:102334488-103334456 |  | 7q22-qter     | 7:98400000-159345973  | 162820 | <i>NM, NCR</i>                                  | 162820 | Neutrophil chemotactic response, abnormal                    | AD     |
| 9 | <i>FBXL13</i>   | chr7:102334488-103334456 |  | 7q22-q32      | 7:98400000-132900000  | 607458 | <i>SCA18, SMNA</i>                              | 607458 | Spinocerebellar ataxia 18                                    | AD     |

|    |                    |                            |  |                |                        |        |                                             |        |                                                                                    |    |
|----|--------------------|----------------------------|--|----------------|------------------------|--------|---------------------------------------------|--------|------------------------------------------------------------------------------------|----|
| 9  | <i>FBXL13</i>      | chr7:102334488-103334456   |  | 7q22.1         | 7:103297425-103329901  | 603131 | <i>PMPCB, MPPB</i>                          | 617954 | Multiple mitochondrial dysfunctions syndrome 6                                     | AR |
|    |                    |                            |  |                |                        |        |                                             |        |                                                                                    |    |
| 10 | <i>FAM155A</i>     | chr13:107063056-108063056' |  | 13             | 13:78500000-109600000  | 193003 | <i>NYS4</i>                                 | 193003 | Nystagmus 4, congenital, AD                                                        | AD |
| 11 | <i>FAM155A</i>     | chr13:107063056-108063056' |  | 13             | 13:78500000-109600000  | 193003 | <i>NYS4</i>                                 | 193003 | Nystagmus 4, congenital, AD                                                        | AD |
|    |                    |                            |  |                |                        |        |                                             |        |                                                                                    |    |
| 12 | <i>LYPLAL1-AS1</i> | chr1:218621228-219621228   |  | 1              | 1:185800000-236400000  | 145260 | <i>PHA2A, PHA2</i>                          | 145260 | Pseudohypoaldosteronism, type IIA                                                  | AD |
| 12 | <i>LYPLAL1-AS1</i> | chr1:218621228-219621228   |  | 1              | 1:214400000-248956422  | 615589 | <i>OTSC10</i>                               | 615589 | Otosclerosis 10                                                                    | AD |
| 12 | <i>LYPLAL1-AS1</i> | chr1:218621228-219621228   |  | 1              | 1:214400000-223900000  | 600332 | <i>RMD1</i>                                 | 600332 | Rippling muscle disease-1                                                          | AD |
| 12 | <i>LYPLAL1-AS1</i> | chr1:218621228-219621228   |  | 1              |                        | 108420 | <i>SPGF2, ASG</i>                           | 108420 | Spermatogenic failure 2                                                            | AD |
|    |                    |                            |  |                |                        |        |                                             |        |                                                                                    |    |
| 13 | <i>SLC25A28</i>    | chr10:99131412-100131412   |  | 10q22-q24      | 10:68800000-104000000  | 608583 | <i>ATFB1</i>                                | 608583 | Atrial fibrillation, familial, 1                                                   | AD |
| 13 | <i>SLC25A28</i>    | chr10:99131412-100131412   |  | 10q24.1-q25.1  | 10:95300000-110100000  | 606483 | <i>CMTDIA</i>                               | 606483 | Charcot-Marie-Tooth disease, dominant intermediate A                               | AD |
| 13 | <i>SLC25A28</i>    | chr10:99131412-100131412   |  | 10q24          | 10:95300000-104000000  | 246560 | <i>SHFM3, SHSF3, DUP10q24, C10DUPq24</i>    | 246560 | Split-hand/foot malformation 3, gene duplication syndrome                          | AD |
| 13 | <i>SLC25A28</i>    | chr10:99131412-100131412   |  | 10q24.2        | 10:98457076-99235874   | 613469 | <i>HPSE2, HPA2, UFS1</i>                    | 236730 | Urofacial syndrome 1                                                               | AR |
| 13 | <i>SLC25A28</i>    | chr10:99131412-100131412   |  | 10q24.2        | 10:99694792-99732665   | 603646 | <i>COX15, CEMCOX2</i>                       | 615119 | Cardioencephalomyopathy, fatal infantile, due to cytochrome c oxidase deficiency 2 | AR |
| 13 | <i>SLC25A28</i>    | chr10:99131412-100131412   |  | 10q24.2        | 10:99782597-99853740   | 601107 | <i>ABCC2, CMOAT</i>                         | 237500 | Dubin-Johnson syndrome                                                             | AR |
| 13 | <i>SLC25A28</i>    | chr10:99131412-100131412   |  | 10q24.2        | 10:100042307-100081884 | 603103 | <i>CPN1, SCPN, CPN</i>                      | 212070 | Carboxypeptidase N deficiency                                                      | AR |
|    |                    |                            |  |                |                        |        |                                             |        |                                                                                    |    |
| 14 | <i>NOV</i>         | chr8:118943954-119943953   |  | 8q             | 8:45200000-145138636   | 600668 | <i>CCAL1</i>                                | 600668 | Chondrocalcinosis with early-onset osteoarthritis                                  | AD |
| 14 | <i>NOV</i>         | chr8:118943954-119943953   |  | 8q23-q24       | 8:105100000-145138636  | 140300 | <i>HT</i>                                   | 140300 | Hashimoto thyroiditis                                                              | AD |
| 14 | <i>NOV</i>         | chr8:118943954-119943953   |  | 8q23-q24       | 8:105100000-145138636  | 611376 | <i>MGS</i>                                  | 611376 | Mungan syndrome                                                                    | AR |
| 14 | <i>NOV</i>         | chr8:118943954-119943953   |  | 8q24           | 8:116700000-145138636  | 600131 | <i>ECA1</i>                                 | 600131 | Epilepsy, childhood absence, 1                                                     | AD |
| 14 | <i>NOV</i>         | chr8:118943954-119943953   |  | 8q24           | 8:116700000-145138636  | 600669 | <i>EIG1</i>                                 | 600669 | Epilepsy, idiopathic generalized, susceptibility to, 1                             | AD |
| 14 | <i>NOV</i>         | chr8:118943954-119943953   |  | 8q24           | 8:116700000-145138636  | 601068 | <i>FAME1, BAFME1, MEBA</i>                  | 601068 | Epilepsy, myoclonic, familial adult, 1                                             | AD |
| 14 | <i>NOV</i>         | chr8:118943954-119943953   |  | 8q24.1         | 8:116700000-126300000  | 275220 | <i>THM</i>                                  | 275220 | Tibial hemimelia                                                                   | AR |
| 14 | <i>NOV</i>         | chr8:118943954-119943953   |  | 8q24.11-q24.13 | 8:116700000-126300000  | 150230 | <i>TRPS2, LGCR, LGS</i>                     | 150230 | Trichorhinophalangeal syndrome, type II                                            | AD |
| 14 | <i>NOV</i>         | chr8:118943954-119943953   |  | 8q24.12        | 8:118923556-118952143  | 602643 | <i>TNFRSF11B, OCIF, PDB5, OPG</i>           | 239000 | Paget disease of bone 5, juvenile-onset                                            | AR |
| 14 | <i>NOV</i>         | chr8:118943954-119943953   |  | 8q24.12        | 8:118952166-119108454  | 607620 | <i>COLEC10, CLL1, 3MC3</i>                  | 248340 | 3MC syndrome 3                                                                     | AR |
| 14 | <i>NOV</i>         | chr8:118943954-119943953   |  | 8q24.12        | 8:119730772-119832857  | 604912 | <i>TAF2, TAF2B, TAFII150, CIF150, MRT40</i> | 615599 | Mental retardation, autosomal recessive 40                                         | AR |

|    |                  |                         |     |              |                      |        |                                        |        |                                                                                   |        |
|----|------------------|-------------------------|-----|--------------|----------------------|--------|----------------------------------------|--------|-----------------------------------------------------------------------------------|--------|
|    |                  |                         |     |              |                      |        |                                        |        |                                                                                   |        |
| 15 | <i>COL6A1</i>    | chr21:45479539-46479540 | yes | 21q22.3      | 21:45981748-46005048 | 120220 | <i>COL6A1, BTHLMI, UCHMD1</i>          | 158810 | Bethlem myopathy 1                                                                | AR; AD |
| 15 | <i>COL6A1</i>    | chr21:45479539-46479540 | yes | 21q22.3      | 21:45981748-46005048 | 120220 | <i>COL6A1, BTHLMI, UCHMD1</i>          | 254090 | Ullrich congenital muscular dystrophy 1                                           | AR; AD |
| 15 | <i>COL6A1</i>    | chr21:45479539-46479540 |     | 21q22        | 21:30200000-46709983 | 609428 | <i>TUKLS</i>                           | 609428 | Tukel syndrome                                                                    | AR     |
| 15 | <i>COL6A1</i>    | chr21:45479539-46479540 |     | 21q22.3      | 21:41200000-46709983 | 236100 | <i>HPE1</i>                            | 236100 | Holoprosencephaly 1                                                               | AD     |
| 15 | <i>COL6A1</i>    | chr21:45479539-46479540 |     | 21q22.3      | 21:45405136-45513719 | 120328 | <i>COL18A1, KNO1</i>                   | 267750 | Knobloch syndrome, type 1                                                         | AR     |
| 15 | <i>COL6A1</i>    | chr21:45479539-46479540 |     | 21q22.3      | 21:46098070-46132848 | 120240 | <i>COL6A2, BTHLMI, UCMD1</i>           | 255600 | Myosclerosis, congenital                                                          | AR     |
| 15 | <i>COL6A1</i>    | chr21:45479539-46479540 |     | 21q22.3      | 21:46098070-46132848 | 120240 | <i>COL6A2, BTHLMI, UCMD1</i>           | 158810 | Bethlem myopathy 1                                                                | AR; AD |
| 15 | <i>COL6A1</i>    | chr21:45479539-46479540 |     | 21q22.3      | 21:46098070-46132848 | 120240 | <i>COL6A2, BTHLMI, UCMD1</i>           | 254090 | Ullrich congenital muscular dystrophy 1                                           | AR; AD |
| 15 | <i>COL6A1</i>    | chr21:45479539-46479540 |     | 21q22.3      | 21:46135980-46156481 | 606806 | <i>FTCD</i>                            | 229100 | Glutamate formiminotransferase deficiency                                         | AR     |
| 15 | <i>COL6A1</i>    | chr21:45479539-46479540 |     | 21q22.3      | 21:46188445-46228823 | 600909 | <i>LSS, OSC, CTCT44</i>                | 616509 | Cataract 44                                                                       | AR     |
| 15 | <i>COL6A1</i>    | chr21:45479539-46479540 |     | 21q22.3      | 21:46324121-46445768 | 605925 | <i>PCNT, PCNT2, KEN, SCKL4, MOPD2</i>  | 210720 | Microcephalic osteodysplastic primordial dwarfism, type II                        | AR     |
|    |                  |                         |     |              |                      |        |                                        |        |                                                                                   |        |
| 16 | <i>ELN</i>       | chr7:73513270-74513270  | yes | 7q11.23      | 7:74027771-74069906  | 130160 | <i>ELN, SVAS, ADCL1</i>                | 185500 | Supravalvar aortic stenosis                                                       | AD     |
| 16 | <i>ELN</i>       | chr7:73513270-74513270  | yes | 7q11.23      | 7:74027771-74069906  | 130160 | <i>ELN, SVAS, ADCL1</i>                | 123700 | Cutis laxa, AD                                                                    | AD     |
| 16 | <i>ELN</i>       | chr7:73513270-74513270  |     | 7p12.1-q21   | 7:50500000-98400000  | 614676 | <i>CMH21</i>                           | 614676 | Cardiomyopathy, hypertrophic, 21                                                  | AD     |
| 16 | <i>ELN</i>       | chr7:73513270-74513270  |     | 7p11-q21     | 7:53900000-98400000  | 608658 | <i>HPC4</i>                            | 176807 | Prostate cancer, susceptibility to, 4                                             | AD     |
| 16 | <i>ELN</i>       | chr7:73513270-74513270  |     | 7q           | 7:60100000-159345973 | 252270 | <i>MLSM7, DEL7q, C7DELq</i>            | 252270 | Myelodysplasia and leukemia syndrome with monosomy 7                              | AR     |
| 16 | <i>ELN</i>       | chr7:73513270-74513270  |     | 7q11.2       | 7:62100000-77900000  | 105800 | <i>ANIB1</i>                           | 105800 | Aneurysm, intracranial berry, 1                                                   | AD     |
| 16 | <i>ELN</i>       | chr7:73513270-74513270  |     | 7q11.2-q21.3 | 7:62100000-98400000  | 129900 | <i>EEC1</i>                            | 129900 | EEC syndrome-1                                                                    | AD     |
| 16 | <i>ELN</i>       | chr7:73513270-74513270  |     | 7q11.23      | 7:72700000-77900000  | 609757 | <i>DUP7q11.23, C7DUPq11.23</i>         | 609757 | Chromosome 7q11.23 duplication syndrome                                           | AD     |
| 16 | <i>ELN</i>       | chr7:73513270-74513270  |     | 7q11.23      | 7:72700000-77900000  | 194050 | <i>WBS, WMS, WS, DEL7q11, C7DELq11</i> | 194050 | Williams-Beuren syndrome                                                          | AD     |
|    |                  |                         |     |              |                      |        |                                        |        |                                                                                   |        |
| 17 | <i>LINC01082</i> | chr16:85699807-86699807 |     | 16q          | 16:36800000-90338345 | 194090 | <i>WT3</i>                             | 194090 | Wilms tumor, type 3                                                               | AD     |
| 17 | <i>LINC01082</i> | chr16:85699807-86699807 |     | 16q24.1      | 16:85899167-85922605 | 601565 | <i>IRF8, ICSBP1, IMD32A, IMD32B</i>    | 614893 | Immunodeficiency 32A, mycobacteriosis, AD                                         | AD     |
| 17 | <i>LINC01082</i> | chr16:85699807-86699807 |     | 16q24.1      | 16:85899167-85922605 | 601565 | <i>IRF8, ICSBP1, IMD32A, IMD32B</i>    | 226990 | Immunodeficiency 32B, monocyte and dendritic cell deficiency, autosomal recessive | AR     |
| 17 | <i>LINC01082</i> | chr16:85699807-86699807 |     | 16q24.1      | 16:86510526-86514463 | 601089 | <i>FOXF1, FKHL5, ACDMPV</i>            | 265380 | Alveolar capillary dysplasia with misalignment of pulmonary veins                 | AD     |
| 17 | <i>LINC01082</i> | chr16:85699807-86699807 |     | 16q24.1      | 16:86567250-86568932 | 602402 | <i>FOXC2, FKHL14, MFH1</i>             | 153400 | Lymphedema-distichiasis syndrome with renal disease and diabetes mellitus         | AD     |

|    |                     |                          |     |              |                       |        |                                   |        |                                                         |    |
|----|---------------------|--------------------------|-----|--------------|-----------------------|--------|-----------------------------------|--------|---------------------------------------------------------|----|
| 17 | <i>LINC01082</i>    | chr16:85699807-86699807  |     | 16q24.1      | 16:86567250-86568932  | 602402 | <i>FOXC2, FKHL14, MFH1</i>        | 153400 | Lymphedema-distichiasis syndrome                        | AD |
|    |                     |                          |     |              |                       |        |                                   |        |                                                         |    |
| 18 | <i>CRISPLD2</i>     | chr16:84323772-85323772  |     | 16q          | 16:36800000-90338345  | 194090 | <i>WT3</i>                        | 194090 | Wilms tumor, type 3                                     | AD |
|    |                     |                          |     |              |                       |        |                                   |        |                                                         |    |
| 19 | <i>LOC101927314</i> | chr6:97417019-98417019   |     | 6q           | 6:59800000-170805979  | 193007 | <i>BPPV</i>                       | 193007 | Vestibulopathy, familial                                | AD |
| 19 | <i>LOC101927314</i> | chr6:97417019-98417019   |     | 6q13-q16.1   | 6:69200000-98900000   | 611572 | <i>OTSC7</i>                      | 611572 | Otosclerosis 7                                          | AD |
| 19 | <i>LOC101927314</i> | chr6:97417019-98417019   |     | 6q13-q26     | 6:69200000-164100000  | 603175 | <i>SCZD5</i>                      | 181500 | Schizophrenia                                           | AD |
| 19 | <i>LOC101927314</i> | chr6:97417019-98417019   |     | 6q14-q16.2   | 6:75200000-100000000  | 600790 | <i>PBCRA, CRAPB</i>               | 600790 | Chorioretinal atrophy, progressive bifocal              | AD |
|    |                     |                          |     |              |                       |        |                                   |        |                                                         |    |
| 20 | <i>P2RY12</i>       | chr3:150857154-151857153 | yes | 3q25.1       | 3:151336842-151384811 | 600515 | <i>P2RY12, P2Y12, BDPLT8</i>      | 609821 | Bleeding disorder, platelet-type, 8                     | AR |
| 20 | <i>P2RY12</i>       | chr3:150857154-151857153 |     | 3q25.1       | 3:150926162-150972998 | 606397 | <i>CLRN1, USH3A, USH3, RP61</i>   | 276902 | Usher syndrome, type 3A                                 | AR |
|    |                     |                          |     |              |                       |        |                                   |        |                                                         |    |
| 21 | <i>CWC27</i>        | chr5:64499536-65499536   | yes | 5q12.3       | 5:64768917-65018762   | 617170 | <i>CWC27, SDCCAG10, RPSKA</i>     | 250410 | Retinitis pigmentosa with or without skeletal anomalies | AR |
| 21 | <i>CWC27</i>        | chr5:64499536-65499536   |     | 5q12         | 5:59600000-67400000   | 615668 | <i>DEL5q12, C5DELq12</i>          | 615668 | Chromosome 5q12 deletion syndrome                       | AD |
| 21 | <i>CWC27</i>        | chr5:64499536-65499536   |     | 5q12-q14     | 5:59600000-93000000   | 611364 | <i>EJM4</i>                       | 611364 | Myoclonic epilepsy, juvenile, 4                         | AD |
|    |                     |                          |     |              |                       |        |                                   |        |                                                         |    |
| 22 | <i>CALCB</i>        | chr11:14543689-15543689  |     | 11p15-p14    |                       | 606528 | <i>DEL11p15p14, C11DELp15p14</i>  | 606528 | Chromosome 11p15-p14 deletion syndrome                  | AR |
| 22 | <i>CALCB</i>        | chr11:14543689-15543689  |     | 11p15        |                       | 235000 | <i>IH, HHP</i>                    | 235000 | Hemihypertrophy                                         | AD |
| 22 | <i>CALCB</i>        | chr11:14543689-15543689  |     | 11p          |                       | 600165 | <i>NNO1</i>                       | 600165 | Nanophthalmos-1                                         | AD |
| 22 | <i>CALCB</i>        | chr11:14543689-15543689  |     | 11p15.2      | 11:14878004-14898914  | 608713 | <i>CYP2R1</i>                     | 600081 | Rickets due to defect in vitamin D 25-hydroxylation     | AR |
|    |                     |                          |     |              |                       |        |                                   |        |                                                         |    |
| 23 | <i>SI00A10</i>      | chr1:151498153-152498153 |     | 1p21.1-q21.3 | 1:101800000-155100000 | 612841 | <i>HYPT5, MUHH2</i>               | 612841 | Hypotrichosis 5                                         | AD |
| 23 | <i>SI00A10</i>      | chr1:151498153-152498153 |     | 1q12-q24     | 1:125100000-173000000 | 605549 | <i>CORD8</i>                      | 605549 | Cone-rod dystrophy 8                                    | AR |
| 23 | <i>SI00A10</i>      | chr1:151498153-152498153 |     | 1q21-q23     | 1:143200000-165500000 | 608372 | <i>DFNA49</i>                     | 608372 | Deafness, AD 49                                         | AD |
| 23 | <i>SI00A10</i>      | chr1:151498153-152498153 |     | 1q21-q23     | 1:143200000-165500000 | 601412 | <i>DFNA7</i>                      | 601412 | Deafness, AD 7                                          | AD |
| 23 | <i>SI00A10</i>      | chr1:151498153-152498153 |     | 1q21         | 1:143200000-155100000 | 161900 | <i>RFH1, AORF</i>                 | 161900 | Nephropathy-hypertension                                | AD |
| 23 | <i>SI00A10</i>      | chr1:151498153-152498153 |     | 1q21.3       | 1:150600000-155100000 | 139450 | <i>HRM2</i>                       | 139450 | Hair, curly                                             | AD |
| 23 | <i>SI00A10</i>      | chr1:151498153-152498153 |     | 1q21.3       | 1:151806070-151832450 | 602943 | <i>RORC, RORG, RZRG, IMD42</i>    | 616622 | Immunodeficiency 42                                     | AR |
| 23 | <i>SI00A10</i>      | chr1:151498153-152498153 |     | 1q21.3       | 1:152106316-152115453 | 190370 | <i>TCHH, THH, THL, TRHY, UHS3</i> | 617252 | Uncombable hair syndrome 3                              | AR |

[illegible]

|    |               |                         |     |                |                      |        |                                  |        |                                                        |    |
|----|---------------|-------------------------|-----|----------------|----------------------|--------|----------------------------------|--------|--------------------------------------------------------|----|
| 28 | <i>SEMI</i>   | chr7:95949252-96949252  | yes | 7q21.2-q21.3   | 7:91500000-98400000  | 183600 | <i>SEMI, SHFD1, SHSF1</i>        | 183600 | Split hand/foot malformation 1                         | AD |
| 28 | <i>SEMI</i>   | chr7:95949252-96949252  |     | 7p12.1-q21     | 7:50500000-98400000  | 614676 | <i>CMH21</i>                     | 614676 | Cardiomyopathy, hypertrophic, 21                       | AD |
| 28 | <i>SEMI</i>   | chr7:95949252-96949252  |     | 7p11-q21       | 7:53900000-98400000  | 608658 | <i>HPC4</i>                      | 176807 | Prostate cancer, susceptibility to, 4                  | AD |
| 28 | <i>SEMI</i>   | chr7:95949252-96949252  |     | 7q             | 7:60100000-159345973 | 252270 | <i>MLSM7, DEL7q, C7DELq</i>      | 252270 | Myelodysplasia and leukemia syndrome with monosomy 7   | AR |
| 28 | <i>SEMI</i>   | chr7:95949252-96949252  |     | 7q11.2-q21.3   | 7:62100000-98400000  | 129900 | <i>EEC1</i>                      | 129900 | EEC syndrome-1                                         | AD |
| 28 | <i>SEMI</i>   | chr7:95949252-96949252  |     | 7q21-q22       | 7:77900000-107800000 | 154276 | <i>MHS3</i>                      | 154276 | Malignant hyperthermia susceptibility 3                | AD |
| 28 | <i>SEMI</i>   | chr7:95949252-96949252  |     | 7q21.3         | 7:96120219-96322146  | 603859 | <i>SLC25A13, CTLN2</i>           | 603471 | Citrullinemia, adult-onset type II                     | AR |
| 28 | <i>SEMI</i>   | chr7:95949252-96949252  |     | 7q21.3         | 7:96120219-96322146  | 603859 | <i>SLC25A13, CTLN2</i>           | 605814 | Citrullinemia, type II, neonatal-onset                 | AR |
|    |               |                         |     |                |                      |        |                                  |        |                                                        |    |
| 29 | <i>CTAGE1</i> | chr18:21948776-22948774 |     | 18p11.23-q12.2 | 18:7200000-39500000  | 107200 | <i>ANIC</i>                      | 107200 | Anosmia, isolated congenital                           | AD |
| 29 | <i>CTAGE1</i> | chr18:21948776-22948774 |     | 18q            | 18:18500000-80373285 | 601808 | <i>DEL18q</i>                    | 601808 | Chromosome 18q deletion syndrome                       | AD |
| 29 | <i>CTAGE1</i> | chr18:21948776-22948774 |     | 18q            | 18:18500000-80373285 | 143850 | <i>OHDS</i>                      | 143850 | Orthostatic hypotensive disorder of Streeten           | AD |
| 29 | <i>CTAGE1</i> | chr18:21948776-22948774 |     | 18q11.2-q12.2  | 18:21500000-39500000 | 613930 | <i>APMR3</i>                     | 613930 | Alopecia-mental retardation syndrome 3                 | AR |
| 29 | <i>CTAGE1</i> | chr18:21948776-22948774 |     | 18q11.2        | 18:22169436-22202527 | 601656 | <i>GATA6, AVSD5, ASD9, PACHD</i> | 614475 | Atrial septal defect 9                                 | AD |
| 29 | <i>CTAGE1</i> | chr18:21948776-22948774 |     | 18q11.2        | 18:22169436-22202527 | 601656 | <i>GATA6, AVSD5, ASD9, PACHD</i> | 614474 | Atrioventricular septal defect 5                       | AD |
| 29 | <i>CTAGE1</i> | chr18:21948776-22948774 |     | 18q11.2        | 18:22169436-22202527 | 601656 | <i>GATA6, AVSD5, ASD9, PACHD</i> | 600001 | Pancreatic agenesis and congenital heart defects       | AD |
| 29 | <i>CTAGE1</i> | chr18:21948776-22948774 |     | 18q11.2        | 18:22169436-22202527 | 601656 | <i>GATA6, AVSD5, ASD9, PACHD</i> | 187500 | Tetralogy of Fallot                                    | AD |
| 29 | <i>CTAGE1</i> | chr18:21948776-22948774 |     | 18q11.2        | 18:22914120-23026485 | 604124 | <i>RBBP8, RIM, SCKL2, JWDS</i>   | 251255 | Jawad syndrome                                         | AR |
| 29 | <i>CTAGE1</i> | chr18:21948776-22948774 |     | 18q11.2        | 18:22914120-23026485 | 604124 | <i>RBBP8, RIM, SCKL2, JWDS</i>   | 606744 | Seckel syndrome 2                                      | AR |
|    |               |                         |     |                |                      |        |                                  |        |                                                        |    |
| 30 | <i>UBTF</i>   | chr17:43735410-44735410 | yes | 17q21.31       | 17:44205032-44221625 | 600673 | <i>UBTF, UBF, CONDBA</i>         | 617672 | Neurodegeneration, childhood-onset, with brain atrophy | AD |
| 30 | <i>UBTF</i>   | chr17:43735410-44735410 |     | 17q11.2-q24    | 17:27400000-72900000 | 154275 | <i>MHS2</i>                      | 154275 | Malignant hyperthermia susceptibility 2                | AD |
| 30 | <i>UBTF</i>   | chr17:43735410-44735410 |     | 17q12-q21      | 17:33500000-52100000 | 601363 | <i>WT4</i>                       | 601363 | Wilms tumor, type 4                                    | AD |
| 30 | <i>UBTF</i>   | chr17:43735410-44735410 |     | 17q21-q22      | 17:39800000-59500000 | 608474 | <i>MYP5</i>                      | 608474 | Myopia 5                                               | AD |
| 30 | <i>UBTF</i>   | chr17:43735410-44735410 |     | 17q21-q22      | 17:39800000-59500000 | 168860 | <i>PTLAH, FPAH</i>               | 168860 | Patella aplasia or hypoplasia                          | AD |
| 30 | <i>UBTF</i>   | chr17:43735410-44735410 |     | 17q21.31-q22   | 17:42800000-59500000 | 615162 | <i>MRT35</i>                     | 615162 | Mental retardation, autosomal recessive 35             | AR |
| 30 | <i>UBTF</i>   | chr17:43735410-44735410 |     | 17q21.31       | 17:43753730-43758787 | 605740 | <i>SOST, VBCH, CDD, SOST1</i>    | 122860 | Craniodiaphyseal dysplasia, AD                         | AD |
| 30 | <i>UBTF</i>   | chr17:43735410-44735410 |     | 17q21.31       | 17:43753730-43758787 | 605740 | <i>SOST, VBCH, CDD, SOST1</i>    | 269500 | Sclerosteosis 1                                        | AR |
| 30 | <i>UBTF</i>   | chr17:43735410-44735410 |     | 17q21.31       | 17:43753730-43758787 | 605740 | <i>SOST, VBCH, CDD</i>           | 239100 | Van Buchem disease                                     | AR |



|    |               |                          |     |                 |                       |        |                                                 |        |                                                                      |    |
|----|---------------|--------------------------|-----|-----------------|-----------------------|--------|-------------------------------------------------|--------|----------------------------------------------------------------------|----|
|    |               |                          |     |                 |                       |        | <i>SOST1</i>                                    |        |                                                                      |    |
| 30 | <i>UBTF</i>   | chr17:43735410-44735410  |     | 17q21.31        | 17:44004545-44009067  | 608300 | <i>NAGS</i>                                     | 237310 | N-acetylglutamate synthase deficiency                                | AR |
| 30 | <i>UBTF</i>   | chr17:43735410-44735410  |     | 17q21.31        | 17:44070699-44076343  | 611045 | <i>G6PC3, UGRP, SCN4</i>                        | 612541 | Dursun syndrome                                                      | AR |
| 30 | <i>UBTF</i>   | chr17:43735410-44735410  |     | 17q21.31        | 17:44070699-44076343  | 611045 | <i>G6PC3, UGRP, SCN4</i>                        | 612541 | Neutropenia, severe congenital 4, autosomal recessive                | AR |
| 30 | <i>UBTF</i>   | chr17:43735410-44735410  |     | 17q21.31        | 17:44248389-44268160  | 109270 | <i>SLC4A1, AE1, EPB3, SPH4, SAO, CHC</i>        | 185020 | Cryohydrocytosis                                                     | AD |
| 30 | <i>UBTF</i>   | chr17:43735410-44735410  |     | 17q21.31        | 17:44248389-44268160  | 109270 | <i>SLC4A1, AE1, EPB3, SPH4, SAO, CHC</i>        | 166900 | Ovalocytosis, SA type                                                | AD |
| 30 | <i>UBTF</i>   | chr17:43735410-44735410  |     | 17q21.31        | 17:44248389-44268160  | 109270 | <i>SLC4A1, AE1, EPB3, SPH4, SAO, CHC</i>        | 179800 | Renal tubular acidosis, distal, AD                                   | AD |
| 30 | <i>UBTF</i>   | chr17:43735410-44735410  |     | 17q21.31        | 17:44248389-44268160  | 109270 | <i>SLC4A1, AE1, EPB3, SPH4, SAO, CHC</i>        | 611590 | Renal tubular acidosis, distal, AR                                   | AR |
| 30 | <i>UBTF</i>   | chr17:43735410-44735410  |     | 17q21.31        | 17:44248389-44268160  | 109270 | <i>SLC4A1, AE1, EPB3, SPH4, SAO, CHC</i>        | 612653 | Spherocytosis, type 4                                                | AD |
| 30 | <i>UBTF</i>   | chr17:43735410-44735410  |     | 17q21.31        | 17:44345085-44353105  | 138945 | <i>GRN, CLN11</i>                               | 607485 | Aphasia, primary progressive                                         | AD |
| 30 | <i>UBTF</i>   | chr17:43735410-44735410  |     | 17q21.31        | 17:44345085-44353105  | 138945 | <i>GRN, CLN11</i>                               | 614706 | Ceroid lipofuscinosis, neuronal, 11                                  | AR |
| 30 | <i>UBTF</i>   | chr17:43735410-44735410  |     | 17q21.31        | 17:44345085-44353105  | 138945 | <i>GRN, CLN11</i>                               | 607485 | Frontotemporal lobar degeneration with ubiquitin-positive inclusions | AD |
| 30 | <i>UBTF</i>   | chr17:43735410-44735410  |     | 17q21.31        | 17:44372180-44389600  | 607759 | <i>ITGA2B, GP2B, CD41B, GT, BDPLT2, BDPLT16</i> | 187800 | Bleeding disorder, platelet-type, 16, AD                             | AD |
| 30 | <i>UBTF</i>   | chr17:43735410-44735410  |     | 17q21.31        | 17:44372180-44389600  | 607759 | <i>ITGA2B, GP2B, CD41B, GT, BDPLT2, BDPLT16</i> | 273800 | Glanzmann thrombasthenia                                             | AR |
|    |               |                          |     |                 |                       |        |                                                 |        |                                                                      |    |
| 31 | <i>CACNB2</i> | chr10:17651515-18651515  | yes | 10p12.33-p12.31 | 10:18140559-18545880  | 600003 | <i>CACNB2</i>                                   | 611876 | Brugada syndrome 4                                                   | AD |
|    |               |                          |     |                 |                       |        |                                                 |        |                                                                      |    |
| 32 | <i>BMPR1B</i> | chr4:94400268-95400268   | yes | 4q22.3          | 4:94757976-95158452   | 603248 | <i>BMPR1B, ALK6, AMDD, BDA2, BDAID</i>          | 112600 | Brachydactyly, type A2                                               | AD |
| 32 | <i>BMPR1B</i> | chr4:94400268-95400268   | yes | 4q22.3          | 4:94757976-95158452   | 603248 | <i>BMPR1B, ALK6, AMDD, BDA2, BDAID</i>          | 616849 | Brachydactyly, type A1, D                                            | AD |
| 32 | <i>BMPR1B</i> | chr4:94400268-95400268   | yes | 4q22.3          | 4:94757976-95158452   | 603248 | <i>BMPR1B, ALK6, AMDD, BDA2, BDAID</i>          | 609441 | Acromesomelic dysplasia, Demirhan type                               | AR |
| 32 | <i>BMPR1B</i> | chr4:94400268-95400268   |     | 4q21-q23        | 4:75300000-100100000  | 609566 | <i>PFM3</i>                                     | 609566 | Parietal foramina 3                                                  | AD |
|    |               |                          |     |                 |                       |        |                                                 |        |                                                                      |    |
| 33 | <i>HAS2</i>   | chr8:120746834-121746834 |     | 8q              | 8:45200000-145138636  | 600668 | <i>CCAL1</i>                                    | 600668 | Chondrocalcinosis with early-onset osteoarthritis                    | AD |
| 33 | <i>HAS2</i>   | chr8:120746834-121746834 |     | 8q23-q24        | 8:105100000-145138636 | 140300 | <i>HT</i>                                       | 140300 | Hashimoto thyroiditis                                                | AD |
| 33 | <i>HAS2</i>   | chr8:120746834-121746834 |     | 8q23-q24        | 8:105100000-145138636 | 611376 | <i>MGS</i>                                      | 611376 | Mungan syndrome                                                      | AR |
| 33 | <i>HAS2</i>   | chr8:120746834-121746834 |     | 8q24            | 8:116700000-145138636 | 600131 | <i>ECA1</i>                                     | 600131 | Epilepsy, childhood absence, 1                                       | AD |
| 33 | <i>HAS2</i>   | chr8:120746834-121746834 |     | 8q24            | 8:116700000-145138636 | 600669 | <i>EIG1</i>                                     | 600669 | Epilepsy, idiopathic generalized, susceptibility to, 1               | AD |
| 33 | <i>HAS2</i>   | chr8:120746834-121746834 |     | 8q24            | 8:116700000-145138636 | 601068 | <i>FAME1, BAFME1, MEBA</i>                      | 601068 | Epilepsy, myoclonic, familial adult, 1                               | AD |

|    |                 |                          |  |                |                       |        |                                  |        |                                                                                                   |    |
|----|-----------------|--------------------------|--|----------------|-----------------------|--------|----------------------------------|--------|---------------------------------------------------------------------------------------------------|----|
| 33 | <i>HAS2</i>     | chr8:120746834-121746834 |  | 8q24.1         | 8:116700000-126300000 | 275220 | <i>THM</i>                       | 275220 | Tibial hemimelia                                                                                  | AR |
| 33 | <i>HAS2</i>     | chr8:120746834-121746834 |  | 8q24.11-q24.13 | 8:116700000-126300000 | 150230 | <i>TRPS2, LGCR, LGS</i>          | 150230 | Trichorhinophalangeal syndrome, type II                                                           | AD |
| 33 | <i>HAS2</i>     | chr8:120746834-121746834 |  | 8q24.13-q24.21 | 8:121500000-130400000 | 614936 | <i>PPKP1B</i>                    | 614936 | Keratoderma, palmoplantar, punctate type IB                                                       | AD |
|    |                 |                          |  |                |                       |        |                                  |        |                                                                                                   |    |
| 34 | <i>PCSK5</i>    | chr9:75624524-76624524   |  | 9q             | 9:43000000-138394717  | 607152 | <i>SPG19</i>                     | 607152 | Spastic paraplegia 19, AD                                                                         | AD |
| 34 | <i>PCSK5</i>    | chr9:75624524-76624524   |  | 9q13-q21       | 9:61500000-87800000   | 190100 | <i>GSM1, GSP</i>                 | 190100 | Geniospasm                                                                                        | AD |
| 34 | <i>PCSK5</i>    | chr9:75624524-76624524   |  | 9q21-q22       | 9:65000000-99800000   | 611631 | <i>ETL4, ETOLM</i>               | 611631 | Epilepsy, familial temporal lobe, 4                                                               | AD |
|    |                 |                          |  |                |                       |        |                                  |        |                                                                                                   |    |
| 35 | <i>TIMP2</i>    | chr17:78360885-79360884  |  | 17q25          | 17:72900000-83257441  | 614163 | <i>DSPS</i>                      | 614163 | Delayed sleep phase syndrome, susceptibility to                                                   | AD |
| 35 | <i>TIMP2</i>    | chr17:78360885-79360884  |  | 17q25.1-q25.3  | 17:72900000-83257441  | 614149 | <i>NDNC9</i>                     | 614149 | Nail disorder, nonsyndromic congenital, 9                                                         | AR |
| 35 | <i>TIMP2</i>    | chr17:78360885-79360884  |  | 17q25.3        | 17:78991715-79009816  | 613165 | <i>CANT1, SCAN1, DBQD1, EDM7</i> | 617719 | Epiphyseal dysplasia, multiple, 7                                                                 | AR |
| 35 | <i>TIMP2</i>    | chr17:78360885-79360884  |  | 17q25.3        | 17:78991715-79009816  | 613165 | <i>CANT1, SCAN1, DBQD1, EDM7</i> | 251450 | Desbuquois dysplasia 1                                                                            | AR |
|    |                 |                          |  |                |                       |        |                                  |        |                                                                                                   |    |
| 36 | <i>ANO1</i>     | chr11:69659268-70659268  |  | 11p13-q14.1    | 11:31000000-85900000  | 614344 | <i>MRT23</i>                     | 614344 | Mental retardation, autosomal recessive 23                                                        | AR |
| 36 | <i>ANO1</i>     | chr11:69659268-70659268  |  | 11q13          | 11:63600000-77400000  | 166750 | <i>OTDD, C11DELq13, DEL11q13</i> | 166750 | Otodental dysplasia chromosome deletion syndrome                                                  | AD |
| 36 | <i>ANO1</i>     | chr11:69659268-70659268  |  | 11q13          | 11:63600000-77400000  | 607088 | <i>SMAR</i>                      | 607088 | Spinal muscular atrophy, chronic distal, autosomal recessive                                      | AR |
| 36 | <i>ANO1</i>     | chr11:69659268-70659268  |  | 11q13.3        | 11:69809967-69819423  | 164950 | <i>FGF3, INT2</i>                | 610706 | Deafness, congenital with inner ear agenesis, microtia, and microdontia                           | AR |
| 36 | <i>ANO1</i>     | chr11:69659268-70659268  |  | 11q13.3        | 11:70203162-70207401  | 602457 | <i>FADD</i>                      | 613759 | Infections, recurrent, with encephalopathy, hepatic dysfunction, and cardiovascular malformations | AR |
|    |                 |                          |  |                |                       |        |                                  |        |                                                                                                   |    |
| 37 | <i>TNRC6B</i>   | chr22:39799167-40799168  |  | 22q12-q13      | 22:25500000-50818468  | 603116 | <i>CDAGS</i>                     | 603116 | CDAGS syndrome                                                                                    | AR |
| 37 | <i>TNRC6B</i>   | chr22:39799167-40799168  |  | 22q12.3-q13.1  | 22:31800000-40600000  | 613689 | <i>MDNS</i>                      | 613689 | Mammary-digital-nail syndrome                                                                     | AD |
| 37 | <i>TNRC6B</i>   | chr22:39799167-40799168  |  | 22q13.1        | 22:40346499-40387407  | 608222 | <i>ADSL</i>                      | 103050 | Adenylosuccinase deficiency                                                                       | AR |
|    |                 |                          |  |                |                       |        |                                  |        |                                                                                                   |    |
| 38 | <i>PPP1R16B</i> | chr20:38364922-39364933  |  | 20p11.2-q13.12 | 20:17900000-47800000  | 612406 | <i>DYT17</i>                     | 612406 | Dystonia-17, primary torsion                                                                      | AR |
| 38 | <i>PPP1R16B</i> | chr20:38364922-39364933  |  | 20q11-q13      | 20:28100000-64444167  | 608029 | <i>SCAR6, CLA3</i>               | 608029 | Spinocerebellar ataxia, autosomal recessive 6                                                     | AR |
| 38 | <i>PPP1R16B</i> | chr20:38364922-39364933  |  | 20q12-q13.1    | 20:39000000-51200000  | 603694 | <i>NIDDM3</i>                    | 125853 | Diabetes mellitus, noninsulin-dependent                                                           | AD |
|    |                 |                          |  |                |                       |        |                                  |        |                                                                                                   |    |
| 39 | <i>NT5C1B</i>   | chr2:18256017-19237522   |  | 2pter-p24      |                       | 115800 | <i>CTRCT29</i>                   | 115800 | Cataract 29, coralliform                                                                          | AD |
| 39 | <i>NT5C1B</i>   | chr2:18256017-19237522   |  | 2p25-p22       |                       | 602134 | <i>ETM2, ETM</i>                 | 602134 | Essential tremor, hereditary, 2                                                                   | AD |

|    |                 |                          |  |              |                       |        |                                        |        |                                                                  |    |
|----|-----------------|--------------------------|--|--------------|-----------------------|--------|----------------------------------------|--------|------------------------------------------------------------------|----|
| 39 | <i>NT5C1B</i>   | chr2:18256017-19237522   |  | 2p25-p12     |                       | 101850 | <i>PPKP3</i>                           | 101850 | Keratoderma, palmoplantar, punctate type 3                       | AD |
| 39 | <i>NT5C1B</i>   | chr2:18256017-19237522   |  | 2p24         | 2:12000000-23800000   | 609800 | <i>GEFSP4</i>                          | 609800 | Epilepsy, generalized, with febrile seizures plus, type 4        | AD |
|    |                 |                          |  |              |                       |        |                                        |        |                                                                  |    |
| 40 | <i>C1QTNF7</i>  | chr4:14884759-15884760   |  | 4p16-p15     |                       | 612335 | <i>SPG38</i>                           | 612335 | Spastic paraplegia 38, AD                                        | AD |
| 40 | <i>C1QTNF7</i>  | chr4:14884759-15884760   |  | 4p15.3       | 4:11300000-21300000   | 604802 | <i>HDL3, HLN2</i>                      | 604802 | Huntington disease-like 3                                        | AR |
| 40 | <i>C1QTNF7</i>  | chr4:14884759-15884760   |  | 4p15.32      | 4:15468659-15601970   | 612013 | <i>CC2D2A, KIAA1345, MKS6</i>          | 612284 | Meckel syndrome 6                                                | AR |
| 40 | <i>C1QTNF7</i>  | chr4:14884759-15884760   |  | 4p15.32      | 4:15468659-15601970   | 612013 | <i>CC2D2A, KIAA1345, MKS6</i>          | 612285 | Joubert syndrome 9                                               | AR |
| 40 | <i>C1QTNF7</i>  | chr4:14884759-15884760   |  | 4p15.32      | 4:15468659-15601970   | 612013 | <i>CC2D2A, KIAA1345, MKS6</i>          | 216360 | COACH syndrome                                                   | AR |
|    |                 |                          |  |              |                       |        |                                        |        |                                                                  |    |
| 41 | <i>SNX24</i>    | chr5:122494034-123494035 |  | 5q21.3-q33.2 | 5:105100000-156300000 | 608970 | <i>MDBS2</i>                           | 608970 | Macular dystrophy, butterfly-shaped pigmentary, 2                | AD |
| 41 | <i>SNX24</i>    | chr5:122494034-123494035 |  | 5q22.1-q32   | 5:110200000-150400000 | 610535 | <i>GLC1M</i>                           | 610535 | Glaucoma 1, open angle, M                                        | AD |
| 41 | <i>SNX24</i>    | chr5:122494034-123494035 |  | 5q23-q35     | 5:115900000-181538259 | 181510 | <i>SCZD1</i>                           | 181500 | Schizophrenia                                                    | AD |
| 41 | <i>SNX24</i>    | chr5:122494034-123494035 |  | 5q23.2       | 5:123089102-123194265 | 616982 | <i>PRDM6, PRISM, PDA3</i>              | 617039 | Patent ductus arteriosus 3                                       | AD |
| 41 | <i>SNX24</i>    | chr5:122494034-123494035 |  | 5q23.2       | 5:123344884-123423591 | 613446 | <i>CEP120, CCDC100, SRTD13, JBTS31</i> | 617761 | Joubert syndrome 31                                              | AR |
| 41 | <i>SNX24</i>    | chr5:122494034-123494035 |  | 5q23.2       | 5:123344884-123423591 | 613446 | <i>CEP120, CCDC100, SRTD13, JBTS31</i> | 616300 | Short-rib thoracic dysplasia 13 with or without polydactyly      | AR |
|    |                 |                          |  |              |                       |        |                                        |        |                                                                  |    |
| 42 | <i>HLA-DQA1</i> | chr6:32142188-33142188   |  | 6p23-p21     | 6:13400000-46200000   | 271250 | <i>SCAR3, SCABD</i>                    | 271250 | Spinocerebellar ataxia, autosomal recessive 3                    | AR |
| 42 | <i>HLA-DQA1</i> | chr6:32142188-33142188   |  | 6p22-p21     | 6:15200000-46200000   | 600202 | <i>DYX2</i>                            | 600202 | Dyslexia, susceptibility to, 2                                   | AD |
| 42 | <i>HLA-DQA1</i> | chr6:32142188-33142188   |  | 6p22.3-p21.3 | 6:15200000-36600000   | 608244 | <i>OTSC3</i>                           | 608244 | Otosclerosis 3                                                   | AD |
| 42 | <i>HLA-DQA1</i> | chr6:32142188-33142188   |  | 6p21.3       | 6:30500000-36600000   | 107320 | <i>ATPLS</i>                           | 107320 | Antiphospholipid syndrome, familial                              | AD |
| 42 | <i>HLA-DQA1</i> | chr6:32142188-33142188   |  | 6p21.3       | 6:30500000-36600000   | 608645 | <i>DFNA31</i>                          | 608645 | Deafness, AD 31                                                  | AD |
| 42 | <i>HLA-DQA1</i> | chr6:32142188-33142188   |  | 6p21.3       | 6:30500000-36600000   | 222100 | <i>IDDM1</i>                           | 222100 | Diabetes mellitus, insulin-dependent-1                           | AR |
| 42 | <i>HLA-DQA1</i> | chr6:32142188-33142188   |  | 6p21.3-p21.2 | 6:30500000-40500000   | 150270 | <i>LAP</i>                             | 150270 | Laryngeal adductor paralysis                                     | AD |
| 42 | <i>HLA-DQA1</i> | chr6:32142188-33142188   |  | 6p21.3       | 6:30500000-36600000   | 600089 | <i>PBCA</i>                            | 600089 | Diabetes mellitus, insulin-dependent, neonatal                   | AR |
| 42 | <i>HLA-DQA1</i> | chr6:32142188-33142188   |  | 6p21.3       | 6:30500000-36600000   | 179450 | <i>RWS</i>                             | 179450 | Ragweed sensitivity                                              | AD |
| 42 | <i>HLA-DQA1</i> | chr6:32142188-33142188   |  | 6p21.3       | 6:30500000-36600000   | 193200 | <i>VAMAS6</i>                          | 193200 | Vitiligo-associated multiple autoimmune disease susceptibility 6 | AR |
| 42 | <i>HLA-DQA1</i> | chr6:32142188-33142188   |  | 6p21.3       | 6:30500000-36600000   | 153600 | <i>WMI</i>                             | 153600 | Macroglobulinemia, Waldenstrom, susceptibility to, 1             | AD |
| 42 | <i>HLA-DQA1</i> | chr6:32142188-33142188   |  | 6p21.32      | 6:32393338-32408878   | 606000 | <i>BTNL2, SS2</i>                      | 612387 | Sarcoidosis, susceptibility to, 2                                | AD |
| 42 | <i>HLA-DQA1</i> | chr6:32142188-33142188   |  | 6p21.32      | 6:32578768-32589835   | 142857 | <i>HLA-DRB1, SS1</i>                   | 181000 | Sarcoidosis, susceptibility to, 1                                | AD |

|    |                 |                           |  |             |                        |        |                                                |        |                                                                                      |    |
|----|-----------------|---------------------------|--|-------------|------------------------|--------|------------------------------------------------|--------|--------------------------------------------------------------------------------------|----|
| 42 | <i>HLA-DQA1</i> | chr6:32142188-33142188    |  | 6p21.32     | 6:32659463-32666688    | 604305 | <i>HLA-DQB1, CELIAC1</i>                       | 123400 | Creutzfeldt-Jakob disease, variant, resistance to                                    | AD |
| 42 | <i>HLA-DQA1</i> | chr6:32142188-33142188    |  | 6p21.32     | 6:32821832-32838822    | 170261 | <i>TAP2, ABCB3, PSF2, RING11</i>               | 604571 | Bare lymphocyte syndrome, type 1, due to TAP2 deficiency                             | AR |
| 42 | <i>HLA-DQA1</i> | chr6:32142188-33142188    |  | 6p21.32     | 6:32840716-32844934    | 177046 | <i>PSMB8, LMP7, RING10, JMP, NKJO, ALDD</i>    | 256040 | Autoinflammation, lipodystrophy, and dermatosis syndrome                             | AR |
| 42 | <i>HLA-DQA1</i> | chr6:32142188-33142188    |  | 6p21.32     | 6:32845208-32853970    | 170260 | <i>TAP1, ABCB2, RING4, PSF1</i>                | 604571 | Bare lymphocyte syndrome, type 1                                                     | AR |
|    |                 |                           |  |             |                        |        |                                                |        |                                                                                      |    |
| 43 | <i>PLEKHA1</i>  | chr10:121909427-122909426 |  | 10q26       | 10:117300000-133797422 | 615163 | <i>CORD17</i>                                  | 615163 | Cone-rod dystrophy 17                                                                | AD |
| 43 | <i>PLEKHA1</i>  | chr10:121909427-122909426 |  | 10q26       | 10:117300000-133797422 | 609625 | <i>DEL10q26, C10q26DEL</i>                     | 609625 | Chromosome 10q26 deletion syndrome                                                   | AD |
| 43 | <i>PLEKHA1</i>  | chr10:121909427-122909426 |  | 10q26.13    | 10:122461524-122514907 | 602194 | <i>HTRA1, PRSSI1, ARMD7, CARASIL, CADASIL2</i> | 600142 | CARASIL syndrome                                                                     | AR |
| 43 | <i>PLEKHA1</i>  | chr10:121909427-122909426 |  | 10q26.13    | 10:122461524-122514907 | 602194 | <i>HTRA1, PRSSI1, ARMD7, CARASIL, CADASIL2</i> | 616779 | Cerebral arteriopathy, AD, with subcortical infarcts and leukoencephalopathy, type 2 | AD |
|    |                 |                           |  |             |                        |        |                                                |        |                                                                                      |    |
| 45 | <i>HLX</i>      | chr1:220393031-221393031  |  | 1q31-q42    | 1:185800000-236400000  | 145260 | <i>PHA2A, PHA2</i>                             | 145260 | Pseudohypoaldosteronism, type IIA                                                    | AD |
| 45 | <i>HLX</i>      | chr1:220393031-221393031  |  | 1q41-q44    | 1:214400000-248956422  | 615589 | <i>OTSC10</i>                                  | 615589 | Otosclerosis 10                                                                      | AD |
| 45 | <i>HLX</i>      | chr1:220393031-221393031  |  | 1q41        | 1:214400000-223900000  | 600332 | <i>RMD1</i>                                    | 600332 | Rippling muscle disease-1                                                            | AD |
| 45 | <i>HLX</i>      | chr1:220393031-221393031  |  | Chr.1       |                        | 108420 | <i>SPGF2, ASG</i>                              | 108420 | Spermatogenic failure 2                                                              | AD |
|    |                 |                           |  |             |                        |        |                                                |        |                                                                                      |    |
| 46 | <i>EDEMI</i>    | chr3:5302151-6302149      |  | 3pter-p25   |                        | 613792 | <i>DEL3pterp25, C3DELpterp25</i>               | 613792 | 3p- syndrome                                                                         | AD |
| 46 | <i>EDEMI</i>    | chr3:5302151-6302149      |  | 3p26        |                        | 609299 | <i>HPC5</i>                                    | 176807 | Prostate cancer, hereditary, 5                                                       | AD |
| 46 | <i>EDEMI</i>    | chr3:5302151-6302149      |  | 3p26-p24.2  |                        | 252350 | <i>MYMY1, MYMY</i>                             | 252350 | Moyamoya disease                                                                     | AR |
|    |                 |                           |  |             |                        |        |                                                |        |                                                                                      |    |
| 47 | <i>LTBP1</i>    | chr2:32636358-33636358    |  | 2p25-p22    |                        | 602134 | <i>ETM2, ETM</i>                               | 602134 | Essential tremor, hereditary, 2                                                      | AD |
| 47 | <i>LTBP1</i>    | chr2:32636358-33636358    |  | 2p25-p12    |                        | 101850 | <i>PPKP3</i>                                   | 101850 | Keratoderma, palmoplantar, punctate type 3                                           | AD |
| 47 | <i>LTBP1</i>    | chr2:32636358-33636358    |  | 2p22.3-p21  | 2:31800000-47500000    | 114580 | <i>CANDFI, CMCT</i>                            | 114580 | Candidiasis, familial, 1, AD                                                         | AD |
|    |                 |                           |  |             |                        |        |                                                |        |                                                                                      |    |
| 48 | <i>STARD13</i>  | chr13:32653468-33653468   |  | 13q13-q14.3 | 13:31600000-54700000   | 600631 | <i>ENURI</i>                                   | 600631 | Enuresis, nocturnal, 1                                                               | AD |
| 48 | <i>STARD13</i>  | chr13:32653468-33653468   |  | 13q13.1     | 13:31600000-33400000   | 612089 | <i>HPRHP</i>                                   | 612089 | Hypophosphatemic rickets and hyperparathyroidism                                     | AD |
|    |                 |                           |  |             |                        |        |                                                |        |                                                                                      |    |
| 49 | <i>PLASI</i>    | chr15:67446124-68446123   |  | 15q         | 15:19000000-101991189  | 214900 | <i>LCSI, CHLS</i>                              | 214900 | Cholestasis-lymphedema syndrome                                                      | AR |
| 49 | <i>PLASI</i>    | chr15:67446124-68446123   |  | 15q23       | 15:68206991-68229741   | 606725 | <i>CLN6, CLN4A</i>                             | 204300 | Ceroid lipofuscinosis, neuronal, Kufs type, adult onset                              | AR |
| 49 | <i>PLASI</i>    | chr15:67446124-68446123   |  | 15q23       | 15:68206991-68229741   | 606725 | <i>CLN6, CLN4A</i>                             | 601780 | Ceroid lipofuscinosis, neuronal, 6                                                   | AR |

|    |              |                          |            |          |                       |        |              |        |                                                   |    |
|----|--------------|--------------------------|------------|----------|-----------------------|--------|--------------|--------|---------------------------------------------------|----|
|    |              |                          |            |          |                       |        |              |        |                                                   |    |
| 51 | <i>TRPS1</i> | chr8:115076317-116076321 | <b>yes</b> | 8q23.3   | 8:115408495-115669636 | 604386 | <i>TRPS1</i> | 190351 | Trichorhinophalangeal syndrome, type III          | AD |
| 51 | <i>TRPS1</i> | chr8:115076317-116076321 | <b>yes</b> | 8q23.3   | 8:115408495-115669636 | 604386 | <i>TRPS1</i> | 190350 | Trichorhinophalangeal syndrome, type I            | AD |
| 51 | <i>TRPS1</i> | chr8:115076317-116076321 |            | 8q       | 8:45200000-145138636  | 600668 | <i>CCAL1</i> | 600668 | Chondrocalcinosis with early-onset osteoarthritis | AD |
| 51 | <i>TRPS1</i> | chr8:115076317-116076321 |            | 8q13-q23 | 8:65100000-116700000  | 607731 | <i>CMT2H</i> | 607731 | Charcot-Marie-Tooth disease, axonal, type 2H      | AR |
| 51 | <i>TRPS1</i> | chr8:115076317-116076321 |            | 8q23-q24 | 8:105100000-145138636 | 140300 | <i>HT</i>    | 140300 | Hashimoto thyroiditis                             | AD |
| 51 | <i>TRPS1</i> | chr8:115076317-116076321 |            | 8q23-q24 | 8:105100000-145138636 | 611376 | <i>MGS</i>   | 611376 | Mungan syndrome                                   | AR |

### Supplementary Table 20: eQTL analysis

This table shows diverticular disease candidate SNPs (SNPs which are in LD of any independent lead SNPs) with a GWAS p-value  $<1.0 \times 10^{-5}$ ,  $MAF > 0.01$  that affect gene expression of candidate genes in sigmoid colon tissue (FDR  $< 0.05$  eQTL, GTEx\_V7 database) as a potential indicator of functional implications. The following table headers are used: DiscoveryLocus: risk locus assignment as in Supplementary Table 1; rsID : rsID based on dbSNP build 146; chr : chromosome; pos : position on hg19; effect\_allele : Effect/risk allele; MAF : Minor allele frequency computed based on 1000G; gwasP : P-value from BOLT GWAS summary statistics; Gene expression of eQTL Genes marked with an asterisk were analysed for differential expression in controls (Supplementary Table 9) and for phenotype-specific expression in anatomical layers of the colon (Supplementary Table 10).

| DiscoveryLocus | rsID       | chr | pos       | effect_allele | MAF     | gwasP   | eQTL Genes                    | p_eQTL      | FDR<0.05_eQTL |
|----------------|------------|-----|-----------|---------------|---------|---------|-------------------------------|-------------|---------------|
| 3              | rs10828815 | 10  | 25811764  | T             | 0.3608  | 6.8e-13 | <i>GPR158*</i>                | 8.58539e-10 | 1.5105e-05    |
| 5              | rs1946545  | 2   | 56036435  | A             | 0.2078  | 2.0e-06 | <i>RPS27A</i>                 | 1.06267e-05 | 0.0081485     |
| 7              | rs12976534 | 19  | 38743962  | A             | 0.495   | 2.3e-16 | <i>PPP1R14A*</i>              | 5.45618e-39 | 4.70966e-32   |
| 7              | rs35436012 | 19  | 38790635  | A             | 0.3509  | 8.4e-07 | <i>C19orf33</i>               | 1.1182e-05  | 5.55572e-09   |
| 8              | rs505922   | 9   | 136149229 | T             | 0.3678  | 4.5e-15 | <i>ABO*</i>                   | 1.99858e-13 | 4.33873e-09   |
| 14             | rs34112166 | 8   | 120400532 | G             | 0.1839  | 2.6e-11 | <i>NOV*</i>                   | 2.26152e-11 | 5.04956e-07   |
| 23             | rs6684114  | 1   | 151928715 | A             | 0.3052  | 8.4e-09 | <i>THEM4</i>                  | 1.35854e-07 | 4.42843e-06   |
| 23             | rs3791153  | 1   | 151958144 | A             | 0.2863  | 3.9e-11 | <i>S100A10*</i>               | 1.51883e-06 | 0.00173914    |
| 25             | rs2289328  | 15  | 40705417  | G             | 0.1491  | 7.5e-11 | <i>DISP2*</i>                 | 3.74554e-25 | 3.49097e-19   |
| 26             | rs9217     | 17  | 7363088   | T             | 0.3419  | 2.2e-10 | <i>CHRNBI</i>                 | 2.61112e-09 | 5.01543e-12   |
| 27             | rs2120109  | 15  | 76900654  | C             | 0.3042  | 6.9e-07 | <i>SCAPER*</i>                | 7.58033e-18 | 1.3597e-12    |
| 27             | rs2120109  | 15  | 76900654  | C             | 0.3042  | 6.9e-07 | <i>RP11-593F23.1</i>          | 8.83622e-07 | 2.03633e-06   |
| 30             | rs228768   | 17  | 42191893  | G             | 0.2992  | 6.2e-06 | <i>ASB16-AS1</i>              | 8.99607e-06 | 0.0239413     |
| 38             | rs208817   | 20  | 37492316  | C             | 0.4672  | 1.3e-06 | <i>FAM83D</i>                 | 4.37967e-06 | 2.96537e-19   |
| 41             | rs62377399 | 5   | 122324679 | G             | 0.3191  | 4.8e-08 | <i>RN7SL689P (pseudogene)</i> | 1.02254e-10 | 5.28914e-07   |
| 42             | rs9268614  | 6   | 32402778  | T             | 0.2018  | 9.5e-08 | <i>HLA-DRB6</i>               | 1.6391e-15  | 1.21805e-26   |
| 42             | rs1281935  | 6   | 32583820  | G             | 0.05268 | 1.9e-06 | <i>HLA-DQA2</i>               | 5.40847e-07 | 1.5472e-31    |
| 42             | rs3997872  | 6   | 32580617  | T             | 0.1551  | 1.6e-06 | <i>HLA-DRB1</i>               | 8.83716e-07 | 5.66271e-06   |
| 42             | rs7990     | 6   | 32609965  | C             | 0.06859 | 1.4e-08 | <i>BAG6</i>                   | 3.96831e-05 | 1.68144e-07   |
| 42             | rs1281947  | 6   | 32592009  | A             | 0.1551  | 1.3e-06 | <i>HLA-DOB</i>                | 2.69839e-05 | 9.2768e-19    |
| 45             | rs2738750  | 1   | 221050400 | G             | 0.4722  | 5.1e-07 | <i>RP11-295M18.2</i>          | 1.03776e-05 | 7.18793e-16   |

***Supplementary Table 21: Potential functional implications of candidate SNPs associated with diverticular disease (by CADD score >12.37 in descending order)***

This table shows diverticular disease candidate SNPs (SNPs which are in LD of any independent lead SNPs) with a GWAS p-value  $<1.0 \times 10^{-5}$ , MAF>0.01 and CADD score >12.37 in descending order by Combined Annotation-Dependent Depletion (CADD) score as a potential indicator of functional implications, correspondingly all exonic nonsynonymous SNPs are shown. The following table headers are used: uniqID: Unique ID of SNPs consisting of chr:position:allele1:allele2 where alleles are alphabetically ordered; rsID : rsID based on dbSNP build 146; chr : chromosome; pos : position on hg19; effect\_allele : Effect/risk allele ; non\_effect\_allele : Non-effect/non-risk ; MAF : Minor allele frequency computed based on 1000G; gwasP : P-value provided in the input GWAS summary statistics file; r2 : The maximum r2 of the SNP with one of the independent significant SNPs; IndSigSNP: rsID of the independent significant SNP which has the maximum r2 with the SNP; Genomic locus : Index of the genomic risk loci matching with "Genomic risk loci" Supplementary Table 5; nearestGene: The nearest Gene of the SNP based on ANNOVAR annotations; ANNOVAR annotates "consequence" function by prioritizing the most deleterious annotation for SNPs which are locating a genomic region where multiple genes are overlapped. Genes are encoded in symbol, if it is available otherwise Ensembl ID. Genes include all transcripts from Ensembl gene build 85 including non-protein coding genes and RNAs. CCG: manually selected curated candidate gene at risk locus (NCBI RefSeq annotation); CCG (replicating): nominal replication ( $P<0.05$ ) of lead SNP from PCG in European replication cohorts; dist : Distance to the nearest gene. SNPs which are locating in the gene body or 1kb up- or down-stream of TSS or TES have 0. func: Functional consequence of the SNP on the gene obtained from ANNOVAR. For exonic SNPs, detailed annotation (e.g. non-synonymous, stop gain and so on) is available in the ANNOVAR table (annov.txt). CADD: CADD score which is computed based on 63 annotations. The higher the score, the more deleterious the SNP is. 12.37 is the suggested threshold by Kircher et al (2014). RDB : RegulomeDB score which is a categorical score (from 1a to 7). 1a is the highest score for SNPs with the most biological evidence to be a regulatory element. minChrState : The minimum 15-core chromatin state across 127 tissue/cell type.

***References used in Supplementary Table 21***

Kircher M, Witten DM, Jain P, O'Roak BJ, Cooper GM, Shendure J. A general framework for estimating the relative pathogenicity of human genetic variants. *Nat Genet.* 2014 Mar;46(3):310-5.

| DiscoveryLocus | top_lead_SNP_uniqid | unqid           | #candidate SNPs | unqid              | chr | pos        | non_effect_allele | effect_allele | MAF     | gwasP    | r2         | IndigSNP    | nearestGene (Ensembl/Genecode annotation) | CCG                         | CCG (replication) | dist     | func                       | exonic_function | CADD  | RDB | minChrState |
|----------------|---------------------|-----------------|-----------------|--------------------|-----|------------|-------------------|---------------|---------|----------|------------|-------------|-------------------------------------------|-----------------------------|-------------------|----------|----------------------------|-----------------|-------|-----|-------------|
| 15             | 21:47545768.A.G     | n1024731        |                 | 21:47545768.A.G    | 21  | 47545768   | A                 | G             | 0.4901  | 1.6e-08  | 0.944457   | n108443991  | COL4A2                                    | COL4A2                      | 0                 | exonic   | nononymous SNV             | 25.8            | 4     | 3   |             |
| 16             | 7:73474825.C.G      | n17034066       |                 | 7:73474825.C.G     | 7   | 73474825   | C                 | G             | 0.09145 | 2.6e-06  | 0.7485771  | n10851722   | ELN                                       | ELN                         | 0                 | exonic   | nononymous SNV             | 23.2            | 2b    | 2   |             |
| 15             | 11:70034096.A.G     | n1740722        |                 | 11:70034096.A.G    | 11  | 70034096   | A                 | G             | 0.2152  | 9.2e-07  | 0.760705   | n1781659    | ANO1                                      | ANO1                        | 0                 | exonic   | nononymous SNV             | 22.9            | NA    | 4   |             |
| 30             | 17:42254417.A.G     | n1721884        |                 | 17:42254417.A.G    | 17  | 42254417   | A                 | G             | 0.2714  | 1.3e-07  | 0.780694   | 17:42260315 | AT A                                      | ASB16                       | 0                 | exonic   | nononymous SNV             | 22.8            | 4     | 4   |             |
| 1              | 2:44313821.A.G      | n14313821       |                 | 2:44313821.A.G     | 2   | 44313821   | A                 | G             | 0.2406  | 5.9e-09  | 0.892071   | n15651342   | ARHGAP15                                  | ARHGAP15                    | 0                 | ncRNA    | intronic                   | NA              | 21.4  | 7   | 1           |
| 32             | 4:95747824.C.CAG    | n15717456       |                 | 4:95747824.C.CAG   | 4   | 95747824   | C                 | CAG           | 0.4344  | 1.1e-07  | 0.720994   | n12023834   | BMPR1B                                    | BMPR1B                      | 0                 | intronic | NA                         | 22.2            | NA    | 5   |             |
| 29             | 18:20037597.A.G     | n1811327        |                 | 18:20037597.A.G    | 18  | 20037597   | A                 | G             | 0.2813  | 1.1e-08  | 0.89517    | n19960286   | CTAGE1                                    | CTAGE1                      | 0                 | intronic | NA                         | 21.6            | 6     | 2   |             |
| 1              | 3:14316027.C.T      | n11113111       |                 | 3:14316027.C.T     | 3   | 14316027   | C                 | T             | 0.5111  | 1.4e-07  | 0.93422    | n17632242   | COL4                                      | COL4                        | 0                 | intronic | downstream                 | NA              | 21.4  | 7   | 1           |
| 1              | 2:14440711.C.CAG    | n18084337       |                 | 2:14440711.C.CAG   | 2   | 14440711   | C                 | CAG           | 0.3111  | 2.6e-28  | 0.957179   | n1179600    | ARHGAP15                                  | ARHGAP15                    | 0                 | ncRNA    | intronic                   | NA              | 21.3  | NA  | 4           |
| 15             | 15:7647155.A.G      | n1259378        |                 | 15:7647155.A.G     | 15  | 7647155    | A                 | G             | 0.4563  | 5.4e-07  | 0.648184   | n167306087  | SCAPER                                    | SCAPER                      | 0                 | intronic | NA                         | 21.1            | 4     | 5   |             |
| 19             | 15:82829047.C.T     | n18202423       |                 | 15:82829047.C.T    | 15  | 82829047   | C                 | T             | 0.327   | 6.82e-09 | 0.92722    | n158816702  | PIAS1                                     | PIAS1                       | 0                 | ncRNA    | intronic                   | NA              | 19.79 | NA  | 4           |
| 1              | 2:14428793.C.T      | n17607879       |                 | 2:14428793.C.T     | 2   | 14428793   | C                 | T             | 0.1809  | 9.8e-54  | 0.972062   | n17833637   | ARHGAP15                                  | ARHGAP15                    | 0                 | ncRNA    | intronic                   | NA              | 20.6  | 5   | 4           |
| 34             | 9:78729313.C.T      | n1571791        |                 | 9:78729313.C.T     | 9   | 78729313   | C                 | T             | 0.4066  | 1.6e-07  | 0.658707   | n147466465  | PCSK5                                     | PCSK5                       | 0                 | intronic | NA                         | 20.5            | 4     | 2b  |             |
| 16             | 7:73474811.C.T      | n17034169       |                 | 7:73474811.C.T     | 7   | 73474811   | C                 | T             | 0.09149 | 1.1e-10  | 0.692238   | n112620918  | ELN                                       | ELN                         | 0                 | intronic | intergenic                 | NA              | 20.4  | 5   | 2           |
| 22             | 11:15066117.C.T     | n17482964       |                 | 11:15066117.C.T    | 11  | 15066117   | C                 | T             | 0.2386  | 2.0e-10  | 0.977352   | n157909118  | CALCB                                     | CALCB                       | 0                 | intronic | NA                         | 20.4            | 5     | 7   |             |
| 15             | 8:11633907.A.G      | n1254798        |                 | 8:11633907.A.G     | 8   | 11633907   | A                 | G             | 0.4394  | 4.9e-07  | 0.862341   | n12049865   | TRP51                                     | TRP51                       | 0                 | intronic | NA                         | 20.4            | 4     | 5   |             |
| 39             | 2:18800499.A.G      | n1761186        |                 | 2:18800499.A.G     | 2   | 18800499   | A                 | G             | 0.4561  | 1.1e-07  | 0.895951   | n161125298  | NTSC1                                     | NTSC1                       | 0                 | intronic | intergenic                 | NA              | 20.4  | 5   | 2           |
| 10             | 13:10790049.A.G     | n11636947       |                 | 13:10790049.A.G    | 13  | 10790049   | A                 | G             | 0.2326  | 2.3e-14  | 0.94039    | n19520339   | FAM155A                                   | FAM155A_1                   | 0                 | intronic | NA                         | 19.98           | 6     | 5   |             |
| 15             | 15:76513004.A.G     | n1291602        |                 | 15:76513004.A.G    | 15  | 76513004   | A                 | G             | 0.4672  | 2.4e-07  | 0.697262   | n17306087   | SCAPER                                    | SCAPER                      | 0                 | intronic | intergenic                 | NA              | 19.85 | 5   | 2           |
| 7              | 11:27747671.A.G     | n12288512       |                 | 11:27747671.A.G    | 11  | 27747671   | A                 | G             | 0.1799  | 1.3e-16  | 1          | n17309930   | BDNF                                      | BDNF                        | 0                 | ncRNA    | intronic                   | NA              | 19.83 | 5   | 13          |
| 1              | 2:144281981.T.A     | 2:144281981.T.A |                 | 2:144281981.T.A    | 2   | 144281981  | T                 | A             | 0.3819  | 4.4e-53  | 0.979119   | n16734367   | ARHGAP15                                  | ARHGAP15                    | 0                 | ncRNA    | intronic                   | NA              | 19.79 | NA  | 4           |
| 11             | 11:5081335.A.G      | n1082349        |                 | 11:5081335.A.G     | 11  | 5081335    | A                 | G             | 0.2376  | 2.0e-10  | 0.98272    | n157909118  | CALCB                                     | CALCB                       | 0                 | intronic | NA                         | 19.67           | 5     | 13  |             |
| 51             | 8:116576827.C.T     | n1808448        |                 | 8:116576827.C.T    | 8   | 116576827  | C                 | T             | 0.4225  | 1.8e-06  | 0.938423   | n12049865   | TRP51                                     | TRP51                       | 0                 | intronic | NA                         | 19.65           | 5     | 1   |             |
| 1              | 2:14433991.C.G      | n11685583       |                 | 2:14433991.C.G     | 2   | 14433991   | C                 | G             | 0.2036  | 3.7e-09  | 0.897371   | n156151621  | ARHGAP15                                  | ARHGAP15                    | 0                 | ncRNA    | intronic                   | NA              | 19.29 | 6   | 1           |
| 5              | 2:56196423.C.T      | n1672496        |                 | 2:56196423.C.T     | 2   | 56196423   | C                 | T             | 0.3767  | 1.3e-06  | 0.789972   | 2:56191019  | TA T                                      | EFEMP1                      | 0                 | ncRNA    | intronic                   | NA              | 19.13 | 5   | 5           |
| 19             | 6:98345853.A.T      | n16006737       |                 | 6:98345853.A.T     | 6   | 98345853   | A                 | T             | 0.4861  | 1.5e-07  | 0.663977   | n19482094   | RPL13A3023.1                              | LOC101927314 (RPL13A3023.1) | 0                 | ncRNA    | intronic                   | NA              | 19.06 | 6   | 14          |
| 5              | 5:15227293.C.G      | n19004          |                 | 5:15227293.C.G     | 5   | 15227293   | C                 | G             | 0.3191  | 7.9e-08  | 0.958361   | n15651342   | SNQ2                                      | SNQ2                        | 0                 | intronic | NA                         | 18.94           | 7     | 2   |             |
| 5              | 2:56004219.G.T      | n1675291        |                 | 2:56004219.G.T     | 2   | 56004219   | G                 | T             | 0.2157  | 8.3e-06  | 0.681429   | n15985553   | PMP1                                      | EFEMP1                      | 0                 | intronic | NA                         | 18.85           | 5     | 5   |             |
| 6              | 11:27748493.A.C     | n17309930       |                 | 11:27748493.A.C    | 11  | 27748493   | A                 | C             | 0.1799  | 6.8e-17  | 1          | n17309930   | BDNF                                      | BDNF                        | 0                 | ncRNA    | intronic                   | NA              | 18.82 | 5   | 13          |
| 21             | 5:6811896.C.T       | n15111833       |                 | 5:6811896.C.T      | 5   | 6811896    | C                 | T             | 0.4541  | 1.98e-07 | 0.901349   | n158816702  | CWC27                                     | CWC27                       | 0                 | intronic | intergenic                 | NA              | 18.8  | 6   | 5           |
| 18             | 18:20037576.A.G     | n1811326        |                 | 18:20037576.A.G    | 18  | 20037576   | A                 | G             | 0.2714  | 6.5e-10  | 0.979309   | n19960286   | CTAGE1                                    | CTAGE1                      | 0                 | intronic | NA                         | 18.8            | 6     | 2   |             |
| 19             | 8:120419182.G.T     | n1370146        |                 | 8:120419182.G.T    | 8   | 120419182  | G                 | T             | 0.2849  | 1.3e-11  | 0.729943   | n108089342  | NOV                                       | NOV                         | 0                 | intronic | NA                         | 18.75           | 7     | 2   |             |
| 34             | 17:4236442.C.T      | n11080007       |                 | 17:4236442.C.T     | 17  | 4236442    | C                 | T             | 0.2714  | 1.3e-07  | 0.780694   | 17:42260315 | AT A                                      | UHRF1                       | 0                 | intronic | NA                         | 18.7            | 11    | 1   |             |
| 40             | 9:78729176.A.T      | n17037190       |                 | 9:78729176.A.T     | 9   | 78729176   | A                 | T             | 0.4066  | 1.3e-07  | 0.658707   | n147466465  | PCSK5                                     | PCSK5                       | 0                 | intronic | NA                         | 18.7            | 9     | 5   |             |
| 44             | 10:105615074.C.T    | n105615074      |                 | 10:105615074.C.T   | 10  | 105615074  | C                 | T             | 0.3082  | 2.1e-07  | 0.617447   | n13752946   | SHPRX2A                                   | SHPRX2A                     | 0                 | UTRS     | NA                         | 18.66           | 4     | 1   |             |
| 21             | 5:64322590.A.G      | n1271000        |                 | 5:64322590.A.G     | 5   | 64322590   | A                 | G             | 0.2008  | 1.2e-09  | 0.915996   | n10471561   | CWC27                                     | CWC27                       | 0                 | intronic | intergenic                 | NA              | 18.59 | 5   | 2           |
| 17             | 17:42426033.C.T     | n1207464        |                 | 17:42426033.C.T    | 17  | 42426033   | C                 | T             | 0.2992  | 8.0e-09  | 0.901349   | 17:42260315 | AT A                                      | ARHGAP15                    | 0                 | ncRNA    | intronic                   | NA              | 18.59 | 11  | 1           |
| 1              | 2:144281981.A.C     | n10928184       |                 | 2:144281981.A.C    | 2   | 144281981  | A                 | C             | 0.2376  | 1.4e-09  | 0.942787   | n15651342   | ARHGAP15                                  | ARHGAP15                    | 0                 | ncRNA    | intronic                   | NA              | 18.55 | 4   | 4           |
| 5              | 2:56176031.C.T      | n1422809        |                 | 2:56176031.C.T     | 2   | 56176031   | C                 | T             | 0.3648  | 2.0e-06  | 0.737992   | 2:56191019  | TA T                                      | EFEMP1                      | 0                 | intronic | NA                         | 18.53           | 5     | 1   |             |
| 1              | 8:1165197691.C.G    | n1808428        |                 | 8:1165197691.C.G   | 8   | 1165197691 | C                 | G             | 0.1904  | 1.9e-07  | 0.855119   | n12049865   | TRP51                                     | TRP51                       | 0                 | intronic | intergenic                 | NA              | 18.1  | 6   | 5           |
| 7              | 7:102574999.T.TGAA  | n102574999      |                 | 7:102574999.T.TGAA | 7   | 102574999  | T                 | TGAA          | 0.3602  | 4.1e-06  | 0.739485   | n12531428   | FBX13                                     | FBX13                       | 0                 | exonic   | nonframeshift substitution | 18.49           | NA    | 1   |             |
| 1              | 2:144342661.C.T     | n10179961       |                 | 2:144342661.C.T    | 2   | 144342661  | C                 | T             | 0.3799  | 5.1e-54  | 0.910202   | n16734367   | ARHGAP15                                  | ARHGAP15                    | 0                 | ncRNA    | intronic                   | NA              | 18.46 | 5   | 4           |
| 1              | 5:122301079.C.T     | n19001          |                 | 5:122301079.C.T    | 5   | 122301079  | C                 | T             | 0.3191  | 1.6e-08  | 0.958361   | n15651342   | SNQ2                                      | SNQ2                        | 0                 | intronic | NA                         | 18.4            | 7     | 2   |             |
| 1              | 2:144178400.C.T     | n12612084       |                 | 2:144178400.C.T    | 2   | 144178400  | C                 | T             | 0.1797  | 1.4e-08  | 1          | n12612084   | ARHGAP15                                  | ARHGAP15                    | 0                 | ncRNA    | intronic                   | NA              | 18.34 | 5   | 4           |
| 13             | 8:12043892.C.T      | n17188373       |                 | 8:12043892.C.T     | 8   | 12043892   | C                 | T             | 0.1839  | 1.8e-11  | 0.738269   | n108089342  | NOV                                       | NOV                         | 0                 | ncRNA    | intronic                   | NA              | 18.22 | 5   | 5           |
| 42             | 6:12349086.C.T      | n1204865        |                 | 6:12349086.C.T     | 6   | 12349086   | C                 | T             | 0.3208  | 8.0e-07  | 0.859362   | 6:12327713  | GGA4A_G                                   | HC23                        | 0                 | intronic | intergenic                 | NA              | 18.01 | 6   | 5           |
| 33             | 8:12259446.C.G      | n1870765        |                 | 8:12259446.C.G     | 8   | 12259446   | C                 | G             | 0.2744  | 1.9e-09  | 0.959159   | n1871180    | HAS2                                      | HAS2                        | 0                 | intronic | NA                         | 18.09           | 4     | 5   |             |
| 14             | 8:12042084.A.T      | n17307983       |                 | 8:12042084.A.T     | 8   | 12042084   | A                 | T             | 0.1849  | 1.1e-11  | 0.729943   | n108089342  | NOV                                       | NOV                         | 0                 | intronic | NA                         | 18.07           | 6     | 5   |             |
| 3              | 10:15797906.C.G     | n1478908        |                 | 10:15797906.C.G    | 10  | 15797906   | C                 | G             | 0.2518  | 1.2e-12  | 0.696320   | n1514942    | GPR158                                    | GPR158                      | 0                 | intronic | NA                         | 17.95           | 8     | 2   |             |
| 3              | 17:42287519.C.T     | n1071167        |                 | 17:42287519.C.T    | 17  | 42287519   | C                 | T             | 0.2416  | 9.2e-08  | 0.606127   | 17:42260315 | AT A                                      | UHRF1                       | 0                 | exonic   | synonymous SNV             | 17.93           | NA    | 2   |             |
| 44             | 10:10564370.T.TC    | n1760414699     |                 | 10:10564370.T.TC   | 10  | 10564370   | T                 | TC            | 0.4622  | 8.6e-07  | 0.781138   | n13752946   | OBFC1                                     | STN1 (OBFC1)                | 0                 | intronic | NA                         | 17.91           | NA    | 4   |             |
| 15             | 15:82829047.C.T     | n18202423       |                 | 15:82829047.C.T    | 15  | 82829047   | C                 | T             | 0.4712  | 1.4e-06  | 0.816743   | n1873055    | PIAS1                                     | PIAS1                       | 0                 | intronic | NA                         | 17.87           | 12    | 1   |             |
| 49             | 6:98361770.C.T      | n1693598        |                 | 6:98361770.C.T     | 6   | 98361770   | C                 | T             | 0.4861  | 1.4e-06  | 0.620257   | n19482094   | RPL13A3023.1                              | LOC101927314 (RPL13A3023.1) | 0                 | ncRNA    | intronic                   | NA              | 17.85 | NA  | 4           |
| 13             | 13:108216200.A.G    | n1697078        |                 | 13:108216200.A.G   | 13  | 108216200  | A                 | G             | 0.1909  | 3.7e-13  | 0.925441   | n19555371   | FAM155A                                   | FAM155A_2*                  | 0                 | intronic | NA                         | 17.74           | 4     | 4   |             |
| 28             | 7:96171818.C.G      | n1671920        |                 | 7:96171818.C.G     | 7   | 96171920   | C                 | G             | 0.3539  | 3.6e-08  | 1          | n14752920   | SCAPER                                    | SCAPER                      | 0                 | intronic | NA                         | 17.74           | 6     | 14  |             |
| 41             | 5:122146272.C.T     | n12821387       |                 | 5:122146272.C.T    | 5   | 122146272  | C                 | T             | 0.46175 | 1.3e-06  | 0.91324965 | SNQ2        | SNQ2                                      | 0                           | intronic          | NA       | 17.74                      | 6               | 14    |     |             |
| 1              | 2:144337590.C.T     | n102574999      |                 | 2:144337590.C.T    | 2   | 144337590  | C                 | T             | 0.1839  | 4.6e-12  | 1          | 2:144437590 | TAAAGAAAAA                                | EFEMP1                      | 0                 | ncRNA    | intronic                   | NA              | 17.58 | NA  | 5           |
| 40             | 1:415379502.C.T     | n1455387        |                 | 1:415379502.C.T    | 4   | 15379502   | C                 | T             | 0.2744  | 1.6e-08  | 0.889751   | n14321788   | C12orf77                                  | C12orf77                    | 0                 | ncRNA    | intronic                   | NA              | 17.42 | 5   | 1           |
| 1              | 22:40951312.A.T     | n12821387       |                 | 22:40951312.A.T    | 22  | 40951312   | A                 | T             | 0.3161  | 1.4e-07  | 0.900372   | n1606103    | TNRC8                                     | TNRC8                       | 0                 | intronic | intergenic                 | NA              | 17.42 | 5   | 1           |
| 6              | 11:27748493.C.T     | n17309930       |                 | 11:27748493.C.T    | 11  | 27748493   | C                 | T             | 0.1799  | 1.2e-16  | 1          | n17309930   | BDNF                                      | BDNF                        | 0                 | nc       |                            |                 |       |     |             |



|    |                   |                  |                   |    |             |    |                |         |          |                                 |                   |          |                              |       |                 |                |       |          |    |       |   |   |
|----|-------------------|------------------|-------------------|----|-------------|----|----------------|---------|----------|---------------------------------|-------------------|----------|------------------------------|-------|-----------------|----------------|-------|----------|----|-------|---|---|
| 13 | 10.101382252-A.C  | rs4919369        | 10.101382252-A.C  | 10 | 10138252-A  | C  | 0.1203         | 1.2e-13 | 1        | rs709832                        | ENSG00000260475   | SUC2A28  | LOC101927314 (RP11-436023.1) | 0     | downstream      | NA             | 14.62 | 5        | 1  |       |   |   |
| 14 | 6.9849418-C.T     | rs11194230       | 6.9849418-C.T     | 6  | 9849418-T   | T  | 0.4404         | 1.5e-06 | 0.6678   | rs0482094                       |                   |          |                              | 0     | ncRNA, intronic | NA             | 14.61 | 7        | 5  |       |   |   |
| 15 | 10.124070803-C.T  | rs7081388        | 10.124070803-C.T  | 10 | 12407083-T  | C  | 0.0646         | 3.7e-06 | 0.6948   | rs12416882                      | TTATGATGGAGATAA T | P2RY12   | LOC101927314 (RP11-436023.1) | 0     | ncRNA, intronic | NA             | 14.61 | 7        | 5  |       |   |   |
| 19 | 3.15100558-A.G    | rs859584         | 3.15100558-A.G    | 3  | 15100558-A  | A  | 0.1879         | 4.5e-10 | 0.99345  | 3.1510061411_ACAT_A             | MDJL2             | P2RY12   | LOC101927314 (RP11-436023.1) | 0     | intronic        | NA             | 14.56 | 7        | 5  |       |   |   |
| 21 | 2.14434705-C.T    | rs11892829       | 2.14434705-C.T    | 2  | 14437805-T  | T  | 0.2316         | 4.5e-09 | 0.89138  | rs06151632                      | ARRGAP15          | ARRGAP15 |                              | 0     | ncRNA, intronic | NA             | 14.48 | 7        | 4  |       |   |   |
| 22 | 8.122205445-G.T   | rs122205445-G.T  | 8.122205445-G.T   | 8  | 12220544-G  | G  | 0.2074         | 1.1e-09 | 0.8717   | rs0471180                       | HA2               |          |                              | 0     | intronic        | NA             | 14.47 | 7        | 4  |       |   |   |
| 15 | 2.14745426-C.T    | rs13046626       | 2.14745426-C.T    | 21 | 4745426-T   | C  | 0.4891         | 1.8e-08 | 0.94107  | rs108443991                     | COL6A2            | COL6A1   | LOC101927314 (RP11-436023.1) | 0     | exonic          | synonymous SNV | 14.44 | 5        | 3  |       |   |   |
| 40 | 4.15372325-A.G    | rs4076789        | 4.15372325-A.G    | 4  | 15372325-A  | A  | 0.2744         | 2.3e-08 | 0.959335 | rs4132788                       | C10TNF7           | C10TNF7  |                              | 0     | ncRNA, intronic | NA             | 14.42 | 6        | 5  |       |   |   |
| 9  | 7.10259417-C.T    | rs10620124       | 7.10259417-C.T    | 7  | 10259417-T  | T  | 0.3191         | 2.1e-10 | 0.8191   | rs142441296                     | FBXL3             | FBXL3    |                              | 0     | intronic        | NA             | 14.39 | 7        | 4  |       |   |   |
| 30 | 17.42191893-G.T   | rs272878         | 17.42191893-G.T   | 17 | 42191893-T  | C  | 0.2992         | 6.2e-06 | 0.62877  | rs176816                        | URF1              | URF1     |                              | 0     | intronic        | NA             | 14.35 | NA       | 4  |       |   |   |
| 32 | 4.9585396-C.T     | rs1775209        | 4.9585396-C.T     | 4  | 9585396-T   | T  | 0.4496         | 6.2e-06 | 0.766329 | rs2023834                       | BMPRI8            | BMPRI8   |                              | 0     | intronic        | NA             | 14.24 | 4        | 2  |       |   |   |
| 42 | 6.12349772-C.T    | rs1304855        | 6.12349772-C.T    | 6  | 1234977-T   | C  | 0.3108         | 6.5e-06 | 0.85086  | 6.12349773_GAAA_G               | HC23              | HC23     |                              | 0     | intronic        | NA             | 14.22 | 5        | 5  |       |   |   |
| 1  | 2.14431002-A.G    | rs1092186        | 2.14431002-A.G    | 2  | 14431002-A  | G  | 0.2416         | 2.0e-09 | 0.95267  | rs05161632                      | ARRGAP15          | ARRGAP15 |                              | 0     | ncRNA, intronic | NA             | 14.19 | 6        | 2  |       |   |   |
| 51 | 8.116559435-A.G   | rs1808434        | 8.116559435-A.G   | 8  | 116559435-G | A  | 0.4324         | 1.8e-06 | 0.89406  | rs2049865                       | TRPS1             | TRPS1    |                              | 0     | intronic        | NA             | 14.18 | 7        | 4  |       |   |   |
| 15 | 11.71711381-A.G   | rs10114814       | 11.71711381-A.G   | 11 | 71711381-A  | A  | 0.2903         | 3.8e-05 | 0.76615  | rs0621269                       | BMP6              | BMP6     | LOC101927314 (RP11-436023.1) | 0     | ncRNA, intronic | NA             | 14.17 | NA       | 4  |       |   |   |
| 17 | 15.76609733-C.T   | rs17669733-C.T   | 15.76609733-C.T   | 15 | 76609733-C  | CT | 0.4732         | 6.9e-08 | 0.64508  | rs2056544                       | SCAPER            | SCAPER   |                              | 0     | intronic        | NA             | 14.16 | NA       | 4  |       |   |   |
| 51 | 5.122224118-A.ACA | rs174811825      | 5.122224118-A.ACA | 5  | 122224118-A | A  | ACATTCTGTGGCTG | 0.3201  | 1.4e-07  | 0.959971                        | rs14120495        | SNZ24    |                              | 0     | intronic        | NA             | 14.15 | NA       | 1  |       |   |   |
| 41 | 2.3381425-A.G     | rs1745466        | 2.3381425-A.G     | 2  | 3381425-G   | A  | 0.2932         | 2.4e-08 | 1        | rs0714546                       | URF1              | URF1     |                              | 0     | intronic        | NA             | 14.12 | 5        | 1  |       |   |   |
| 5  | 2.56029071-A.C    | rs1344732        | 2.56029071-A.C    | 2  | 56029071-A  | C  | 0.2734         | 8.2e-08 | 0.61728  | rs0989551                       | EFEMP1            | EFEMP1   |                              | 0     | intronic        | NA             | 14.09 | 7        | 5  |       |   |   |
| 27 | 17.42229015-A.G   | rs255918         | 17.42229015-A.G   | 17 | 42229015-A  | G  | 0.2406         | 3.0e-07 | 0.60172  | 17.42236016_AT_A                |                   |          | ENSG00000067394              | 0     | ncRNA, intronic | NA             | 14.08 | NA       | 3  |       |   |   |
| 27 | 15.7678314-A.C    | rs17012597       | 15.7678314-A.C    | 15 | 7678314-A   | C  | 0.327          | 9.4e-08 | 0.667499 | rs2056544                       | SCAPER            | SCAPER   |                              | 0     | intronic        | NA             | 14.06 | 6        | 4  |       |   |   |
| 27 | 15.76601871-A.G   | rs1786126        | 15.76601871-A.G   | 15 | 76601871-G  | A  | 0.4602         | 3.3e-07 | 0.684584 | rs07380897                      | ETFA              | SCAPER   |                              | 0     | intronic        | NA             | 14.03 | 7        | 5  |       |   |   |
| 19 | 6.98326220-GC     | rs08326220-GC    | 6.98326220-GC     | 6  | 98326220-G  | GC | 0.4891         | 7.8e-08 | 0.650261 | rs0482094                       | TRPS1             | TRPS1    | LOC101927314 (RP11-436023.1) | 0     | ncRNA, intronic | NA             | 14.02 | NA       | 5  |       |   |   |
| 51 | 8.116481498-C.G   | rs1080878        | 8.116481498-C.G   | 8  | 116481498-C | G  | 0.4584         | 6.2e-06 | 0.81799  | rs2049865                       | TRPS1             | TRPS1    | LOC101927314 (RP11-436023.1) | 0     | intronic        | NA             | 13.94 | 5        | 5  |       |   |   |
| 19 | 6.9832682-A.C     | rs0832682-A.C    | 6.9832682-A.C     | 6  | 9832682-A   | C  | 0.4891         | 7.0e-08 | 0.650261 | rs0482094                       | TRPS1             | TRPS1    | LOC101927314 (RP11-436023.1) | 0     | ncRNA, intronic | NA             | 13.9  | 7        | 5  |       |   |   |
| 38 | 20.37493576-A.G   | rs208814         | 20.37493576-A.G   | 20 | 37493576-G  | A  | 0.3827         | 5.0e-09 | 1        | rs208814                        | PPP1R16B          | PPP1R16B |                              | 0     | intronic        | NA             | 13.86 | NA       | 2  |       |   |   |
| 17 | 15.77082234-A.T   | rs15710279       | 15.77082234-A.T   | 15 | 77082234-A  | T  | 0.3052         | 5.8e-07 | 0.60706  | rs2056544                       | SCAPER            | SCAPER   |                              | 0     | intronic        | NA             | 13.85 | 6        | 4  |       |   |   |
| 8  | 8.120542085-A.G   | rs120542085-A    | 8.120542085-A.G   | 8  | 120542085-A | G  | 0.2137         | 1.3e-11 | 1        | rs12171427                      | NOV               | NOV      |                              | 0     | intronic        | NA             | 13.83 | 6        | 5  |       |   |   |
| 1  | 2.144186475-C.T   | rs4662330        | 2.144186475-C.T   | 2  | 144186475-T | T  | 0.159          | 6.8e-06 | 0.80828  | rs0736460                       | ARRGAP15          | ARRGAP15 |                              | 0     | ncRNA, intronic | NA             | 13.82 | 2b       | 5  |       |   |   |
| 1  | 15.7713322-A.C    | rs1633869        | 15.7713322-A.C    | 15 | 7713322-C   | A  | 0.3101         | 4.3e-07 | 0.625162 | rs2056544                       | SCAPER            | SCAPER   |                              | 0     | intronic        | NA             | 13.79 | 17       | 4  |       |   |   |
| 16 | 17.7392141-A.G    | rs1168077        | 17.7392141-A.G    | 17 | 7392141-A   | G  | 0.3187         | 6.1e-09 | 0.81887  | rs1204287                       | CALCB             | CALCB    |                              | 0     | intronic        | NA             | 13.79 | 7        | 4  |       |   |   |
| 13 | 8.116381869-A.G   | rs1963677        | 8.116381869-A.G   | 8  | 116381869-A | G  | 0.4225         | 1.6e-06 | 0.93823  | rs2048065                       | TRPS1             | TRPS1    |                              | 0     | intronic        | NA             | 13.73 | 7        | 5  |       |   |   |
| 10 | 10.10138191-A.T   | rs1033214        | 10.10138191-A.T   | 10 | 10138191-T  | A  | 0.1103         | 1.0e-13 | 1        | rs709832                        | SUC2A28           |          |                              | 6516  | intronic        | NA             | 13.72 | 6        | 5  |       |   |   |
| 13 | 1.151160384-A.G   | rs17011374       | 1.151160384-A.G   | 1  | 151160384-G | A  | 0.2799         | 4.3e-10 | 0.879183 | rs16314883                      | STROBP3           | STROBP3  | S100A10                      | 0     | intronic        | NA             | 13.71 | 7        | 5  |       |   |   |
| 27 | 15.76404151-A.G   | rs7161397        | 15.76404151-A.G   | 15 | 7640415-G   | A  | 0.496          | 1.7e-08 | 0.72856  | rs2056544                       | SCAPER            | SCAPER   |                              | 0     | intronic        | NA             | 13.7  | 7        | 5  |       |   |   |
| 20 | 3.151070692-C.T   | rs10915839       | 3.151070692-C.T   | 3  | 151070692-T | C  | 0.3688         | 8.6e-11 | 0.974163 | rs1723760                       | MDJL2.P2RY12      | P2RY12   |                              | 0     | intronic        | NA             | 13.69 | 7        | 5  |       |   |   |
| 41 | 4.1538354-C.T     | rs1488081        | 4.1538354-C.T     | 4  | 1538354-T   | C  | 0.3628         | 2.4e-06 | 0.65216  | rs1432788                       | C10TNF7           | C10TNF7  |                              | 0     | ncRNA, intronic | NA             | 13.69 | 5        | 5  |       |   |   |
| 22 | 11.15094191-C.T   | rs1540139        | 11.15094191-C.T   | 11 | 1509419-T   | C  | 0.2994         | 1.0e-09 | 0.87062  | rs275909118                     | CALCB             | CALCB    |                              | 0     | intronic        | NA             | 13.6  | 2b       | 5  |       |   |   |
| 31 | 10.18431986-A.G   | rs1547776        | 10.18431986-A.G   | 10 | 18431986-A  | G  | 0.2913         | 3.0e-09 | 0.682766 | rs1888693                       | CANCR2            | CANCR2   |                              | 0     | intronic        | NA             | 13.67 | 4        | 4  |       |   |   |
| 27 | 15.76531588-A.G   | rs2020246        | 15.76531588-A.G   | 15 | 76531588-A  | G  | 0.2465         | 1.3e-07 | 0.86267  | rs2398697                       | TYROBP            | SCAPER   |                              | 0     | ncRNA, exonic   | NA             | 13.67 | 5        | 4  |       |   |   |
| 27 | 2.22104985-A.T    | rs22104985-A.T   | 2.22104985-A.T    | 2  | 22104985-T  | T  | 0.3999         | 2.2e-07 | 0.74908  | rs26216188                      | TM6B              | TM6B     |                              | 0     | intronic        | NA             | 13.66 | 5        | 5  |       |   |   |
| 23 | 2.18690155-A.C    | rs4832623        | 2.18690155-A.C    | 2  | 18690155-A  | C  | 0.1441         | 4.3e-07 | 0.80856  | rs62121298                      | NTS1B             | NTS1B    |                              | 0     | downstream      | NA             | 13.57 | 5        | 4  |       |   |   |
| 18 | 18.20015171-C.T   | rs12607091       | 18.20015171-C.T   | 18 | 20015171-T  | C  | 0.2614         | 5.4e-10 | 0.99503  | rs0960286                       | CTAGE1            | CTAGE1   |                              | 0     | intronic        | NA             | 13.56 | 2a       | 5  |       |   |   |
| 18 | 18.20021891-C.T   | rs0962129        | 18.20021891-C.T   | 18 | 2002189-T   | C  | 0.2614         | 5.4e-10 | 0.99503  | rs0960286                       | CTAGE1            | CTAGE1   |                              | 0     | intronic        | NA             | 13.54 | 2a       | 5  |       |   |   |
| 1  | 2.14433705-C.G    | rs10167657       | 2.14433705-C.G    | 2  | 14433705-T  | C  | 0.2806         | 5.0e-09 | 0.807371 | rs06151632                      | ARRGAP15          | ARRGAP15 |                              | 0     | ncRNA, intronic | NA             | 13.54 | 6        | 5  |       |   |   |
| 23 | 1.151911254-A.G   | rs0687632        | 1.151911254-A.G   | 1  | 151911254-G | A  | 0.2793         | 4.4e-10 | 0.879183 | rs06151632                      | KRTBP28           | S100A10  |                              | 10745 | intronic        | NA             | 13.51 | 7        | 5  |       |   |   |
| 8  | 8.120517384-A.G   | rs1058193        | 8.120517384-A.G   | 8  | 120517384-G | A  | 0.2148         | 2.3e-10 | 0.85811  | rs17317427                      | NOV               | NOV      |                              | 0     | intronic        | synonymous SNV | 13.46 | NA       | 4  |       |   |   |
| 18 | 18.20015273-C.T   | rs2728667        | 18.20015273-C.T   | 18 | 20015273-T  | C  | 0.2614         | 5.3e-10 | 0.99503  | rs0960286                       | CTAGE1            | CTAGE1   |                              | 0     | intronic        | NA             | 13.43 | 4        | 5  |       |   |   |
| 17 | 15.7714295-C.T    | rs2592686        | 15.7714295-C.T    | 15 | 7714295-T   | C  | 0.3101         | 4.7e-07 | 0.625162 | rs2056544                       | SCAPER            | SCAPER   |                              | 0     | intronic        | NA             | 13.43 | 7        | 4  |       |   |   |
| 5  | 2.56138091-A.C    | rs1790640        | 2.56138091-A.C    | 2  | 56138091-A  | C  | 0.2449         | 1.7e-10 | 0.974073 | 2.56138103_TTGATCTGGGCTCCCTCC-T | EFEMP1            | EFEMP1   |                              | 0     | intronic        | NA             | 13.4  | 7        | 4  |       |   |   |
| 51 | 8.116560967-A.G   | rs1808436        | 8.116560967-A.G   | 8  | 116560967-G | A  | 0.4324         | 1.9e-06 | 0.89406  | rs2048065                       | TRPS1             | TRPS1    |                              | 0     | intronic        | NA             | 13.38 | 6        | 4  |       |   |   |
| 4  | 3.15502681-G.T    | rs7609987        | 3.15502681-G.T    | 3  | 15502681-T  | G  | 0.2416         | 5.6e-22 | 1        | rs7609987                       | COLQ              | COLQ     |                              | 0     | intronic        | NA             | 13.37 | 4        | 4  |       |   |   |
| 41 | 5.12234920-A.G    | rs0591618        | 5.12234920-A.G    | 5  | 12234920-G  | A  | 0.339          | 2.7e-06 | 0.873483 | rs14120495                      | SNZ24             | SNZ24    |                              | 0     | intronic        | NA             | 13.37 | 7        | 5  |       |   |   |
| 8  | 7.10250063-C.T    | rs1254384        | 7.10250063-C.T    | 7  | 10250063-T  | C  | 0.1392         | 2.9e-07 | 0.78767  | rs2573428                       | FBXL3             | FBXL3    |                              | 0     | intronic        | NA             | 13.33 | 6        | 5  |       |   |   |
| 15 | 15.7680083-C.T    | rs204856         | 15.7680083-C.T    | 15 | 7680083-T   | C  | 0.3489         | 1.8e-08 | 0.931394 | rs2056544                       | SCAPER            | SCAPER   |                              | 0     | intronic        | NA             | 13.28 | NA       | 5  |       |   |   |
| 22 | 11.5306582-A.TT   | rs115306582-A.TT | 11.5306582-A.TT   | 11 | 5306582-A   | T  | 0.2425         | 2.8e-10 | 0.95461  | rs75999118                      | CALCB             | CALCB    |                              | 0     | intronic        | NA             | 13.27 | NA       | 14 |       |   |   |
| 22 | 15.7716461-C.T    | rs4122776        | 15.7716461-C.T    | 15 | 7716461-T   | C  | 0.3162         | 6.6e-07 | 0.840761 | rs2056544                       | SCAPER            | SCAPER   |                              | 0     | intronic        | NA             | 13.27 | NA       | 14 |       |   |   |
| 1  | 2.144379627-A.G   | rs14617927       | 2.144379627-A.G   | 2  | 144379627-A | G  | 0.165          | 3.2e-12 | 1        | rs1440022                       | ARRGAP15          | ARRGAP15 |                              | 0     | intronic        | NA             | 13.23 | 7        | 4  |       |   |   |
| 20 | 3.15100841-A.C    | rs7617077        | 3.15100841-A.C    | 3  | 15100841-A  | C  | 0.4751         | 6.6e-10 | 0.91288  | rs1065374                       | MDJL2             | P2RY12   |                              | 0     | intronic        | NA             | 13.2  | 6        | 5  |       |   |   |
| 41 | 5.122327780-A.G   | rs1362166        | 5.122327780-A.G   | 5  | 122327780-G | A  | 0.3591         | 5.8e-08 | 0.85811  | rs06151632                      | SNZ24             | SNZ24    |                              | 0     | intronic        | NA             | 13.14 | 7        | 5  |       |   |   |
| 16 | 15.68282309-G.T   | rs0200246        | 15.68282309-G.T   | 15 | 68282309-T  | T  | 0.337          | 2.4e-06 | 0.615484 | rs428022                        |                   |          | ENSG00000061009              | PIA81 | PIA81           |                | 3683  | intronic | NA | 13.18 | 5 | 5 |
| 26 | 17.74345395-CACA  | rs177434539      | 17.74345395-CACA  | 17 | 74345395    |    |                |         |          |                                 |                   |          |                              |       |                 |                |       |          |    |       |   |   |
